# Supplementary material
Source: publisher figshare collection journal article supplement (https://frontiersin.figshare.com/ndownloader/files/26125535)
Supplement: Supplementary file 1 [file 26125535]

**SUPPLEMENTARY MATERIAL:** Marine Important Bird and Biodiversity Areas for penguins in Antarctica, targets for conservation action.


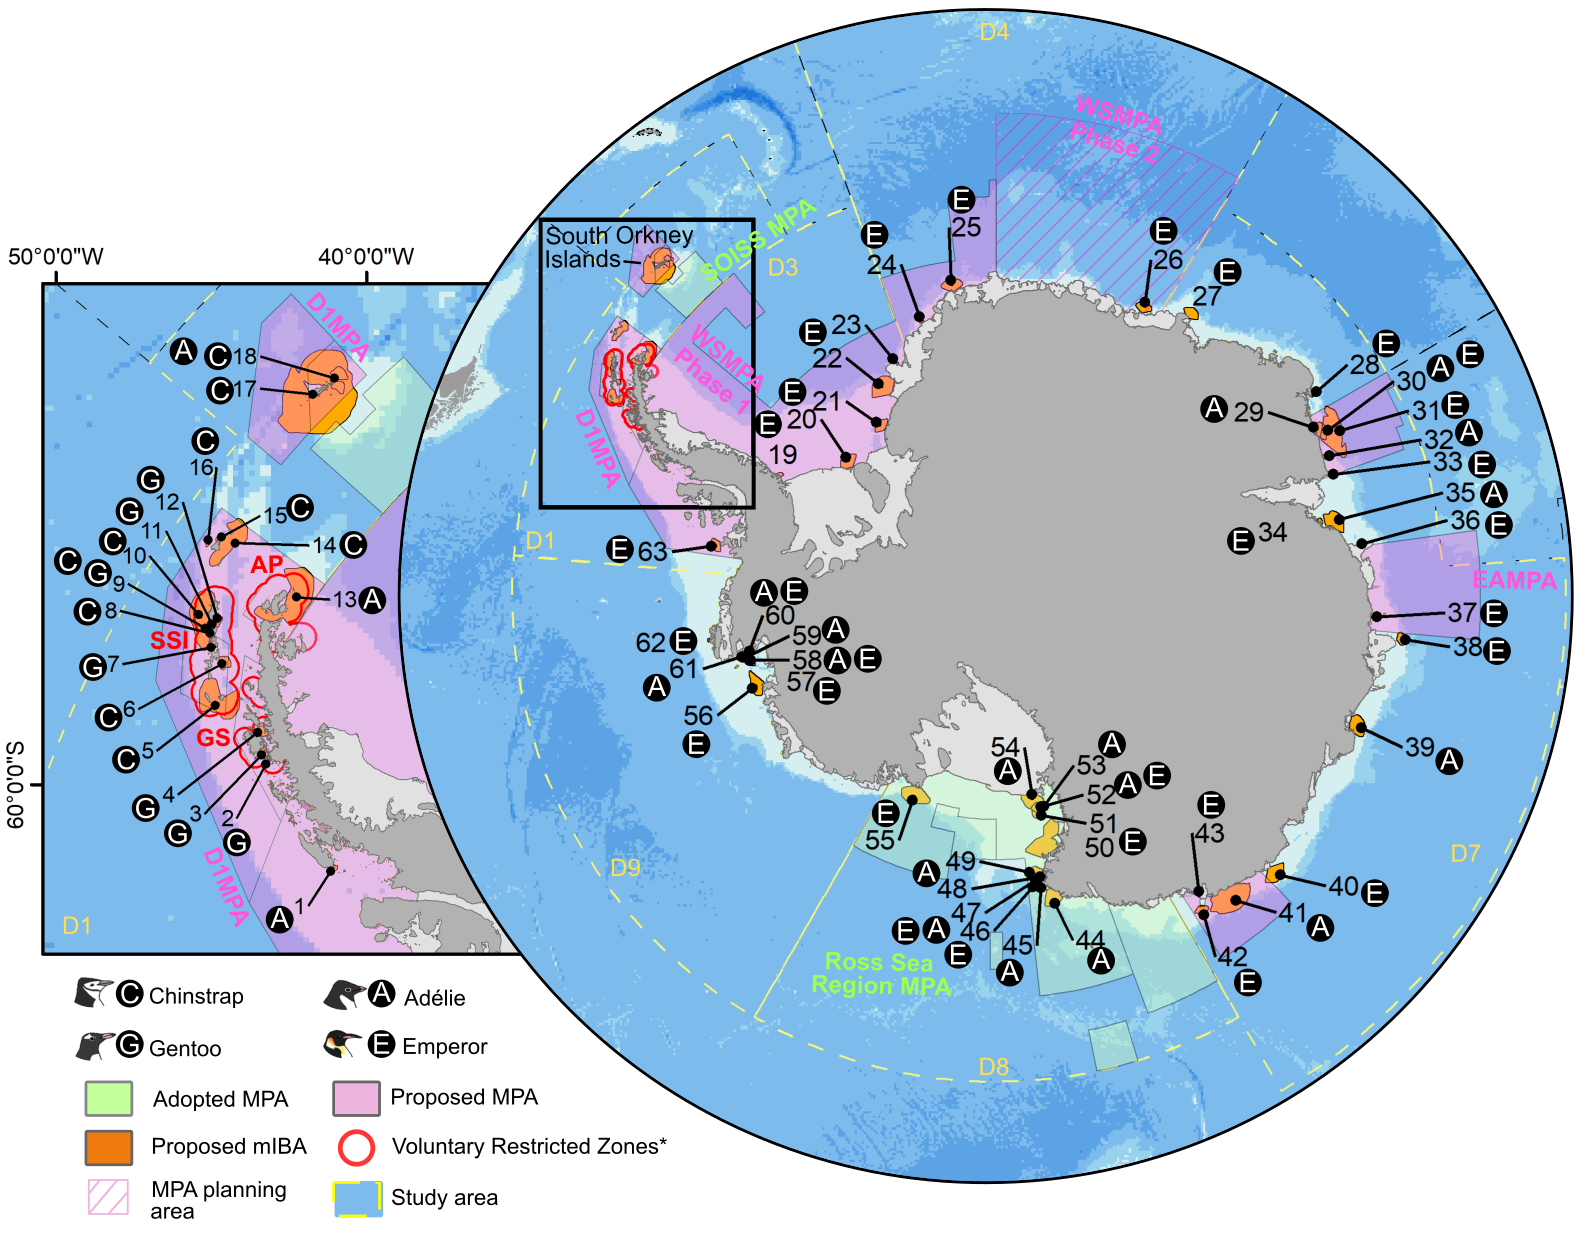


**Authors**

Jonathan Handley 1*, Marie-Morgane Rouyer2, Elizabeth J. Pearmain1, Victoria Warwick-Evans3, Katharina Teschke4, 5, Jefferson T. Hinke6, Heather Lynch7, 8, Louise Emmerson9, Colin Southwell9, Gary Griffith10, César A. Cárdenas11, Aldina M. A. Franco2, Phil Trathan3, Maria P. Dias1, 12*

1 BirdLife International, Cambridge, UK

2 School of Environmental Sciences, University of East Anglia, Norwich Research Park, Norwich, UK

3 British Antarctic Survey, Cambridge, UK

4 Alfred Wegener Institute, Helmholtz Centre for Polar and Marine Research, Bremerhaven, Germany

5 Helmholtz Institute for Functional Marine Biodiversity at the University Oldenburg (HIFMB), Ammerländer Heerstraße 231, 26129 Oldenburg, Germany

6 Antarctic Ecosystem Research Division, Southwest Fisheries Science Center, National Marine Fisheries Service, National Oceanic and Atmospheric Administration, La Jolla, California, USA

7 Department of Ecology and Evolution, Stony Brook University, Stony Brook, New York, USA

8 Institute for Advanced Computational Science, Stony Brook University, Stony Brook, New York, USA

9 Australian Antarctic Division, Department of Agriculture, Water and the Environment, Kingston, Tas., Australia

10 Norsk Polarinstitutt/Norwegian Polar Institute, Tromsø, Norway

11Departamento Científico, Instituto Antártico Chileno Plaza Muñoz Gamero 1055. Punta Arenas, Chile.

12 MARE - Marine and Environmental Sciences Centre, ISPA - Instituto Universitário

*Corresponding authors: BirdLife International, David Attenborough Building, Pembroke Street, Cambridge, CB3 3QZ, UK; [jonathan.m.handley@gmail.com](mailto:jonathan.m.handley@gmail.com), [maria.dias@birdlife.org](mailto:maria.dias@birdlife.org)

## Antarctica marine IBA inventory:

This document outlines the individual marine IBA sites identified for penguins in waters surrounding Antarctica. Data used to delineate sites is specific to breeding adult penguin species within CCAMLR MPA planning domains 1, 3, 4, 7, 8 and 9, during the chick-rearing period. For details regarding conservation and management implications of marine IBAs, and marine IBA delineation, we refer interested parties to the relevant manuscript and supporting material:

- Handley & Rouyer, et al. (2020). Marine Important Bird and Biodiversity Areas for penguins in Antarctica, targets for conservation action. BirdLife International, Cambridge, UK

Table of Contents

[Antarctica marine IBA inventory: 3](#_Toc57547415)

[Inventory overview: 7](#_Toc57547416)

[1. Antarctica marine IBA: 1 9](#_Toc57547417)

[2. Antarctica marine IBA: 2 12](#_Toc57547418)

[3. Antarctica marine IBA: 3 16](#_Toc57547419)

[4. Antarctica marine IBA: 4 20](#_Toc57547420)

[5. Antarctica marine IBA: 5 24](#_Toc57547421)

[6. Antarctica marine IBA: 6 30](#_Toc57547422)

[7. Antarctica marine IBA: 7 34](#_Toc57547423)

[8. Antarctica marine IBA: 8 37](#_Toc57547424)

[9. Antarctica marine IBA: 9 40](#_Toc57547425)

[10. Antarctica marine IBA: 10 45](#_Toc57547426)

[11. Antarctica marine IBA: 11 51](#_Toc57547427)

[12. Antarctica marine IBA: 12 54](#_Toc57547428)

[13. Antarctica marine IBA: 13 57](#_Toc57547429)

[14. Antarctica marine IBA: 14 61](#_Toc57547430)

[15. Antarctica marine IBA: 15 66](#_Toc57547431)

[16. Antarctica marine IBA: 16 70](#_Toc57547432)

[17. Antarctica marine IBA: 17 74](#_Toc57547433)

[18. Antarctica marine IBA: 18 81](#_Toc57547434)

[19. Antarctica marine IBA: 19 90](#_Toc57547435)

[20. Antarctica marine IBA: 20 93](#_Toc57547436)

[21. Antarctica marine IBA: 21 96](#_Toc57547437)

[22. Antarctica marine IBA: 22 99](#_Toc57547438)

[23. Antarctica marine IBA: 23 102](#_Toc57547439)

[24. Antarctica marine IBA: 24 105](#_Toc57547440)

[25. Antarctica marine IBA: 25 108](#_Toc57547441)

[26. Antarctica marine IBA: 26 111](#_Toc57547442)

[27. Antarctica marine IBA: 27 114](#_Toc57547443)

[28. Antarctica marine IBA: 28 117](#_Toc57547444)

[29. Antarctica marine IBA: 29 120](#_Toc57547445)

[30. Antarctica marine IBA: 30 124](#_Toc57547446)

[31. Antarctica marine IBA: 31 128](#_Toc57547447)

[32. Antarctica marine IBA: 32 131](#_Toc57547448)

[33. Antarctica marine IBA: 33 134](#_Toc57547449)

[34. Antarctica marine IBA: 34 137](#_Toc57547450)

[35. Antarctica marine IBA: 35 140](#_Toc57547451)

[36. Antarctica marine IBA: 36 143](#_Toc57547452)

[37. Antarctica marine IBA: 37 146](#_Toc57547453)

[38. Antarctica marine IBA: 38 149](#_Toc57547454)

[39. Antarctica marine IBA: 39 152](#_Toc57547455)

[40. Antarctica marine IBA: 40 156](#_Toc57547456)

[41. Antarctica marine IBA: 41 159](#_Toc57547457)

[42. Antarctica marine IBA: 42 163](#_Toc57547458)

[43. Antarctica marine IBA: 43 166](#_Toc57547459)

[44. Antarctica marine IBA: 44 169](#_Toc57547460)

[45. Antarctica marine IBA: 45 172](#_Toc57547461)

[46. Antarctica marine IBA: 46 175](#_Toc57547462)

[47. Antarctica marine IBA: 47 178](#_Toc57547463)

[48. Antarctica marine IBA: 48 181](#_Toc57547464)

[49. Antarctica marine IBA: 49 184](#_Toc57547465)

[50. Antarctica marine IBA: 50 187](#_Toc57547466)

[51. Antarctica marine IBA: 51 190](#_Toc57547467)

[52. Antarctica marine IBA: 52 193](#_Toc57547468)

[53. Antarctica marine IBA: 53 196](#_Toc57547469)

[54. Antarctica marine IBA: 54 199](#_Toc57547470)

[55. Antarctica marine IBA: 55 202](#_Toc57547471)

[56. Antarctica marine IBA: 56 205](#_Toc57547472)

[57. Antarctica marine IBA: 57 208](#_Toc57547473)

[58. Antarctica marine IBA: 58 211](#_Toc57547474)

[59. Antarctica marine IBA: 59 214](#_Toc57547475)

[60. Antarctica marine IBA: 60 217](#_Toc57547476)

[61. Antarctica marine IBA: 61 220](#_Toc57547477)

[62. Antarctica marine IBA: 62 223](#_Toc57547478)

[63. Antarctica marine IBA: 63 226](#_Toc57547479)

[Colony Codes 229](#_Toc57547480)


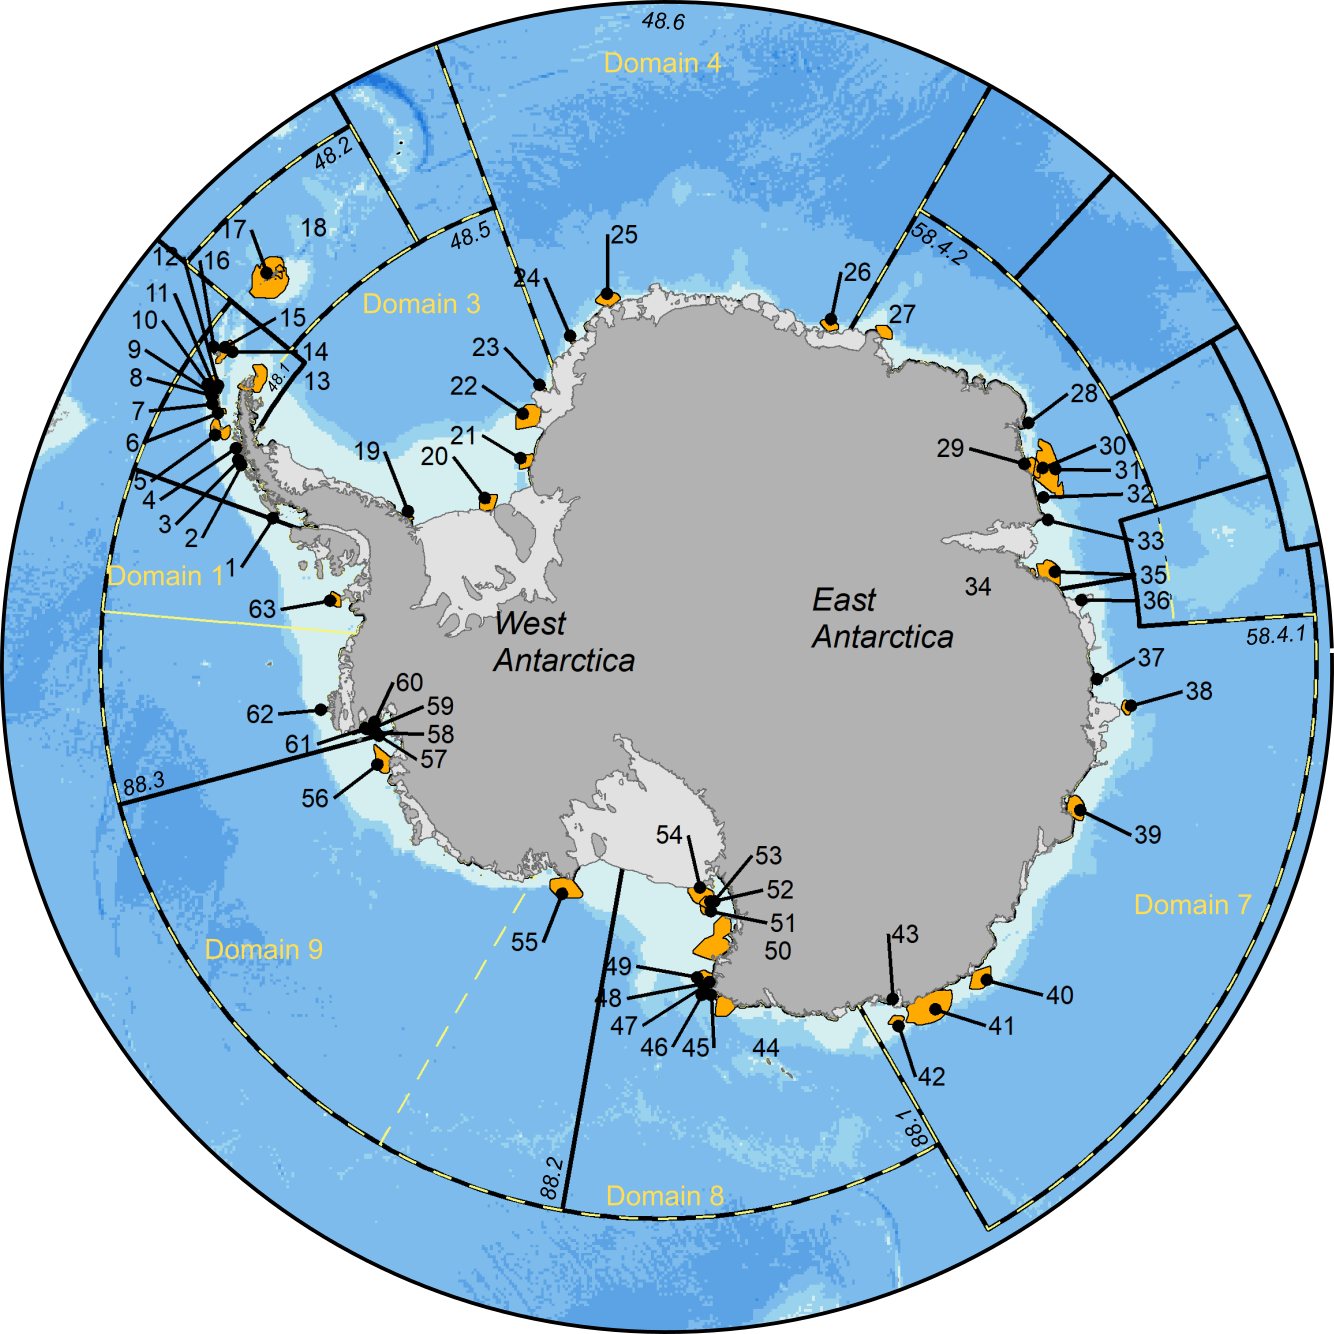


Figure 1:Marine IBAs (orange polygons, 1-63) for the four species of penguins breeding in Antarctica (Adélie, Chinstrap, Gentoo and Emperor Penguins). Sites delineated based on foraging distribution data from breeding adult penguins during the chick-rearing period.

### Inventory overview:

Each site is currently represented by a numeric code that runs clockwise around Antarctica from the Antarctic Peninsula. See Figure 1.

Individual site details include:

- An overview table

| Site code | Numeric clockwise code |
| --- | --- |
| Species | ADP (Adélie), CHP (Chinstrap), EMP (Emperor), GEP (Gentoo) |
| IBA Criteria | A4: Congregations (Site hosts >1% of the global population) |
| Decimal Latitude | The decimal latitude of the centroid of the site |
| Decimal Longitude | The decimal longitude of the centroid of the site |
| Area (ha) | Area in hectares |
| Area (km2) | Area in kilometres squared |
| MPA Overlap | Which MPA the site primarily overlaps with |
| MPA Type | The type of MPA |
| MPA Zones | The specific zoning with the MPA |

- Table 1

Population estimates (breeding pairs) and count types from the density distribution surfaces (those that triggered IBA Criteria A4, >1% of global population) for key penguin species in the specific marine IBA. Note, the lower population estimate is bound by the 1% global population threshold.

- Table 2

Population estimates and count types for penguin species colony(ies) and their individual density distribution surfaces that contributed to the delineation of the specific Antarctic marine IBA. Note, the lower population estimate represents the lowest estimated number of breeding pairs from a given colony contributing to the delineation of the marine IBA site. The lower population estimate may therefore be zero when only part of the individual colony(ies) density distribution surface contributed to the marine IBA. The Count Year for the median population estimate indicates the number of yearly population assessments for the given colony. Colony names are given in the ‘Colony Codes’ table at the end of this document.

- Colony codes and raw data

Colony codes and actually colony names, including the locations of individual colonies, and the count data used for the analysis are available in the ‘Colony Codes’ table at the end of this document and the supporting Microsoft Excel .csv file: “mIBA_Antarctica_PenguinColPopData_ForagingRadius_June2020.csv”.

- Legend

Colonies for specific penguin species are indicated as outlined below. Those with a pink circle are the source colonies that contributed to the relevant marine IBA:


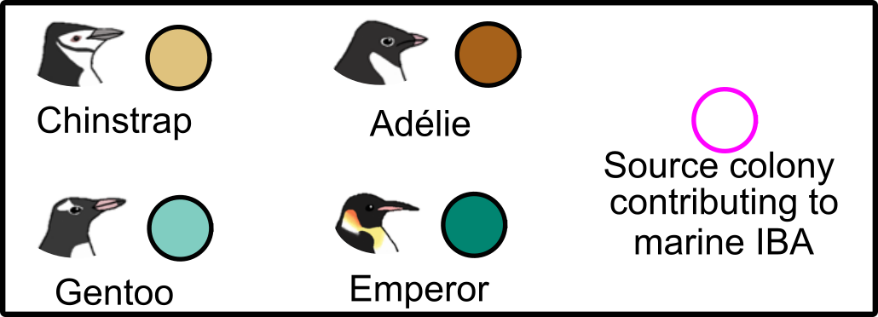


- Site and overview plots

Dark orange polygons indicate the relevant site, while light orange polygons indicate the other marine IBA sites. Red bounding box indicates location of the marine IBA in relation to the broader context of Antarctica.

# **Antarctica marine IBA: 1**

| Site code | 1 |
| --- | --- |
| Species | ADP |
| IBA criteria | A4: Congregations |
| Decimal Latitude | -67.804 |
| Decimal Longitude | -68.967 |
| Area (ha) | 26852.69 |
| Area (km2) | 268.5269 |
| MPA Overlap | D1MPA |
| MPA Type | Proposed |
| MPA Zones | GPZ-SWAP |


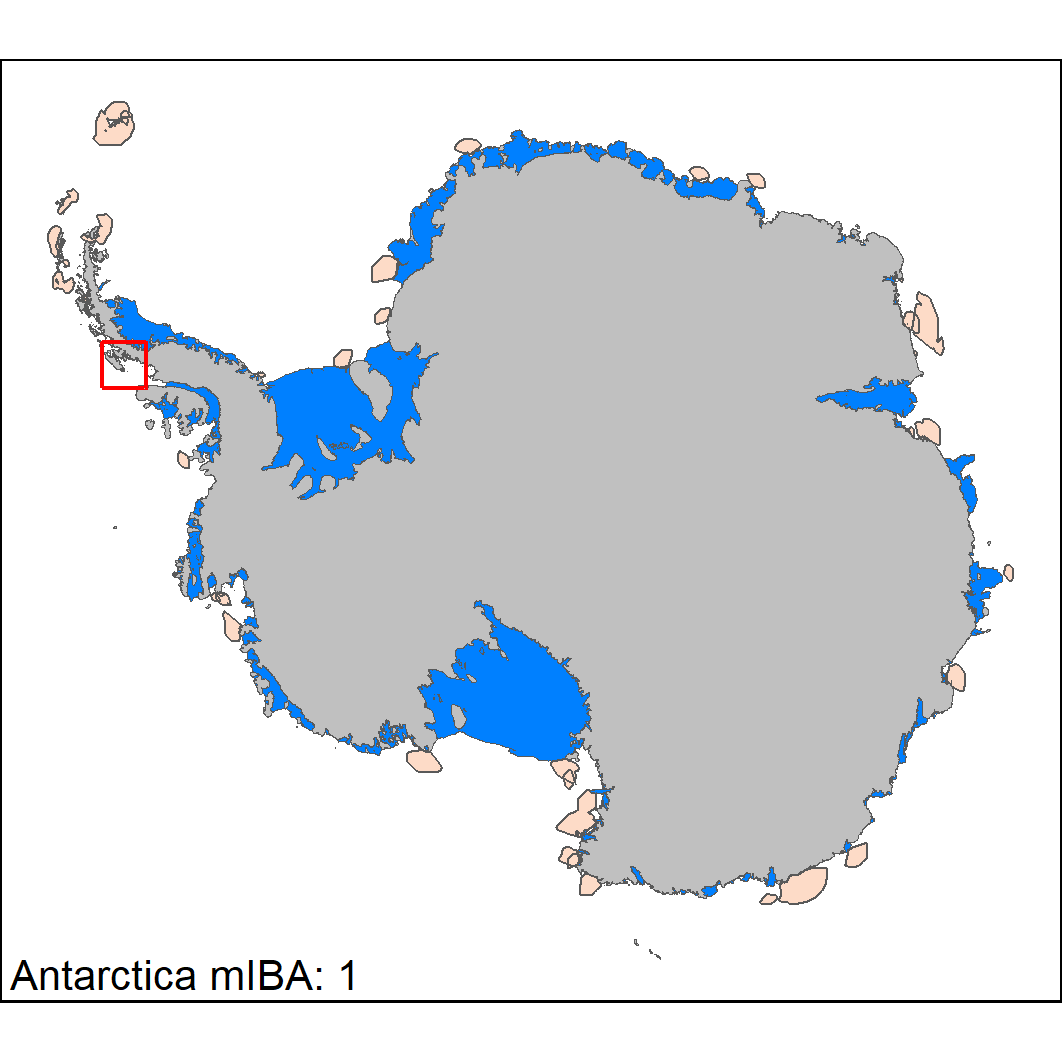


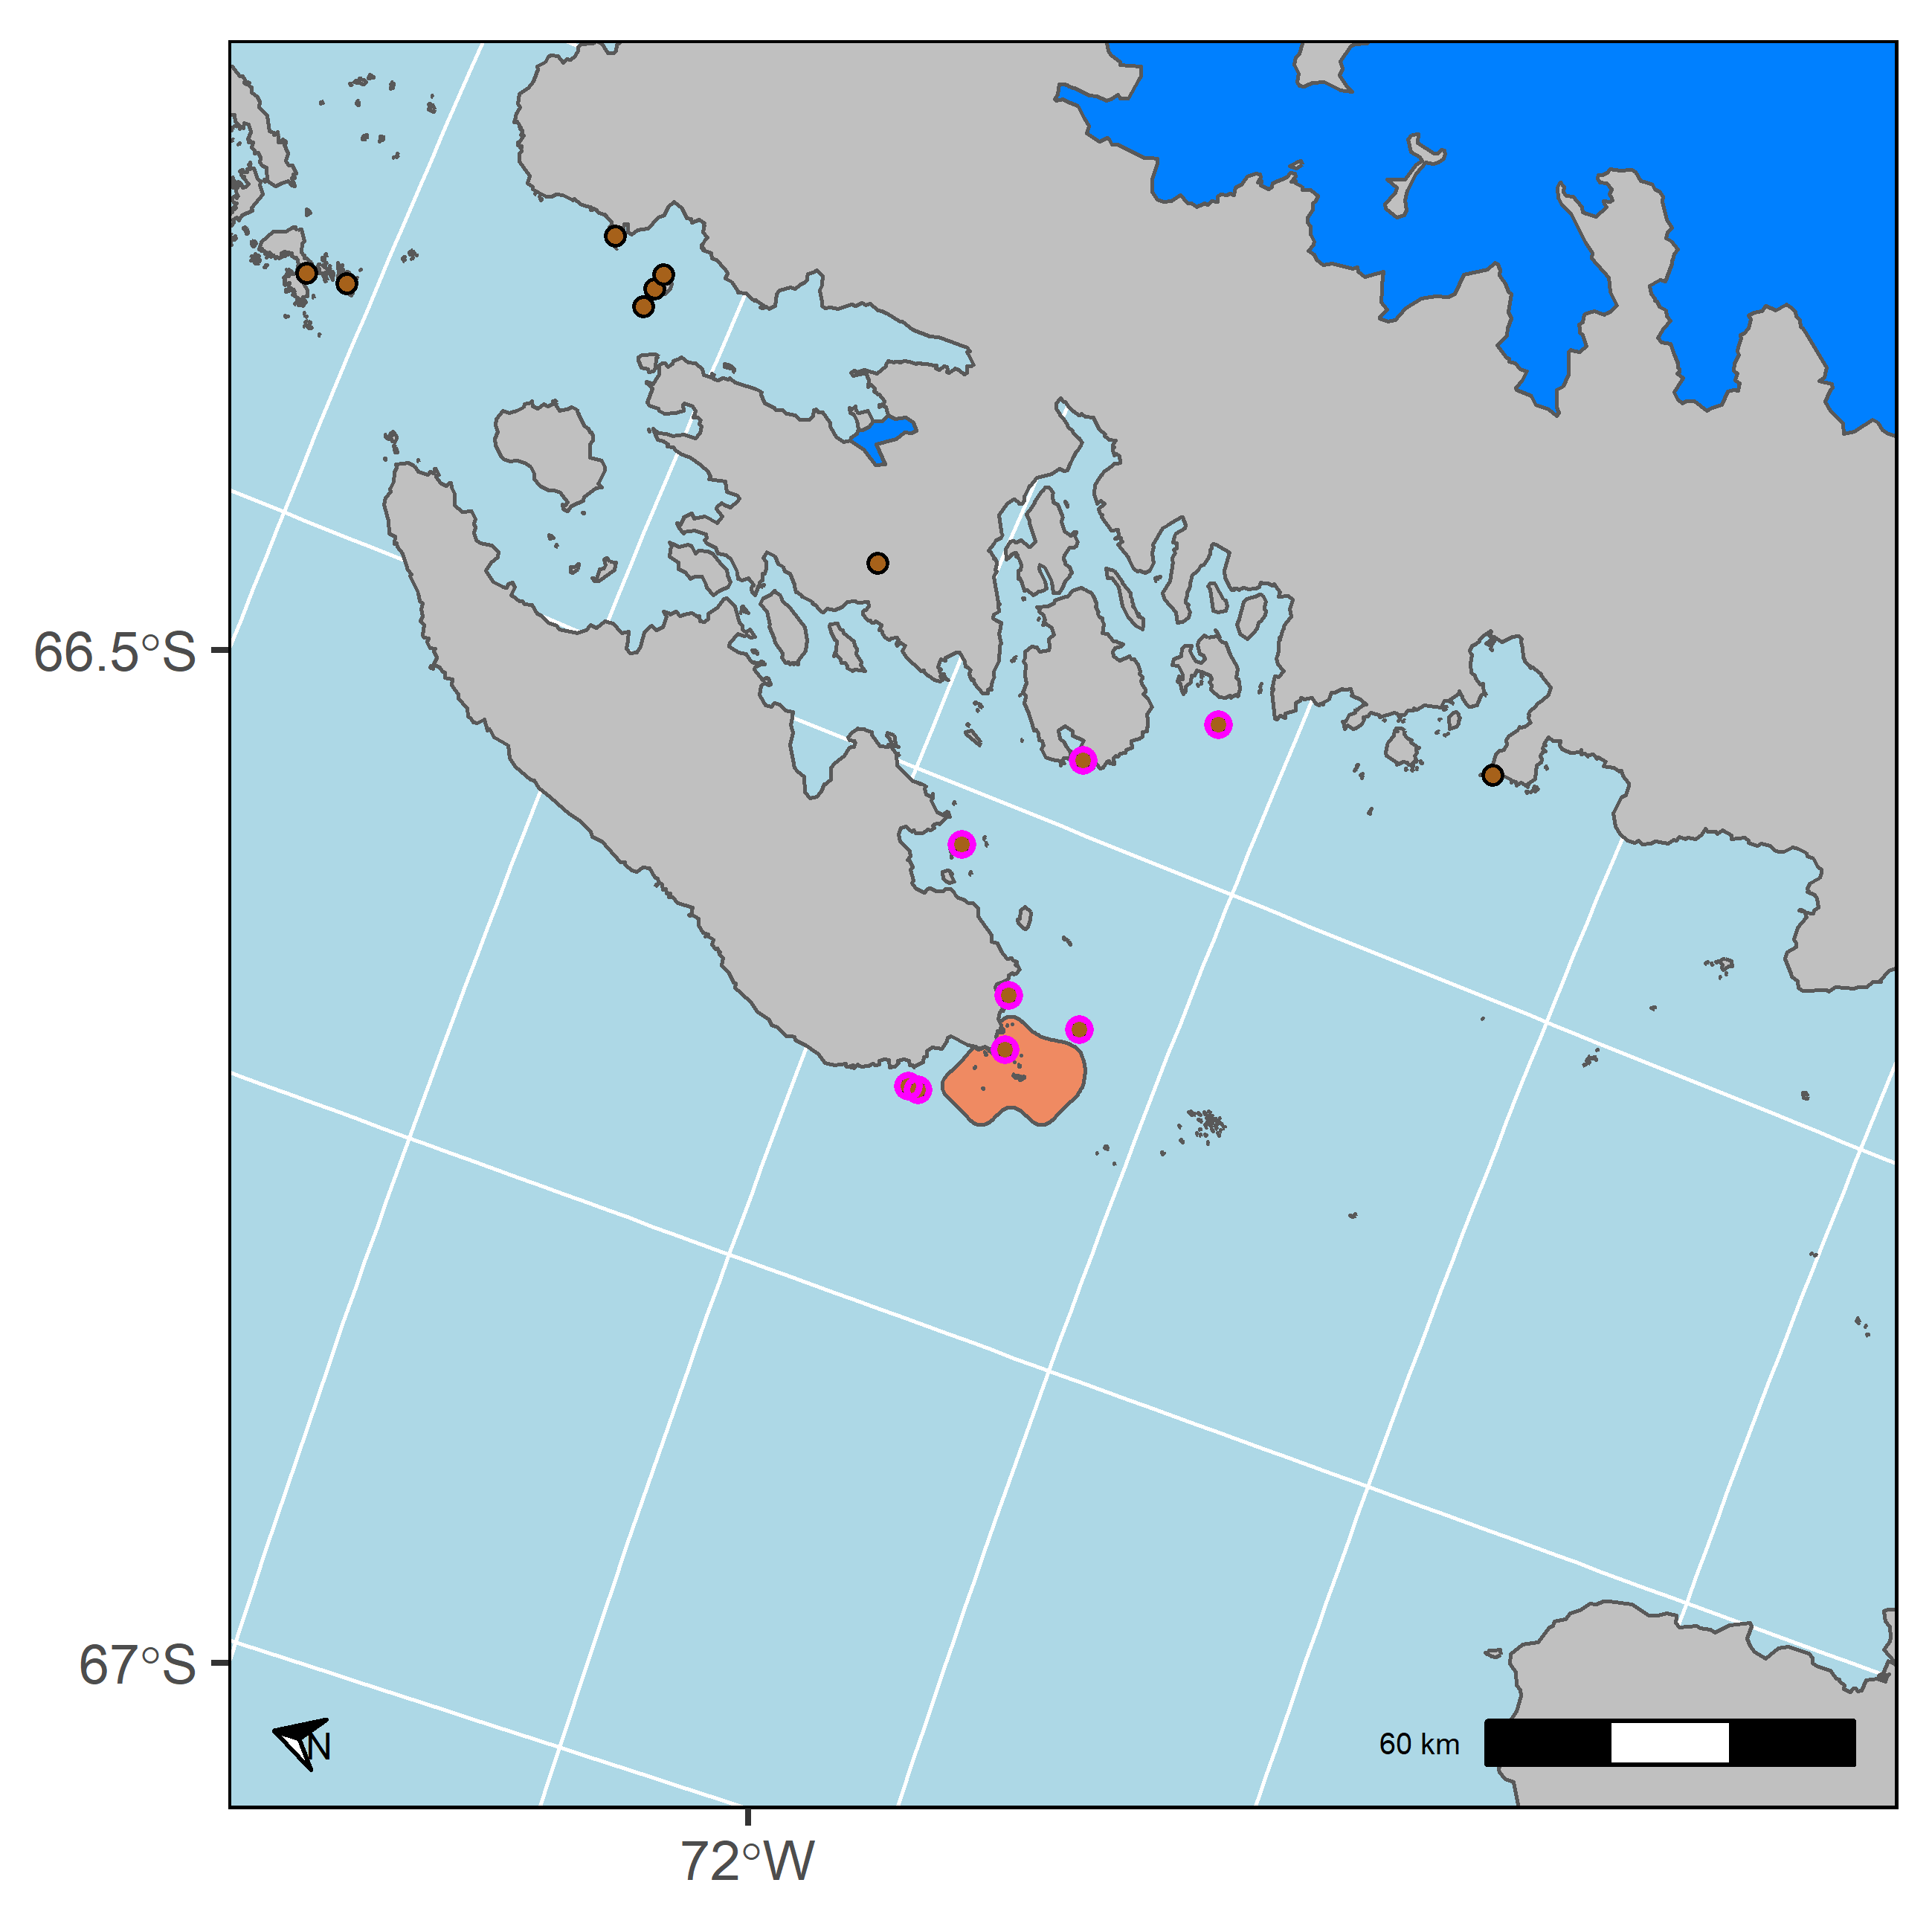


Figure A1.1: Focal Antarctica marine IBA 1 (orange polygon) for penguins, and other marine IBAs (light orange) for penguins identified during the project. Colonies circled in purple are those whose populations contributed to the marine IBA triggering IBA criteria A4 (>1% of the global population). See Table A1.2.

Table A1.1: Population estimates and count types (those that triggered IBA Criteria A4, >1% of global population) for key penguin species in Antarctic marine IBA 1. Key sources of colony input data associated with this marine IBA are detailed in Table A1.2. Population estimates refer to the lower and upper estimated number of adult breeding pairs likely to be using the marine IBA; derived from summing over all cells from individual colony density distribution surfaces which contributed to the identification of the marine IBA.

| Site code | Species | Count type | Lower | Upper |
| --- | --- | --- | --- | --- |
| 1 | ADP | max | 52087 | 79794 |
| 1 | ADP | median | 38219 | 58327 |
| 1 | ADP | recent | 51897 | 79603 |

Table A1.2: Population estimates (adult breeding pairs) and count types from individual colony(ies) density distribution surfaces which contributed to the identification of marine IBA: 1. I.e. The lower and upper estimated number of adult breeding pairs from a given colony that may utilise the marine IBA. Note, the lower population estimate represents the lowest estimated number of breeding pairs from a given colony contributing to the delineation of the marine IBA site. The lower population estimate may therefore be zero when only part of the individual colony(ies) density distribution surface contributed to the marine IBA. *The Count Year for the median population estimate indicates the number of yearly population assessments for the given colony. Colony names are given in the ‘Colony Codes’ table at the end of this document.

| Site code | Species | Colony | Count type | Lower | Upper | Count year* |
| --- | --- | --- | --- | --- | --- | --- |
| 1 | ADP | ANCH | max | 56 | 90 | 1977 |
| 1 | ADP | ANCH | median | 28 | 45 | 2 |
| 1 | ADP | AVIA | max | 49125 | 77515 | 2013 |
| 1 | ADP | AVIA | median | 35843 | 56558 | 2 |
| 1 | ADP | AVIA | recent | 49125 | 77515 | 2013 |
| 1 | ADP | BONG | max | 268 | 744 | 2008 |
| 1 | ADP | BONG | median | 213 | 591 | 4 |
| 1 | ADP | BONG | recent | 214 | 595 | 2013 |
| 1 | ADP | CHAT | max | 94 | 105 | 2013 |
| 1 | ADP | CHAT | median | 82 | 92 | 2 |
| 1 | ADP | CHAT | recent | 94 | 105 | 2013 |
| 1 | ADP | CONE | max | 1890 | 2145 | 2013 |
| 1 | ADP | CONE | median | 1875 | 2127 | 2 |
| 1 | ADP | CONE | recent | 1890 | 2145 | 2013 |
| 1 | ADP | EMPE | max | 448 | 545 | 1986 |
| 1 | ADP | EMPE | median | 448 | 545 | 1 |
| 1 | ADP | EMPE | recent | 448 | 545 | 1986 |
| 1 | ADP | GING | max | 559 | 877 | 2011 |
| 1 | ADP | GING | median | 559 | 877 | 1 |
| 1 | ADP | GING | recent | 559 | 877 | 2011 |
| 1 | ADP | LAGO | max | 267 | 1128 | 2013 |
| 1 | ADP | LAGO | median | 164 | 694 | 2 |
| 1 | ADP | LAGO | recent | 267 | 1128 | 2013 |

# Antarctica marine IBA: 2

| Site code | 2 |
| --- | --- |
| Species | GEP |
| IBA criteria | A4: Congregations |
| Decimal Latitude | -65.088 |
| Decimal Longitude | -64.258 |
| Area (ha) | 19075.57 |
| Area (km2) | 190.7557 |
| MPA Overlap | D1MPA |
| MPA Type | Proposed |
| MPA Zones | GPZ-AP |


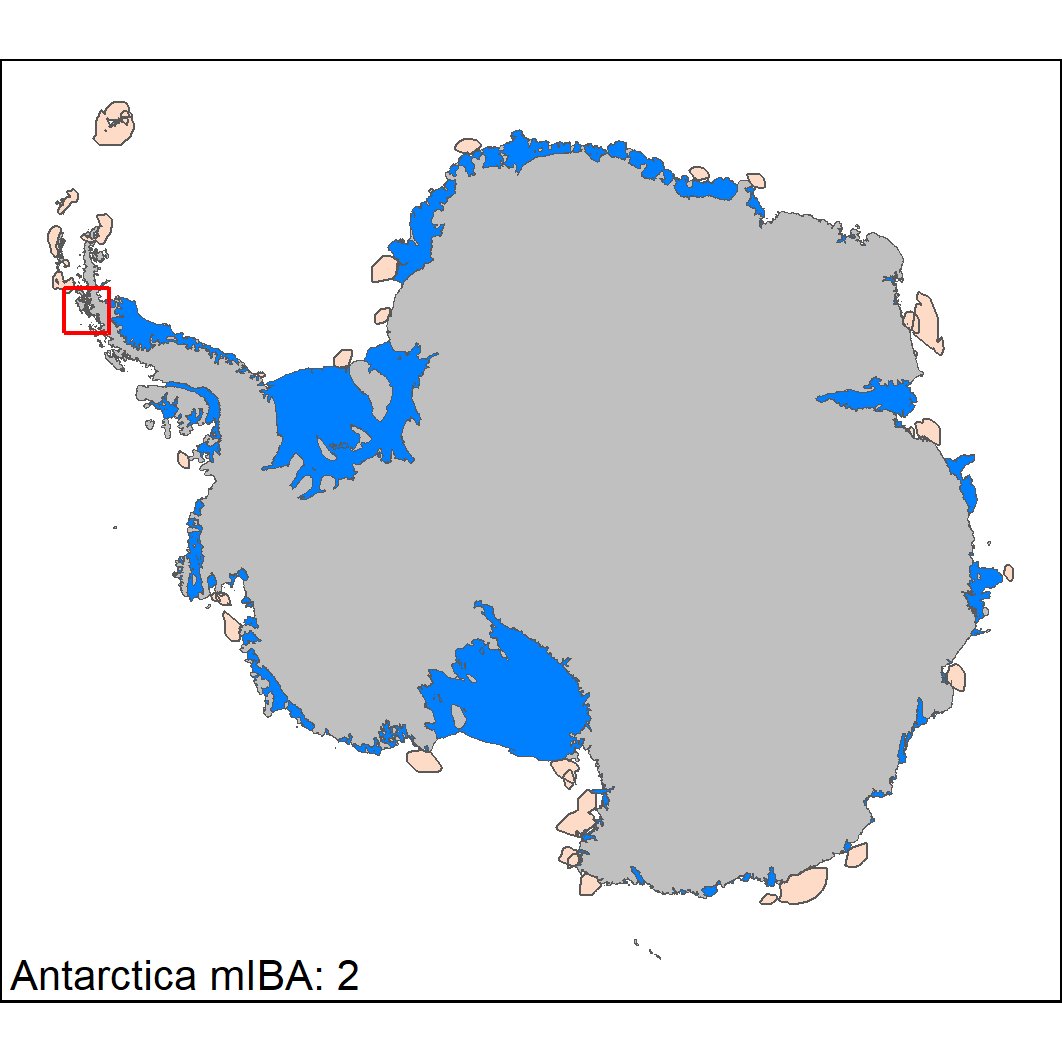


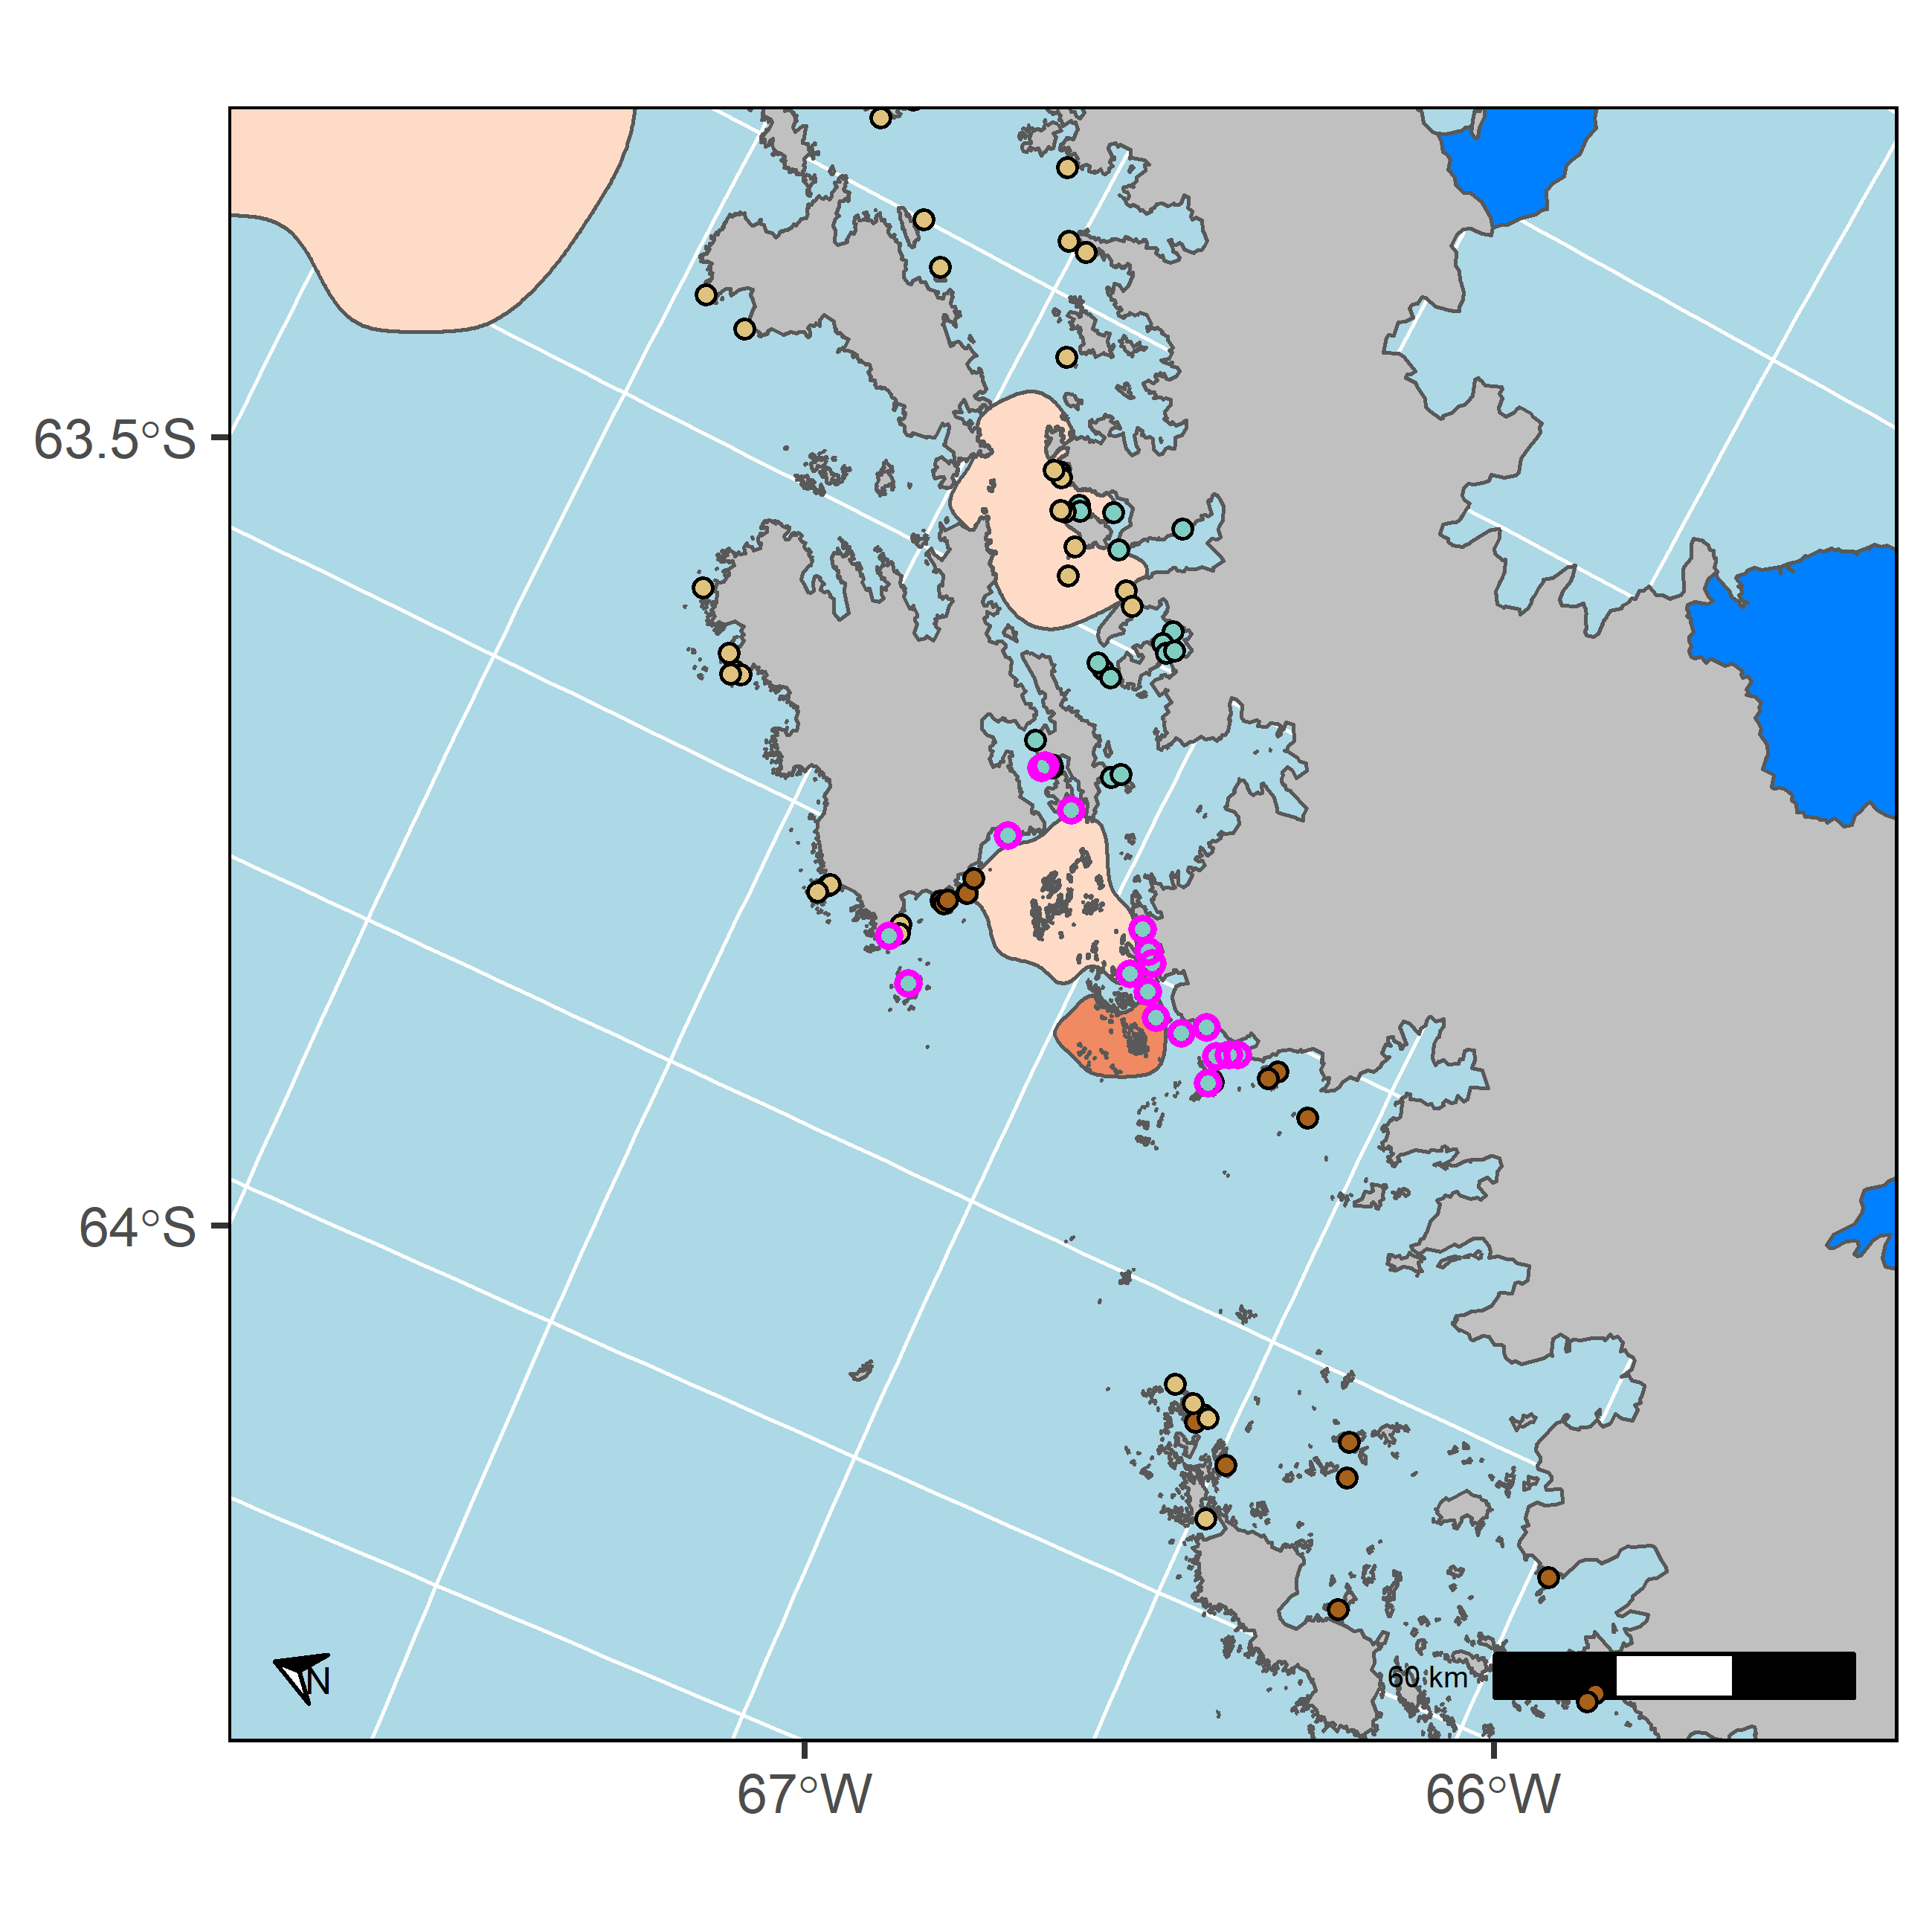


Figure A2.1: Focal Antarctica marine IBA 2 (orange polygon) for penguins, and other marine IBAs (light orange) for penguins identified during the project. Colonies circled in purple are those whose populations contributed to the marine IBA triggering IBA criteria A4 (>1% of the global population). See Table A2.2.

Table A2.1: Population estimates and count types (those that triggered IBA Criteria A4, >1% of global population) for key penguin species in Antarctic marine IBA 2. Key sources of colony input data associated with this marine IBA are detailed in Table A2.2. Population estimates refer to the lower and upper estimated number of adult breeding pairs likely to be using the marine IBA; derived from summing over all cells from individual colony density distribution surfaces which contributed to the identification of the marine IBA.

| Site code | Species | Count type | Lower | Upper |
| --- | --- | --- | --- | --- |
| 2 | GEP | max | 5570 | 7620 |
| 2 | GEP | median | 4164 | 5845 |
| 2 | GEP | recent | 5217 | 7037 |

Table A2.2: Population estimates (adult breeding pairs) and count types from individual colony(ies) density distribution surfaces which contributed to the identification of marine IBA: 2. I.e. The lower and upper estimated number of adult breeding pairs from a given colony that may utilise the marine IBA. Note, the lower population estimate represents the lowest estimated number of breeding pairs from a given colony contributing to the delineation of the marine IBA site. The lower population estimate may therefore be zero when only part of the individual colony(ies) density distribution surface contributed to the marine IBA. *The Count Year for the median population estimate indicates the number of yearly population assessments for the given colony. Colony names are given in the ‘Colony Codes’ table at the end of this document.

| Site code | Species | Colony | Count type | Lower | Upper | Count year* |
| --- | --- | --- | --- | --- | --- | --- |
| 2 | GEP | BISC | max | 0 | 700 | 2012 |
| 2 | GEP | BISC | median | 0 | 102 | 18 |
| 2 | GEP | BISC | recent | 0 | 700 | 2012 |
| 2 | GEP | DAMO | max | 170 | 171 | 2014 |
| 2 | GEP | DAMO | median | 136 | 137 | 20 |
| 2 | GEP | DAMO | recent | 101 | 102 | 2019 |
| 2 | GEP | DOBE | max | 12 | 12 | 2016 |
| 2 | GEP | DOBE | median | 11 | 11 | 12 |
| 2 | GEP | DOBE | recent | 10 | 10 | 2019 |
| 2 | GEP | GLAN | max | 83 | 143 | 2015 |
| 2 | GEP | GLAN | median | 48 | 83 | 6 |
| 2 | GEP | GLAN | recent | 83 | 143 | 2015 |
| 2 | GEP | HOVG | max | 1256 | 2557 | 2018 |
| 2 | GEP | HOVG | median | 1256 | 2557 | 1 |
| 2 | GEP | HOVG | recent | 1256 | 2557 | 2018 |
| 2 | GEP | HUMP | max | 100 | 182 | 2008 |
| 2 | GEP | HUMP | median | 13 | 23 | 7 |
| 2 | GEP | HUMP | recent | 15 | 26 | 2015 |
| 2 | GEP | JOUB | max | 0 | 30 | 1990 |
| 2 | GEP | JOUB | median | 0 | 17 | 4 |
| 2 | GEP | JOUB | recent | 0 | 30 | 1990 |
| 2 | GEP | LOUB | max | 203 | 353 | 2008 |
| 2 | GEP | LOUB | median | 131 | 228 | 4 |
| 2 | GEP | LOUB | recent | 154 | 268 | 2013 |
| 2 | GEP | MONA | max | 0 | 239 | 1979 |
| 2 | GEP | MONA | median | 0 | 239 | 1 |
| 2 | GEP | MONA | recent | 0 | 239 | 1979 |
| 2 | GEP | MOOT | max | 151 | 331 | 2015 |
| 2 | GEP | MOOT | median | 94 | 206 | 8 |
| 2 | GEP | MOOT | recent | 151 | 331 | 2015 |
| 2 | GEP | PCHA | max | 794 | 1201 | 2009 |
| 2 | GEP | PCHA | median | 494 | 748 | 12 |
| 2 | GEP | PCHA | recent | 603 | 912 | 2018 |
| 2 | GEP | PETE | max | 952 | 1700 | 2013 |
| 2 | GEP | PETE | median | 727 | 1298 | 13 |
| 2 | GEP | PETE | recent | 940 | 1679 | 2018 |
| 2 | GEP | PLEN | max | 1577 | 3246 | 2013 |
| 2 | GEP | PLEN | median | 1105 | 2276 | 16 |
| 2 | GEP | PLEN | recent | 1470 | 3027 | 2018 |
| 2 | GEP | PYPT | max | 0 | 330 | 2009 |
| 2 | GEP | PYPT | median | 0 | 277 | 3 |
| 2 | GEP | PYPT | recent | 0 | 277 | 2010 |
| 2 | GEP | TUXE | max | 94 | 157 | 2015 |
| 2 | GEP | TUXE | median | 80 | 134 | 4 |
| 2 | GEP | TUXE | recent | 83 | 139 | 2016 |
| 2 | GEP | TXRX | max | 6 | 9 | 2014 |
| 2 | GEP | TXRX | median | 6 | 9 | 1 |
| 2 | GEP | TXRX | recent | 6 | 9 | 2014 |
| 2 | GEP | VERN | max | 65 | 144 | 2015 |
| 2 | GEP | VERN | median | 14 | 31 | 5 |
| 2 | GEP | VERN | recent | 65 | 144 | 2015 |
| 2 | GEP | YALO | max | 11 | 17 | 2013 |
| 2 | GEP | YALO | median | 8 | 12 | 4 |
| 2 | GEP | YALO | recent | 11 | 17 | 2013 |

# Antarctica marine IBA: 3

| Site code | 3 |
| --- | --- |
| Species | GEP |
| IBA criteria | A4: Congregations |
| Decimal Latitude | -64.924 |
| Decimal Longitude | -63.914 |
| Area (ha) | 53007.71 |
| Area (km2) | 530.0771 |
| MPA Overlap | D1MPA |
| MPA Type | Proposed |
| MPA Zones | GPZ-AP |


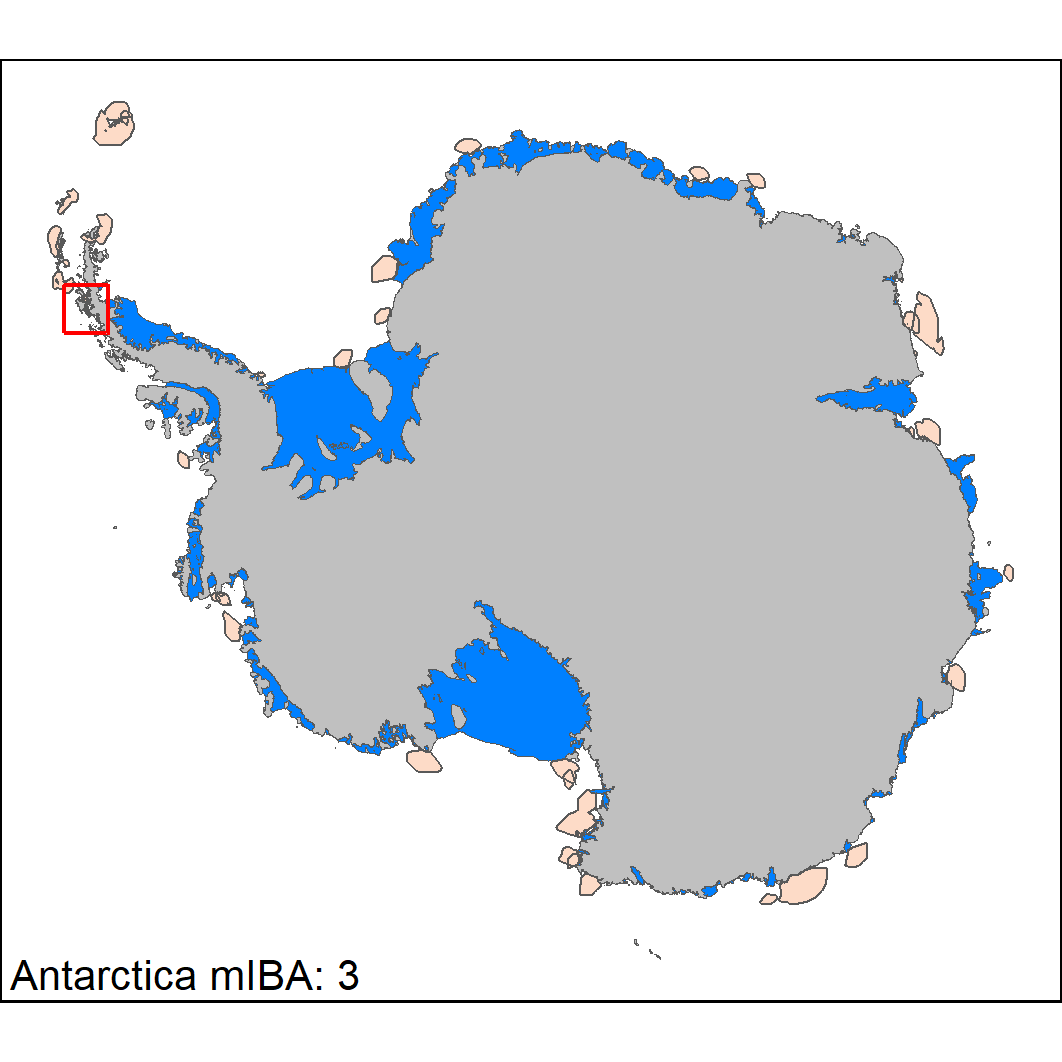


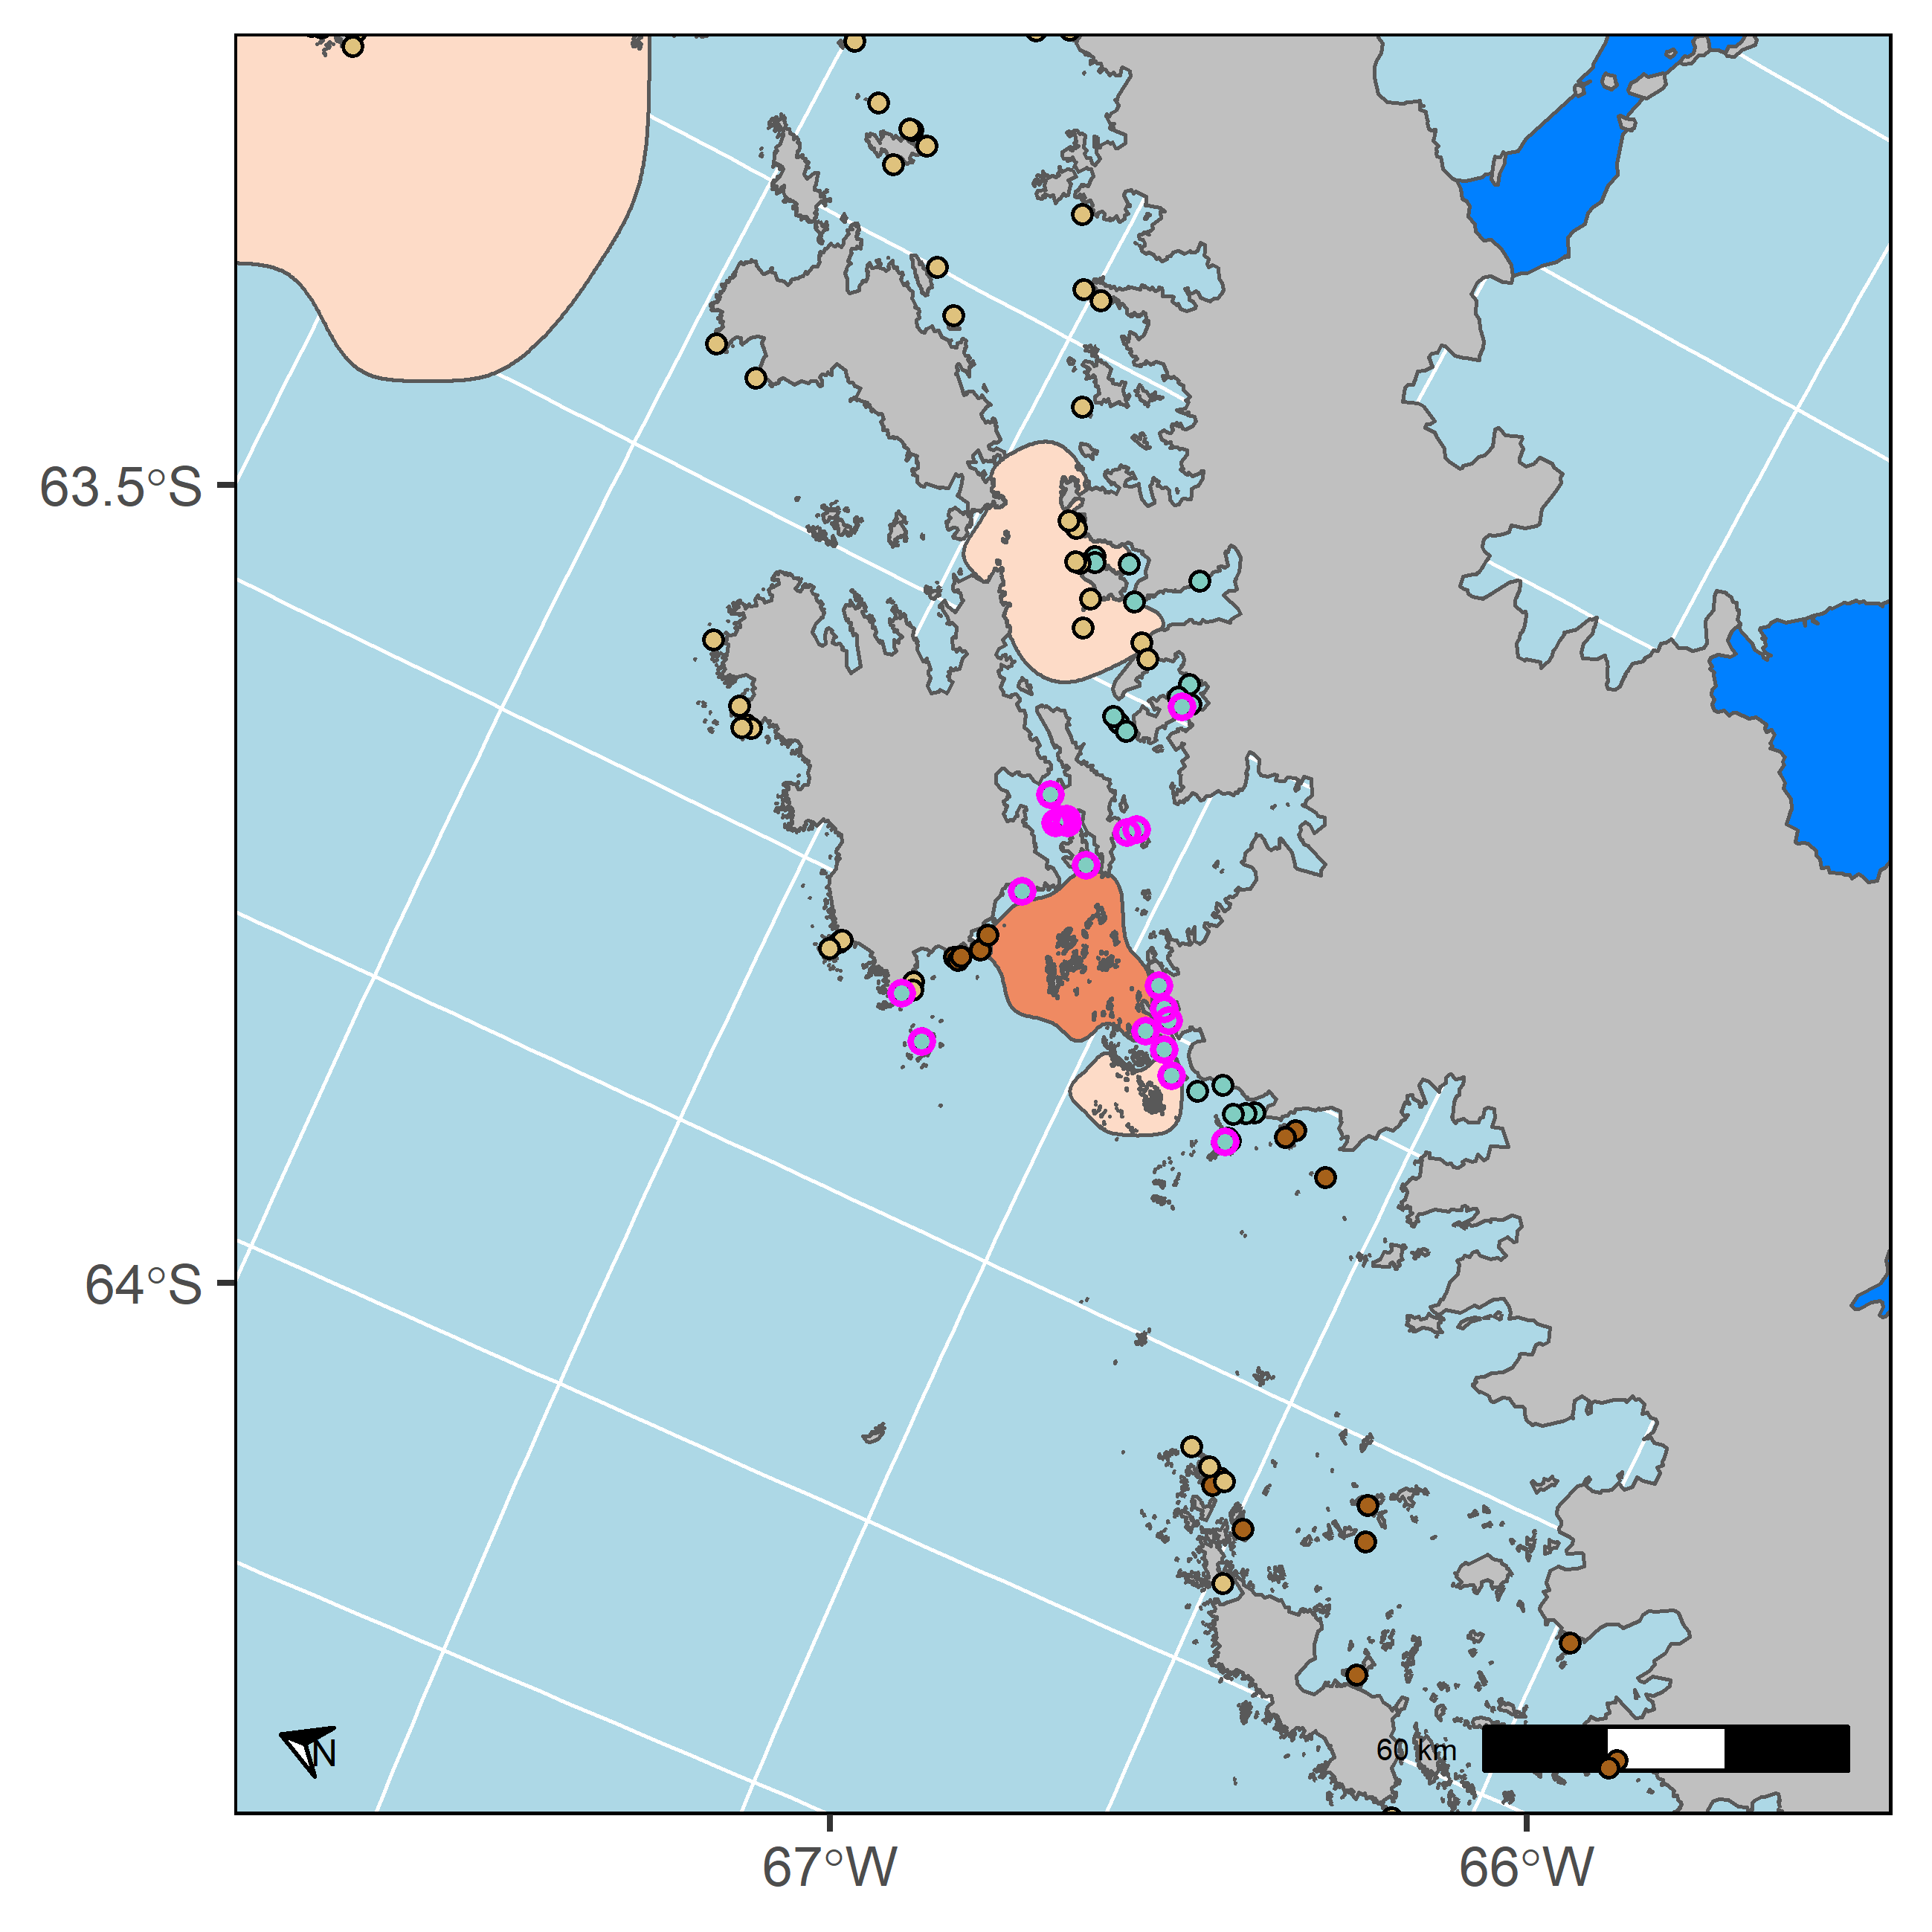


Figure A3.1: Focal Antarctica marine IBA 3 (orange polygon) for penguins, and other marine IBAs (light orange) for penguins identified during the project. Colonies circled in purple are those whose populations contributed to the marine IBA triggering IBA criteria A4 (>1% of the global population). See Table A3.2.

Table A3.1: Population estimates and count types (those that triggered IBA Criteria A4, >1% of global population) for key penguin species in Antarctic marine IBA 3. Key sources of colony input data associated with this marine IBA are detailed in Table A3.2. Population estimates refer to the lower and upper estimated number of adult breeding pairs likely to be using the marine IBA; derived from summing over all cells from individual colony density distribution surfaces which contributed to the identification of the marine IBA.

| Site code | Species | Count type | Lower | Upper |
| --- | --- | --- | --- | --- |
| 3 | GEP | max | 5633 | 9474 |
| 3 | GEP | median | 3960 | 6334 |
| 3 | GEP | recent | 4156 | 7772 |

Table A3.2: Population estimates (adult breeding pairs) and count types from individual colony(ies) density distribution surfaces which contributed to the identification of marine IBA: 3. I.e. The lower and upper estimated number of adult breeding pairs from a given colony that may utilise the marine IBA. Note, the lower population estimate represents the lowest estimated number of breeding pairs from a given colony contributing to the delineation of the marine IBA site. The lower population estimate may therefore be zero when only part of the individual colony(ies) density distribution surface contributed to the marine IBA. *The Count Year for the median population estimate indicates the number of yearly population assessments for the given colony. Colony names are given in the ‘Colony Codes’ table at the end of this document.

| Site code | Species | Colony | Count type | Lower | Upper | Count year* |
| --- | --- | --- | --- | --- | --- | --- |
| 3 | GEP | BISC | max | 704 | 2319 | 2012 |
| 3 | GEP | BISC | median | 103 | 339 | 18 |
| 3 | GEP | BISC | recent | 704 | 2319 | 2012 |
| 3 | GEP | BRYS | max | 0 | 235 | 2008 |
| 3 | GEP | BRYS | median | 0 | 196 | 11 |
| 3 | GEP | BRYS | recent | 0 | 146 | 2019 |
| 3 | GEP | DAMO | max | 295 | 1612 | 2014 |
| 3 | GEP | DAMO | median | 236 | 1289 | 20 |
| 3 | GEP | DAMO | recent | 175 | 956 | 2019 |
| 3 | GEP | DOBE | max | 21 | 118 | 2016 |
| 3 | GEP | DOBE | median | 19 | 105 | 12 |
| 3 | GEP | DOBE | recent | 18 | 96 | 2019 |
| 3 | GEP | GLAN | max | 46 | 147 | 2015 |
| 3 | GEP | GLAN | median | 27 | 85 | 6 |
| 3 | GEP | GLAN | recent | 46 | 147 | 2015 |
| 3 | GEP | HOVG | max | 301 | 1680 | 2018 |
| 3 | GEP | HOVG | median | 301 | 1680 | 1 |
| 3 | GEP | HOVG | recent | 301 | 1680 | 2018 |
| 3 | GEP | HUMP | max | 98 | 317 | 2008 |
| 3 | GEP | HUMP | median | 12 | 40 | 7 |
| 3 | GEP | HUMP | recent | 14 | 46 | 2015 |
| 3 | GEP | JOUB | max | 7 | 50 | 1990 |
| 3 | GEP | JOUB | median | 4 | 28 | 4 |
| 3 | GEP | JOUB | recent | 7 | 50 | 1990 |
| 3 | GEP | JOUG | max | 129 | 1191 | 2001 |
| 3 | GEP | JOUG | median | 91 | 833 | 25 |
| 3 | GEP | JOUG | recent | 67 | 618 | 2018 |
| 3 | GEP | LOCK | max | 62 | 570 | 2000 |
| 3 | GEP | LOCK | median | 44 | 405 | 19 |
| 3 | GEP | LOCK | recent | 38 | 344 | 2016 |
| 3 | GEP | LOUB | max | 114 | 523 | 2008 |
| 3 | GEP | LOUB | median | 74 | 338 | 4 |
| 3 | GEP | LOUB | recent | 87 | 397 | 2013 |
| 3 | GEP | MONA | max | 0 | 437 | 1979 |
| 3 | GEP | MONA | median | 0 | 437 | 1 |
| 3 | GEP | MONA | recent | 0 | 437 | 1979 |
| 3 | GEP | NOBL | max | 3 | 10 | 2019 |
| 3 | GEP | NOBL | median | 3 | 8 | 4 |
| 3 | GEP | NOBL | recent | 3 | 10 | 2019 |
| 3 | GEP | PCHA | max | 434 | 1954 | 2009 |
| 3 | GEP | PCHA | median | 270 | 1216 | 12 |
| 3 | GEP | PCHA | recent | 329 | 1484 | 2018 |
| 3 | GEP | PLEN | max | 382 | 2252 | 2013 |
| 3 | GEP | PLEN | median | 268 | 1579 | 16 |
| 3 | GEP | PLEN | recent | 356 | 2100 | 2018 |
| 3 | GEP | PRIN | max | 39 | 369 | 2013 |
| 3 | GEP | PRIN | median | 26 | 250 | 2 |
| 3 | GEP | PRIN | recent | 39 | 369 | 2013 |
| 3 | GEP | PYPT | max | 472 | 2220 | 2009 |
| 3 | GEP | PYPT | median | 397 | 1865 | 3 |
| 3 | GEP | PYPT | recent | 397 | 1865 | 2010 |
| 3 | GEP | TRUA | max | 55 | 511 | 2013 |
| 3 | GEP | TRUA | median | 55 | 511 | 1 |
| 3 | GEP | TRUA | recent | 55 | 511 | 2013 |
| 3 | GEP | VERN | max | 15 | 66 | 2015 |
| 3 | GEP | VERN | median | 3 | 14 | 5 |
| 3 | GEP | VERN | recent | 15 | 66 | 2015 |

# Antarctica marine IBA: 4

| Site code | 4 |
| --- | --- |
| Species | GEP |
| IBA criteria | A4: Congregations |
| Decimal Latitude | -64.64 |
| Decimal Longitude | -62.735 |
| Area (ha) | 71816.82 |
| Area (km2) | 718.1682 |
| MPA Overlap | D1MPA |
| MPA Type | Proposed |
| MPA Zones | GPZ-AP |


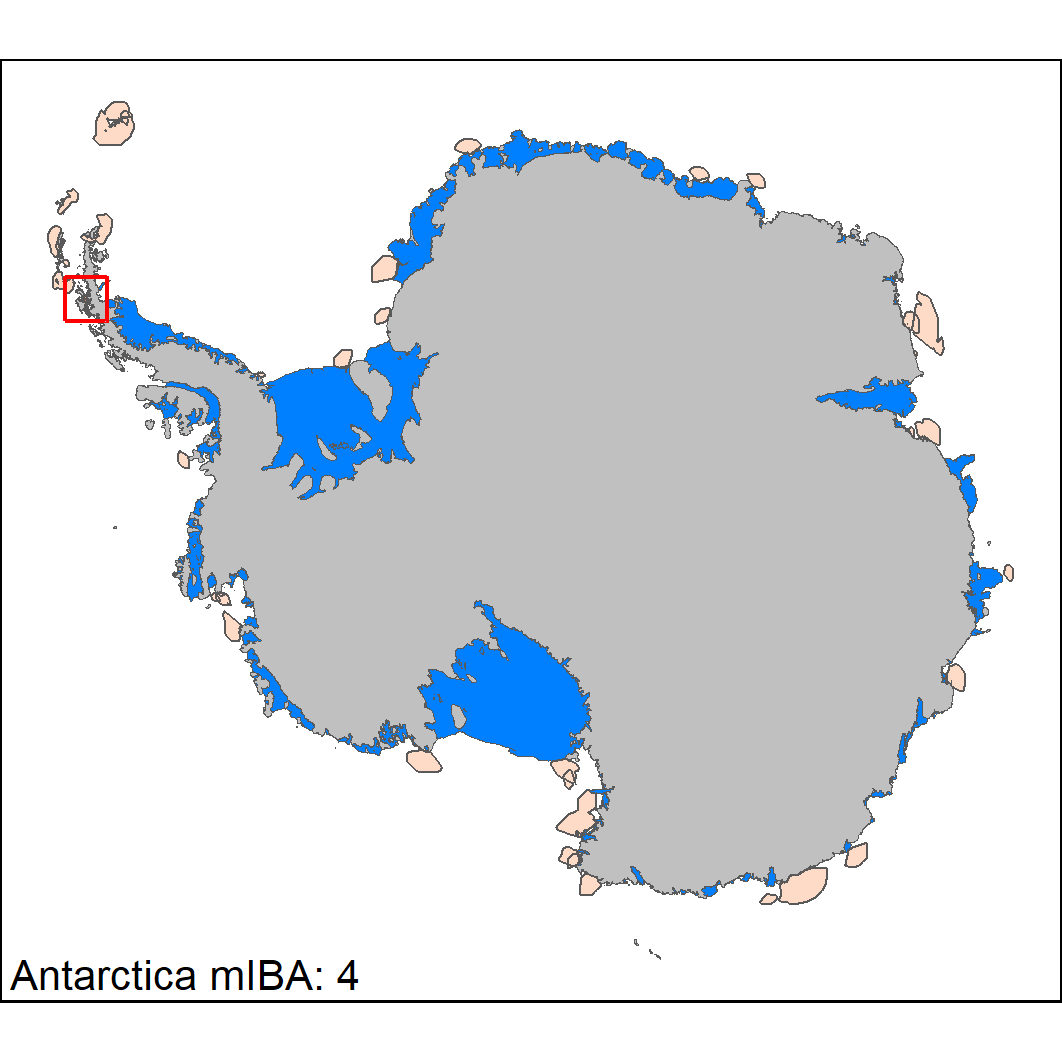


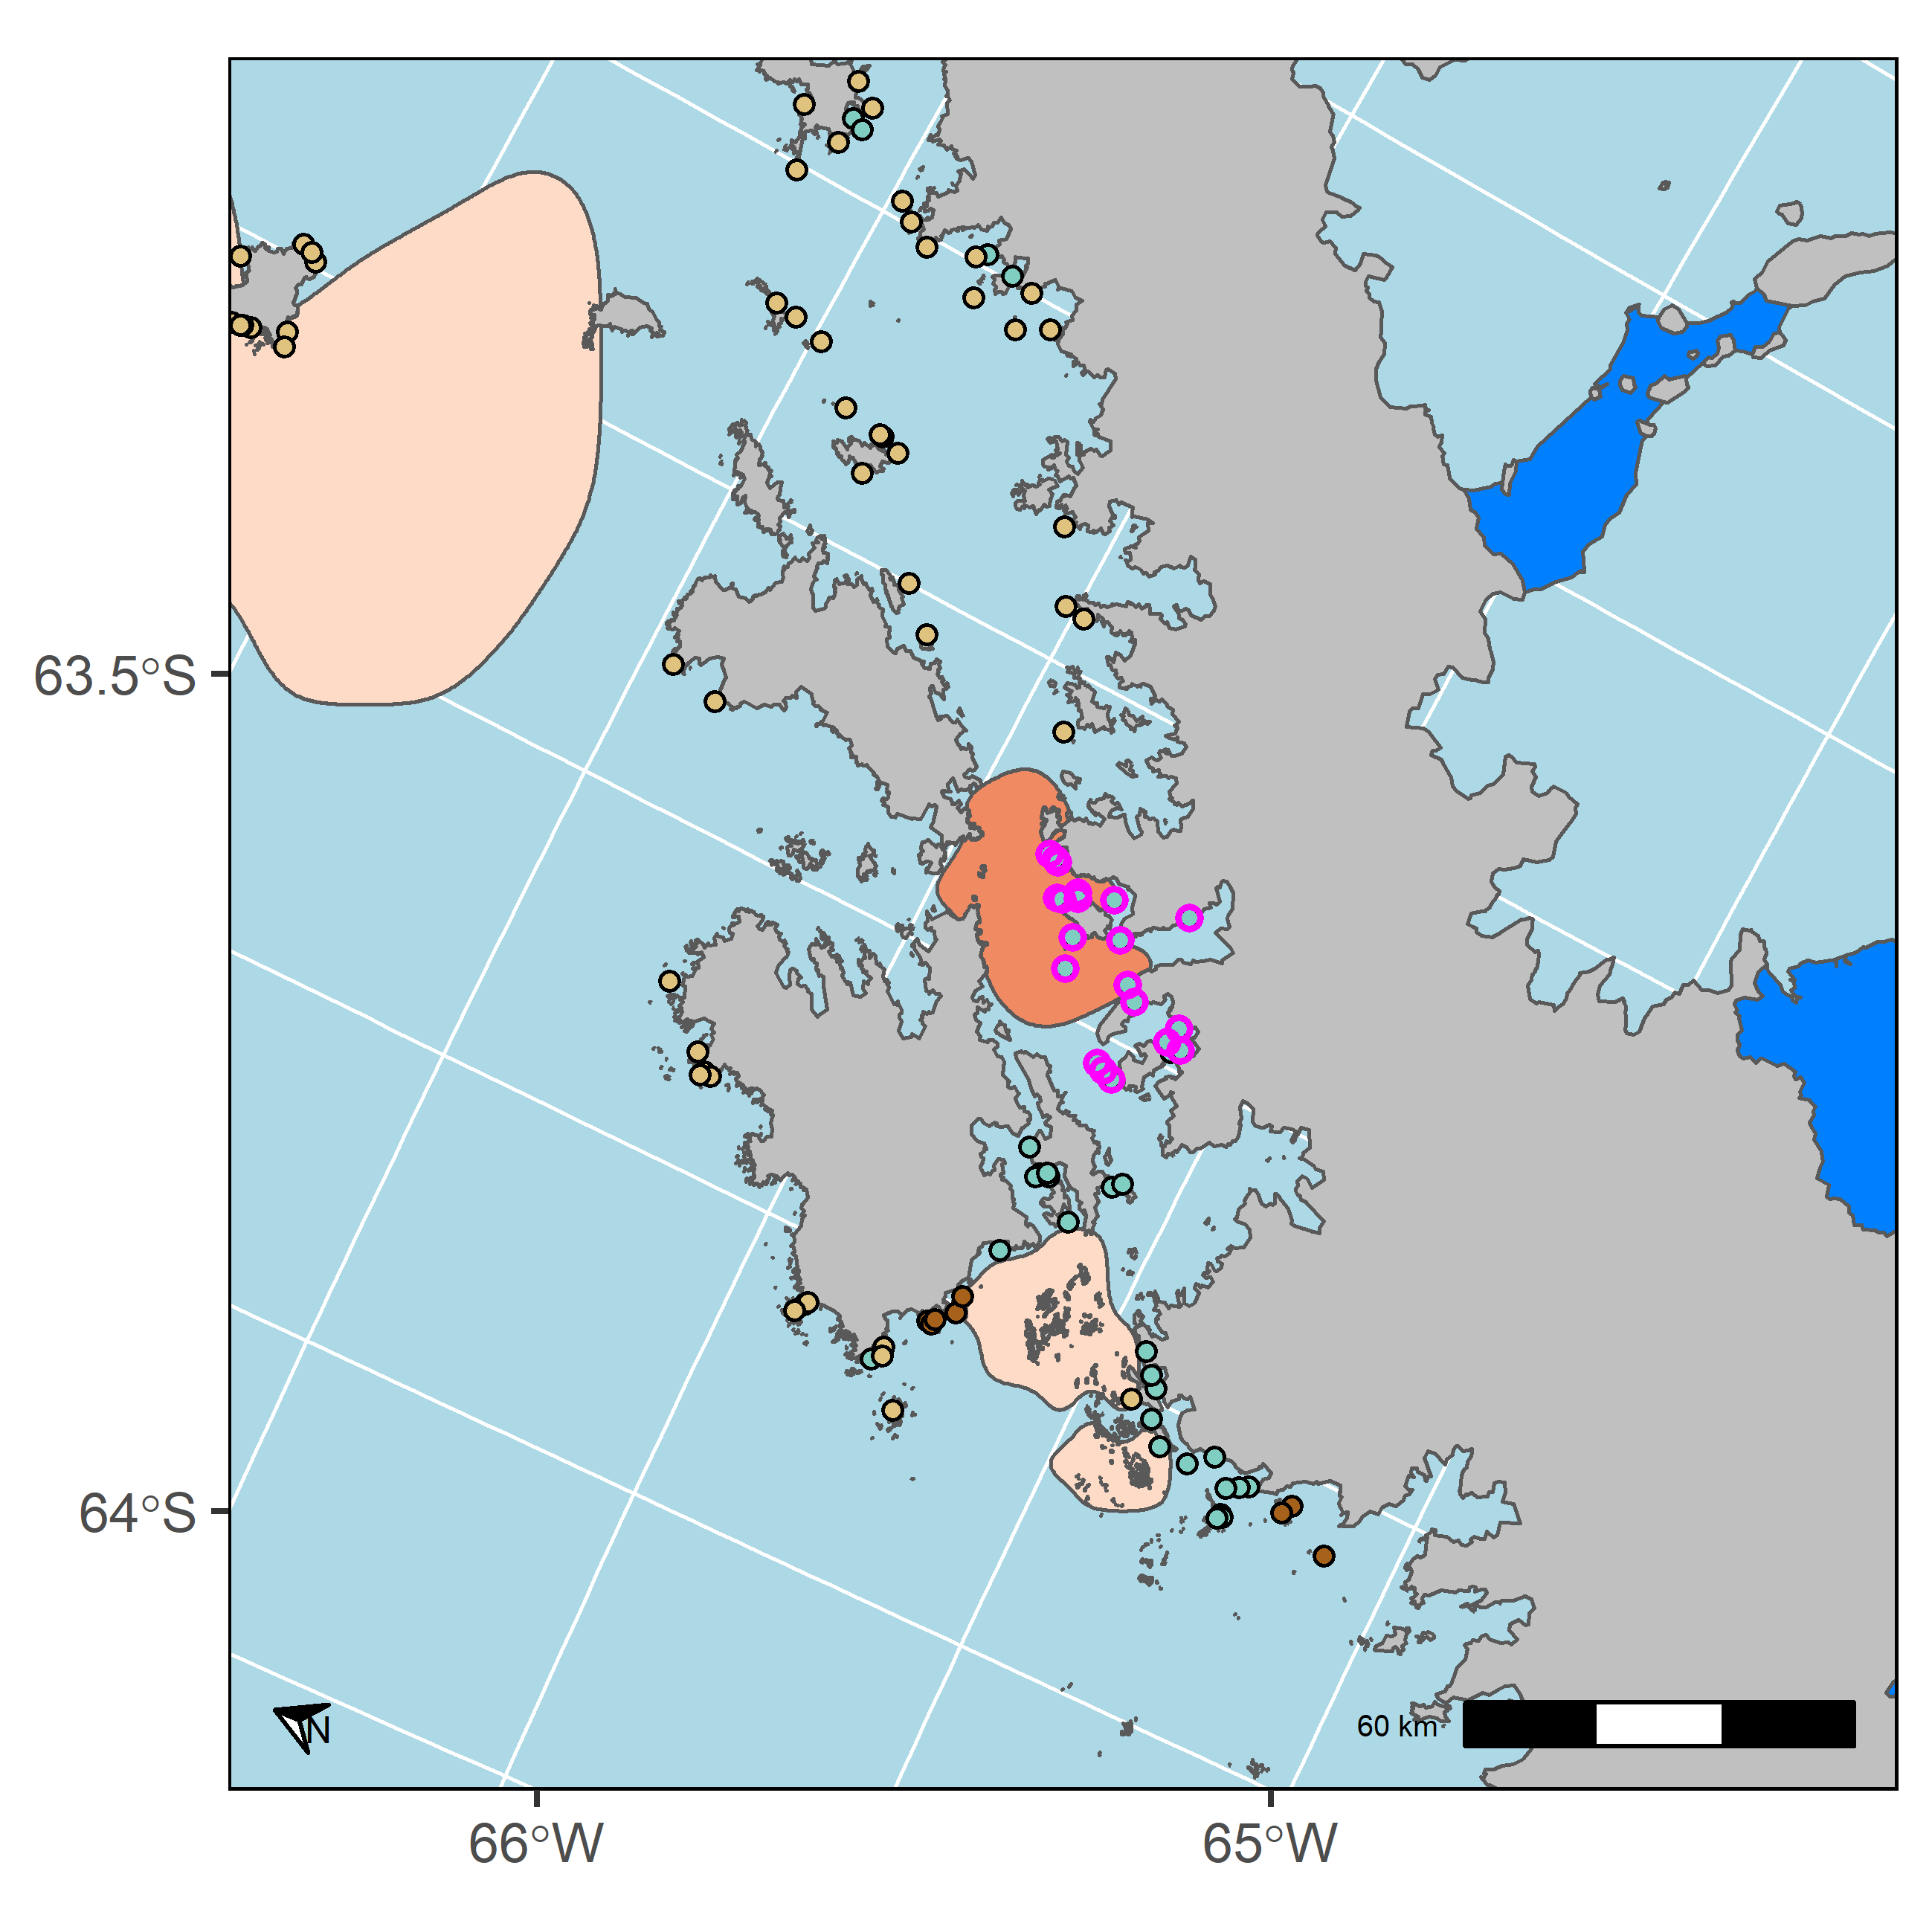


Figure A4.1: Focal Antarctica marine IBA 4 (orange polygon) for penguins, and other marine IBAs (light orange) for penguins identified during the project. Colonies circled in purple are those whose populations contributed to the marine IBA triggering IBA criteria A4 (>1% of the global population). See Table A4.2.

Table A4.1: Population estimates and count types (those that triggered IBA Criteria A4, >1% of global population) for key penguin species in Antarctic marine IBA 4. Key sources of colony input data associated with this marine IBA are detailed in Table A4.2. Population estimates refer to the lower and upper estimated number of adult breeding pairs likely to be using the marine IBA; derived from summing over all cells from individual colony density distribution surfaces which contributed to the identification of the marine IBA.

| Site code | Species | Count type | Lower | Upper |
| --- | --- | --- | --- | --- |
| 4 | GEP | max | 6250 | 19983 |
| 4 | GEP | median | 4157 | 13273 |
| 4 | GEP | recent | 4674 | 14866 |

Table A4.2: Population estimates (adult breeding pairs) and count types from individual colony(ies) density distribution surfaces which contributed to the identification of marine IBA: 4. I.e. The lower and upper estimated number of adult breeding pairs from a given colony that may utilise the marine IBA. Note, the lower population estimate represents the lowest estimated number of breeding pairs from a given colony contributing to the delineation of the marine IBA site. The lower population estimate may therefore be zero when only part of the individual colony(ies) density distribution surface contributed to the marine IBA. *The Count Year for the median population estimate indicates the number of yearly population assessments for the given colony. Colony names are given in the ‘Colony Codes’ table at the end of this document.

| Site code | Species | Colony | Count type | Lower | Upper | Count year* |
| --- | --- | --- | --- | --- | --- | --- |
| 4 | GEP | ALMI | max | 0 | 127 | 2014 |
| 4 | GEP | ALMI | median | 0 | 107 | 14 |
| 4 | GEP | ALMI | recent | 0 | 102 | 2019 |
| 4 | GEP | BENE | max | 313 | 1073 | 2015 |
| 4 | GEP | BENE | median | 214 | 734 | 6 |
| 4 | GEP | BENE | recent | 313 | 1073 | 2015 |
| 4 | GEP | BRYE | max | 0 | 407 | 2015 |
| 4 | GEP | BRYE | median | 0 | 361 | 13 |
| 4 | GEP | BRYE | recent | 0 | 345 | 2019 |
| 4 | GEP | CUVE | max | 2863 | 9648 | 2015 |
| 4 | GEP | CUVE | median | 1822 | 6142 | 16 |
| 4 | GEP | CUVE | recent | 2048 | 6903 | 2018 |
| 4 | GEP | DANC | max | 595 | 3632 | 2009 |
| 4 | GEP | DANC | median | 429 | 2623 | 15 |
| 4 | GEP | DANC | recent | 429 | 2623 | 2018 |
| 4 | GEP | DUPT | max | 30 | 485 | 2010 |
| 4 | GEP | DUPT | median | 20 | 322 | 4 |
| 4 | GEP | DUPT | recent | 22 | 354 | 2018 |
| 4 | GEP | GEOR | max | 1206 | 3949 | 2016 |
| 4 | GEP | GEOR | median | 735 | 2408 | 15 |
| 4 | GEP | GEOR | recent | 703 | 2301 | 2019 |
| 4 | GEP | KETL | max | 59 | 200 | 1986 |
| 4 | GEP | KETL | median | 59 | 200 | 1 |
| 4 | GEP | KETL | recent | 59 | 200 | 1986 |
| 4 | GEP | LAUT | max | 0 | 137 | 2010 |
| 4 | GEP | LAUT | median | 0 | 137 | 1 |
| 4 | GEP | LAUT | recent | 0 | 137 | 2010 |
| 4 | GEP | NEKO | max | 0 | 1024 | 2014 |
| 4 | GEP | NEKO | median | 0 | 724 | 19 |
| 4 | GEP | NEKO | recent | 0 | 653 | 2019 |
| 4 | GEP | ONEI | max | 0 | 218 | 2013 |
| 4 | GEP | ONEI | median | 0 | 157 | 4 |
| 4 | GEP | ONEI | recent | 0 | 173 | 2019 |
| 4 | GEP | ORNE | max | 145 | 483 | 2016 |
| 4 | GEP | ORNE | median | 42 | 141 | 11 |
| 4 | GEP | ORNE | recent | 121 | 401 | 2019 |
| 4 | GEP | PABE | max | 0 | 1 | 2006 |
| 4 | GEP | PABE | median | 0 | 1 | 2 |
| 4 | GEP | RONE | max | 136 | 458 | 2015 |
| 4 | GEP | RONE | median | 97 | 328 | 11 |
| 4 | GEP | RONE | recent | 131 | 441 | 2019 |
| 4 | GEP | SANE | max | 0 | 122 | 2010 |
| 4 | GEP | SANE | median | 0 | 83 | 3 |
| 4 | GEP | SANE | recent | 0 | 83 | 2019 |
| 4 | GEP | SELV | max | 137 | 737 | 2015 |
| 4 | GEP | SELV | median | 88 | 472 | 11 |
| 4 | GEP | SELV | recent | 66 | 356 | 2019 |
| 4 | GEP | SPIP | max | 1 | 3 | 2015 |
| 4 | GEP | SPIP | median | 1 | 2 | 4 |
| 4 | GEP | SPIP | recent | 1 | 3 | 2019 |
| 4 | GEP | SPTR | max | 3 | 16 | 2018 |
| 4 | GEP | SPTR | median | 3 | 13 | 5 |
| 4 | GEP | SPTR | recent | 0 | 2 | 2019 |
| 4 | GEP | USEF | max | 430 | 1861 | 2005 |
| 4 | GEP | USEF | median | 338 | 1464 | 5 |
| 4 | GEP | USEF | recent | 418 | 1810 | 2015 |
| 4 | GEP | WATE | max | 274 | 3963 | 2015 |
| 4 | GEP | WATE | median | 179 | 2595 | 10 |
| 4 | GEP | WATE | recent | 266 | 3858 | 2017 |

# Antarctica marine IBA: 5

| Site code | 5 |
| --- | --- |
| Species | CHP |
| IBA criteria | A4: Congregations |
| Decimal Latitude | -63.267 |
| Decimal Longitude | -62.377 |
| Area (ha) | 887140.2 |
| Area (km2) | 8871.402 |
| MPA Overlap | D1MPA |
| MPA Type | Proposed |
| MPA Zones | GPZ-AP,GPZ-SSI,KFZ-NWAP |


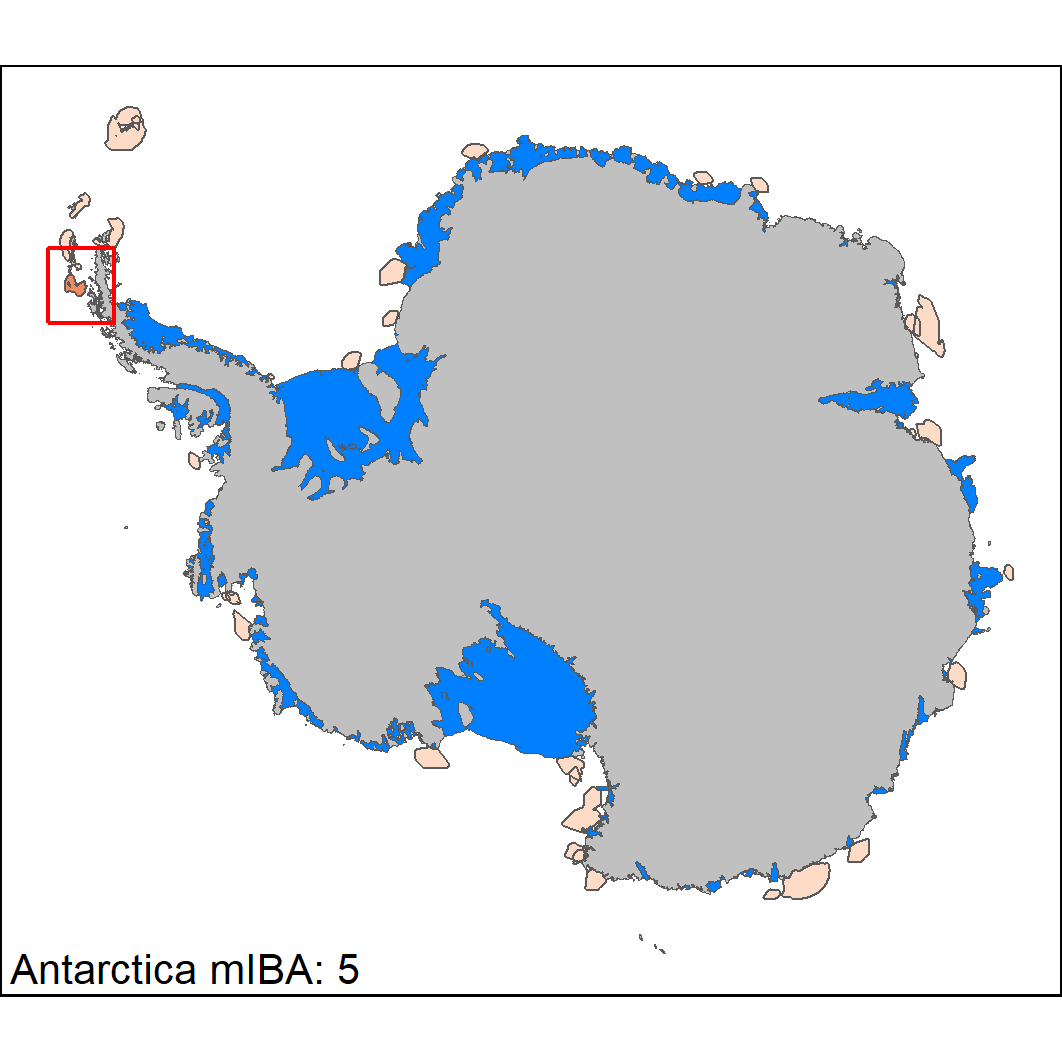


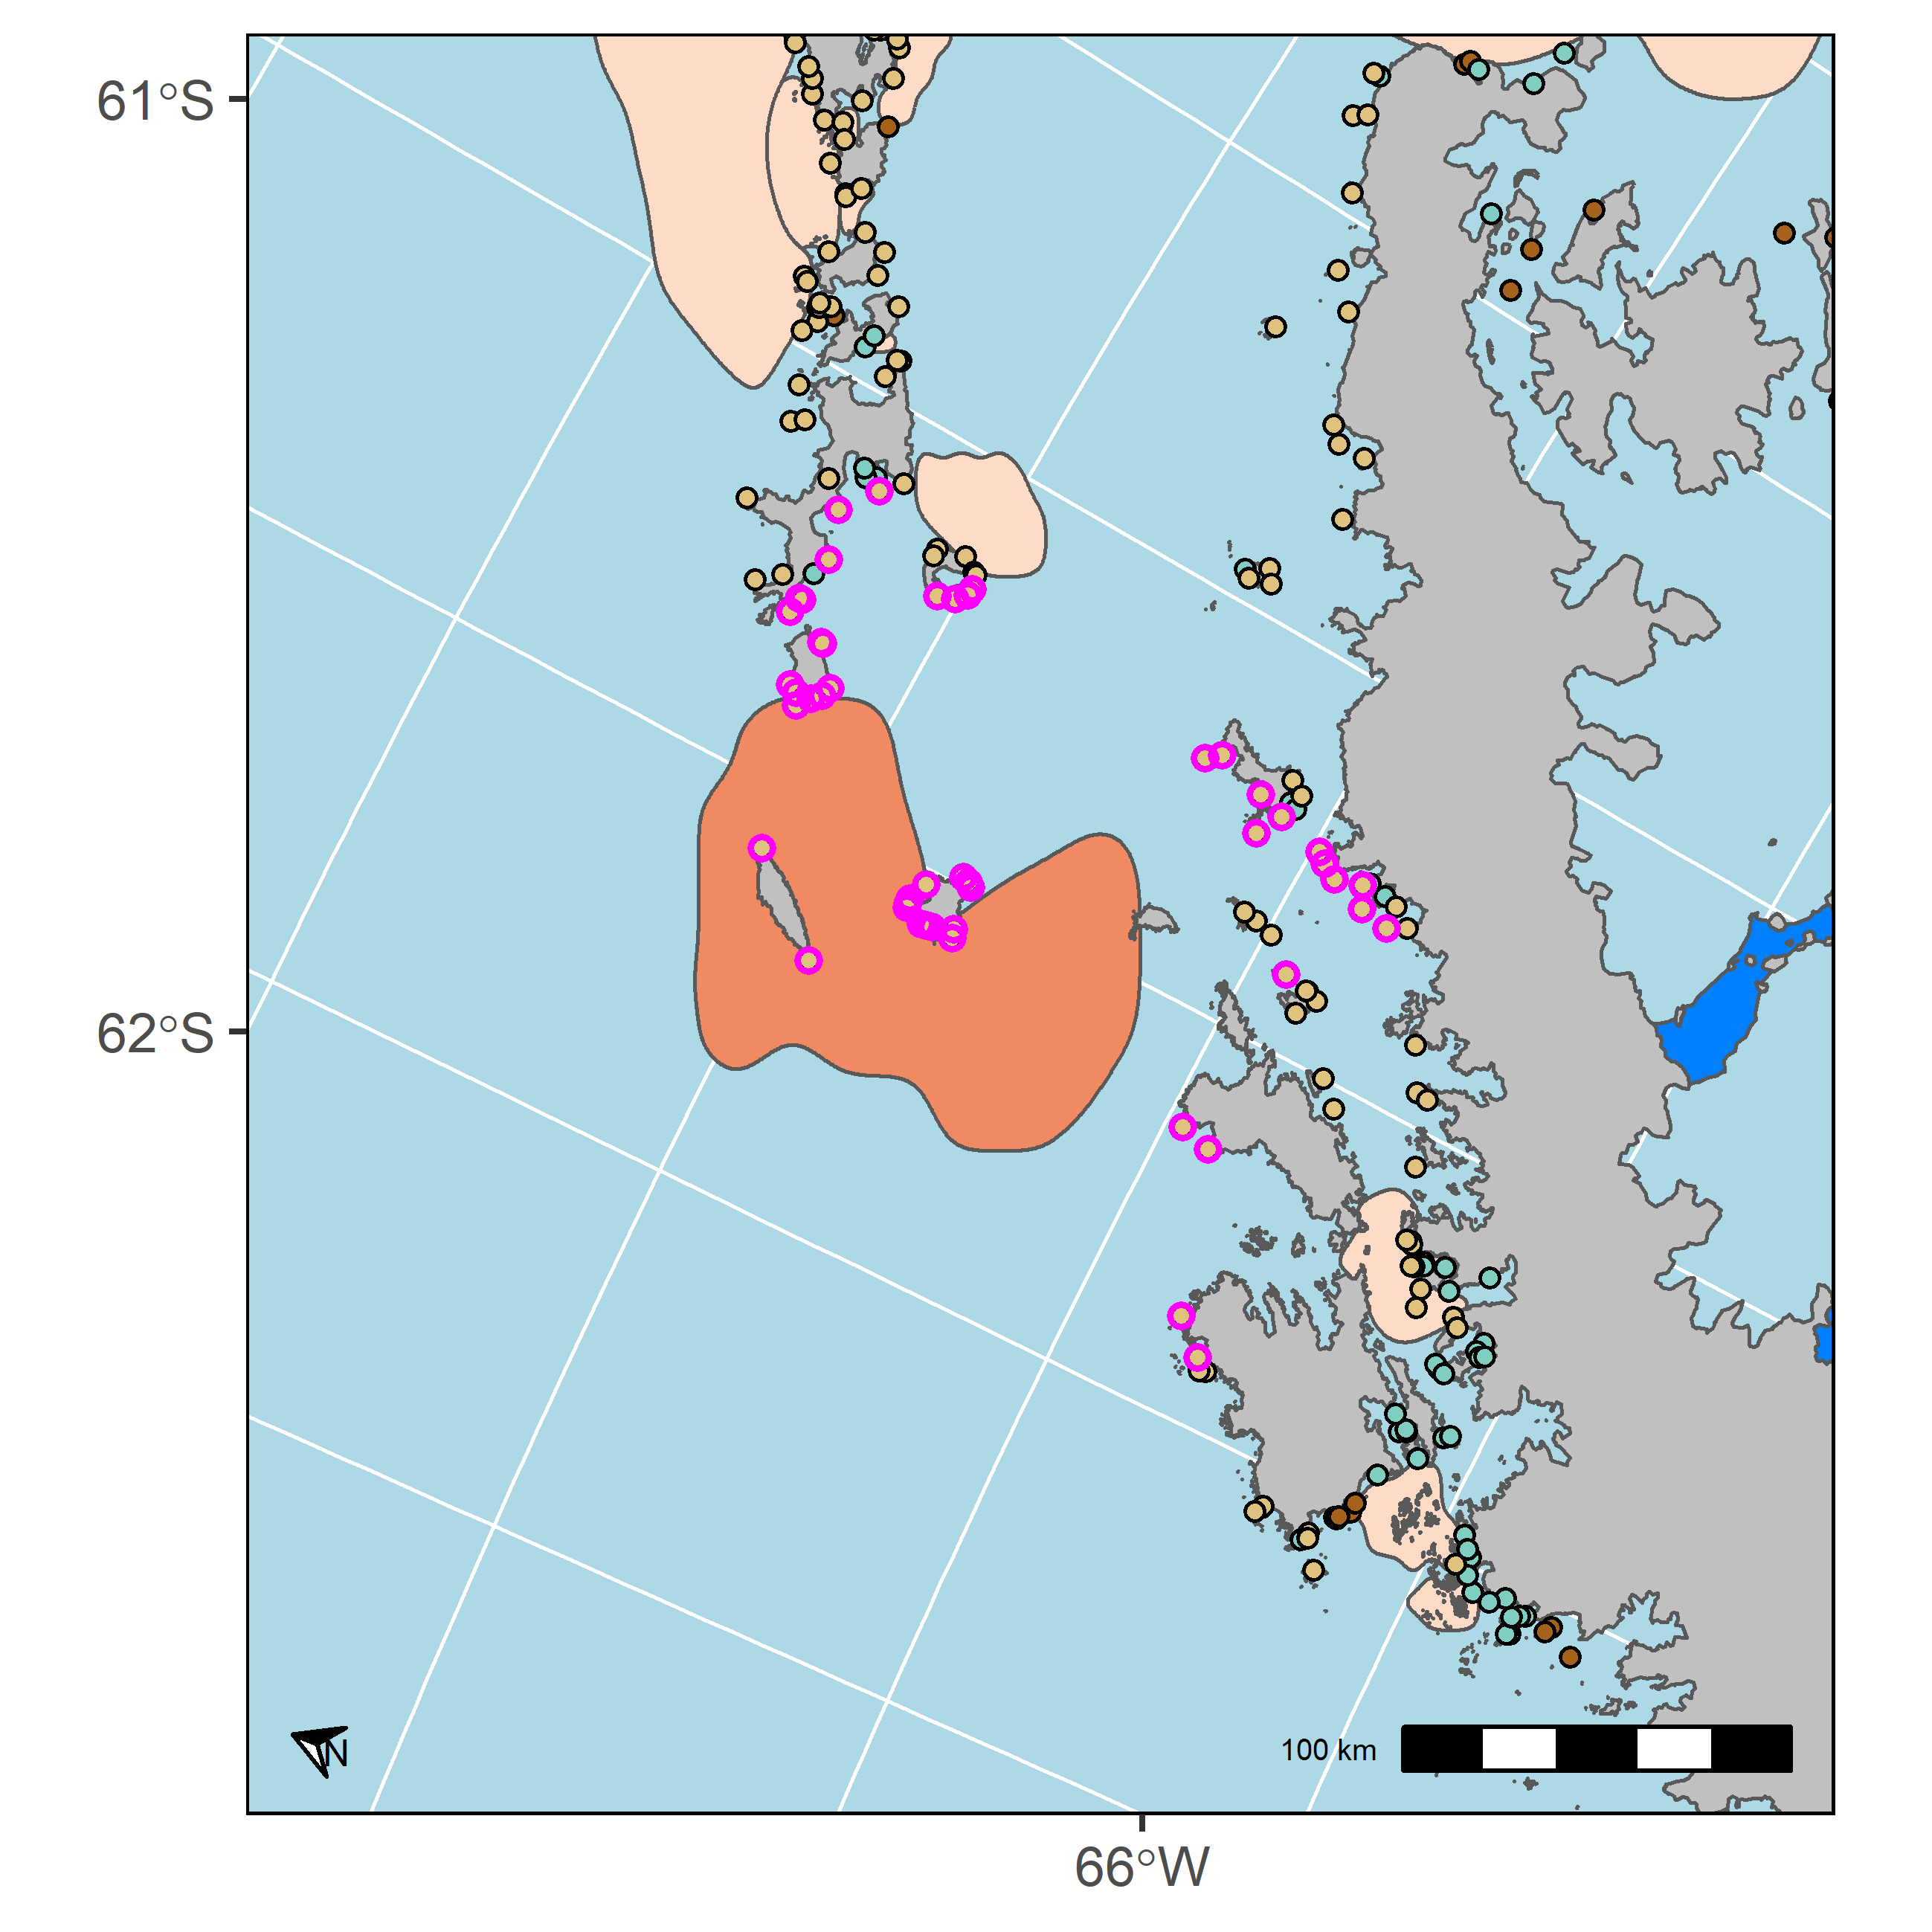


Figure A5.1: Focal Antarctica marine IBA 5 (orange polygon) for penguins, and other marine IBAs (light orange) for penguins identified during the project. Colonies circled in purple are those whose populations contributed to the marine IBA triggering IBA criteria A4 (>1% of the global population). See Table A5.2.

Table A5.1: Population estimates and count types (those that triggered IBA Criteria A4, >1% of global population) for key penguin species in Antarctic marine IBA 5. Key sources of colony input data associated with this marine IBA are detailed in Table A5.2. Population estimates refer to the lower and upper estimated number of adult breeding pairs likely to be using the marine IBA; derived from summing over all cells from individual colony density distribution surfaces which contributed to the identification of the marine IBA.

| Site code | Species | Count type | Lower | Upper |
| --- | --- | --- | --- | --- |
| 5 | CHP | min | 34187 | 292050 |
| 5 | CHP | max | 34187 | 292050 |
| 5 | CHP | median | 34187 | 292050 |
| 5 | CHP | recent | 34187 | 292050 |

Table A5.2: Population estimates (adult breeding pairs) and count types from individual colony(ies) density distribution surfaces which contributed to the identification of marine IBA: 5. I.e. The lower and upper estimated number of adult breeding pairs from a given colony that may utilise the marine IBA. Note, the lower population estimate represents the lowest estimated number of breeding pairs from a given colony contributing to the delineation of the marine IBA site. The lower population estimate may therefore be zero when only part of the individual colony(ies) density distribution surface contributed to the marine IBA. *The Count Year for the median population estimate indicates the number of yearly population assessments for the given colony. Colony names are given in the ‘Colony Codes’ table at the end of this document.

| Site code | Species | Colony | Count type | Lower | Upper | Count year* |
| --- | --- | --- | --- | --- | --- | --- |
| 5 | CHP | ALCO | max | 0 | 1 | 1989 |
| 5 | CHP | BPTS | min | 0 | 2500 | 1987 |
| 5 | CHP | BPTS | max | 0 | 2500 | 1987 |
| 5 | CHP | BPTS | median | 0 | 2500 | 1 |
| 5 | CHP | BPTS | recent | 0 | 2500 | 1987 |
| 5 | CHP | BYEW | min | 0 | 524 | 1987 |
| 5 | CHP | BYEW | max | 0 | 524 | 1987 |
| 5 | CHP | BYEW | median | 0 | 524 | 1 |
| 5 | CHP | BYEW | recent | 0 | 524 | 1987 |
| 5 | CHP | CAST | min | 0 | 5000 | 1987 |
| 5 | CHP | CAST | max | 0 | 5000 | 1987 |
| 5 | CHP | CAST | median | 0 | 5000 | 1 |
| 5 | CHP | CAST | recent | 0 | 5000 | 1987 |
| 5 | CHP | CCOE | min | 28 | 1867 | 1987 |
| 5 | CHP | CCOE | max | 28 | 1867 | 1987 |
| 5 | CHP | CCOE | median | 28 | 1867 | 1 |
| 5 | CHP | CCOE | recent | 28 | 1867 | 1987 |
| 5 | CHP | CHNE | min | 0 | 90 | 1987 |
| 5 | CHP | CHNE | max | 0 | 90 | 1987 |
| 5 | CHP | CHNE | median | 0 | 90 | 1 |
| 5 | CHP | CHNE | recent | 0 | 90 | 1987 |
| 5 | CHP | CHSE | min | 0 | 42 | 1998 |
| 5 | CHP | CHSE | max | 0 | 86 | 2011 |
| 5 | CHP | CHSE | median | 0 | 44 | 3 |
| 5 | CHP | CHSE | recent | 0 | 86 | 2011 |
| 5 | CHP | CLPT | min | 0 | 67 | 1985 |
| 5 | CHP | CLPT | max | 0 | 67 | 1985 |
| 5 | CHP | CLPT | median | 0 | 67 | 1 |
| 5 | CHP | CLPT | recent | 0 | 67 | 1985 |
| 5 | CHP | DEPT | min | 1 | 2497 | 1987 |
| 5 | CHP | DEPT | max | 1 | 2497 | 1987 |
| 5 | CHP | DEPT | median | 1 | 2497 | 1 |
| 5 | CHP | DEPT | recent | 1 | 2497 | 1987 |
| 5 | CHP | EGAR | min | 601 | 6000 | 1987 |
| 5 | CHP | EGAR | max | 601 | 6000 | 1987 |
| 5 | CHP | EGAR | median | 601 | 6000 | 1 |
| 5 | CHP | EGAR | recent | 601 | 6000 | 1987 |
| 5 | CHP | ELPT | min | 0 | 515 | 1987 |
| 5 | CHP | ELPT | max | 0 | 515 | 1987 |
| 5 | CHP | ELPT | median | 0 | 515 | 1 |
| 5 | CHP | ELPT | recent | 0 | 515 | 1987 |
| 5 | CHP | FARE | min | 0 | 28 | 2014 |
| 5 | CHP | FARE | max | 0 | 33 | 1986 |
| 5 | CHP | FARE | median | 0 | 31 | 4 |
| 5 | CHP | FARE | recent | 0 | 33 | 2016 |
| 5 | CHP | GARY | min | 26516 | 200000 | 1987 |
| 5 | CHP | GARY | max | 26516 | 200000 | 1987 |
| 5 | CHP | GARY | median | 26516 | 200000 | 1 |
| 5 | CHP | GARY | recent | 26516 | 200000 | 1987 |
| 5 | CHP | HANN | min | 0 | 120 | 2011 |
| 5 | CHP | HANN | max | 0 | 506 | 1987 |
| 5 | CHP | HANN | median | 0 | 215 | 9 |
| 5 | CHP | HANN | recent | 0 | 131 | 2014 |
| 5 | CHP | HOOK | min | 3574 | 12453 | 1987 |
| 5 | CHP | HOOK | max | 3574 | 12453 | 1987 |
| 5 | CHP | HOOK | median | 3574 | 12453 | 1 |
| 5 | CHP | HOOK | recent | 3574 | 12453 | 1987 |
| 5 | CHP | HORS | min | 927 | 3459 | 1987 |
| 5 | CHP | HORS | max | 927 | 3459 | 1987 |
| 5 | CHP | HORS | median | 927 | 3459 | 1 |
| 5 | CHP | HORS | recent | 927 | 3459 | 1987 |
| 5 | CHP | HPNE | min | 1308 | 1823 | 1987 |
| 5 | CHP | HPNE | max | 1308 | 1823 | 1987 |
| 5 | CHP | HPNE | median | 1308 | 1823 | 1 |
| 5 | CHP | HPNE | recent | 1308 | 1823 | 1987 |
| 5 | CHP | HPSW | min | 556 | 777 | 2011 |
| 5 | CHP | HPSW | max | 845 | 1181 | 1987 |
| 5 | CHP | HPSW | median | 701 | 979 | 2 |
| 5 | CHP | HPSW | recent | 556 | 777 | 2011 |
| 5 | CHP | JAME | min | 2778 | 10000 | 1987 |
| 5 | CHP | JAME | max | 2778 | 10000 | 1987 |
| 5 | CHP | JAME | median | 2778 | 10000 | 1 |
| 5 | CHP | JAME | recent | 2778 | 10000 | 1987 |
| 5 | CHP | JPTI | min | 128 | 2750 | 1987 |
| 5 | CHP | JPTI | max | 128 | 2750 | 1987 |
| 5 | CHP | JPTI | median | 128 | 2750 | 1 |
| 5 | CHP | JPTI | recent | 128 | 2750 | 1987 |
| 5 | CHP | JPTS | min | 87 | 1500 | 1987 |
| 5 | CHP | JPTS | max | 87 | 1500 | 1987 |
| 5 | CHP | JPTS | median | 87 | 1500 | 1 |
| 5 | CHP | JPTS | recent | 87 | 1500 | 1987 |
| 5 | CHP | JPTV | min | 2736 | 55000 | 1987 |
| 5 | CHP | JPTV | max | 2736 | 55000 | 1987 |
| 5 | CHP | JPTV | median | 2736 | 55000 | 1 |
| 5 | CHP | JPTV | recent | 2736 | 55000 | 1987 |
| 5 | CHP | LAJA | min | 9 | 88 | 1990 |
| 5 | CHP | LAJA | max | 9 | 88 | 1990 |
| 5 | CHP | LAJA | median | 9 | 88 | 1 |
| 5 | CHP | LAJA | recent | 9 | 88 | 1990 |
| 5 | CHP | LOBO | min | 0 | 3 | 1986 |
| 5 | CHP | LOBO | max | 0 | 3 | 1986 |
| 5 | CHP | LOBO | median | 0 | 3 | 1 |
| 5 | CHP | LOBO | recent | 0 | 3 | 1986 |
| 5 | CHP | MBNE | min | 0 | 26 | 1987 |
| 5 | CHP | MBNE | max | 0 | 26 | 1987 |
| 5 | CHP | MBNE | median | 0 | 26 | 1 |
| 5 | CHP | MBNE | recent | 0 | 26 | 1987 |
| 5 | CHP | MBNW | min | 0 | 10 | 1987 |
| 5 | CHP | MBNW | max | 0 | 10 | 1987 |
| 5 | CHP | MBNW | median | 0 | 10 | 1 |
| 5 | CHP | MBNW | recent | 0 | 10 | 1987 |
| 5 | CHP | MEGA | min | 0 | 317 | 1987 |
| 5 | CHP | MEGA | max | 0 | 317 | 1987 |
| 5 | CHP | MEGA | median | 0 | 317 | 1 |
| 5 | CHP | MEGA | recent | 0 | 317 | 1987 |
| 5 | CHP | METC | min | 0 | 2257 | 1983 |
| 5 | CHP | METC | max | 0 | 2257 | 1983 |
| 5 | CHP | METC | median | 0 | 2257 | 1 |
| 5 | CHP | METC | recent | 0 | 2257 | 1983 |
| 5 | CHP | MIDA | min | 0 | 51 | 1998 |
| 5 | CHP | MIDA | max | 0 | 194 | 1971 |
| 5 | CHP | MIDA | median | 0 | 127 | 4 |
| 5 | CHP | MIDA | recent | 0 | 65 | 2010 |
| 5 | CHP | MONU | min | 0 | 42 | 1984 |
| 5 | CHP | MONU | max | 0 | 42 | 1984 |
| 5 | CHP | MONU | median | 0 | 42 | 1 |
| 5 | CHP | MONU | recent | 0 | 42 | 1984 |
| 5 | CHP | MOPT | min | 0 | 2000 | 1987 |
| 5 | CHP | MOPT | max | 0 | 2000 | 1987 |
| 5 | CHP | MOPT | median | 0 | 2000 | 1 |
| 5 | CHP | MOPT | recent | 0 | 2000 | 1987 |
| 5 | CHP | NPRO | min | 5 | 100 | 1987 |
| 5 | CHP | NPRO | max | 5 | 100 | 1987 |
| 5 | CHP | NPRO | median | 5 | 100 | 1 |
| 5 | CHP | NPRO | recent | 5 | 100 | 1987 |
| 5 | CHP | ORCW | min | 621 | 8100 | 1987 |
| 5 | CHP | ORCW | max | 621 | 8100 | 1987 |
| 5 | CHP | ORCW | median | 621 | 8100 | 1 |
| 5 | CHP | ORCW | recent | 621 | 8100 | 1987 |
| 5 | CHP | PING | min | 0 | 48 | 1984 |
| 5 | CHP | PING | max | 0 | 374 | 2014 |
| 5 | CHP | PING | median | 0 | 317 | 10 |
| 5 | CHP | PING | recent | 0 | 328 | 2018 |
| 5 | CHP | QPTN | min | 0 | 2 | 1983 |
| 5 | CHP | QPTN | max | 0 | 2 | 1983 |
| 5 | CHP | QPTN | median | 0 | 2 | 1 |
| 5 | CHP | QPTN | recent | 0 | 2 | 1983 |
| 5 | CHP | SEMP | min | 2 | 176 | 2013 |
| 5 | CHP | SEMP | max | 2 | 176 | 2013 |
| 5 | CHP | SEMP | median | 2 | 176 | 1 |
| 5 | CHP | SEMP | recent | 2 | 176 | 2013 |
| 5 | CHP | SMIT | min | 901 | 4500 | 1987 |
| 5 | CHP | SMIT | max | 901 | 4500 | 1987 |
| 5 | CHP | SMIT | median | 901 | 4500 | 1 |
| 5 | CHP | SMIT | recent | 901 | 4500 | 1987 |
| 5 | CHP | SPBL | min | 3 | 9 | 2011 |
| 5 | CHP | SPBL | max | 52 | 181 | 1987 |
| 5 | CHP | SPBL | median | 27 | 95 | 2 |
| 5 | CHP | SPBL | recent | 3 | 9 | 2011 |
| 5 | CHP | SPNW | min | 63 | 64 | 2011 |
| 5 | CHP | SPNW | max | 177 | 179 | 1987 |
| 5 | CHP | SPNW | median | 120 | 121 | 2 |
| 5 | CHP | SPNW | recent | 63 | 64 | 2011 |
| 5 | CHP | TINW | min | 0 | 198 | 1987 |
| 5 | CHP | TINW | max | 0 | 198 | 1987 |
| 5 | CHP | TINW | median | 0 | 198 | 1 |
| 5 | CHP | TINW | recent | 0 | 198 | 1987 |
| 5 | CHP | TISW | min | 0 | 170 | 2016 |
| 5 | CHP | TISW | max | 0 | 443 | 1987 |
| 5 | CHP | TISW | median | 0 | 306 | 2 |
| 5 | CHP | TISW | recent | 0 | 170 | 2016 |
| 5 | CHP | TIWE | min | 0 | 195 | 1987 |
| 5 | CHP | TIWE | max | 0 | 195 | 1987 |
| 5 | CHP | TIWE | median | 0 | 195 | 1 |
| 5 | CHP | TIWE | recent | 0 | 195 | 1987 |
| 5 | CHP | TPTN | min | 20 | 72 | 1987 |
| 5 | CHP | TPTN | max | 20 | 72 | 1987 |
| 5 | CHP | TPTN | median | 20 | 72 | 1 |
| 5 | CHP | TPTN | recent | 20 | 72 | 1987 |
| 5 | CHP | UICW | min | 5006 | 50000 | 1987 |
| 5 | CHP | UICW | max | 5006 | 50000 | 1987 |
| 5 | CHP | UICW | median | 5006 | 50000 | 1 |
| 5 | CHP | UICW | recent | 5006 | 50000 | 1987 |
| 5 | CHP | VAPO | min | 174 | 5365 | 1987 |
| 5 | CHP | VAPO | max | 222 | 6859 | 2011 |
| 5 | CHP | VAPO | median | 198 | 6112 | 2 |
| 5 | CHP | VAPO | recent | 222 | 6859 | 2011 |
| 5 | CHP | VIET | min | 2 | 97 | 1987 |
| 5 | CHP | VIET | max | 2 | 97 | 1987 |
| 5 | CHP | VIET | median | 2 | 97 | 1 |
| 5 | CHP | VIET | recent | 2 | 97 | 1987 |
| 5 | CHP | VRNW | min | 0 | 44 | 1987 |
| 5 | CHP | VRNW | max | 0 | 44 | 1987 |
| 5 | CHP | VRNW | median | 0 | 44 | 1 |
| 5 | CHP | VRNW | recent | 0 | 44 | 1987 |
| 5 | CHP | WABL | min | 3938 | 75000 | 1987 |
| 5 | CHP | WABL | max | 3938 | 75000 | 1987 |
| 5 | CHP | WABL | median | 3938 | 75000 | 1 |
| 5 | CHP | WABL | recent | 3938 | 75000 | 1987 |
| 5 | CHP | WALL | min | 19392 | 225000 | 1987 |
| 5 | CHP | WALL | max | 19392 | 225000 | 1987 |
| 5 | CHP | WALL | median | 19392 | 225000 | 1 |
| 5 | CHP | WALL | recent | 19392 | 225000 | 1987 |
| 5 | CHP | WDEI | min | 2 | 73 | 2013 |
| 5 | CHP | WDEI | max | 2 | 73 | 2013 |
| 5 | CHP | WDEI | median | 2 | 73 | 1 |
| 5 | CHP | WDEI | recent | 2 | 73 | 2013 |

# Antarctica marine IBA: 6

| Site code | 6 |
| --- | --- |
| Species | CHP |
| IBA criteria | A4: Congregations |
| Decimal Latitude | -62.949 |
| Decimal Longitude | -60.263 |
| Area (ha) | 86648.57 |
| Area (km2) | 866.4857 |
| MPA Overlap | D1MPA |
| MPA Type | Proposed |
| MPA Zones | GPZ-SSI,KFZ-NWAP |


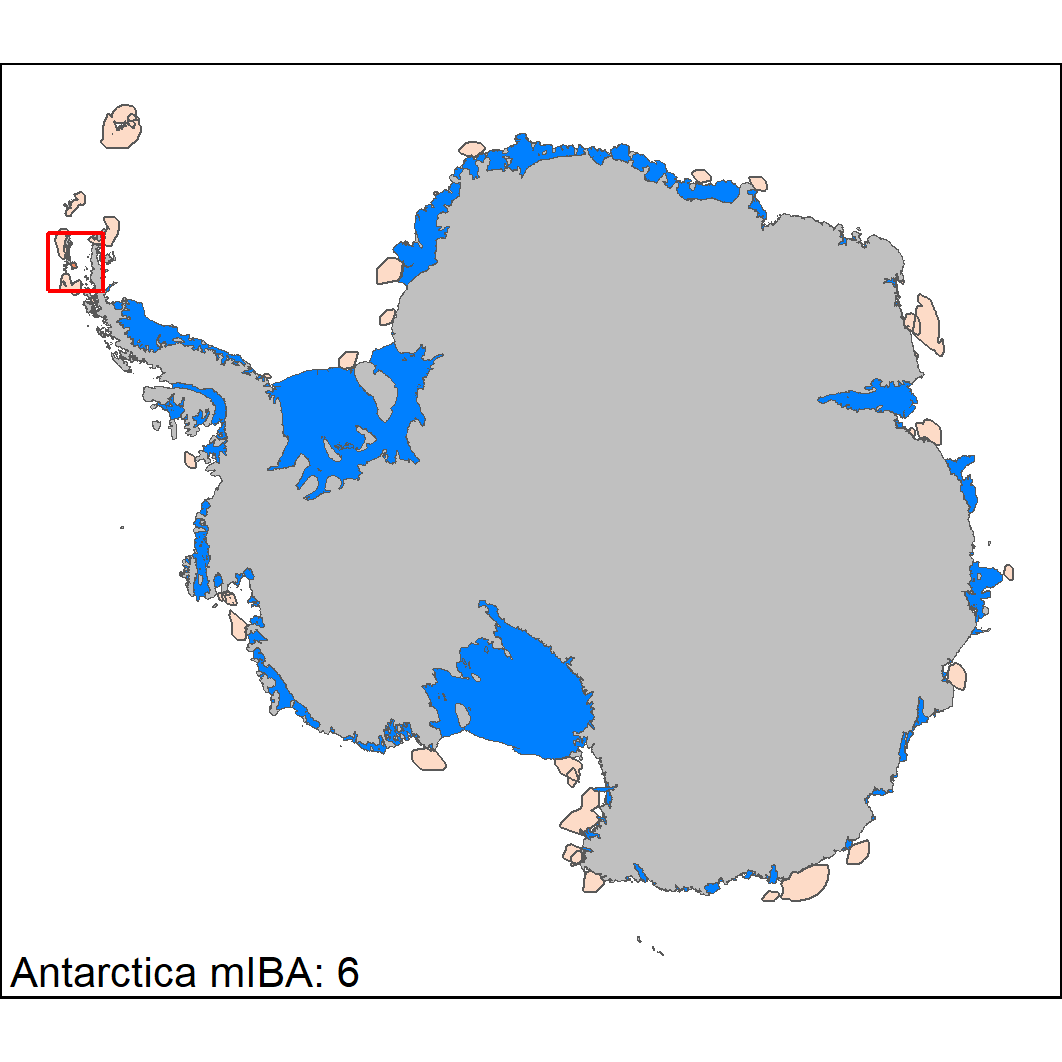


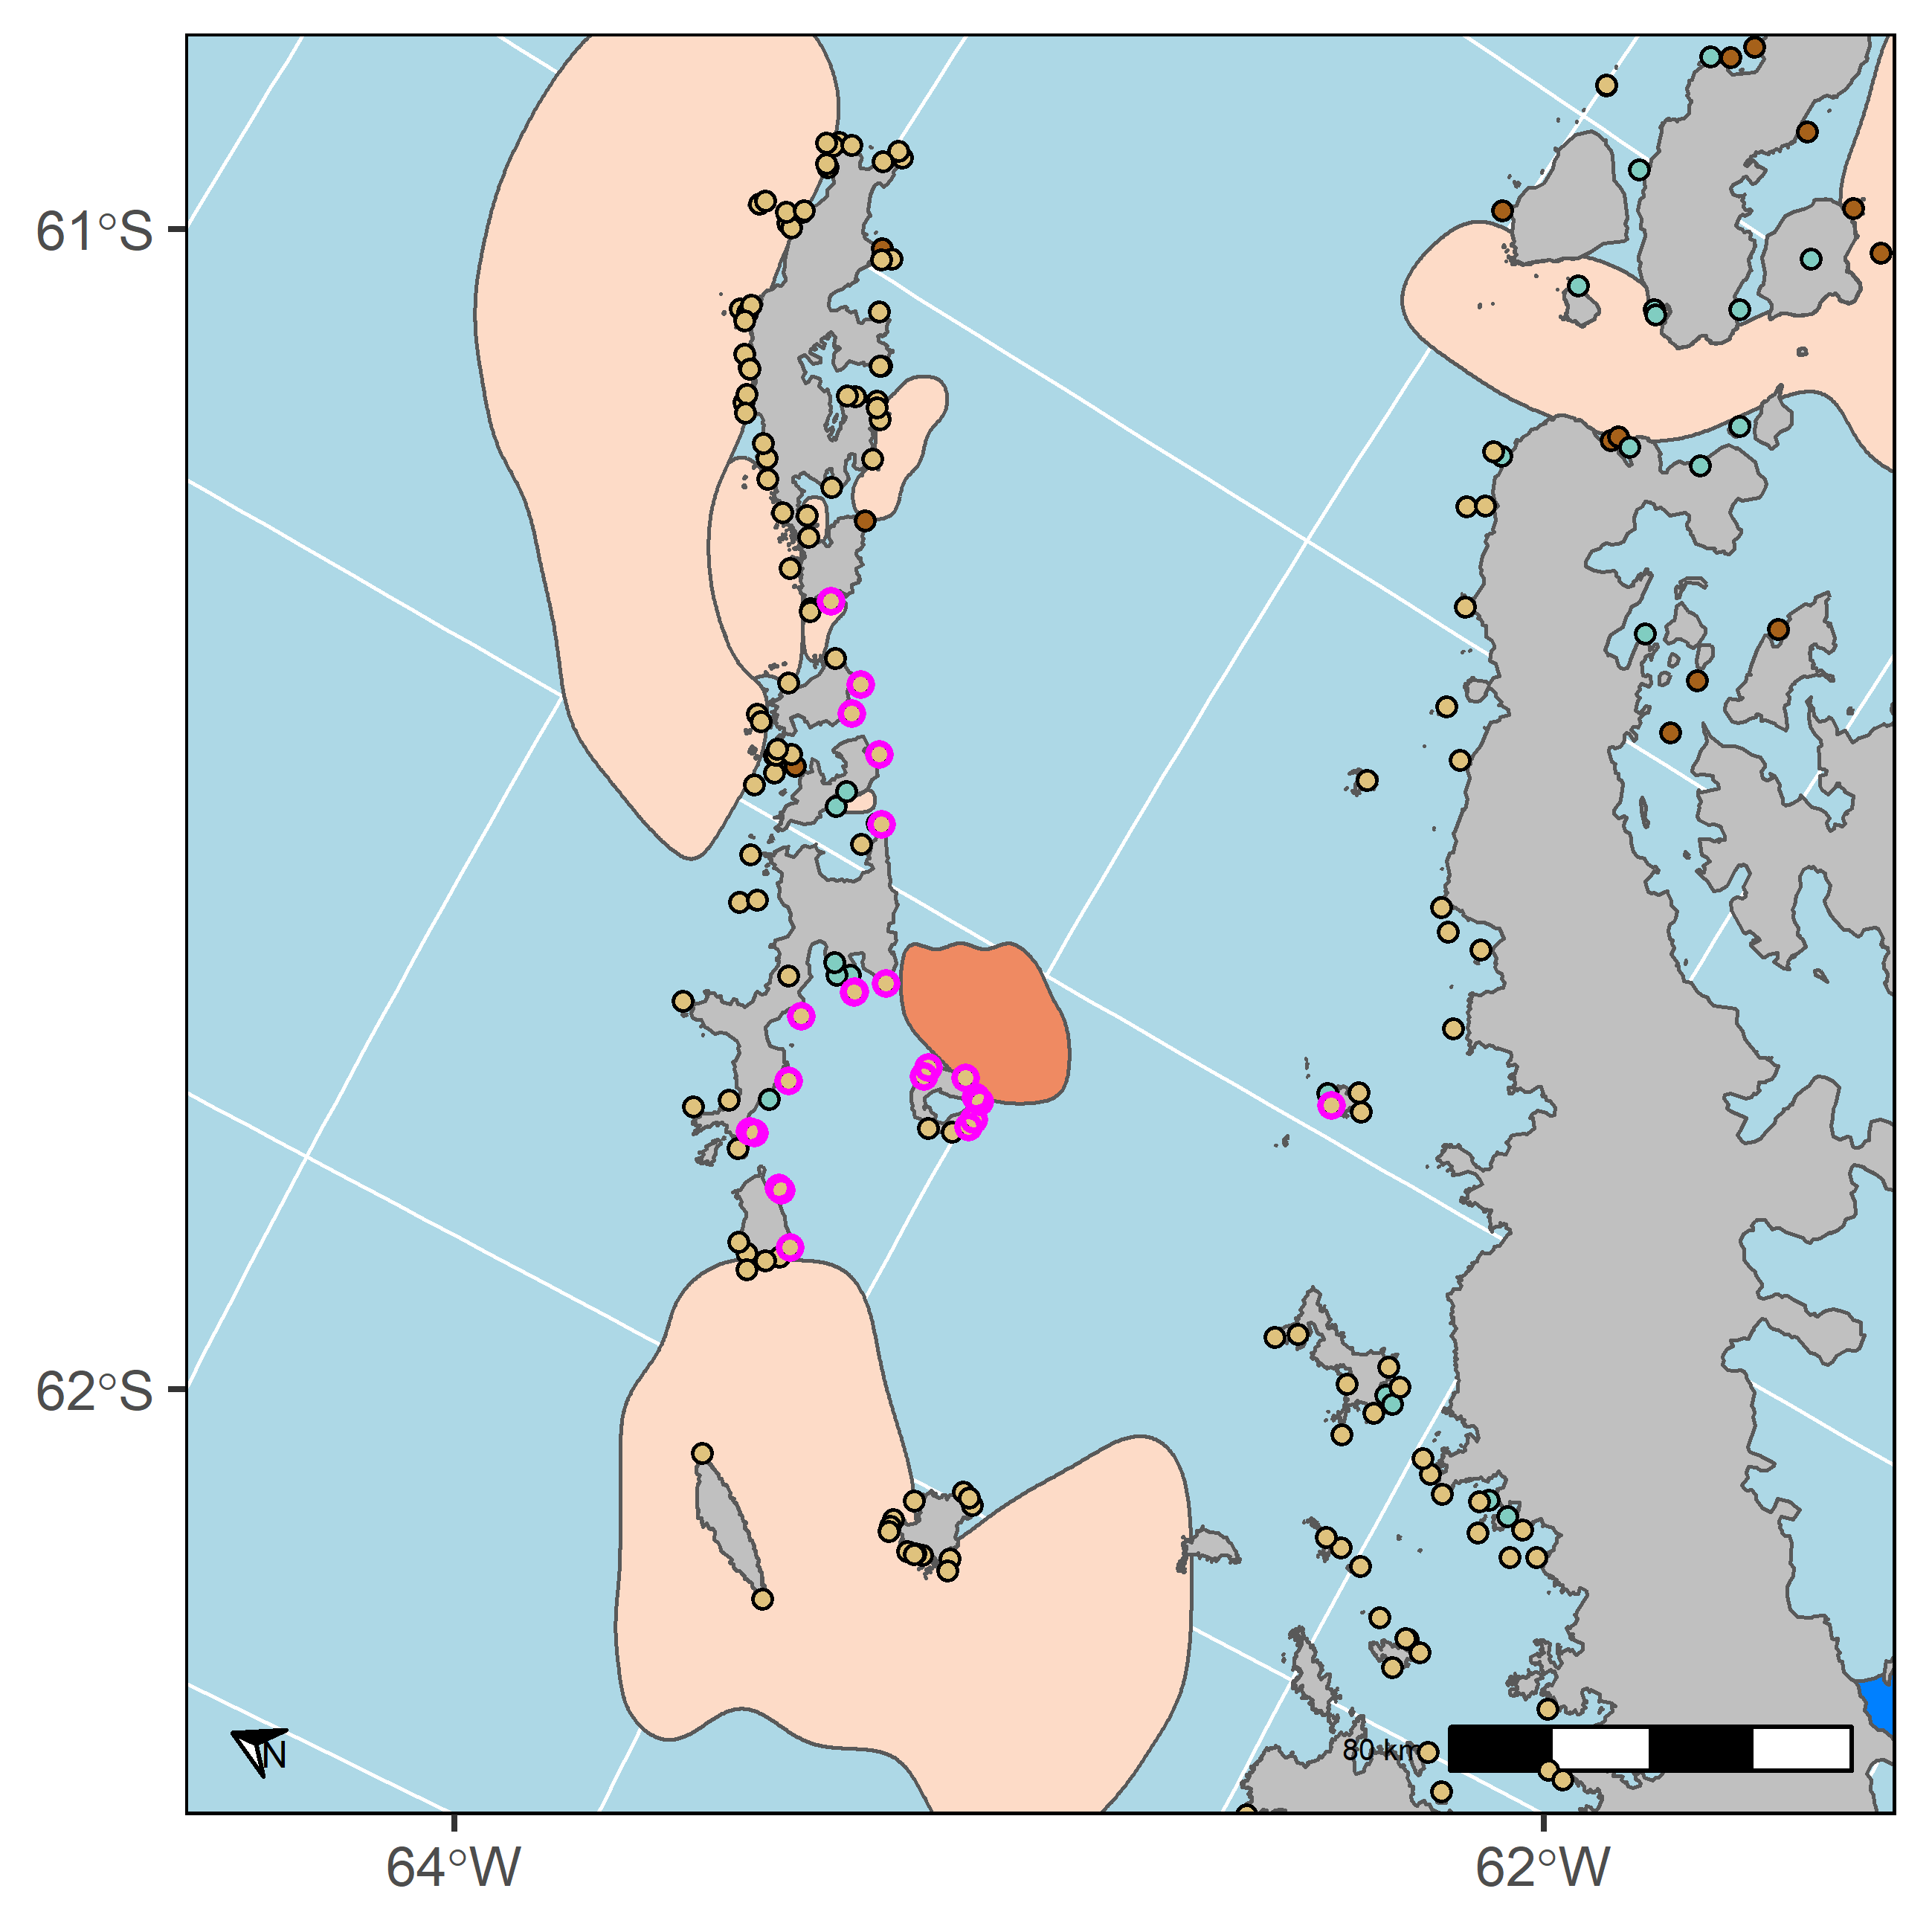


Figure A6.1: Focal Antarctica marine IBA 6 (orange polygon) for penguins, and other marine IBAs (light orange) for penguins identified during the project. Colonies circled in purple are those whose populations contributed to the marine IBA triggering IBA criteria A4 (>1% of the global population). See Table A6.2.

Table A6.1: Population estimates and count types (those that triggered IBA Criteria A4, >1% of global population) for key penguin species in Antarctic marine IBA 6. Key sources of colony input data associated with this marine IBA are detailed in Table A6.2. Population estimates refer to the lower and upper estimated number of adult breeding pairs likely to be using the marine IBA; derived from summing over all cells from individual colony density distribution surfaces which contributed to the identification of the marine IBA.

| Site code | Species | Count type | Lower | Upper |
| --- | --- | --- | --- | --- |
| 6 | CHP | max | 71087 | 140564 |
| 6 | CHP | median | 52322 | 102894 |
| 6 | CHP | recent | 34171 | 63875 |

Table A6.2: Population estimates (adult breeding pairs) and count types from individual colony(ies) density distribution surfaces which contributed to the identification of marine IBA: 6. I.e. The lower and upper estimated number of adult breeding pairs from a given colony that may utilise the marine IBA. Note, the lower population estimate represents the lowest estimated number of breeding pairs from a given colony contributing to the delineation of the marine IBA site. The lower population estimate may therefore be zero when only part of the individual colony(ies) density distribution surface contributed to the marine IBA. *The Count Year for the median population estimate indicates the number of yearly population assessments for the given colony. Colony names are given in the ‘Colony Codes’ table at the end of this document.

| Site code | Species | Colony | Count type | Lower | Upper | Count year* |
| --- | --- | --- | --- | --- | --- | --- |
| 6 | CHP | BAIL | max | 57126 | 125000 | 1987 |
| 6 | CHP | BAIL | median | 41130 | 90000 | 4 |
| 6 | CHP | BAIL | recent | 23037 | 50408 | 2011 |
| 6 | CHP | BARN | max | 4058 | 10480 | 1987 |
| 6 | CHP | BARN | median | 4058 | 10480 | 1 |
| 6 | CHP | BARN | recent | 4058 | 10480 | 1987 |
| 6 | CHP | CCOE | max | 267 | 514 | 1987 |
| 6 | CHP | CCOE | median | 267 | 514 | 1 |
| 6 | CHP | CCOE | recent | 267 | 514 | 1987 |
| 6 | CHP | EDWA | max | 0 | 7 | 1987 |
| 6 | CHP | EDWA | median | 0 | 7 | 1 |
| 6 | CHP | EDWA | recent | 0 | 7 | 1987 |
| 6 | CHP | ELPT | max | 151 | 644 | 1987 |
| 6 | CHP | ELPT | median | 151 | 644 | 1 |
| 6 | CHP | ELPT | recent | 151 | 644 | 1987 |
| 6 | CHP | ENTR | max | 416 | 986 | 2016 |
| 6 | CHP | ENTR | median | 304 | 720 | 9 |
| 6 | CHP | ENTR | recent | 369 | 874 | 2018 |
| 6 | CHP | ENTW | max | 1684 | 3982 | 2019 |
| 6 | CHP | ENTW | median | 1684 | 3982 | 1 |
| 6 | CHP | ENTW | recent | 1684 | 3982 | 2019 |
| 6 | CHP | FORT | max | 685 | 795 | 1987 |
| 6 | CHP | FORT | median | 225 | 261 | 6 |
| 6 | CHP | FORT | recent | 243 | 282 | 2018 |
| 6 | CHP | HANN | max | 252 | 1174 | 1987 |
| 6 | CHP | HANN | median | 107 | 498 | 9 |
| 6 | CHP | HANN | recent | 65 | 303 | 2014 |
| 6 | CHP | HPNE | max | 122 | 957 | 1987 |
| 6 | CHP | HPNE | median | 122 | 957 | 1 |
| 6 | CHP | HPNE | recent | 122 | 957 | 1987 |
| 6 | CHP | HPSW | max | 78 | 617 | 1987 |
| 6 | CHP | HPSW | median | 65 | 512 | 2 |
| 6 | CHP | HPSW | recent | 52 | 406 | 2011 |
| 6 | CHP | MBNE | max | 52 | 137 | 1987 |
| 6 | CHP | MBNE | median | 52 | 137 | 1 |
| 6 | CHP | MBNE | recent | 52 | 137 | 1987 |
| 6 | CHP | MBNW | max | 21 | 55 | 1987 |
| 6 | CHP | MBNW | median | 21 | 55 | 1 |
| 6 | CHP | MBNW | recent | 21 | 55 | 1987 |
| 6 | CHP | MIER | max | 1296 | 3415 | 1987 |
| 6 | CHP | MIER | median | 598 | 1576 | 3 |
| 6 | CHP | MIER | recent | 598 | 1576 | 2010 |
| 6 | CHP | MPTE | max | 360 | 685 | 2011 |
| 6 | CHP | MPTE | median | 360 | 685 | 1 |
| 6 | CHP | MPTE | recent | 360 | 685 | 2011 |
| 6 | CHP | MPTW | max | 1091 | 1893 | 2011 |
| 6 | CHP | MPTW | median | 634 | 1101 | 2 |
| 6 | CHP | MPTW | recent | 1091 | 1893 | 2011 |
| 6 | CHP | RENI | max | 144 | 572 | 1986 |
| 6 | CHP | RENI | median | 24 | 95 | 6 |
| 6 | CHP | RENI | recent | 3 | 13 | 2019 |
| 6 | CHP | ROBE | max | 0 | 465 | 1987 |
| 6 | CHP | ROBE | median | 0 | 288 | 4 |
| 6 | CHP | ROBE | recent | 0 | 269 | 2016 |
| 6 | CHP | SPBL | max | 2494 | 3607 | 1987 |
| 6 | CHP | SPBL | median | 1307 | 1890 | 2 |
| 6 | CHP | SPBL | recent | 120 | 174 | 2011 |
| 6 | CHP | SPNW | max | 7922 | 11354 | 1987 |
| 6 | CHP | SPNW | median | 5374 | 7703 | 2 |
| 6 | CHP | SPNW | recent | 2827 | 4051 | 2011 |
| 6 | CHP | TOWW | max | 0 | 199 | 1987 |
| 6 | CHP | TOWW | median | 0 | 199 | 1 |
| 6 | CHP | TOWW | recent | 0 | 199 | 1987 |
| 6 | CHP | TTOE | max | 0 | 4 | 1987 |
| 6 | CHP | TTOE | median | 0 | 3 | 2 |
| 6 | CHP | TTOE | recent | 0 | 4 | 1987 |
| 6 | CHP | VIET | max | 14 | 66 | 1987 |
| 6 | CHP | VIET | median | 14 | 66 | 1 |
| 6 | CHP | VIET | recent | 14 | 66 | 1987 |
| 6 | CHP | VRNW | max | 0 | 31 | 1987 |
| 6 | CHP | VRNW | median | 0 | 31 | 1 |
| 6 | CHP | VRNW | recent | 0 | 31 | 1987 |

# Antarctica marine IBA: 7

| Site code | 7 |
| --- | --- |
| Species | GEP |
| IBA criteria | A4: Congregations |
| Decimal Latitude | -62.545 |
| Decimal Longitude | -59.79 |
| Area (ha) | 3354.876 |
| Area (km2) | 33.54876 |
| MPA Overlap | D1MPA |
| MPA Type | Proposed |
| MPA Zones | GPZ-SSI |


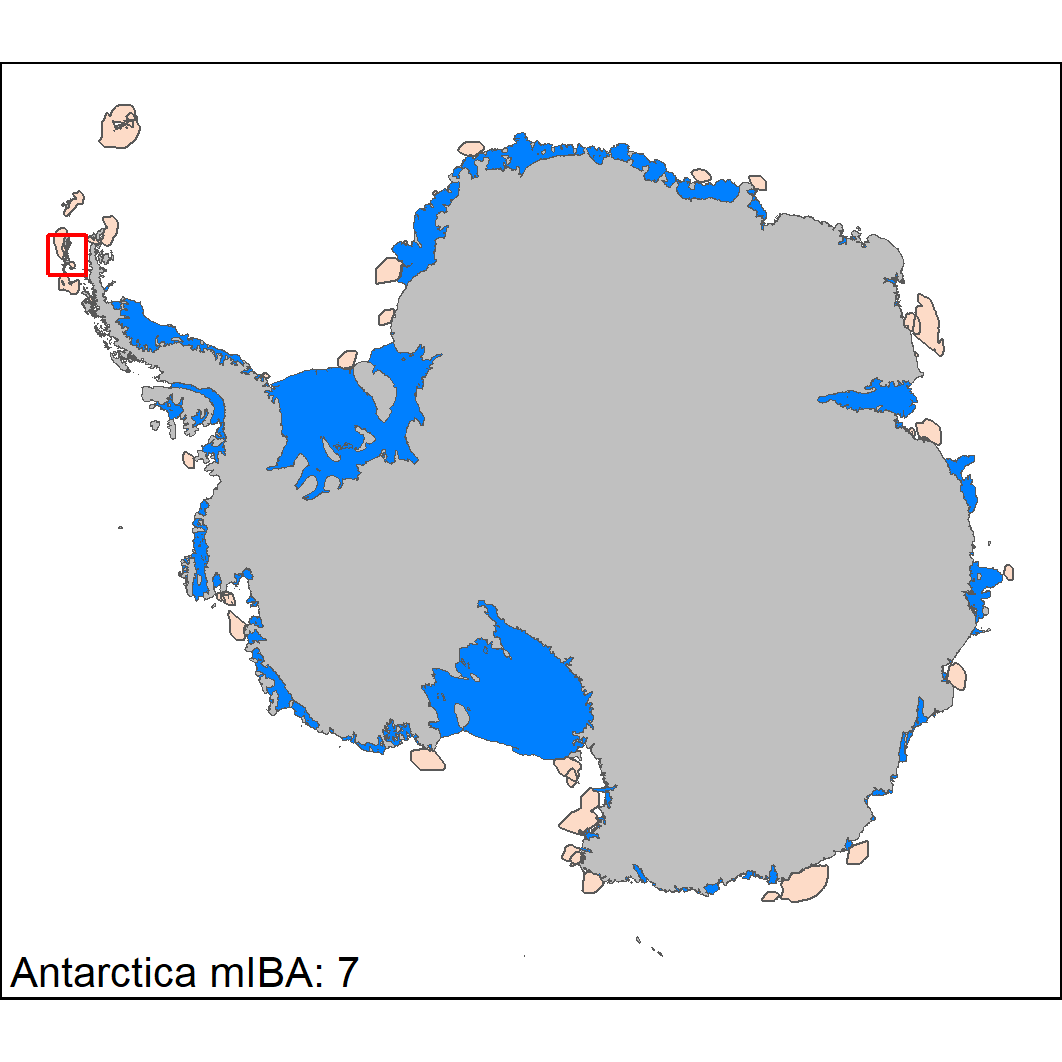


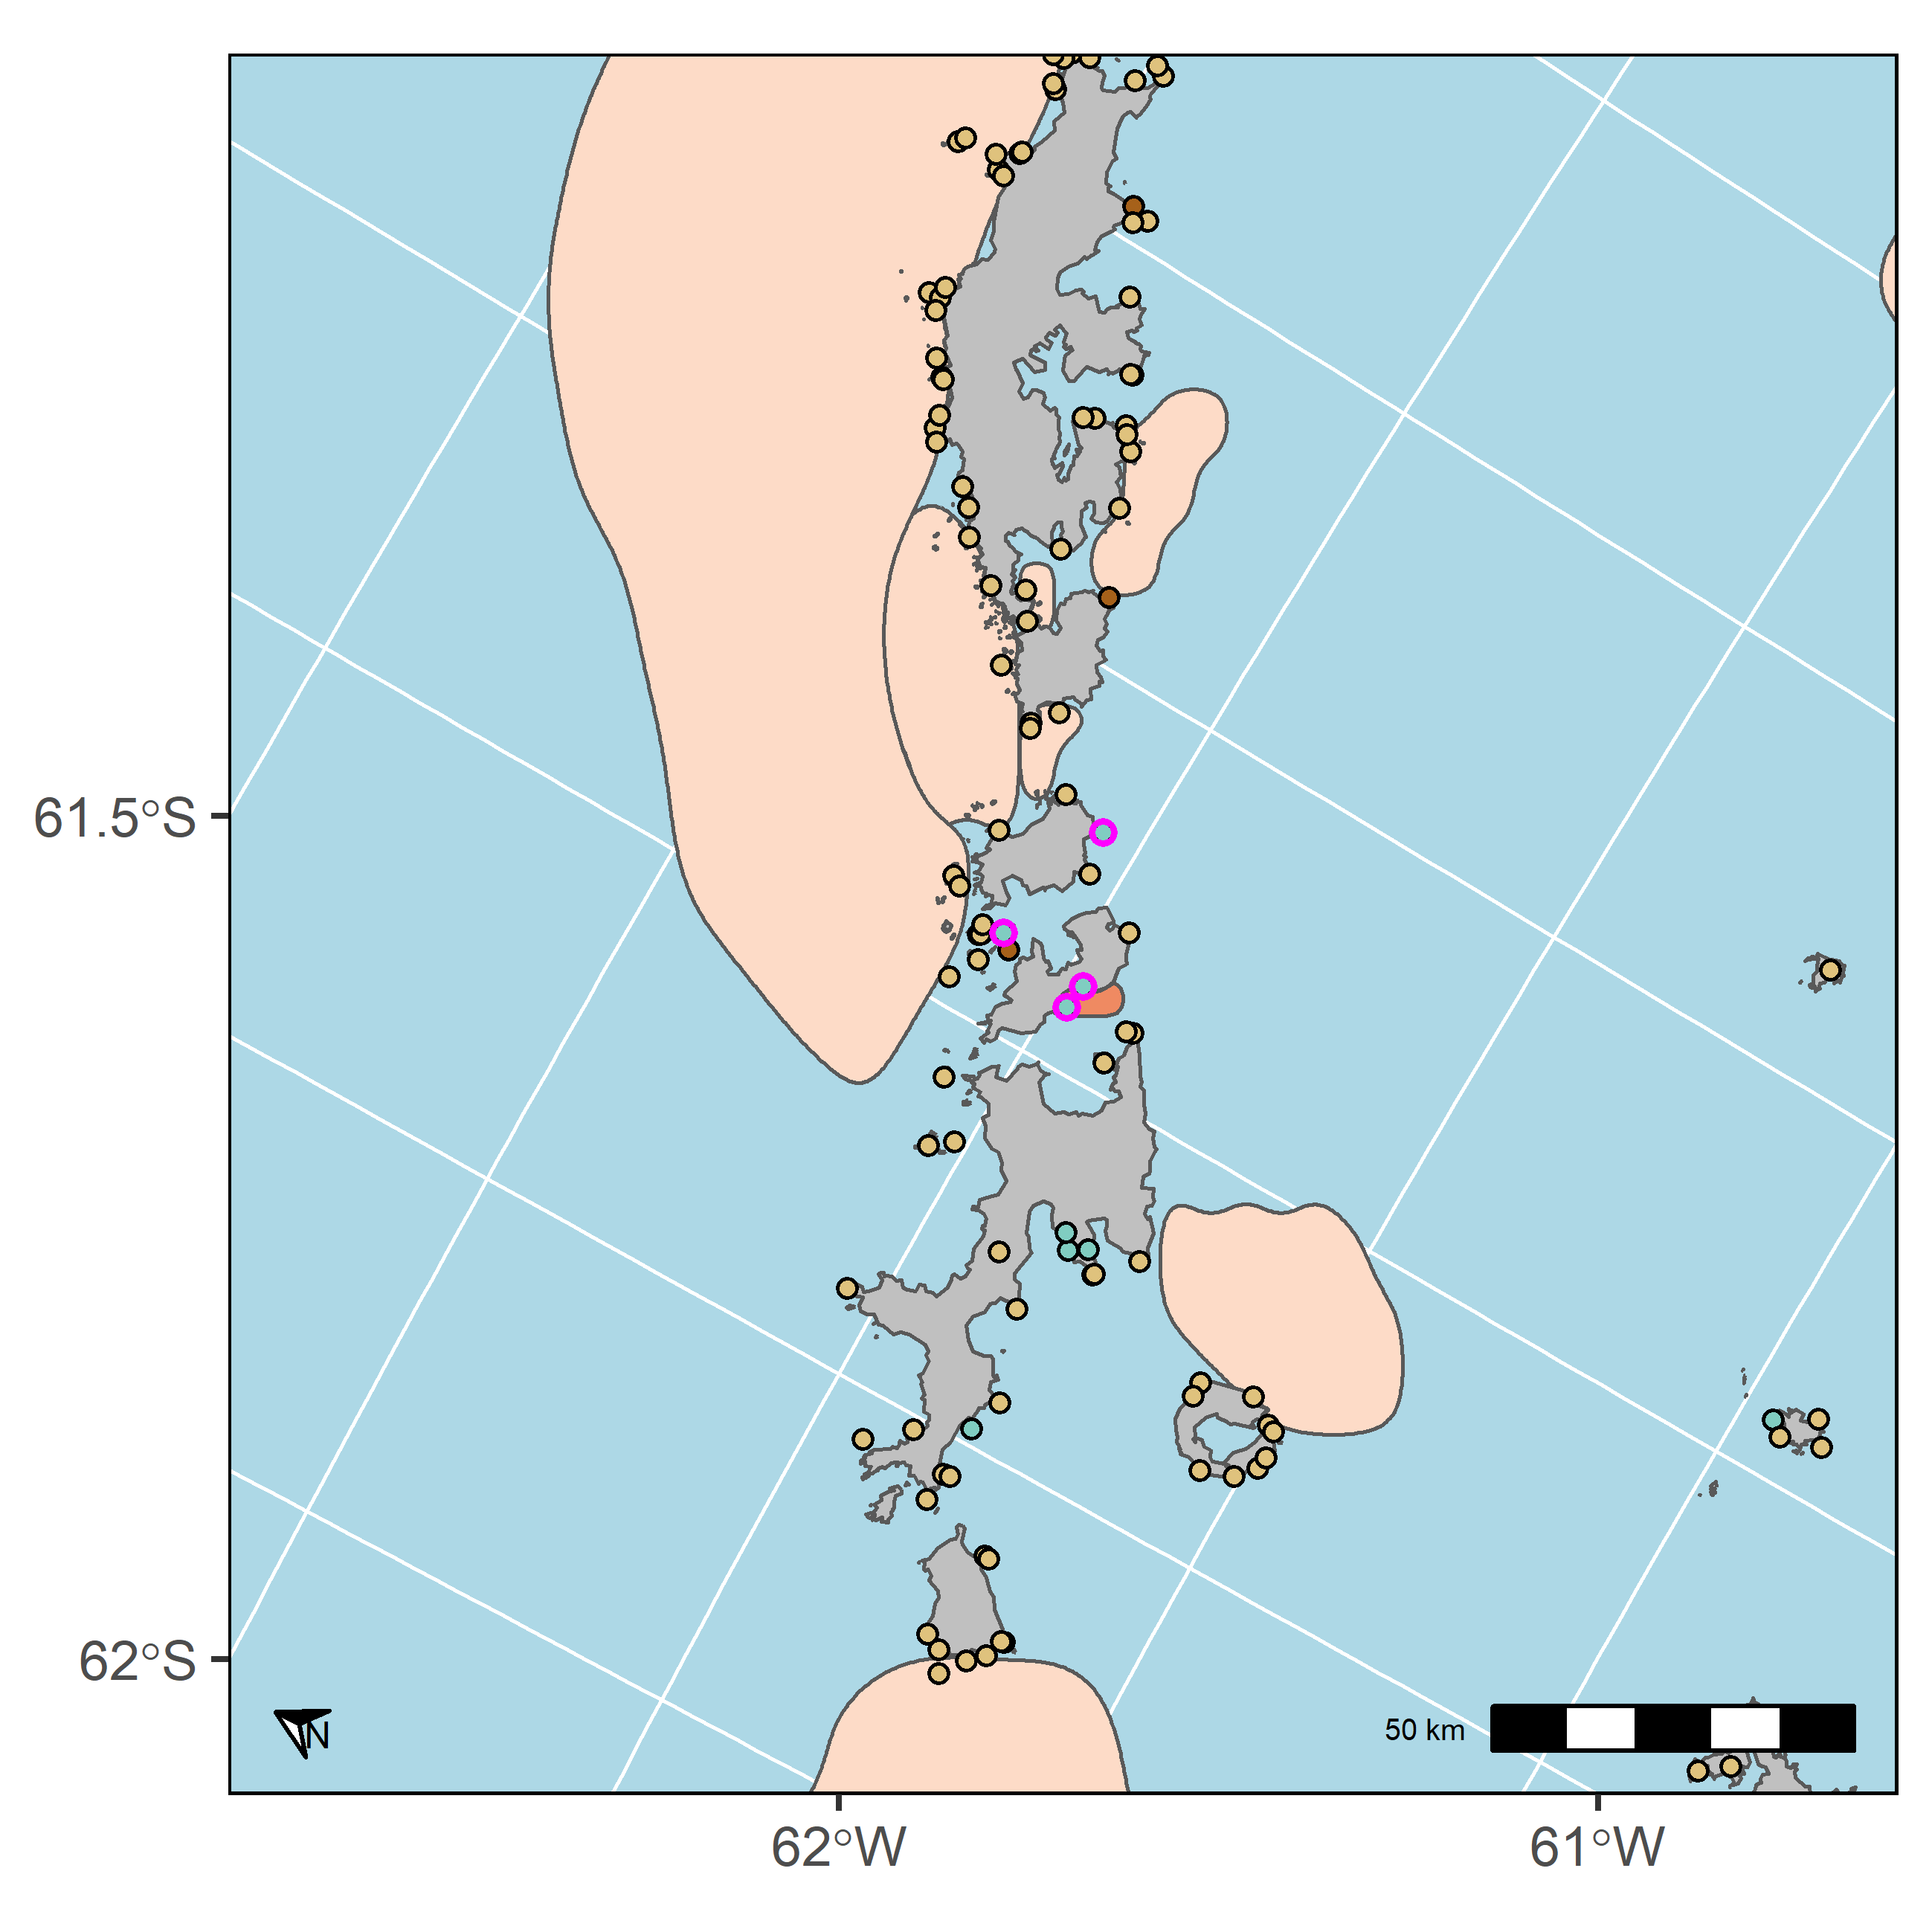


Figure A7.1: Focal Antarctica marine IBA 7 (orange polygon) for penguins, and other marine IBAs (light orange) for penguins identified during the project. Colonies circled in purple are those whose populations contributed to the marine IBA triggering IBA criteria A4 (>1% of the global population). See Table A7.2.

Table A7.1: Population estimates and count types (those that triggered IBA Criteria A4, >1% of global population) for key penguin species in Antarctic marine IBA 7. Key sources of colony input data associated with this marine IBA are detailed in Table A7.2. Population estimates refer to the lower and upper estimated number of adult breeding pairs likely to be using the marine IBA; derived from summing over all cells from individual colony density distribution surfaces which contributed to the identification of the marine IBA.

| Site code | Species | Count type | Lower | Upper |
| --- | --- | --- | --- | --- |
| 7 | GEP | max | 4803 | 5739 |
| 7 | GEP | median | 4054 | 4822 |
| 7 | GEP | recent | 4765 | 5722 |

Table A7.2: Population estimates (adult breeding pairs) and count types from individual colony(ies) density distribution surfaces which contributed to the identification of marine IBA: 7. I.e. The lower and upper estimated number of adult breeding pairs from a given colony that may utilise the marine IBA. Note, the lower population estimate represents the lowest estimated number of breeding pairs from a given colony contributing to the delineation of the marine IBA site. The lower population estimate may therefore be zero when only part of the individual colony(ies) density distribution surface contributed to the marine IBA. *The Count Year for the median population estimate indicates the number of yearly population assessments for the given colony. Colony names are given in the ‘Colony Codes’ table at the end of this document.

| Site code | Species | Colony | Count type | Lower | Upper | Count year* |
| --- | --- | --- | --- | --- | --- | --- |
| 7 | GEP | AITC | max | 1180 | 1180 | 2011 |
| 7 | GEP | AITC | median | 974 | 974 | 13 |
| 7 | GEP | AITC | recent | 1036 | 1036 | 2018 |
| 7 | GEP | ROBE | max | 287 | 287 | 2014 |
| 7 | GEP | ROBE | median | 250 | 250 | 4 |
| 7 | GEP | ROBE | recent | 250 | 250 | 2016 |
| 7 | GEP | TRIA | max | 31 | 45 | 1966 |
| 7 | GEP | TRIA | median | 31 | 45 | 1 |
| 7 | GEP | TRIA | recent | 31 | 45 | 1966 |
| 7 | GEP | YANK | max | 4484 | 5677 | 2016 |
| 7 | GEP | YANK | median | 3773 | 4777 | 10 |
| 7 | GEP | YANK | recent | 4484 | 5677 | 2016 |

# Antarctica marine IBA: 8

| Site code | 8 |
| --- | --- |
| Species | CHP |
| IBA criteria | A4: Congregations |
| Decimal Latitude | -62.334 |
| Decimal Longitude | -59.264 |
| Area (ha) | 7305.973 |
| Area (km2) | 73.05973 |
| MPA Overlap | D1MPA |
| MPA Type | Proposed |
| MPA Zones | GPZ-SSI,KFZ-NWAP |


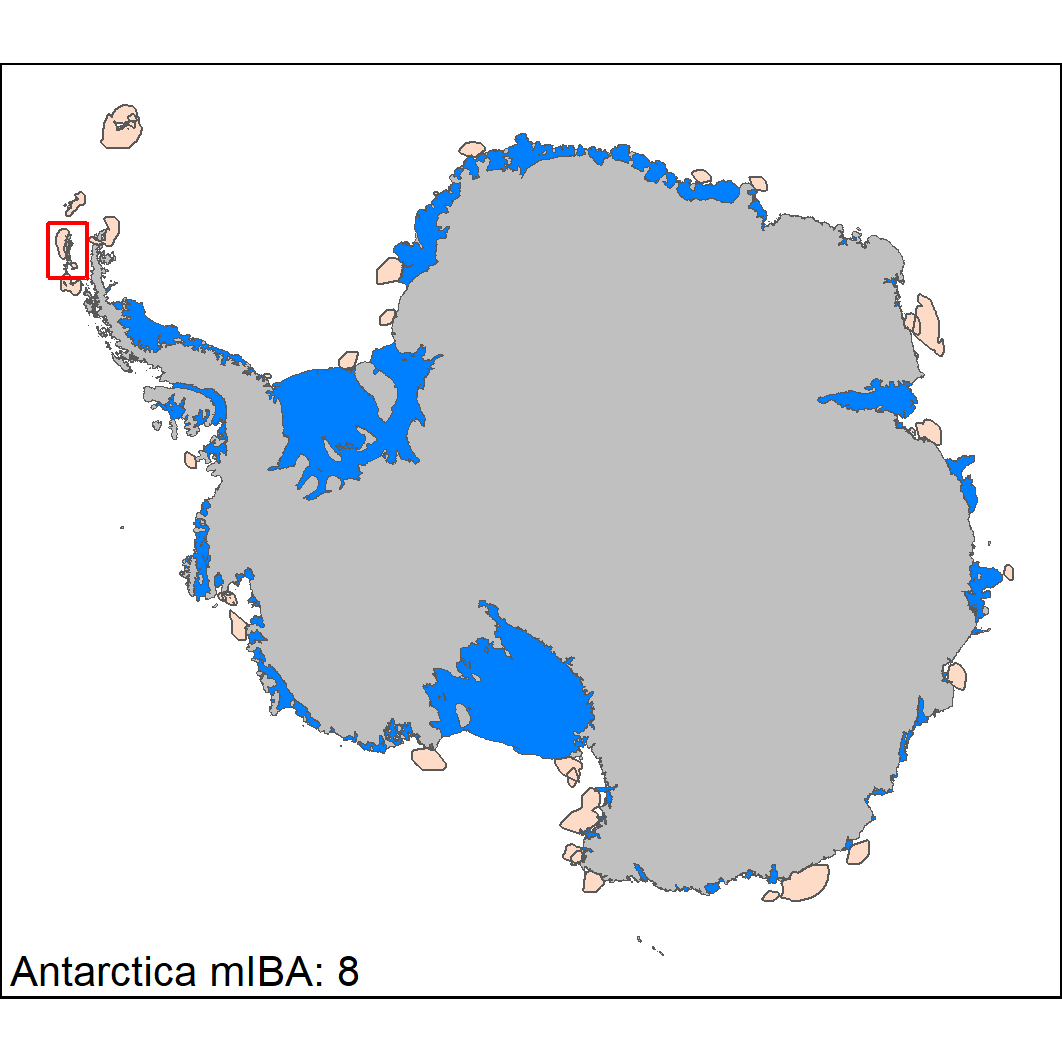


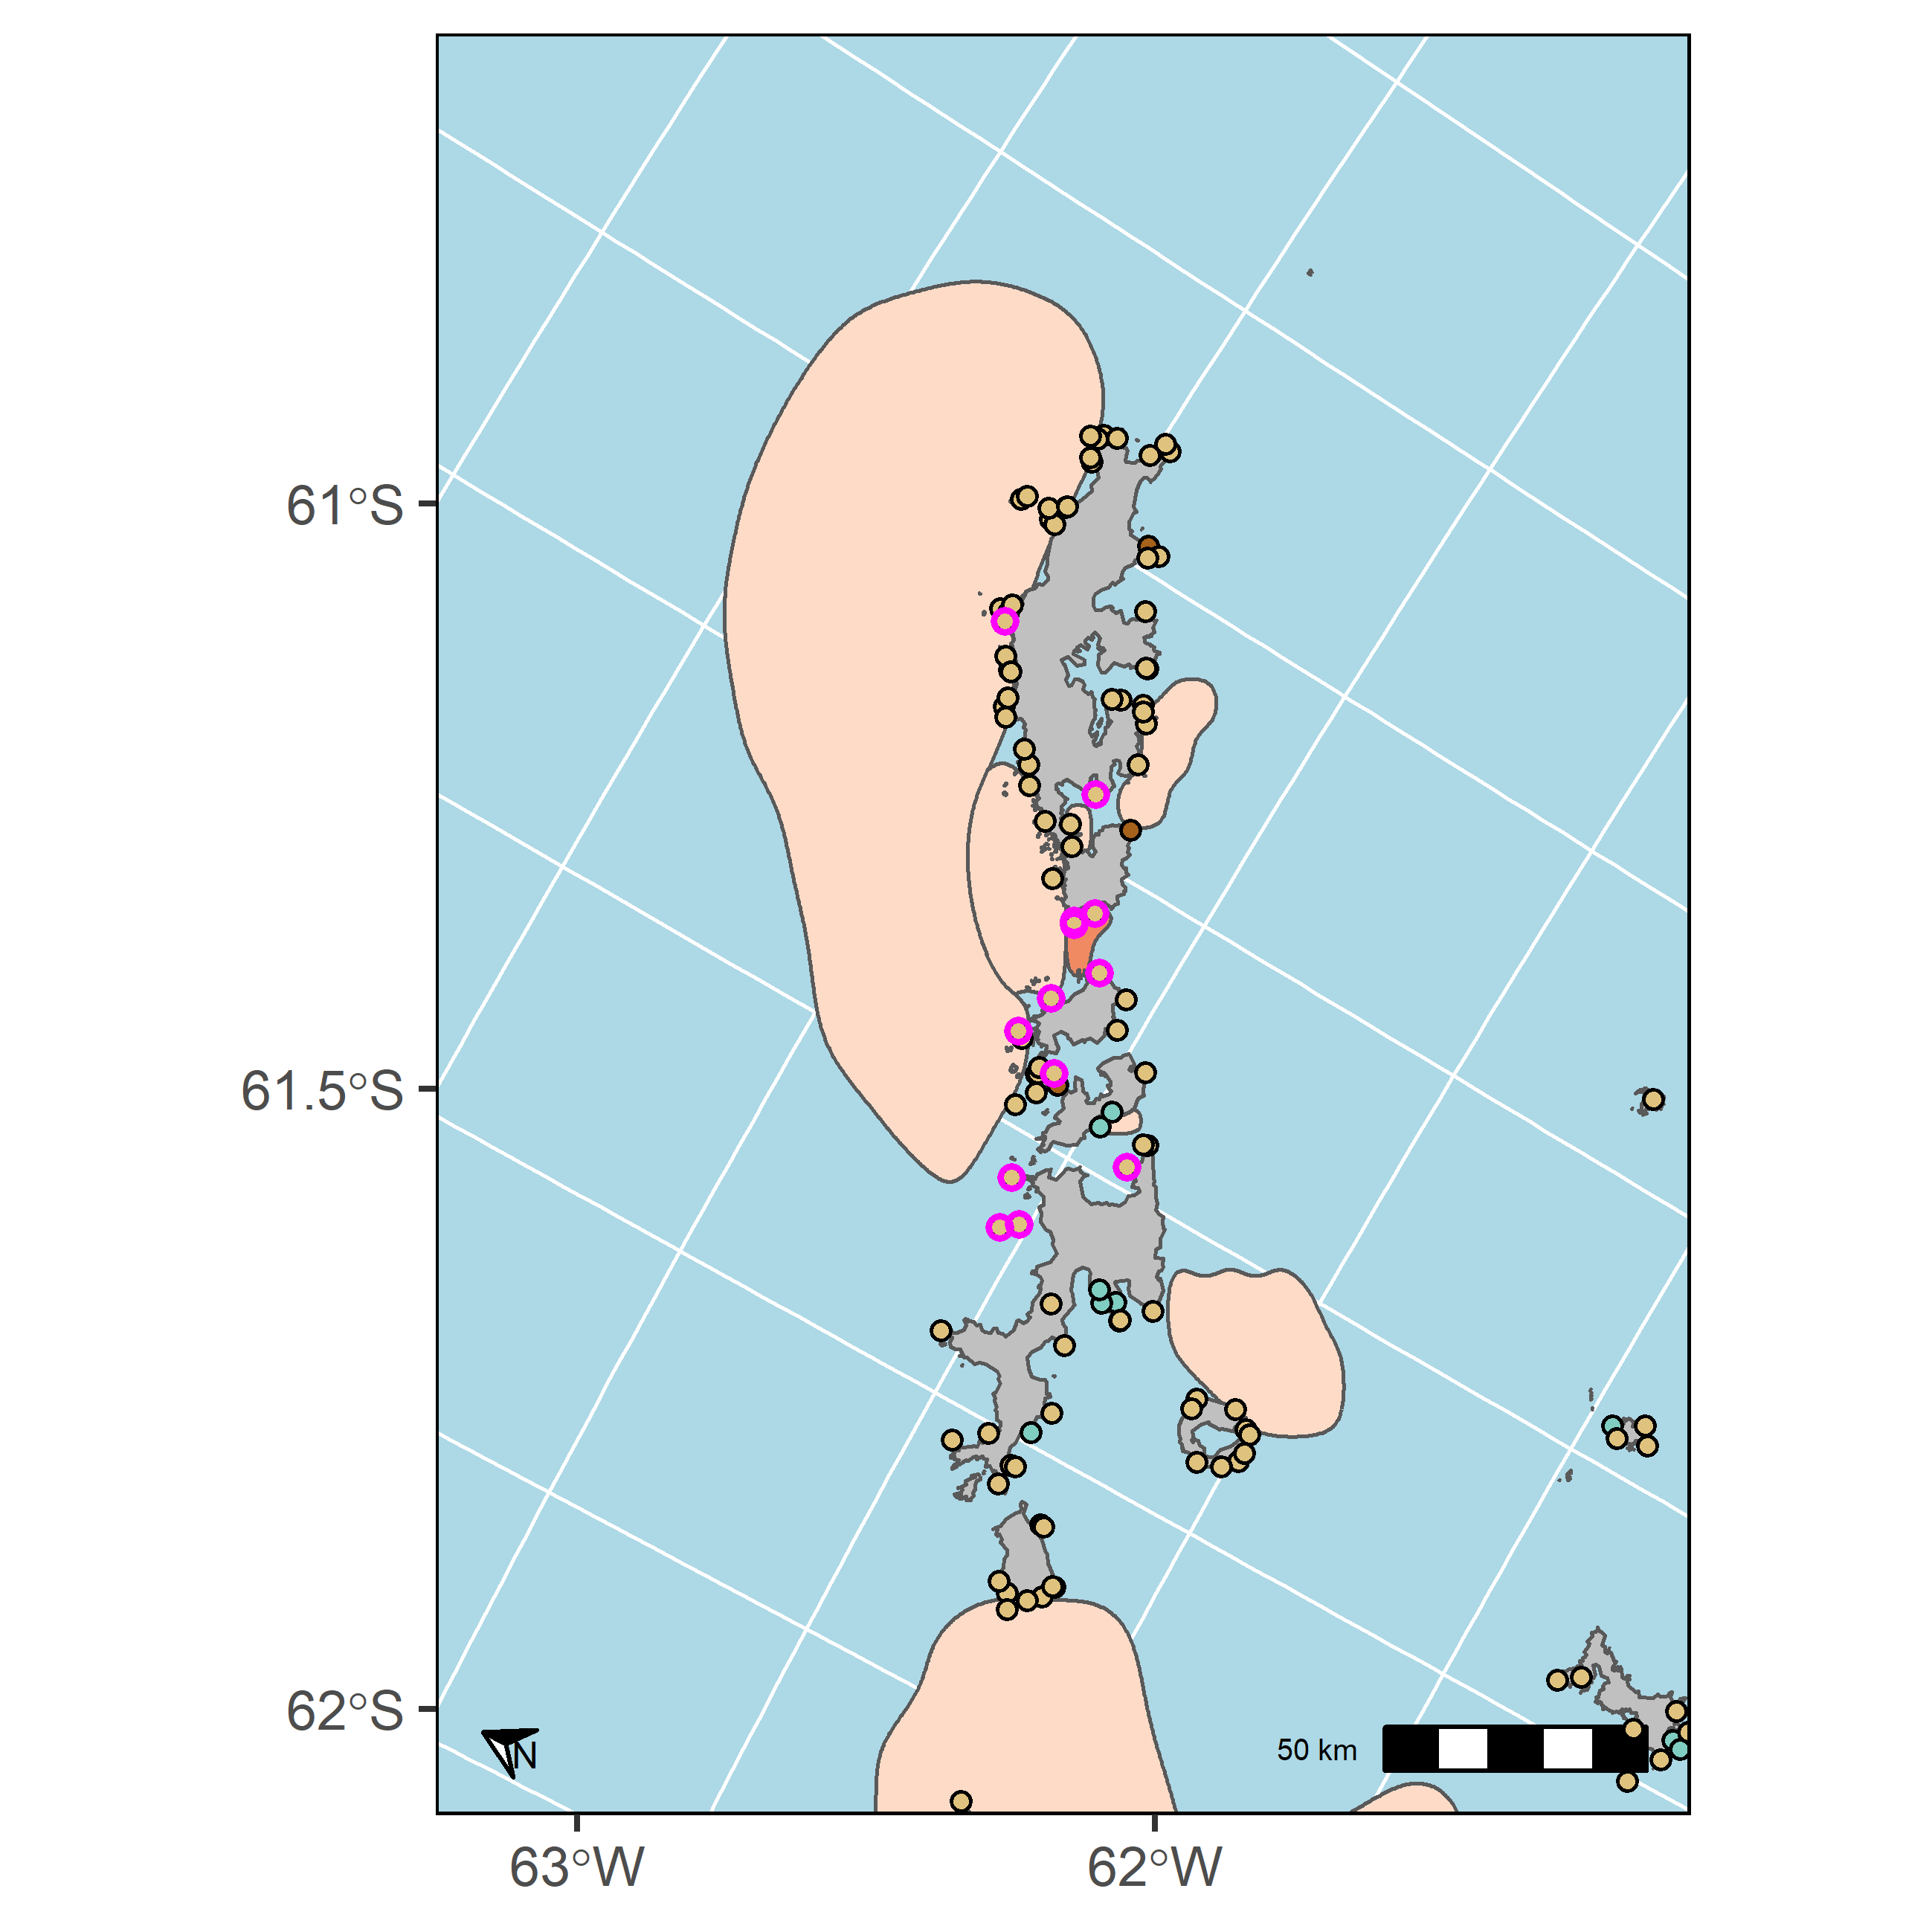


Figure A8.1: Focal Antarctica marine IBA 8 (orange polygon) for penguins, and other marine IBAs (light orange) for penguins identified during the project. Colonies circled in purple are those whose populations contributed to the marine IBA triggering IBA criteria A4 (>1% of the global population). See Table A8.2.

Table A8.1: Population estimates and count types (those that triggered IBA Criteria A4, >1% of global population) for key penguin species in Antarctic marine IBA 8. Key sources of colony input data associated with this marine IBA are detailed in Table A8.2. Population estimates refer to the lower and upper estimated number of adult breeding pairs likely to be using the marine IBA; derived from summing over all cells from individual colony density distribution surfaces which contributed to the identification of the marine IBA.

| Site code | Species | Count type | Lower | Upper |
| --- | --- | --- | --- | --- |
| 8 | CHP | max | 43696 | 301750 |
| 8 | CHP | median | 37290 | 127699 |
| 8 | CHP | recent | 40831 | 121707 |

Table A8.2: Population estimates (adult breeding pairs) and count types from individual colony(ies) density distribution surfaces which contributed to the identification of marine IBA: 8. I.e. The lower and upper estimated number of adult breeding pairs from a given colony that may utilise the marine IBA. Note, the lower population estimate represents the lowest estimated number of breeding pairs from a given colony contributing to the delineation of the marine IBA site. The lower population estimate may therefore be zero when only part of the individual colony(ies) density distribution surface contributed to the marine IBA. *The Count Year for the median population estimate indicates the number of yearly population assessments for the given colony. Colony names are given in the ‘Colony Codes’ table at the end of this document.

| Site code | Species | Colony | Count type | Lower | Upper | Count year* |
| --- | --- | --- | --- | --- | --- | --- |
| 8 | CHP | AITC | max | 1626 | 2210 | 2008 |
| 8 | CHP | AITC | median | 1252 | 1702 | 4 |
| 8 | CHP | AITC | recent | 1099 | 1493 | 2018 |
| 8 | CHP | BART | max | 2870 | 2870 | 1980 |
| 8 | CHP | BART | median | 1341 | 1341 | 16 |
| 8 | CHP | BART | recent | 1439 | 1439 | 2013 |
| 8 | CHP | DESO | max | 659 | 2289 | 1987 |
| 8 | CHP | DESO | median | 659 | 2289 | 1 |
| 8 | CHP | DESO | recent | 659 | 2289 | 1987 |
| 8 | CHP | HALF | max | 1135 | 1318 | 1987 |
| 8 | CHP | HALF | median | 383 | 444 | 15 |
| 8 | CHP | HALF | recent | 230 | 267 | 2019 |
| 8 | CHP | HARE | max | 1038 | 1750 | 1987 |
| 8 | CHP | HARE | median | 1038 | 1750 | 1 |
| 8 | CHP | HARE | recent | 1038 | 1750 | 1987 |
| 8 | CHP | HARM | max | 193252 | 300000 | 1987 |
| 8 | CHP | HARM | median | 64598 | 100280 | 4 |
| 8 | CHP | HARM | recent | 57773 | 89685 | 1995 |
| 8 | CHP | HEYW | max | 10974 | 14225 | 1966 |
| 8 | CHP | HEYW | median | 10974 | 14225 | 1 |
| 8 | CHP | HEYW | recent | 10974 | 14225 | 1966 |
| 8 | CHP | KITC | max | 1503 | 1886 | 1987 |
| 8 | CHP | KITC | median | 1503 | 1886 | 1 |
| 8 | CHP | KITC | recent | 1503 | 1886 | 1987 |
| 8 | CHP | NEWE | max | 10866 | 11388 | 1987 |
| 8 | CHP | NEWE | median | 10866 | 11388 | 1 |
| 8 | CHP | NEWE | recent | 10866 | 11388 | 1987 |
| 8 | CHP | TART | max | 389 | 394 | 1987 |
| 8 | CHP | TART | median | 309 | 312 | 2 |
| 8 | CHP | TART | recent | 389 | 394 | 1987 |
| 8 | CHP | TTOE | max | 15626 | 22500 | 1987 |
| 8 | CHP | TTOE | median | 13022 | 18750 | 2 |
| 8 | CHP | TTOE | recent | 15626 | 22500 | 1987 |
| 8 | CHP | WOOI | max | 157 | 701 | 1987 |
| 8 | CHP | WOOI | median | 157 | 701 | 1 |
| 8 | CHP | WOOI | recent | 157 | 701 | 1987 |
| 8 | CHP | ZEDI | max | 1034 | 1872 | 1987 |
| 8 | CHP | ZEDI | median | 1034 | 1872 | 1 |
| 8 | CHP | ZEDI | recent | 1034 | 1872 | 1987 |

# Antarctica marine IBA: 9

| Site code | 9 |
| --- | --- |
| Species | CHP,GEP |
| IBA criteria | A4: Congregations |
| Decimal Latitude | -62.188 |
| Decimal Longitude | -59.223 |
| Area (ha) | 67836.6 |
| Area (km2) | 678.366 |
| MPA Overlap | D1MPA |
| MPA Type | Proposed |
| MPA Zones | GPZ-SSI,KFZ-NWAP |


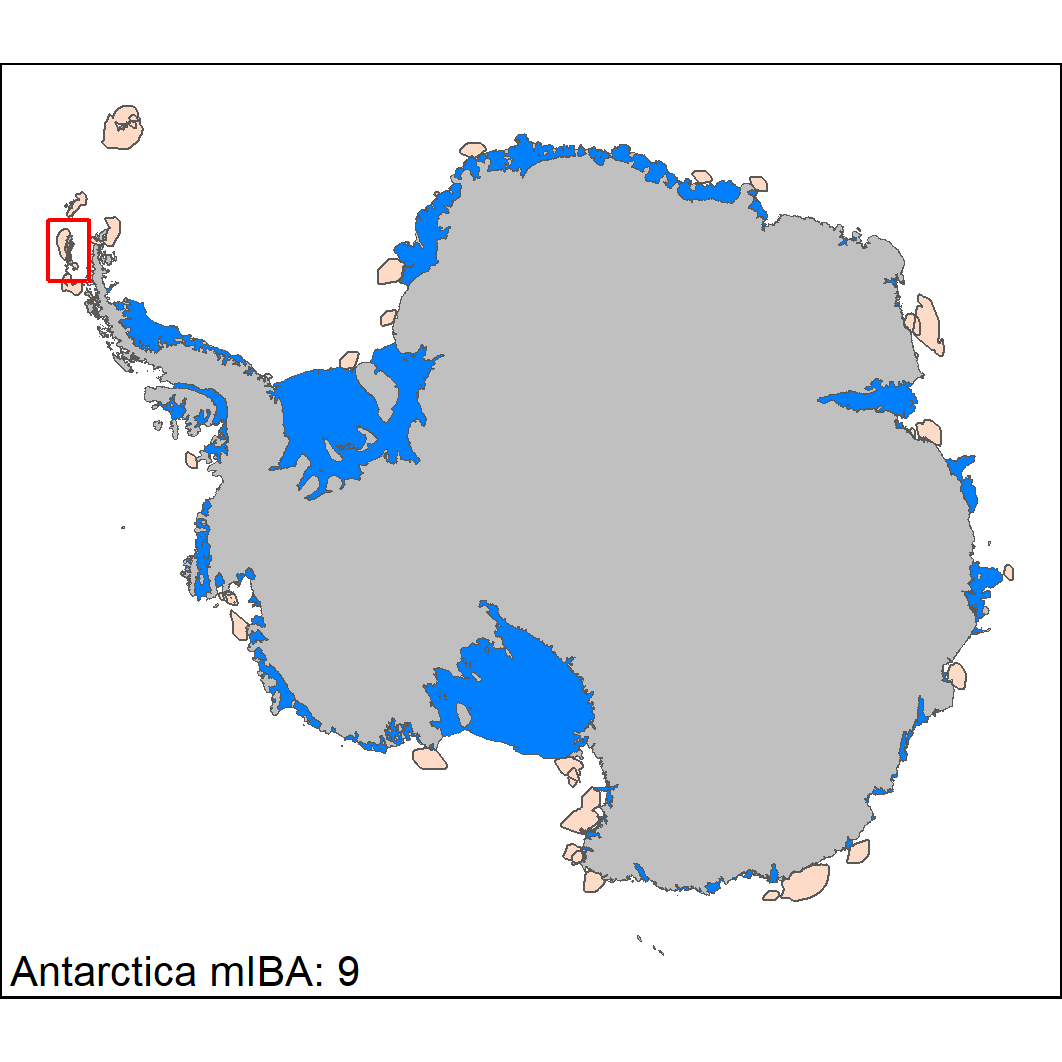


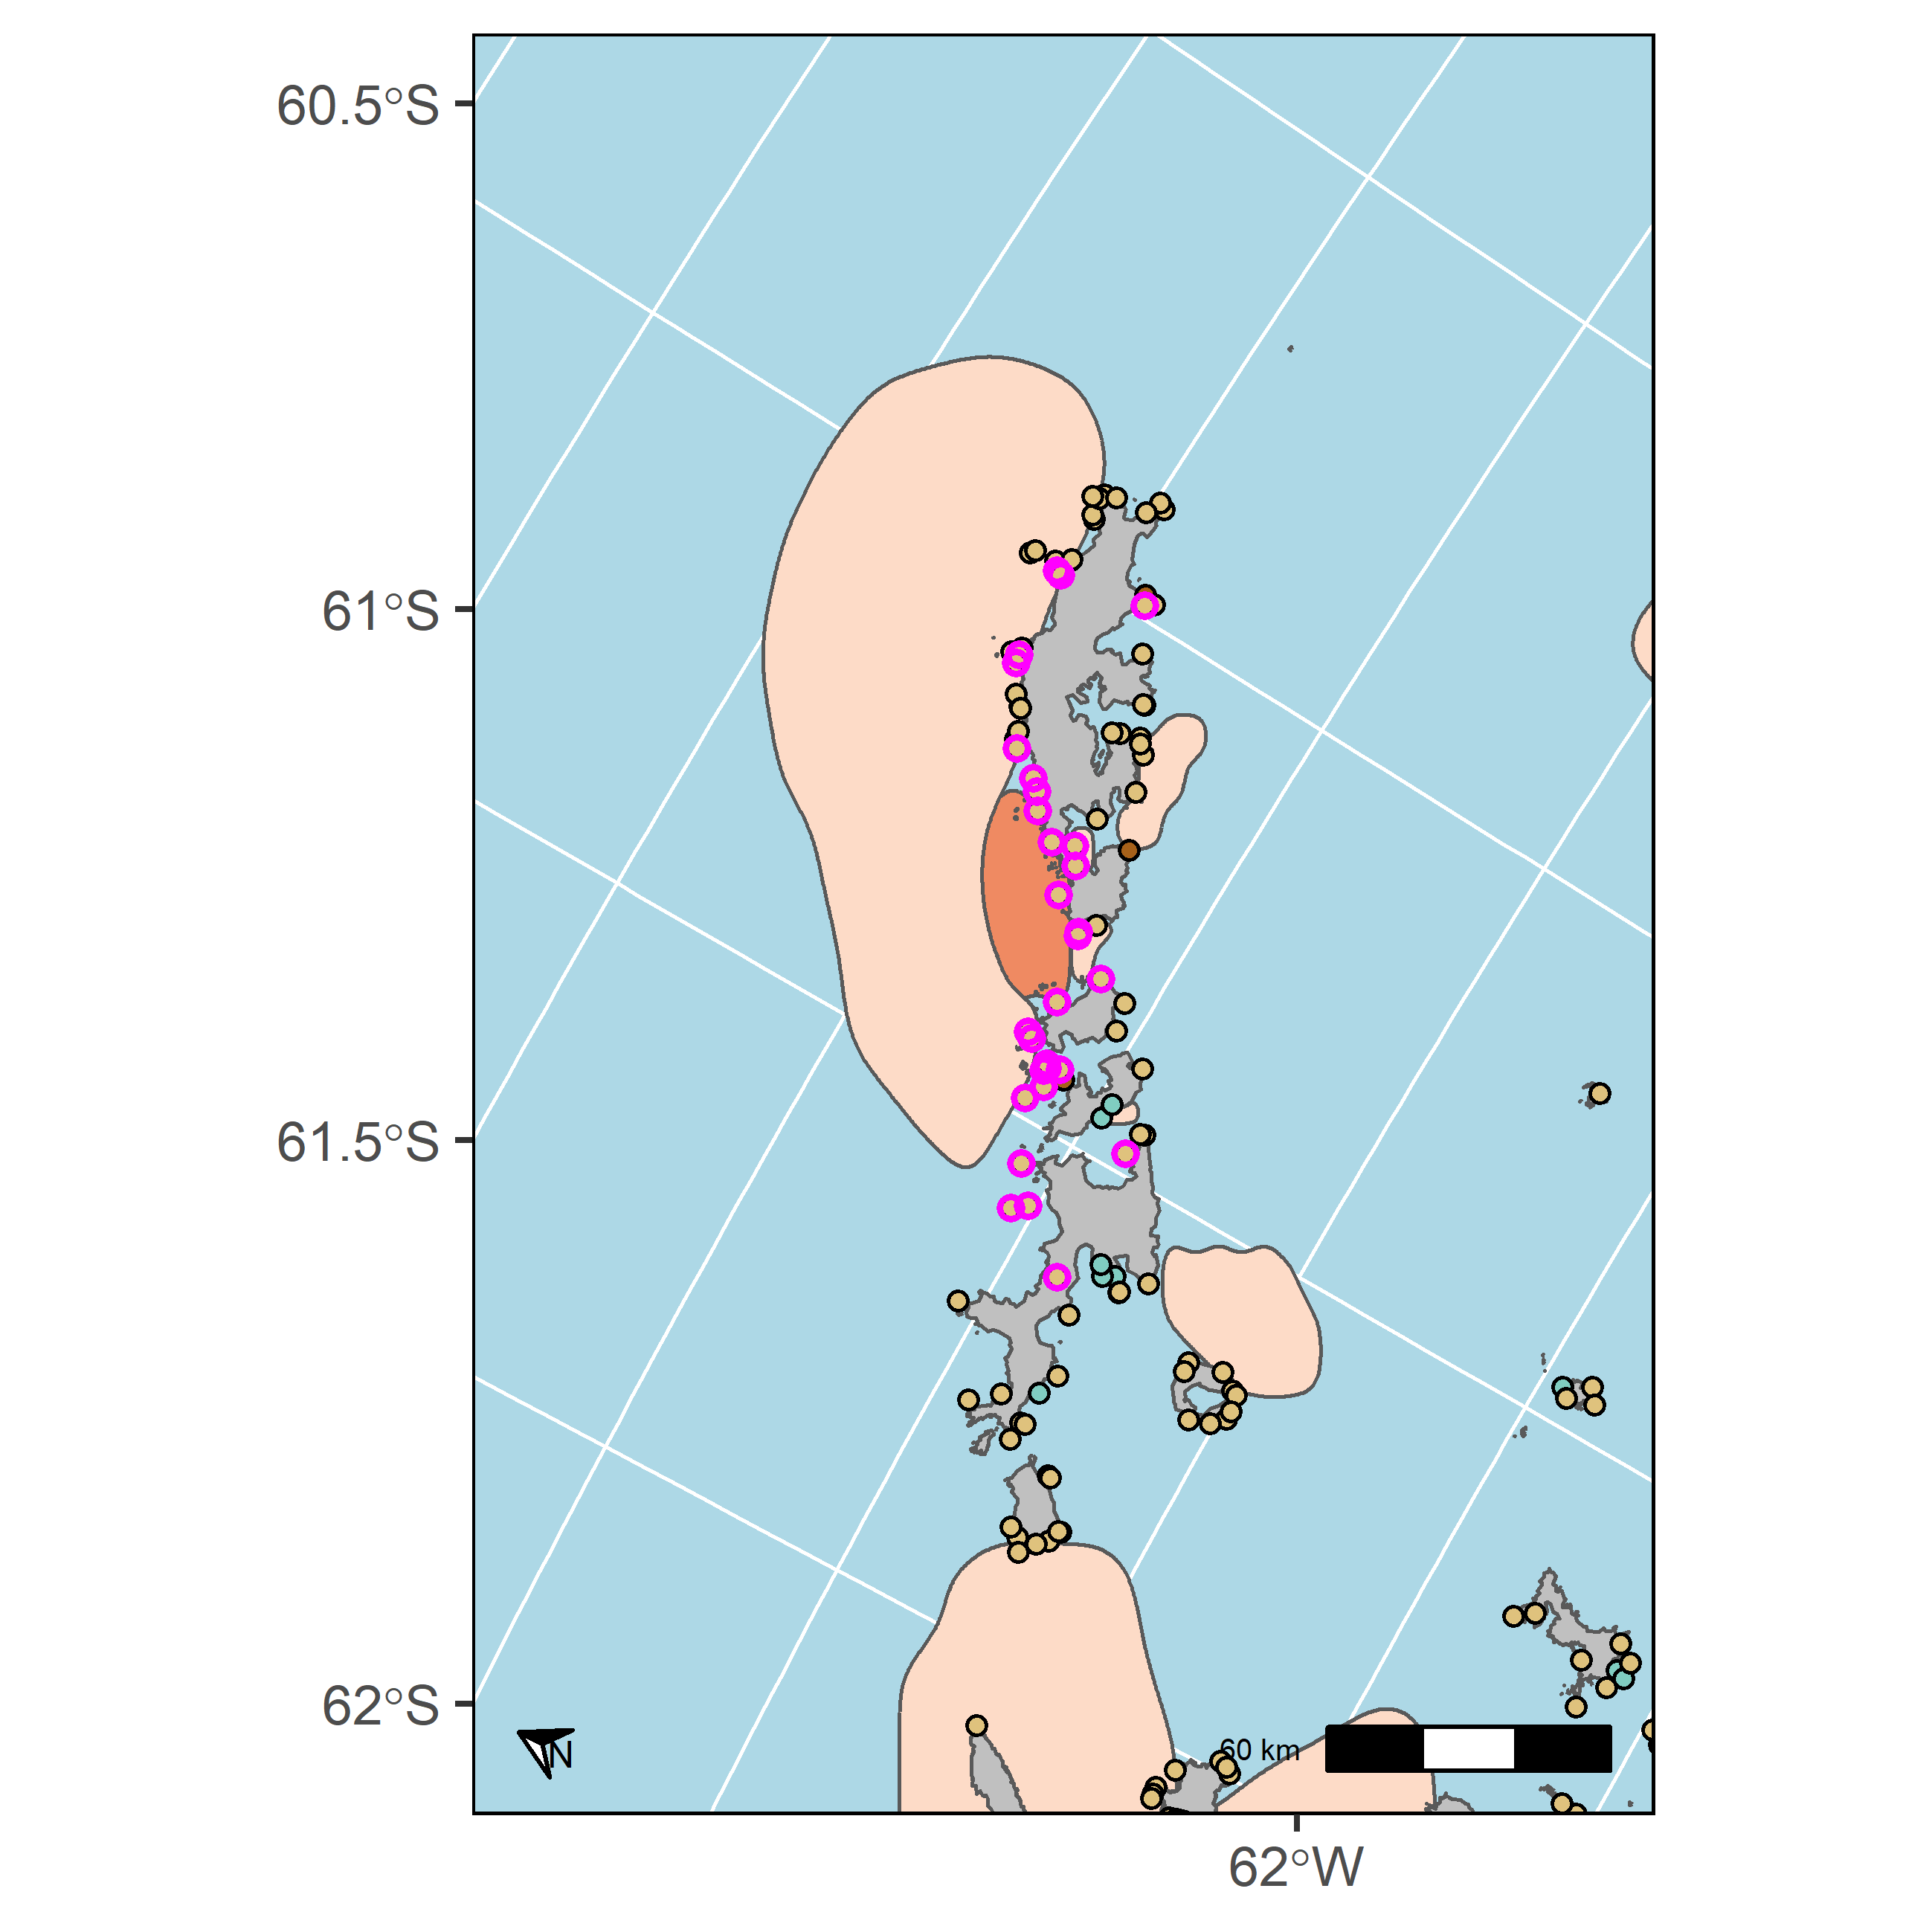


Figure A9.1: Focal Antarctica marine IBA 9 (orange polygon) for penguins, and other marine IBAs (light orange) for penguins identified during the project. Colonies circled in purple are those whose populations contributed to the marine IBA triggering IBA criteria A4 (>1% of the global population). See Table A9.2.

Table A9.1: Population estimates and count types (those that triggered IBA Criteria A4, >1% of global population) for key penguin species in Antarctic marine IBA 9. Key sources of colony input data associated with this marine IBA are detailed in Table A9.2. Population estimates refer to the lower and upper estimated number of adult breeding pairs likely to be using the marine IBA; derived from summing over all cells from individual colony density distribution surfaces which contributed to the identification of the marine IBA.

| Site code | Species | Count type | Lower | Upper |
| --- | --- | --- | --- | --- |
| 9 | CHP | min | 49772 | 93183 |
| 9 | CHP | max | 54873 | 285255 |
| 9 | CHP | median | 52277 | 129618 |
| 9 | CHP | recent | 54666 | 122681 |
| 9 | GEP | min | 4045 | 8721 |
| 9 | GEP | max | 4283 | 11129 |
| 9 | GEP | median | 4213 | 10001 |
| 9 | GEP | recent | 4143 | 10781 |

Table A9.2: Population estimates (adult breeding pairs) and count types from individual colony(ies) density distribution surfaces which contributed to the identification of marine IBA: 9. I.e. The lower and upper estimated number of adult breeding pairs from a given colony that may utilise the marine IBA. Note, the lower population estimate represents the lowest estimated number of breeding pairs from a given colony contributing to the delineation of the marine IBA site. The lower population estimate may therefore be zero when only part of the individual colony(ies) density distribution surface contributed to the marine IBA. *The Count Year for the median population estimate indicates the number of yearly population assessments for the given colony. Colony names are given in the ‘Colony Codes’ table at the end of this document.

| Site code | Species | Colony | Count type | Lower | Upper | Count year* |
| --- | --- | --- | --- | --- | --- | --- |
| 9 | CHP | AITC | min | 314 | 1795 | 2018 |
| 9 | CHP | AITC | max | 465 | 2656 | 2008 |
| 9 | CHP | AITC | median | 358 | 2046 | 4 |
| 9 | CHP | AITC | recent | 314 | 1795 | 2018 |
| 9 | CHP | ARDL | min | 7 | 7 | 2005 |
| 9 | CHP | ARDL | max | 190 | 190 | 1980 |
| 9 | CHP | ARDL | median | 30 | 30 | 19 |
| 9 | CHP | ARDL | recent | 12 | 12 | 2014 |
| 9 | CHP | BACH | min | 0 | 37 | 1980 |
| 9 | CHP | BACH | max | 0 | 37 | 1980 |
| 9 | CHP | BACH | median | 0 | 37 | 1 |
| 9 | CHP | BACH | recent | 0 | 37 | 1980 |
| 9 | CHP | BAIS | min | 19 | 163 | 2018 |
| 9 | CHP | BAIS | max | 19 | 163 | 2018 |
| 9 | CHP | BAIS | median | 19 | 163 | 1 |
| 9 | CHP | BAIS | recent | 19 | 163 | 2018 |
| 9 | CHP | BELL | min | 1681 | 3274 | 1980 |
| 9 | CHP | BELL | max | 1681 | 3274 | 1980 |
| 9 | CHP | BELL | median | 1681 | 3274 | 1 |
| 9 | CHP | BELL | recent | 1681 | 3274 | 1980 |
| 9 | CHP | CRIS | min | 188 | 1627 | 2018 |
| 9 | CHP | CRIS | max | 188 | 1627 | 2018 |
| 9 | CHP | CRIS | median | 188 | 1627 | 1 |
| 9 | CHP | CRIS | recent | 188 | 1627 | 2018 |
| 9 | CHP | DESO | min | 191 | 3962 | 1987 |
| 9 | CHP | DESO | max | 191 | 3962 | 1987 |
| 9 | CHP | DESO | median | 191 | 3962 | 1 |
| 9 | CHP | DESO | recent | 191 | 3962 | 1987 |
| 9 | CHP | FILD | min | 57 | 124 | 1987 |
| 9 | CHP | FILD | max | 57 | 124 | 1987 |
| 9 | CHP | FILD | median | 57 | 124 | 1 |
| 9 | CHP | FILD | recent | 57 | 124 | 1987 |
| 9 | CHP | HALF | min | 0 | 380 | 2019 |
| 9 | CHP | HALF | max | 0 | 1877 | 1987 |
| 9 | CHP | HALF | median | 0 | 633 | 15 |
| 9 | CHP | HALF | recent | 0 | 380 | 2019 |
| 9 | CHP | HARE | min | 935 | 1285 | 1987 |
| 9 | CHP | HARE | max | 935 | 1285 | 1987 |
| 9 | CHP | HARE | median | 935 | 1285 | 1 |
| 9 | CHP | HARE | recent | 935 | 1285 | 1987 |
| 9 | CHP | HARM | min | 19990 | 39479 | 1971 |
| 9 | CHP | HARM | max | 119939 | 236874 | 1987 |
| 9 | CHP | HARM | median | 40092 | 79179 | 4 |
| 9 | CHP | HARM | recent | 35856 | 70814 | 1995 |
| 9 | CHP | HEYW | min | 4814 | 17532 | 1966 |
| 9 | CHP | HEYW | max | 4814 | 17532 | 1966 |
| 9 | CHP | HEYW | median | 4814 | 17532 | 1 |
| 9 | CHP | HEYW | recent | 4814 | 17532 | 1966 |
| 9 | CHP | JORG | min | 261 | 2272 | 1999 |
| 9 | CHP | JORG | max | 261 | 2272 | 1999 |
| 9 | CHP | JORG | median | 261 | 2272 | 1 |
| 9 | CHP | JORG | recent | 261 | 2272 | 1999 |
| 9 | CHP | KITC | min | 534 | 1272 | 1987 |
| 9 | CHP | KITC | max | 534 | 1272 | 1987 |
| 9 | CHP | KITC | median | 534 | 1272 | 1 |
| 9 | CHP | KITC | recent | 534 | 1272 | 1987 |
| 9 | CHP | LEPP | min | 0 | 35 | 1980 |
| 9 | CHP | LEPP | max | 0 | 35 | 1980 |
| 9 | CHP | LEPP | median | 0 | 35 | 1 |
| 9 | CHP | LEPP | recent | 0 | 35 | 1980 |
| 9 | CHP | NCOI | min | 402 | 2071 | 1987 |
| 9 | CHP | NCOI | max | 402 | 2071 | 1987 |
| 9 | CHP | NCOI | median | 402 | 2071 | 1 |
| 9 | CHP | NCOI | recent | 402 | 2071 | 1987 |
| 9 | CHP | NEWE | min | 3625 | 17500 | 1987 |
| 9 | CHP | NEWE | max | 3625 | 17500 | 1987 |
| 9 | CHP | NEWE | median | 3625 | 17500 | 1 |
| 9 | CHP | NEWE | recent | 3625 | 17500 | 1987 |
| 9 | CHP | OWEN | min | 6973 | 6973 | 1980 |
| 9 | CHP | OWEN | max | 8089 | 8089 | 1987 |
| 9 | CHP | OWEN | median | 7531 | 7531 | 2 |
| 9 | CHP | OWEN | recent | 8089 | 8089 | 1987 |
| 9 | CHP | RIPP | min | 7426 | 14786 | 1987 |
| 9 | CHP | RIPP | max | 7426 | 14786 | 1987 |
| 9 | CHP | RIPP | median | 7426 | 14786 | 1 |
| 9 | CHP | RIPP | recent | 7426 | 14786 | 1987 |
| 9 | CHP | ROME | min | 183 | 289 | 1987 |
| 9 | CHP | ROME | max | 183 | 289 | 1987 |
| 9 | CHP | ROME | median | 183 | 289 | 1 |
| 9 | CHP | ROME | recent | 183 | 289 | 1987 |
| 9 | CHP | RZEP | min | 2718 | 3937 | 1980 |
| 9 | CHP | RZEP | max | 2718 | 3937 | 1980 |
| 9 | CHP | RZEP | median | 2718 | 3937 | 1 |
| 9 | CHP | RZEP | recent | 2718 | 3937 | 1980 |
| 9 | CHP | STIG | min | 2833 | 5490 | 1980 |
| 9 | CHP | STIG | max | 3974 | 7703 | 1987 |
| 9 | CHP | STIG | median | 3403 | 6597 | 2 |
| 9 | CHP | STIG | recent | 3974 | 7703 | 1987 |
| 9 | CHP | STIS | min | 3 | 3610 | 1989 |
| 9 | CHP | STIS | max | 3 | 3610 | 1989 |
| 9 | CHP | STIS | median | 3 | 3610 | 1 |
| 9 | CHP | STIS | recent | 3 | 3610 | 1989 |
| 9 | CHP | TAIS | min | 110 | 951 | 2018 |
| 9 | CHP | TAIS | max | 110 | 951 | 2018 |
| 9 | CHP | TAIS | median | 110 | 951 | 1 |
| 9 | CHP | TAIS | recent | 110 | 951 | 2018 |
| 9 | CHP | TART | min | 229 | 7633 | 1980 |
| 9 | CHP | TART | max | 391 | 13035 | 1987 |
| 9 | CHP | TART | median | 310 | 10334 | 2 |
| 9 | CHP | TART | recent | 391 | 13035 | 1987 |
| 9 | CHP | TURR | max | 10 | 36 | 1980 |
| 9 | CHP | TURR | median | 1 | 2 | 10 |
| 9 | CHP | UIEL | min | 0 | 46 | 1987 |
| 9 | CHP | UIEL | max | 0 | 46 | 1987 |
| 9 | CHP | UIEL | median | 0 | 46 | 1 |
| 9 | CHP | UIEL | recent | 0 | 46 | 1987 |
| 9 | CHP | UNAI | min | 8 | 73 | 2018 |
| 9 | CHP | UNAI | max | 8 | 73 | 2018 |
| 9 | CHP | UNAI | median | 8 | 73 | 1 |
| 9 | CHP | UNAI | recent | 8 | 73 | 2018 |
| 9 | CHP | WITH | min | 10868 | 20000 | 1979 |
| 9 | CHP | WITH | max | 10868 | 20000 | 1979 |
| 9 | CHP | WITH | median | 10868 | 20000 | 1 |
| 9 | CHP | WITH | recent | 10868 | 20000 | 1979 |
| 9 | CHP | WOOI | min | 1 | 1097 | 1987 |
| 9 | CHP | WOOI | max | 1 | 1097 | 1987 |
| 9 | CHP | WOOI | median | 1 | 1097 | 1 |
| 9 | CHP | WOOI | recent | 1 | 1097 | 1987 |
| 9 | CHP | ZAWA | min | 249 | 336 | 1980 |
| 9 | CHP | ZAWA | max | 249 | 336 | 1980 |
| 9 | CHP | ZAWA | median | 249 | 336 | 1 |
| 9 | CHP | ZAWA | recent | 249 | 336 | 1980 |
| 9 | CHP | ZEDI | min | 2 | 2490 | 1987 |
| 9 | CHP | ZEDI | max | 2 | 2490 | 1987 |
| 9 | CHP | ZEDI | median | 2 | 2490 | 1 |
| 9 | CHP | ZEDI | recent | 2 | 2490 | 1987 |
| 9 | GEP | AITC | min | 0 | 427 | 1999 |
| 9 | GEP | AITC | max | 0 | 802 | 2011 |
| 9 | GEP | AITC | median | 0 | 662 | 13 |
| 9 | GEP | AITC | recent | 0 | 704 | 2018 |
| 9 | GEP | ARDL | min | 1161 | 1161 | 1983 |
| 9 | GEP | ARDL | max | 3598 | 3598 | 2002 |
| 9 | GEP | ARDL | median | 2470 | 2470 | 19 |
| 9 | GEP | ARDL | recent | 3250 | 3250 | 2005 |
| 9 | GEP | HARM | min | 751 | 2470 | 1995 |
| 9 | GEP | HARM | max | 887 | 2920 | 1988 |
| 9 | GEP | HARM | median | 819 | 2695 | 2 |
| 9 | GEP | HARM | recent | 751 | 2470 | 1995 |
| 9 | GEP | RIPP | min | 2271 | 7531 | 1966 |
| 9 | GEP | RIPP | max | 2271 | 7531 | 1966 |
| 9 | GEP | RIPP | median | 2271 | 7531 | 1 |
| 9 | GEP | RIPP | recent | 2271 | 7531 | 1966 |

# Antarctica marine IBA: 10

| Site code | 10 |
| --- | --- |
| Species | CHP |
| IBA criteria | A4: Congregations |
| Decimal Latitude | -61.834 |
| Decimal Longitude | -58.774 |
| Area (ha) | 808126 |
| Area (km2) | 8081.26 |
| MPA Overlap | D1MPA |
| MPA Type | Proposed |
| MPA Zones | GPZ-SSI,KFZ-NWAP |


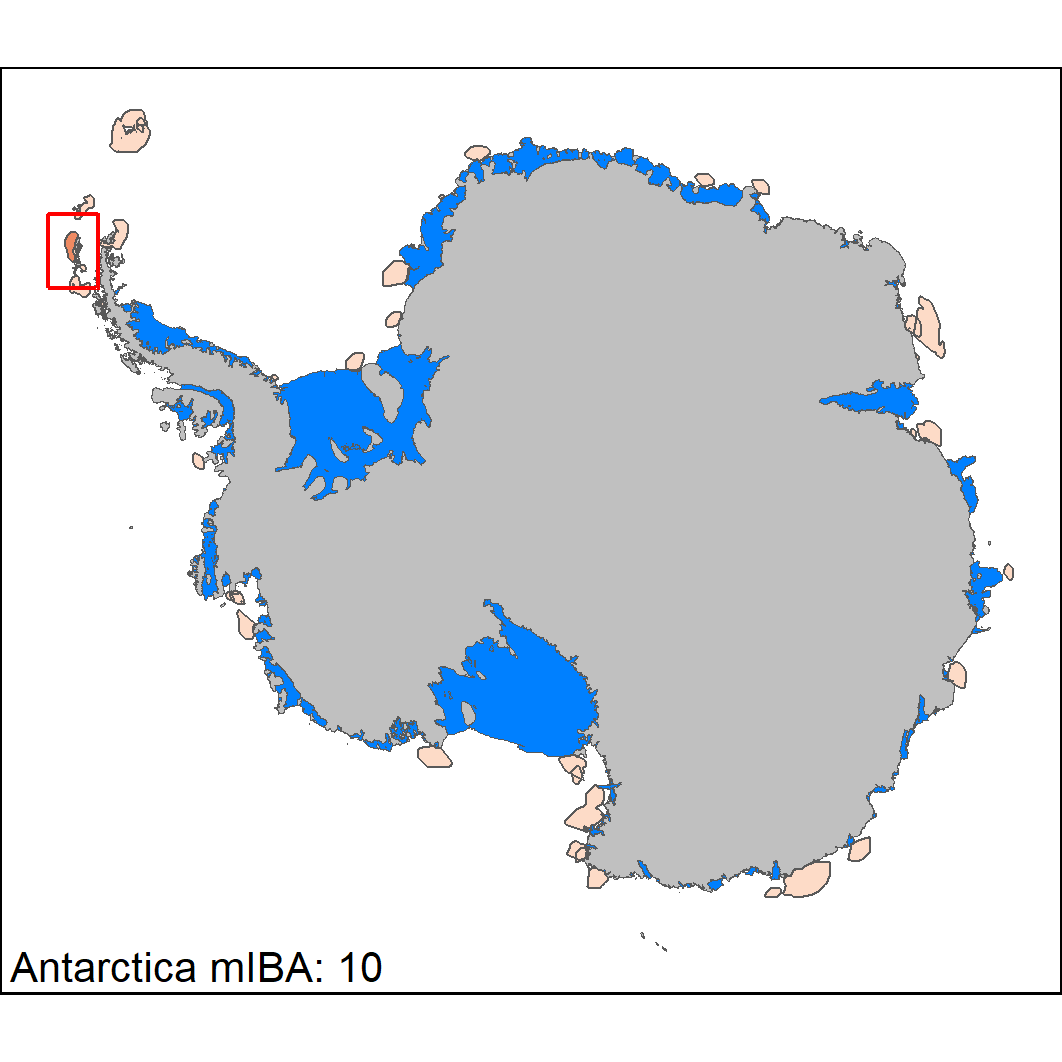


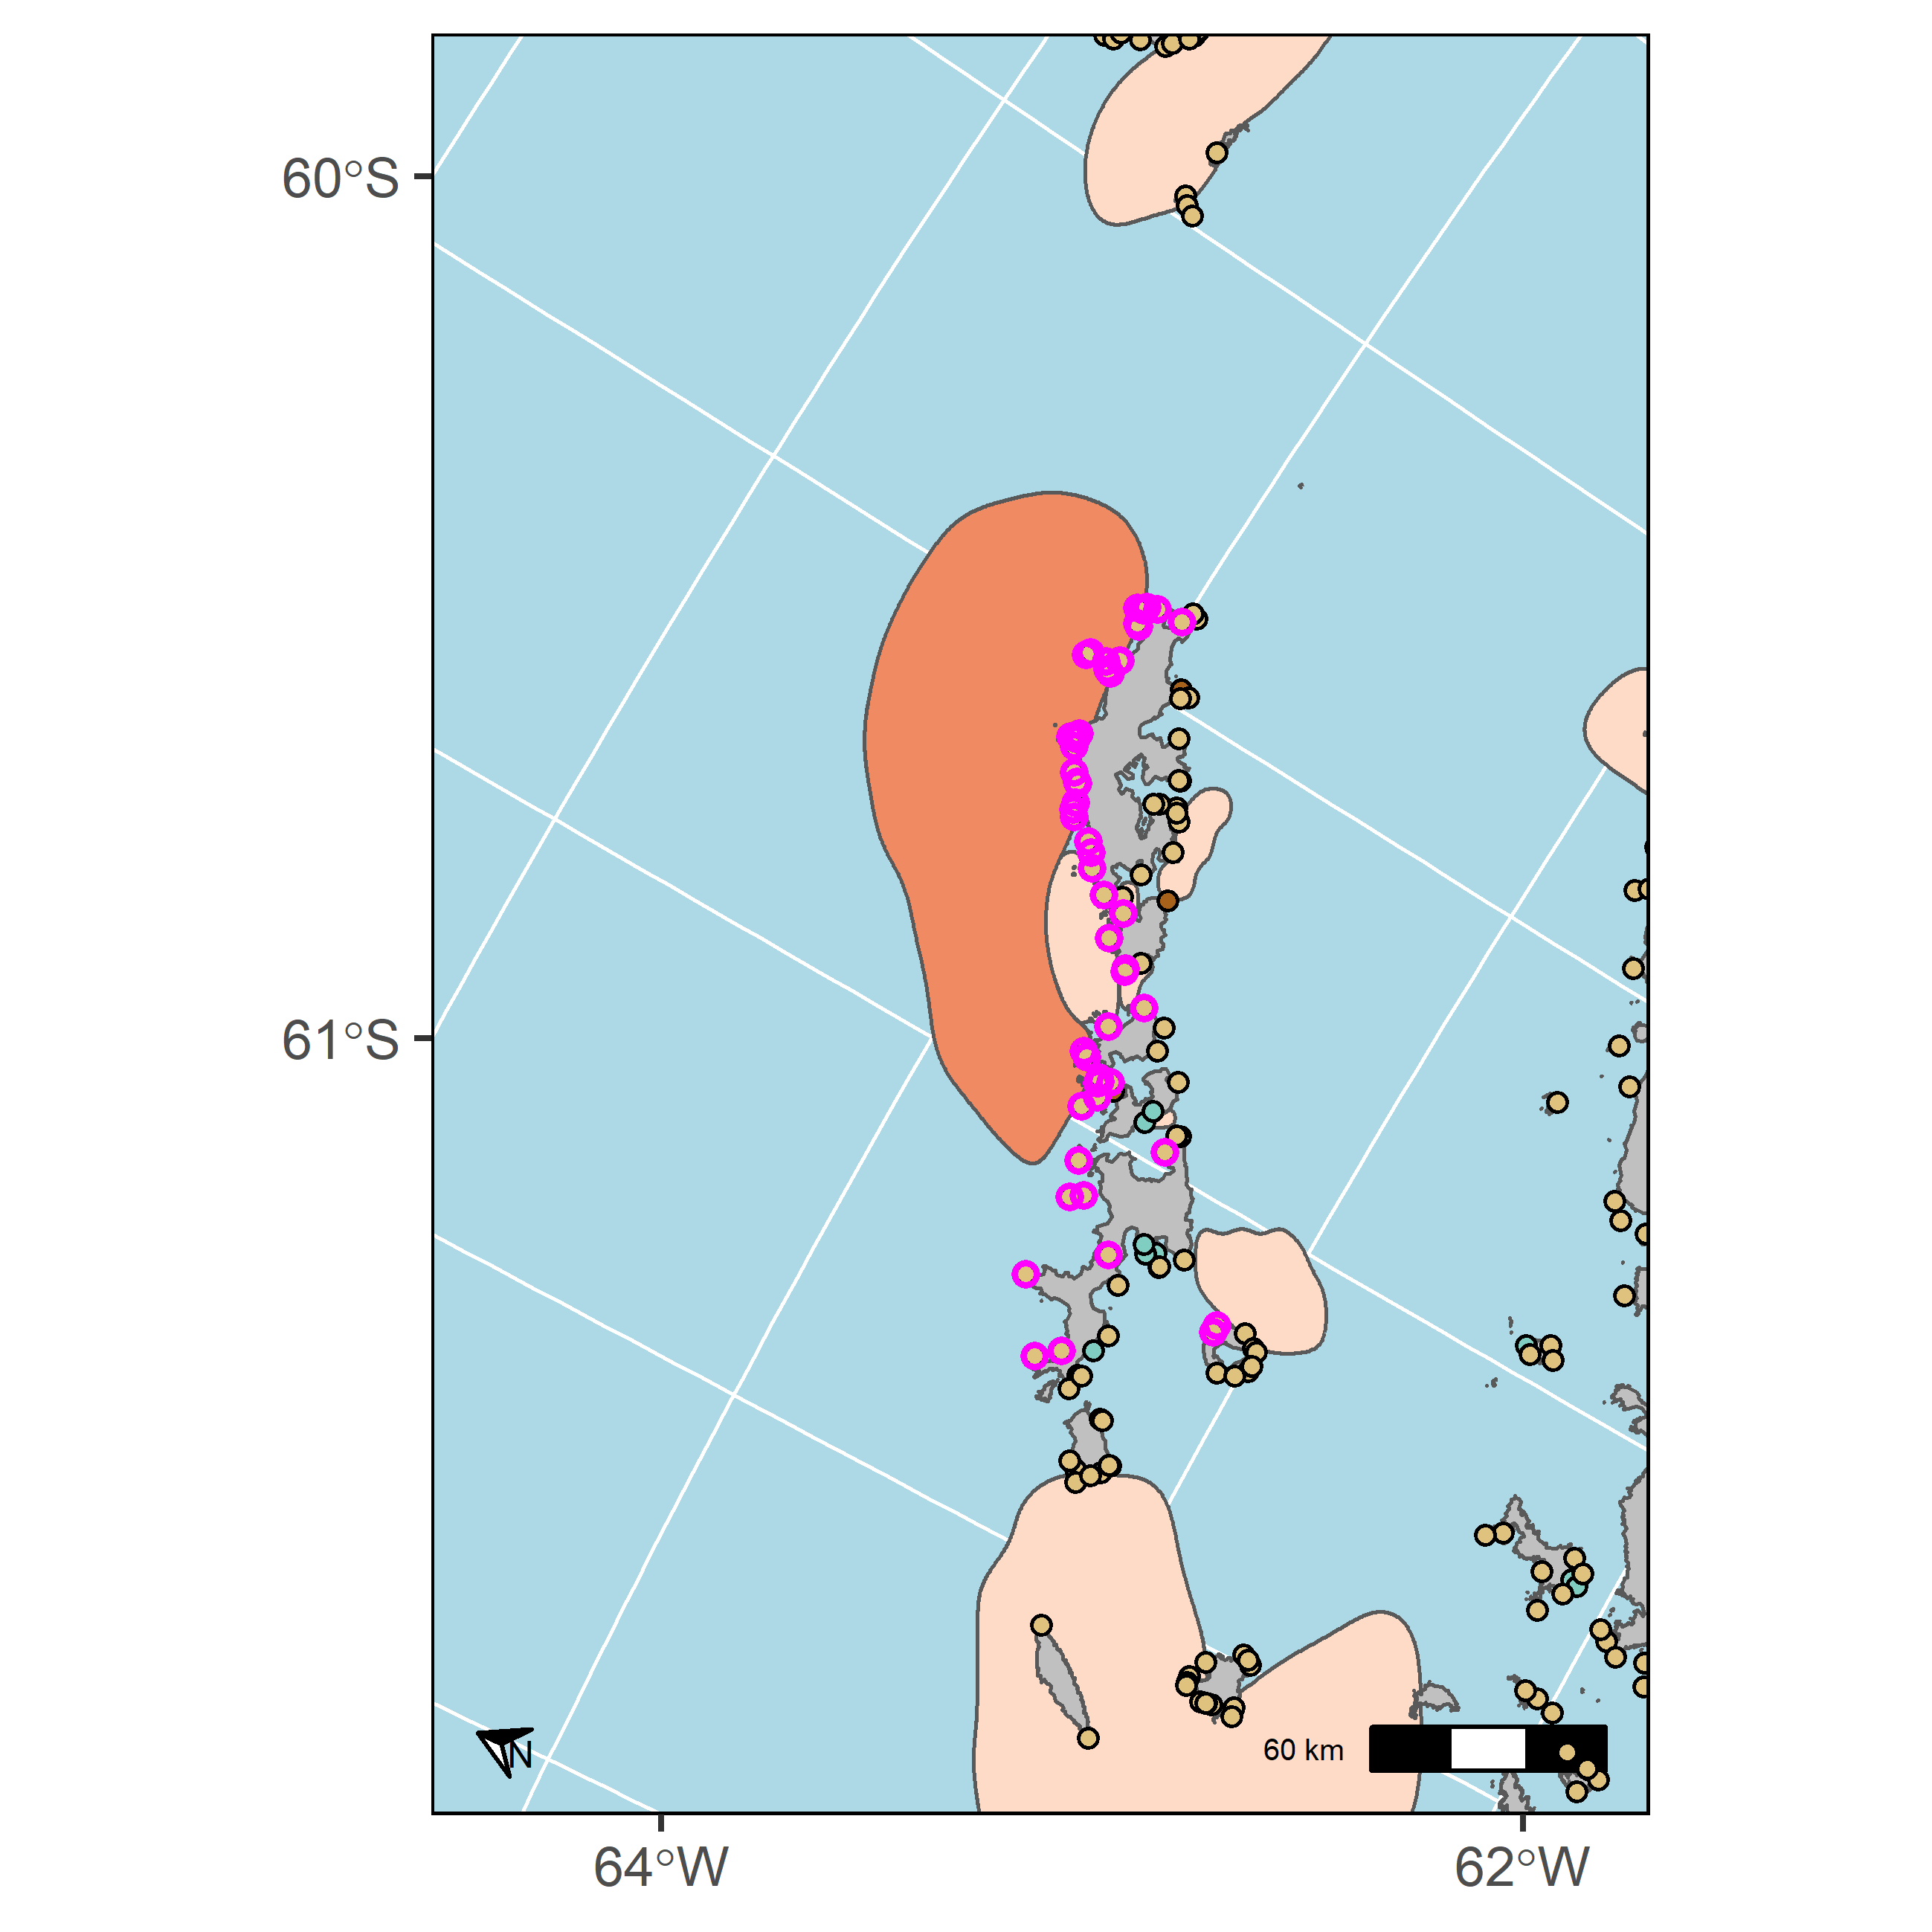


Figure A10.1: Focal Antarctica marine IBA 10 (orange polygon) for penguins, and other marine IBAs (light orange) for penguins identified during the project. Colonies circled in purple are those whose populations contributed to the marine IBA triggering IBA criteria A4 (>1% of the global population). See Table A10.2.

Table A10.1: Population estimates and count types (those that triggered IBA Criteria A4, >1% of global population) for key penguin species in Antarctic marine IBA 10. Key sources of colony input data associated with this marine IBA are detailed in Table A10.2. Population estimates refer to the lower and upper estimated number of adult breeding pairs likely to be using the marine IBA; derived from summing over all cells from individual colony density distribution surfaces which contributed to the identification of the marine IBA.

| Site code | Species | Count type | Lower | Upper |
| --- | --- | --- | --- | --- |
| 10 | CHP | max | 38544 | 318626 |
| 10 | CHP | median | 34111 | 234441 |
| 10 | CHP | recent | 34247 | 317566 |

Table A10.2: Population estimates (adult breeding pairs) and count types from individual colony(ies) density distribution surfaces which contributed to the identification of marine IBA: 10. I.e. The lower and upper estimated number of adult breeding pairs from a given colony that may utilise the marine IBA. Note, the lower population estimate represents the lowest estimated number of breeding pairs from a given colony contributing to the delineation of the marine IBA site. The lower population estimate may therefore be zero when only part of the individual colony(ies) density distribution surface contributed to the marine IBA. *The Count Year for the median population estimate indicates the number of yearly population assessments for the given colony. Colony names are given in the ‘Colony Codes’ table at the end of this document.

| Site code | Species | Colony | Count type | Lower | Upper | Count year* |
| --- | --- | --- | --- | --- | --- | --- |
| 10 | CHP | AITC | max | 0 | 3773 | 2008 |
| 10 | CHP | AITC | median | 0 | 2906 | 4 |
| 10 | CHP | AITC | recent | 0 | 2549 | 2018 |
| 10 | CHP | BACH | max | 0 | 230 | 1980 |
| 10 | CHP | BACH | median | 0 | 230 | 1 |
| 10 | CHP | BACH | recent | 0 | 230 | 1980 |
| 10 | CHP | BAIS | max | 3 | 279 | 2018 |
| 10 | CHP | BAIS | median | 3 | 279 | 1 |
| 10 | CHP | BAIS | recent | 3 | 279 | 2018 |
| 10 | CHP | BELL | max | 34 | 2143 | 1980 |
| 10 | CHP | BELL | median | 34 | 2143 | 1 |
| 10 | CHP | BELL | recent | 34 | 2143 | 1980 |
| 10 | CHP | BRIM | max | 0 | 13020 | 1980 |
| 10 | CHP | BRIM | median | 0 | 11510 | 2 |
| 10 | CHP | BRIM | recent | 0 | 10000 | 1987 |
| 10 | CHP | BRPW | max | 1 | 5312 | 1987 |
| 10 | CHP | BRPW | median | 0 | 4484 | 2 |
| 10 | CHP | BRPW | recent | 1 | 5312 | 1987 |
| 10 | CHP | CARO | max | 527 | 3335 | 1987 |
| 10 | CHP | CARO | median | 527 | 3335 | 1 |
| 10 | CHP | CARO | recent | 527 | 3335 | 1987 |
| 10 | CHP | CIPT | max | 11 | 955 | 1980 |
| 10 | CHP | CIPT | median | 11 | 955 | 1 |
| 10 | CHP | CIPT | recent | 11 | 955 | 1980 |
| 10 | CHP | CPTW | max | 0 | 280 | 1980 |
| 10 | CHP | CPTW | median | 0 | 280 | 1 |
| 10 | CHP | CPTW | recent | 0 | 280 | 1980 |
| 10 | CHP | CRIS | max | 31 | 2674 | 2018 |
| 10 | CHP | CRIS | median | 31 | 2674 | 1 |
| 10 | CHP | CRIS | recent | 31 | 2674 | 2018 |
| 10 | CHP | DAVE | max | 281 | 25000 | 1987 |
| 10 | CHP | DAVE | median | 144 | 12780 | 2 |
| 10 | CHP | DAVE | recent | 281 | 25000 | 1987 |
| 10 | CHP | DESO | max | 188 | 11581 | 1987 |
| 10 | CHP | DESO | median | 188 | 11581 | 1 |
| 10 | CHP | DESO | recent | 188 | 11581 | 1987 |
| 10 | CHP | EMER | max | 0 | 155 | 1987 |
| 10 | CHP | EMER | median | 0 | 78 | 2 |
| 10 | CHP | EMER | recent | 0 | 155 | 1987 |
| 10 | CHP | FILD | max | 2 | 83 | 1987 |
| 10 | CHP | FILD | median | 2 | 83 | 1 |
| 10 | CHP | FILD | recent | 2 | 83 | 1987 |
| 10 | CHP | FRPT | max | 2668 | 49410 | 1980 |
| 10 | CHP | FRPT | median | 2668 | 49410 | 1 |
| 10 | CHP | FRPT | recent | 2668 | 49410 | 1980 |
| 10 | CHP | GAMP | max | 10 | 76 | 1980 |
| 10 | CHP | GAMP | median | 10 | 76 | 1 |
| 10 | CHP | GAMP | recent | 10 | 76 | 1980 |
| 10 | CHP | HALF | max | 62 | 2334 | 1987 |
| 10 | CHP | HALF | median | 21 | 787 | 15 |
| 10 | CHP | HALF | recent | 13 | 473 | 2019 |
| 10 | CHP | HARE | max | 541 | 851 | 1987 |
| 10 | CHP | HARE | median | 541 | 851 | 1 |
| 10 | CHP | HARE | recent | 541 | 851 | 1987 |
| 10 | CHP | HARM | max | 18 | 161562 | 1987 |
| 10 | CHP | HARM | median | 6 | 54005 | 4 |
| 10 | CHP | HARM | recent | 5 | 48299 | 1995 |
| 10 | CHP | HEYW | max | 0 | 23000 | 1966 |
| 10 | CHP | HEYW | median | 0 | 23000 | 1 |
| 10 | CHP | HEYW | recent | 0 | 23000 | 1966 |
| 10 | CHP | IOLB | max | 144 | 12630 | 1980 |
| 10 | CHP | IOLB | median | 144 | 12630 | 1 |
| 10 | CHP | IOLB | recent | 144 | 12630 | 1980 |
| 10 | CHP | JORG | max | 43 | 3733 | 1999 |
| 10 | CHP | JORG | median | 43 | 3733 | 1 |
| 10 | CHP | JORG | recent | 43 | 3733 | 1999 |
| 10 | CHP | KELL | max | 430 | 40000 | 1987 |
| 10 | CHP | KELL | median | 359 | 33445 | 2 |
| 10 | CHP | KELL | recent | 430 | 40000 | 1987 |
| 10 | CHP | KITC | max | 1 | 461 | 1987 |
| 10 | CHP | KITC | median | 1 | 461 | 1 |
| 10 | CHP | KITC | recent | 1 | 461 | 1987 |
| 10 | CHP | LAIR | max | 0 | 11 | 1987 |
| 10 | CHP | LAIR | median | 0 | 11 | 1 |
| 10 | CHP | LAIR | recent | 0 | 11 | 1987 |
| 10 | CHP | LEPP | max | 0 | 230 | 1980 |
| 10 | CHP | LEPP | median | 0 | 230 | 1 |
| 10 | CHP | LEPP | recent | 0 | 230 | 1980 |
| 10 | CHP | LITW | max | 95 | 8500 | 1980 |
| 10 | CHP | LITW | median | 95 | 8500 | 1 |
| 10 | CHP | LITW | recent | 95 | 8500 | 1980 |
| 10 | CHP | MPTE | max | 0 | 84 | 2011 |
| 10 | CHP | MPTE | median | 0 | 84 | 1 |
| 10 | CHP | MPTE | recent | 0 | 84 | 2011 |
| 10 | CHP | MPTW | max | 29 | 278 | 2011 |
| 10 | CHP | MPTW | median | 17 | 162 | 2 |
| 10 | CHP | MPTW | recent | 29 | 278 | 2011 |
| 10 | CHP | NCOI | max | 33 | 2405 | 1987 |
| 10 | CHP | NCOI | median | 33 | 2405 | 1 |
| 10 | CHP | NCOI | recent | 33 | 2405 | 1987 |
| 10 | CHP | NEWE | max | 0 | 12719 | 1987 |
| 10 | CHP | NEWE | median | 0 | 12719 | 1 |
| 10 | CHP | NEWE | recent | 0 | 12719 | 1987 |
| 10 | CHP | NFOR | max | 3 | 60000 | 1987 |
| 10 | CHP | NFOR | median | 2 | 41643 | 2 |
| 10 | CHP | NFOR | recent | 3 | 60000 | 1987 |
| 10 | CHP | OWEN | max | 263 | 25000 | 1987 |
| 10 | CHP | OWEN | median | 245 | 23276 | 2 |
| 10 | CHP | OWEN | recent | 263 | 25000 | 1987 |
| 10 | CHP | POPO | max | 2116 | 175250 | 1987 |
| 10 | CHP | POPO | median | 1395 | 115556 | 2 |
| 10 | CHP | POPO | recent | 2116 | 175250 | 1987 |
| 10 | CHP | PYRI | max | 41 | 307 | 1980 |
| 10 | CHP | PYRI | median | 41 | 307 | 1 |
| 10 | CHP | PYRI | recent | 41 | 307 | 1980 |
| 10 | CHP | RIDL | max | 451 | 4035 | 1980 |
| 10 | CHP | RIDL | median | 451 | 4035 | 1 |
| 10 | CHP | RIDL | recent | 451 | 4035 | 1980 |
| 10 | CHP | RIPP | max | 2 | 8220 | 1987 |
| 10 | CHP | RIPP | median | 2 | 8220 | 1 |
| 10 | CHP | RIPP | recent | 2 | 8220 | 1987 |
| 10 | CHP | ROME | max | 6 | 500 | 1987 |
| 10 | CHP | ROME | median | 6 | 500 | 1 |
| 10 | CHP | ROME | recent | 6 | 500 | 1987 |
| 10 | CHP | RZEP | max | 0 | 3625 | 1980 |
| 10 | CHP | RZEP | median | 0 | 3625 | 1 |
| 10 | CHP | RZEP | recent | 0 | 3625 | 1980 |
| 10 | CHP | SHIR | max | 245 | 9881 | 1987 |
| 10 | CHP | SHIR | median | 66 | 2677 | 15 |
| 10 | CHP | SHIR | recent | 49 | 1961 | 2010 |
| 10 | CHP | STIG | max | 1 | 13550 | 1987 |
| 10 | CHP | STIG | median | 1 | 11604 | 2 |
| 10 | CHP | STIG | recent | 1 | 13550 | 1987 |
| 10 | CHP | STIS | max | 0 | 5830 | 1989 |
| 10 | CHP | STIS | median | 0 | 5830 | 1 |
| 10 | CHP | STIS | recent | 0 | 5830 | 1989 |
| 10 | CHP | TAIS | max | 18 | 1586 | 2018 |
| 10 | CHP | TAIS | median | 18 | 1586 | 1 |
| 10 | CHP | TAIS | recent | 18 | 1586 | 2018 |
| 10 | CHP | TART | max | 383 | 35000 | 1987 |
| 10 | CHP | TART | median | 304 | 27747 | 2 |
| 10 | CHP | TART | recent | 383 | 35000 | 1987 |
| 10 | CHP | TAYL | max | 188 | 459 | 1980 |
| 10 | CHP | TAYL | median | 94 | 230 | 2 |
| 10 | CHP | TROW | max | 1289 | 3764 | 1980 |
| 10 | CHP | TROW | median | 849 | 2479 | 2 |
| 10 | CHP | TROW | recent | 409 | 1193 | 1987 |
| 10 | CHP | UIEL | max | 0 | 197 | 1987 |
| 10 | CHP | UIEL | median | 0 | 197 | 1 |
| 10 | CHP | UIEL | recent | 0 | 197 | 1987 |
| 10 | CHP | UNAI | max | 1 | 123 | 2018 |
| 10 | CHP | UNAI | median | 1 | 123 | 1 |
| 10 | CHP | UNAI | recent | 1 | 123 | 2018 |
| 10 | CHP | WINW | max | 0 | 12 | 1987 |
| 10 | CHP | WINW | median | 0 | 12 | 1 |
| 10 | CHP | WINW | recent | 0 | 12 | 1987 |
| 10 | CHP | WITH | max | 0 | 11116 | 1979 |
| 10 | CHP | WITH | median | 0 | 11116 | 1 |
| 10 | CHP | WITH | recent | 0 | 11116 | 1979 |
| 10 | CHP | WOOI | max | 0 | 3257 | 1987 |
| 10 | CHP | WOOI | median | 0 | 3257 | 1 |
| 10 | CHP | WOOI | recent | 0 | 3257 | 1987 |
| 10 | CHP | WORL | max | 23 | 216 | 1980 |
| 10 | CHP | WORL | median | 23 | 216 | 1 |
| 10 | CHP | WORL | recent | 23 | 216 | 1980 |
| 10 | CHP | ZAWA | max | 5 | 359 | 1980 |
| 10 | CHP | ZAWA | median | 5 | 359 | 1 |
| 10 | CHP | ZAWA | recent | 5 | 359 | 1980 |
| 10 | CHP | ZEDI | max | 0 | 5741 | 1987 |
| 10 | CHP | ZEDI | median | 0 | 5741 | 1 |
| 10 | CHP | ZEDI | recent | 0 | 5741 | 1987 |

# Antarctica marine IBA: 11

| Site code | 11 |
| --- | --- |
| Species | GEP |
| IBA criteria | A4: Congregations |
| Decimal Latitude | -62.229 |
| Decimal Longitude | -58.92 |
| Area (ha) | 3358.37 |
| Area (km2) | 33.5837 |
| MPA Overlap | D1MPA |
| MPA Type | Proposed |
| MPA Zones | KFZ-NWAP |


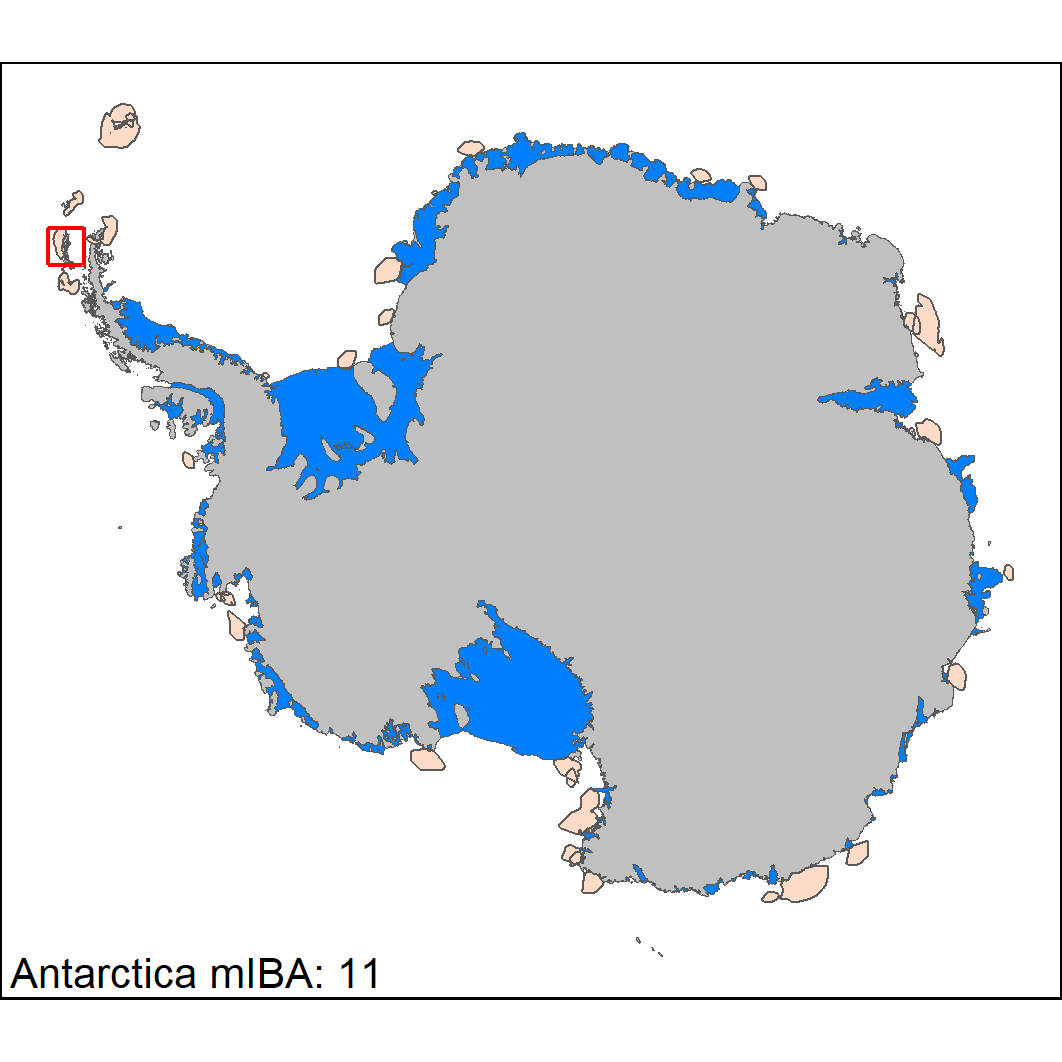


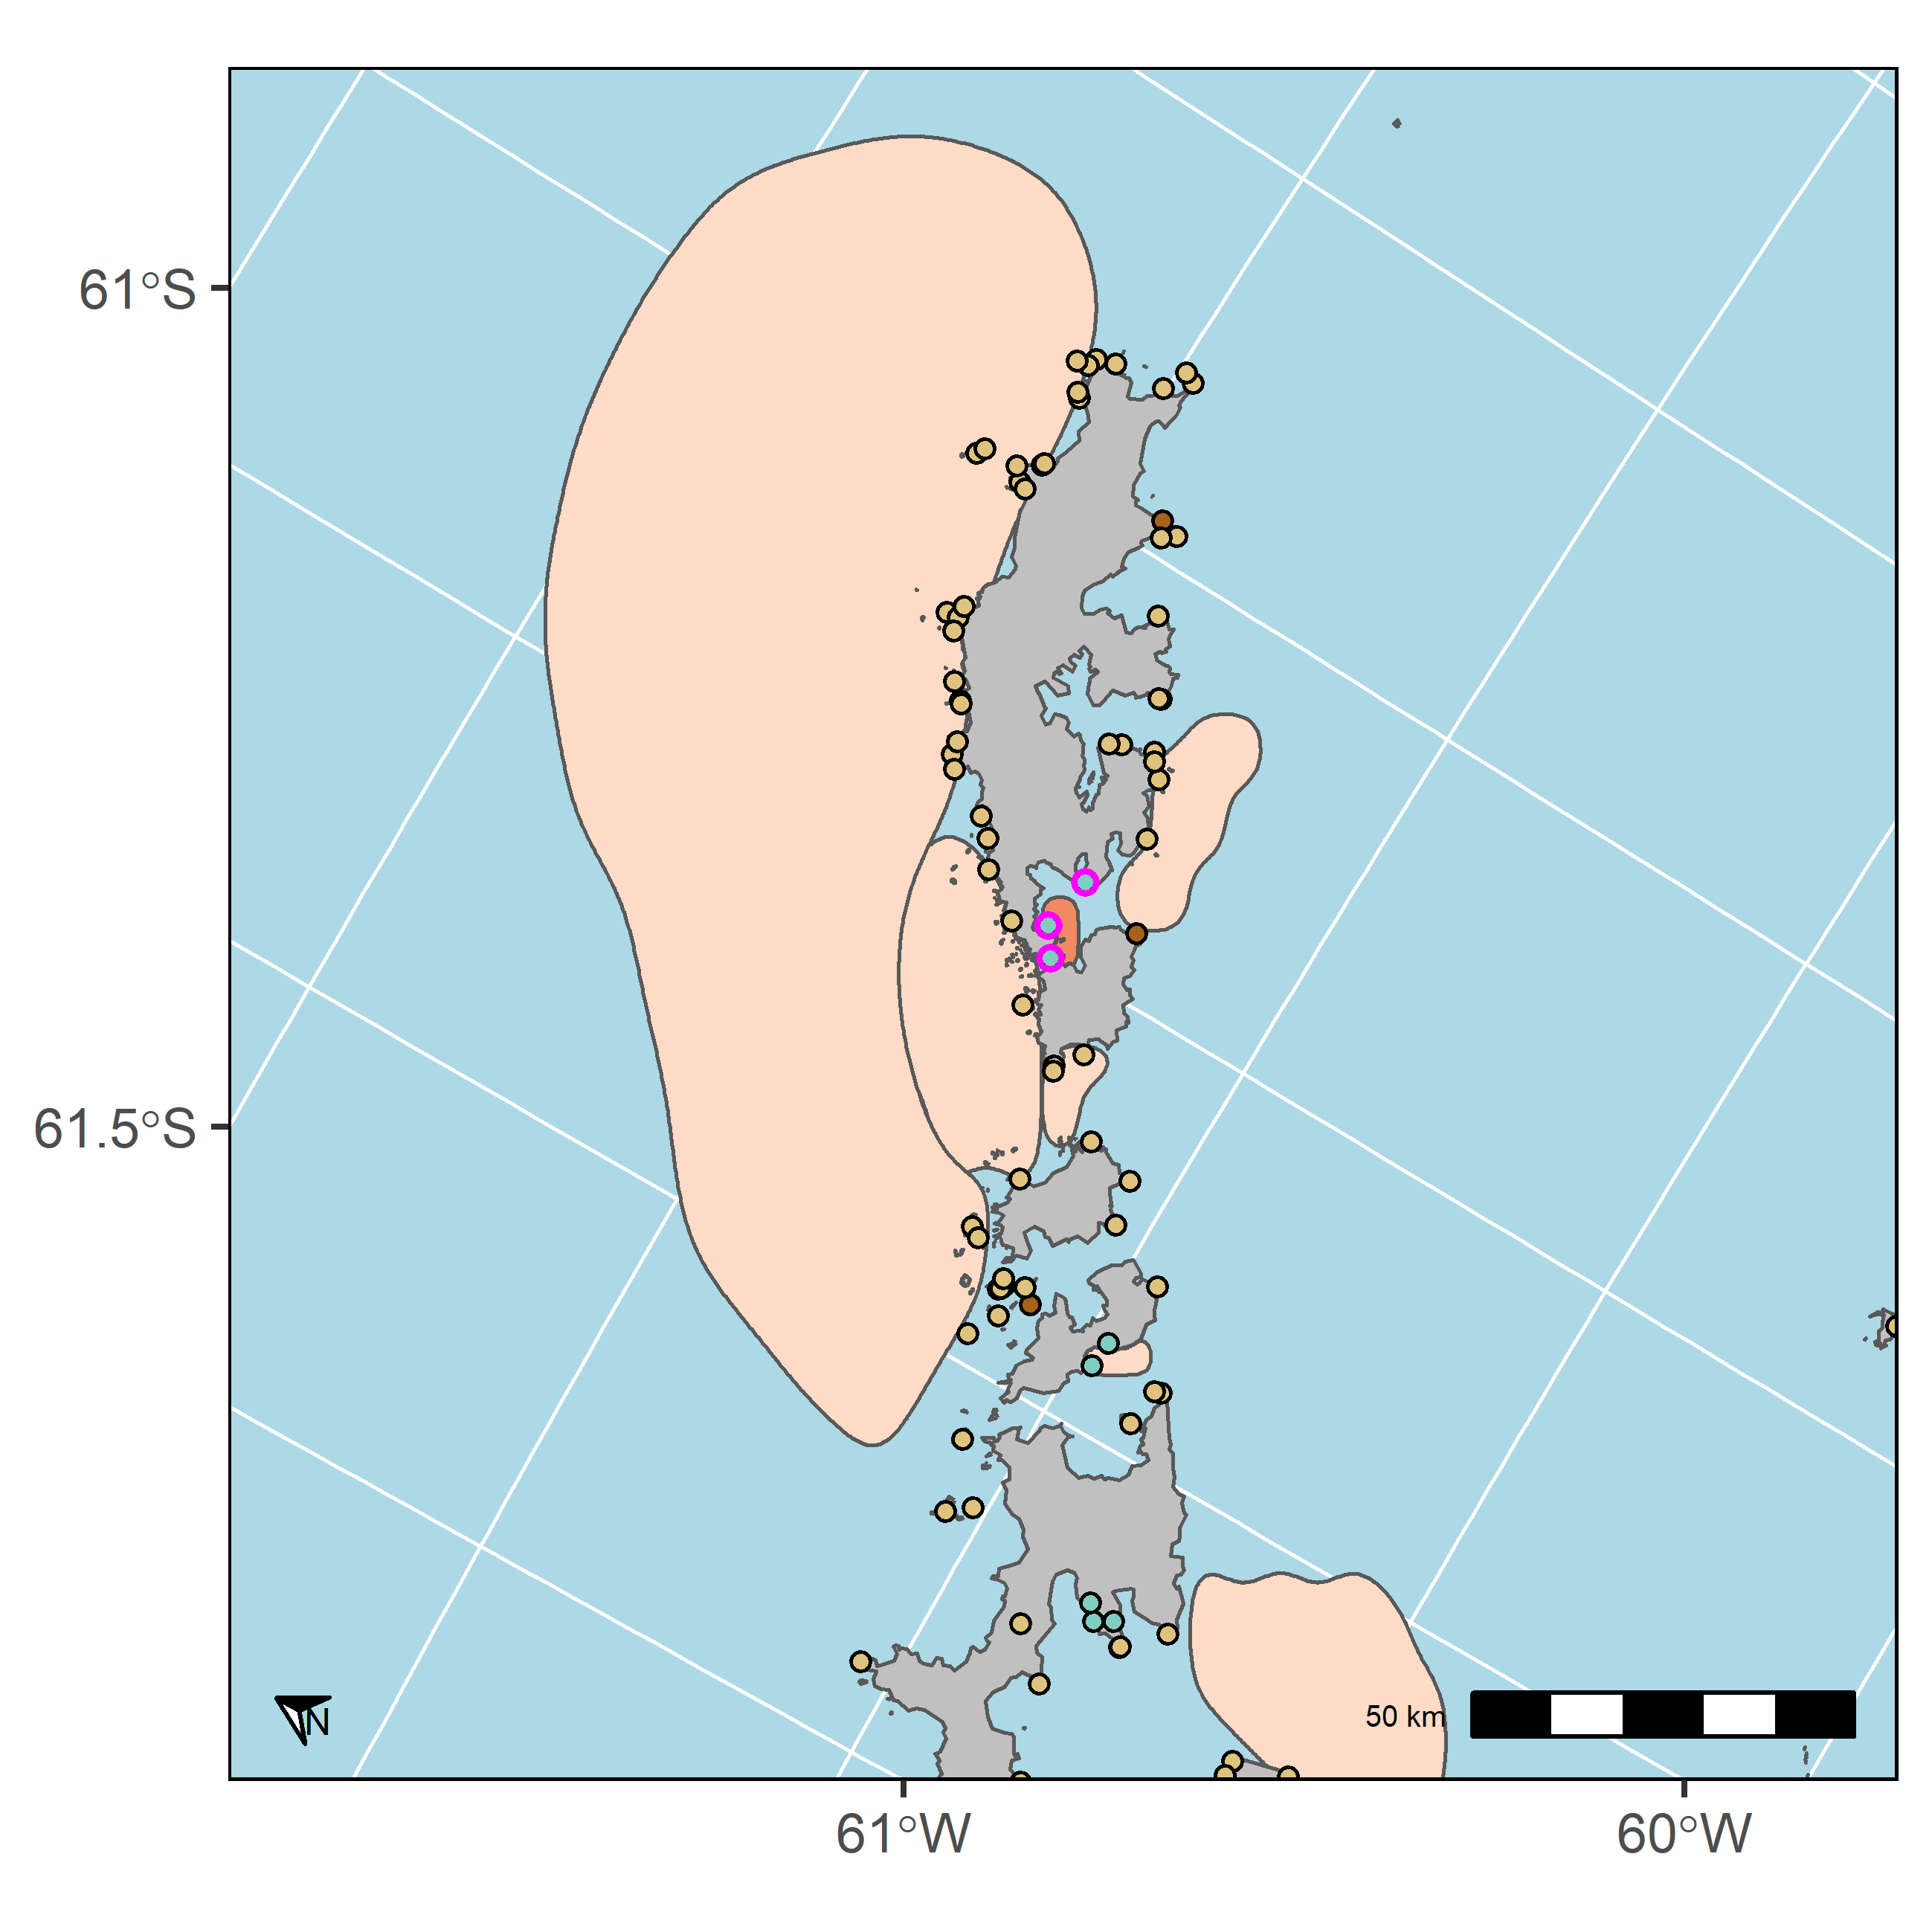


Figure A11.1: Focal Antarctica marine IBA 11 (orange polygon) for penguins, and other marine IBAs (light orange) for penguins identified during the project. Colonies circled in purple are those whose populations contributed to the marine IBA triggering IBA criteria A4 (>1% of the global population). See Table A11.2.

Table A11.1: Population estimates and count types (those that triggered IBA Criteria A4, >1% of global population) for key penguin species in Antarctic marine IBA 11. Key sources of colony input data associated with this marine IBA are detailed in Table A11.2. Population estimates refer to the lower and upper estimated number of adult breeding pairs likely to be using the marine IBA; derived from summing over all cells from individual colony density distribution surfaces which contributed to the identification of the marine IBA.

| Site code | Species | Count type | Lower | Upper |
| --- | --- | --- | --- | --- |
| 11 | GEP | max | 6796 | 14018 |
| 11 | GEP | median | 4527 | 12758 |
| 11 | GEP | recent | 6222 | 13629 |

Table A11.2: Population estimates (adult breeding pairs) and count types from individual colony(ies) density distribution surfaces which contributed to the identification of marine IBA: 11. I.e. The lower and upper estimated number of adult breeding pairs from a given colony that may utilise the marine IBA. Note, the lower population estimate represents the lowest estimated number of breeding pairs from a given colony contributing to the delineation of the marine IBA site. The lower population estimate may therefore be zero when only part of the individual colony(ies) density distribution surface contributed to the marine IBA. *The Count Year for the median population estimate indicates the number of yearly population assessments for the given colony. Colony names are given in the ‘Colony Codes’ table at the end of this document.

| Site code | Species | Colony | Count type | Lower | Upper | Count year* |
| --- | --- | --- | --- | --- | --- | --- |
| 11 | GEP | ARDL | max | 4018 | 5131 | 2002 |
| 11 | GEP | ARDL | median | 2758 | 3522 | 19 |
| 11 | GEP | ARDL | recent | 3629 | 4635 | 2005 |
| 11 | GEP | BART | max | 1665 | 1665 | 2012 |
| 11 | GEP | BART | median | 1005 | 1005 | 16 |
| 11 | GEP | BART | recent | 1587 | 1587 | 2013 |
| 11 | GEP | RIPP | max | 10000 | 10000 | 1966 |
| 11 | GEP | RIPP | median | 10000 | 10000 | 1 |
| 11 | GEP | RIPP | recent | 10000 | 10000 | 1966 |

# Antarctica marine IBA: 12

| Site code | 12 |
| --- | --- |
| Species | GEP |
| IBA criteria | A4: Congregations |
| Decimal Latitude | -62.288 |
| Decimal Longitude | -58.517 |
| Area (ha) | 29723.77 |
| Area (km2) | 297.2377 |
| MPA Overlap | D1MPA |
| MPA Type | Proposed |
| MPA Zones | KFZ-NWAP |


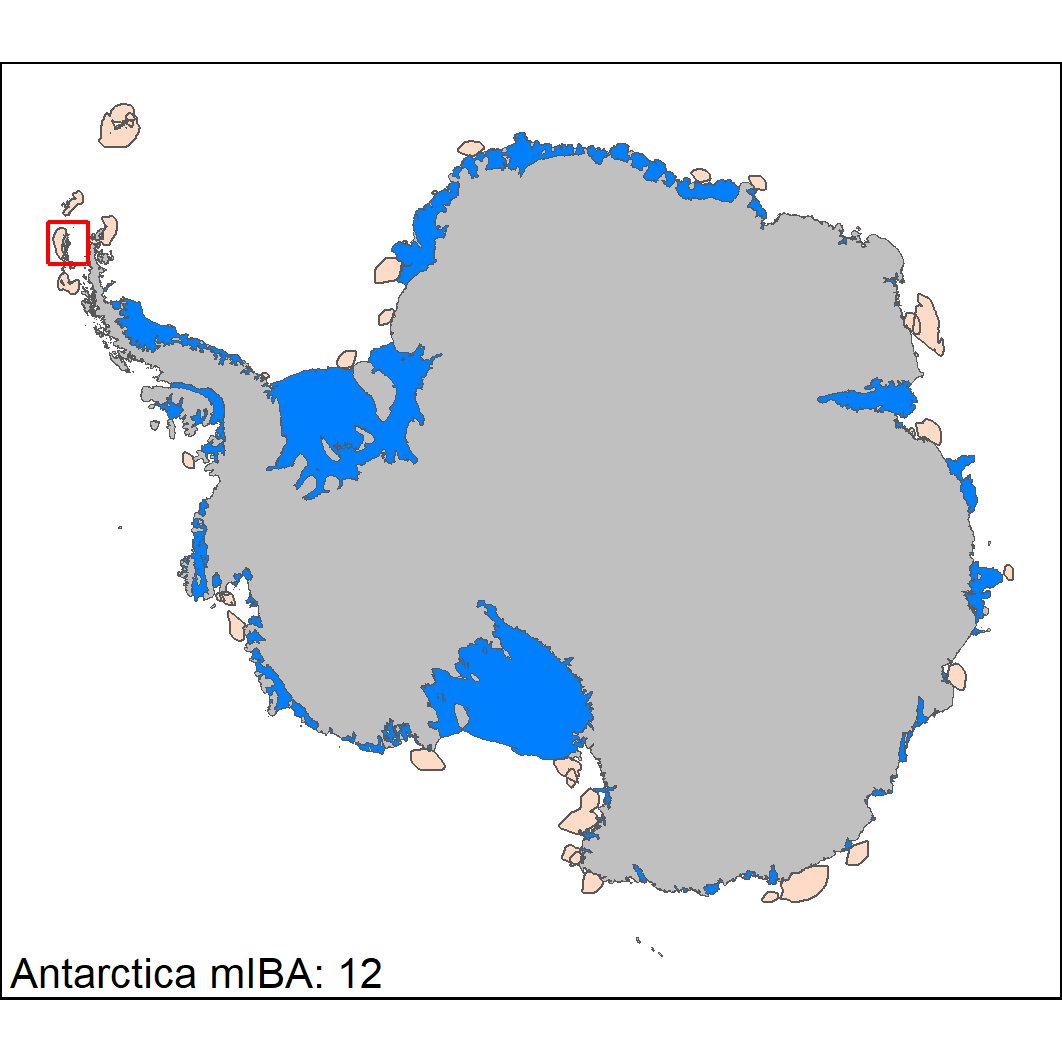


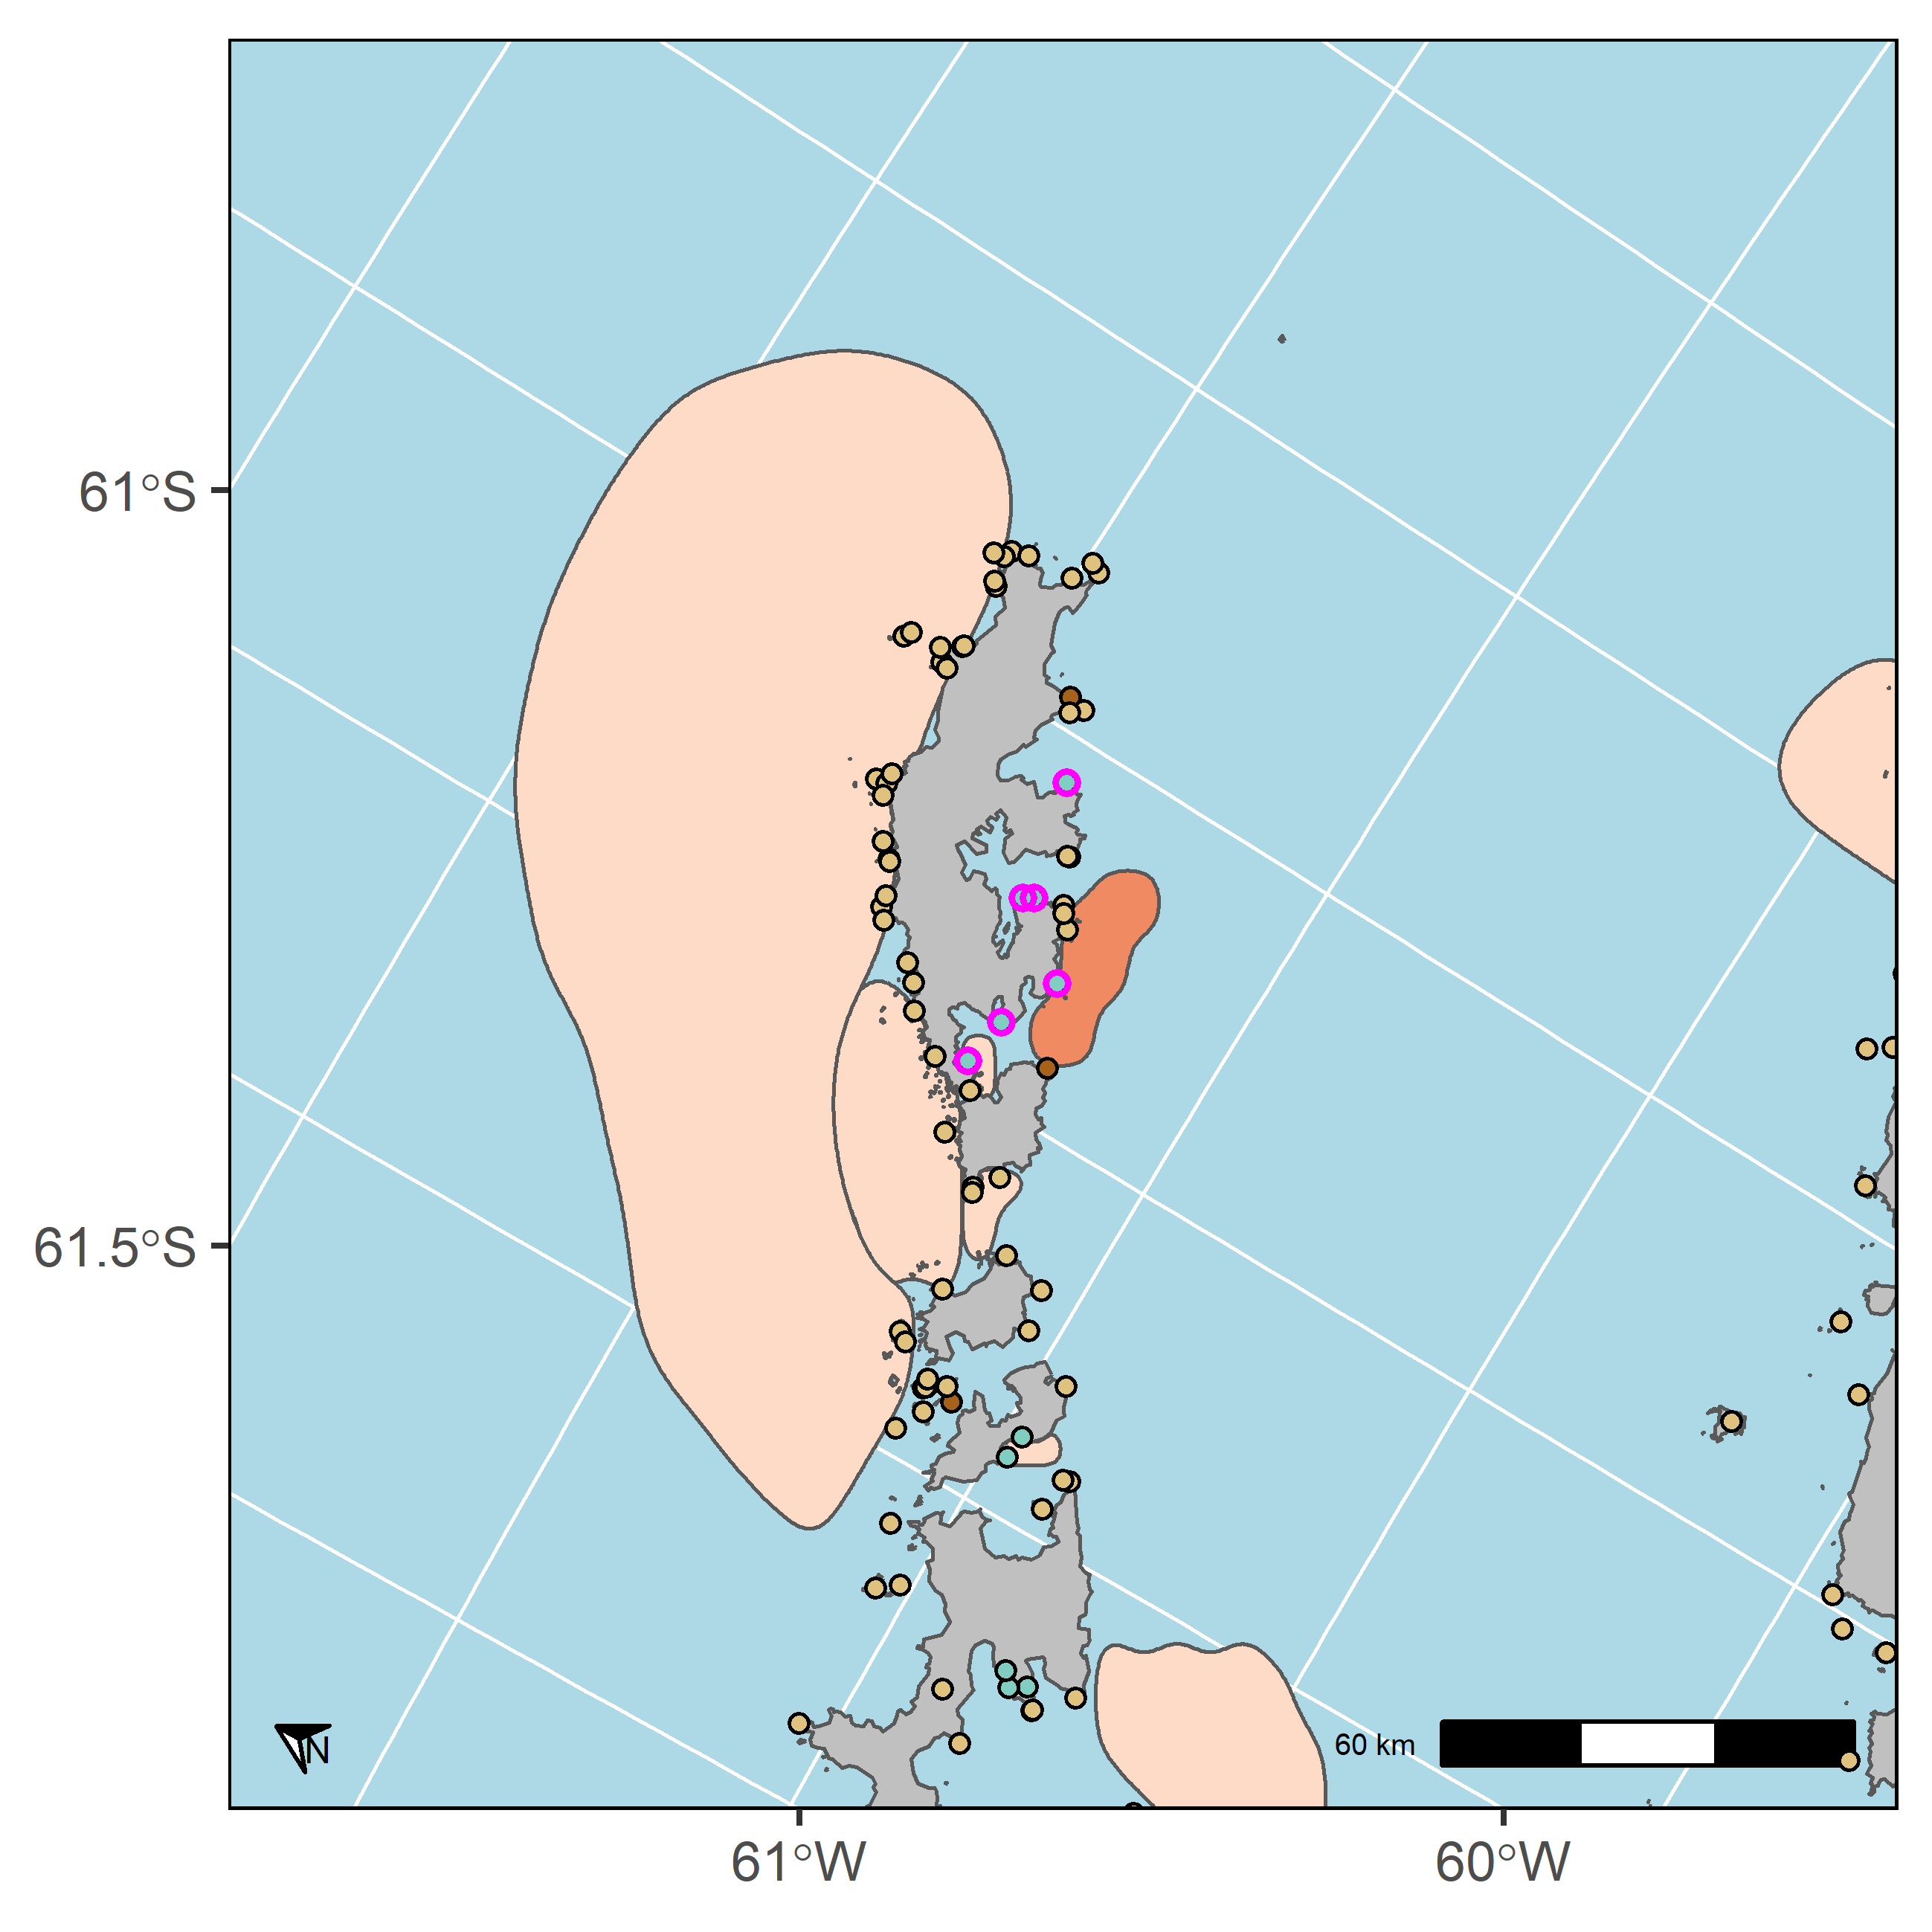


Figure A12.1: Focal Antarctica marine IBA 12 (orange polygon) for penguins, and other marine IBAs (light orange) for penguins identified during the project. Colonies circled in purple are those whose populations contributed to the marine IBA triggering IBA criteria A4 (>1% of the global population). See Table A12.2.

Table A12.1: Population estimates and count types (those that triggered IBA Criteria A4, >1% of global population) for key penguin species in Antarctic marine IBA 12. Key sources of colony input data associated with this marine IBA are detailed in Table A12.2. Population estimates refer to the lower and upper estimated number of adult breeding pairs likely to be using the marine IBA; derived from summing over all cells from individual colony density distribution surfaces which contributed to the identification of the marine IBA.

| Site code | Species | Count type | Lower | Upper |
| --- | --- | --- | --- | --- |
| 12 | GEP | max | 5349 | 9438 |
| 12 | GEP | median | 3931 | 5517 |
| 12 | GEP | recent | 4901 | 8639 |

Table A12.2: Population estimates (adult breeding pairs) and count types from individual colony(ies) density distribution surfaces which contributed to the identification of marine IBA: 12. I.e. The lower and upper estimated number of adult breeding pairs from a given colony that may utilise the marine IBA. Note, the lower population estimate represents the lowest estimated number of breeding pairs from a given colony contributing to the delineation of the marine IBA site. The lower population estimate may therefore be zero when only part of the individual colony(ies) density distribution surface contributed to the marine IBA. *The Count Year for the median population estimate indicates the number of yearly population assessments for the given colony. Colony names are given in the ‘Colony Codes’ table at the end of this document.

| Site code | Species | Colony | Count type | Lower | Upper | Count year* |
| --- | --- | --- | --- | --- | --- | --- |
| 12 | GEP | ARDL | max | 598 | 3207 | 2002 |
| 12 | GEP | ARDL | median | 411 | 2201 | 19 |
| 12 | GEP | ARDL | recent | 540 | 2897 | 2005 |
| 12 | GEP | BART | max | 575 | 1770 | 2012 |
| 12 | GEP | BART | median | 347 | 1069 | 16 |
| 12 | GEP | BART | recent | 548 | 1686 | 2013 |
| 12 | GEP | LION | max | 1215 | 1410 | 2010 |
| 12 | GEP | LION | median | 980 | 1138 | 8 |
| 12 | GEP | LION | recent | 1215 | 1410 | 2010 |
| 12 | GEP | LLAN | max | 2680 | 4167 | 2013 |
| 12 | GEP | LLAN | median | 1035 | 1609 | 28 |
| 12 | GEP | LLAN | recent | 2680 | 4167 | 2013 |
| 12 | GEP | PTHO | max | 273 | 504 | 1981 |
| 12 | GEP | PTHO | median | 82 | 152 | 11 |
| 12 | GEP | PTHO | recent | 18 | 33 | 2003 |
| 12 | GEP | STRA | max | 1069 | 2021 | 1980 |
| 12 | GEP | STRA | median | 1035 | 1956 | 5 |
| 12 | GEP | STRA | recent | 962 | 1819 | 1988 |

# Antarctica marine IBA: 13

| Site code | 13 |
| --- | --- |
| Species | ADP |
| IBA criteria | A4: Congregations |
| Decimal Latitude | -63.539 |
| Decimal Longitude | -55.086 |
| Area (ha) | 1304312 |
| Area (km2) | 13043.12 |
| MPA Overlap | D1MPA |
| MPA Type | Proposed |
| MPA Zones | GPZ-AP,WSMPA_P1 |


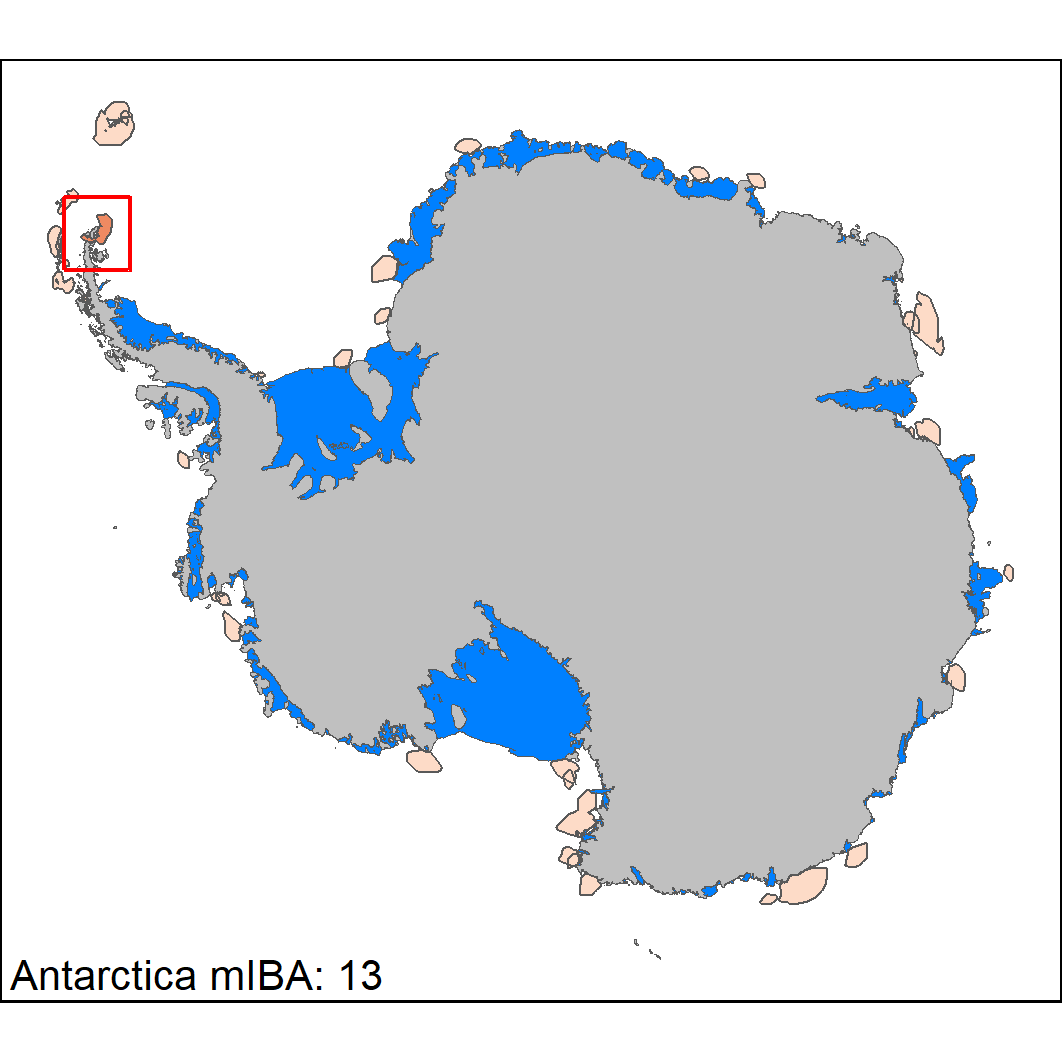


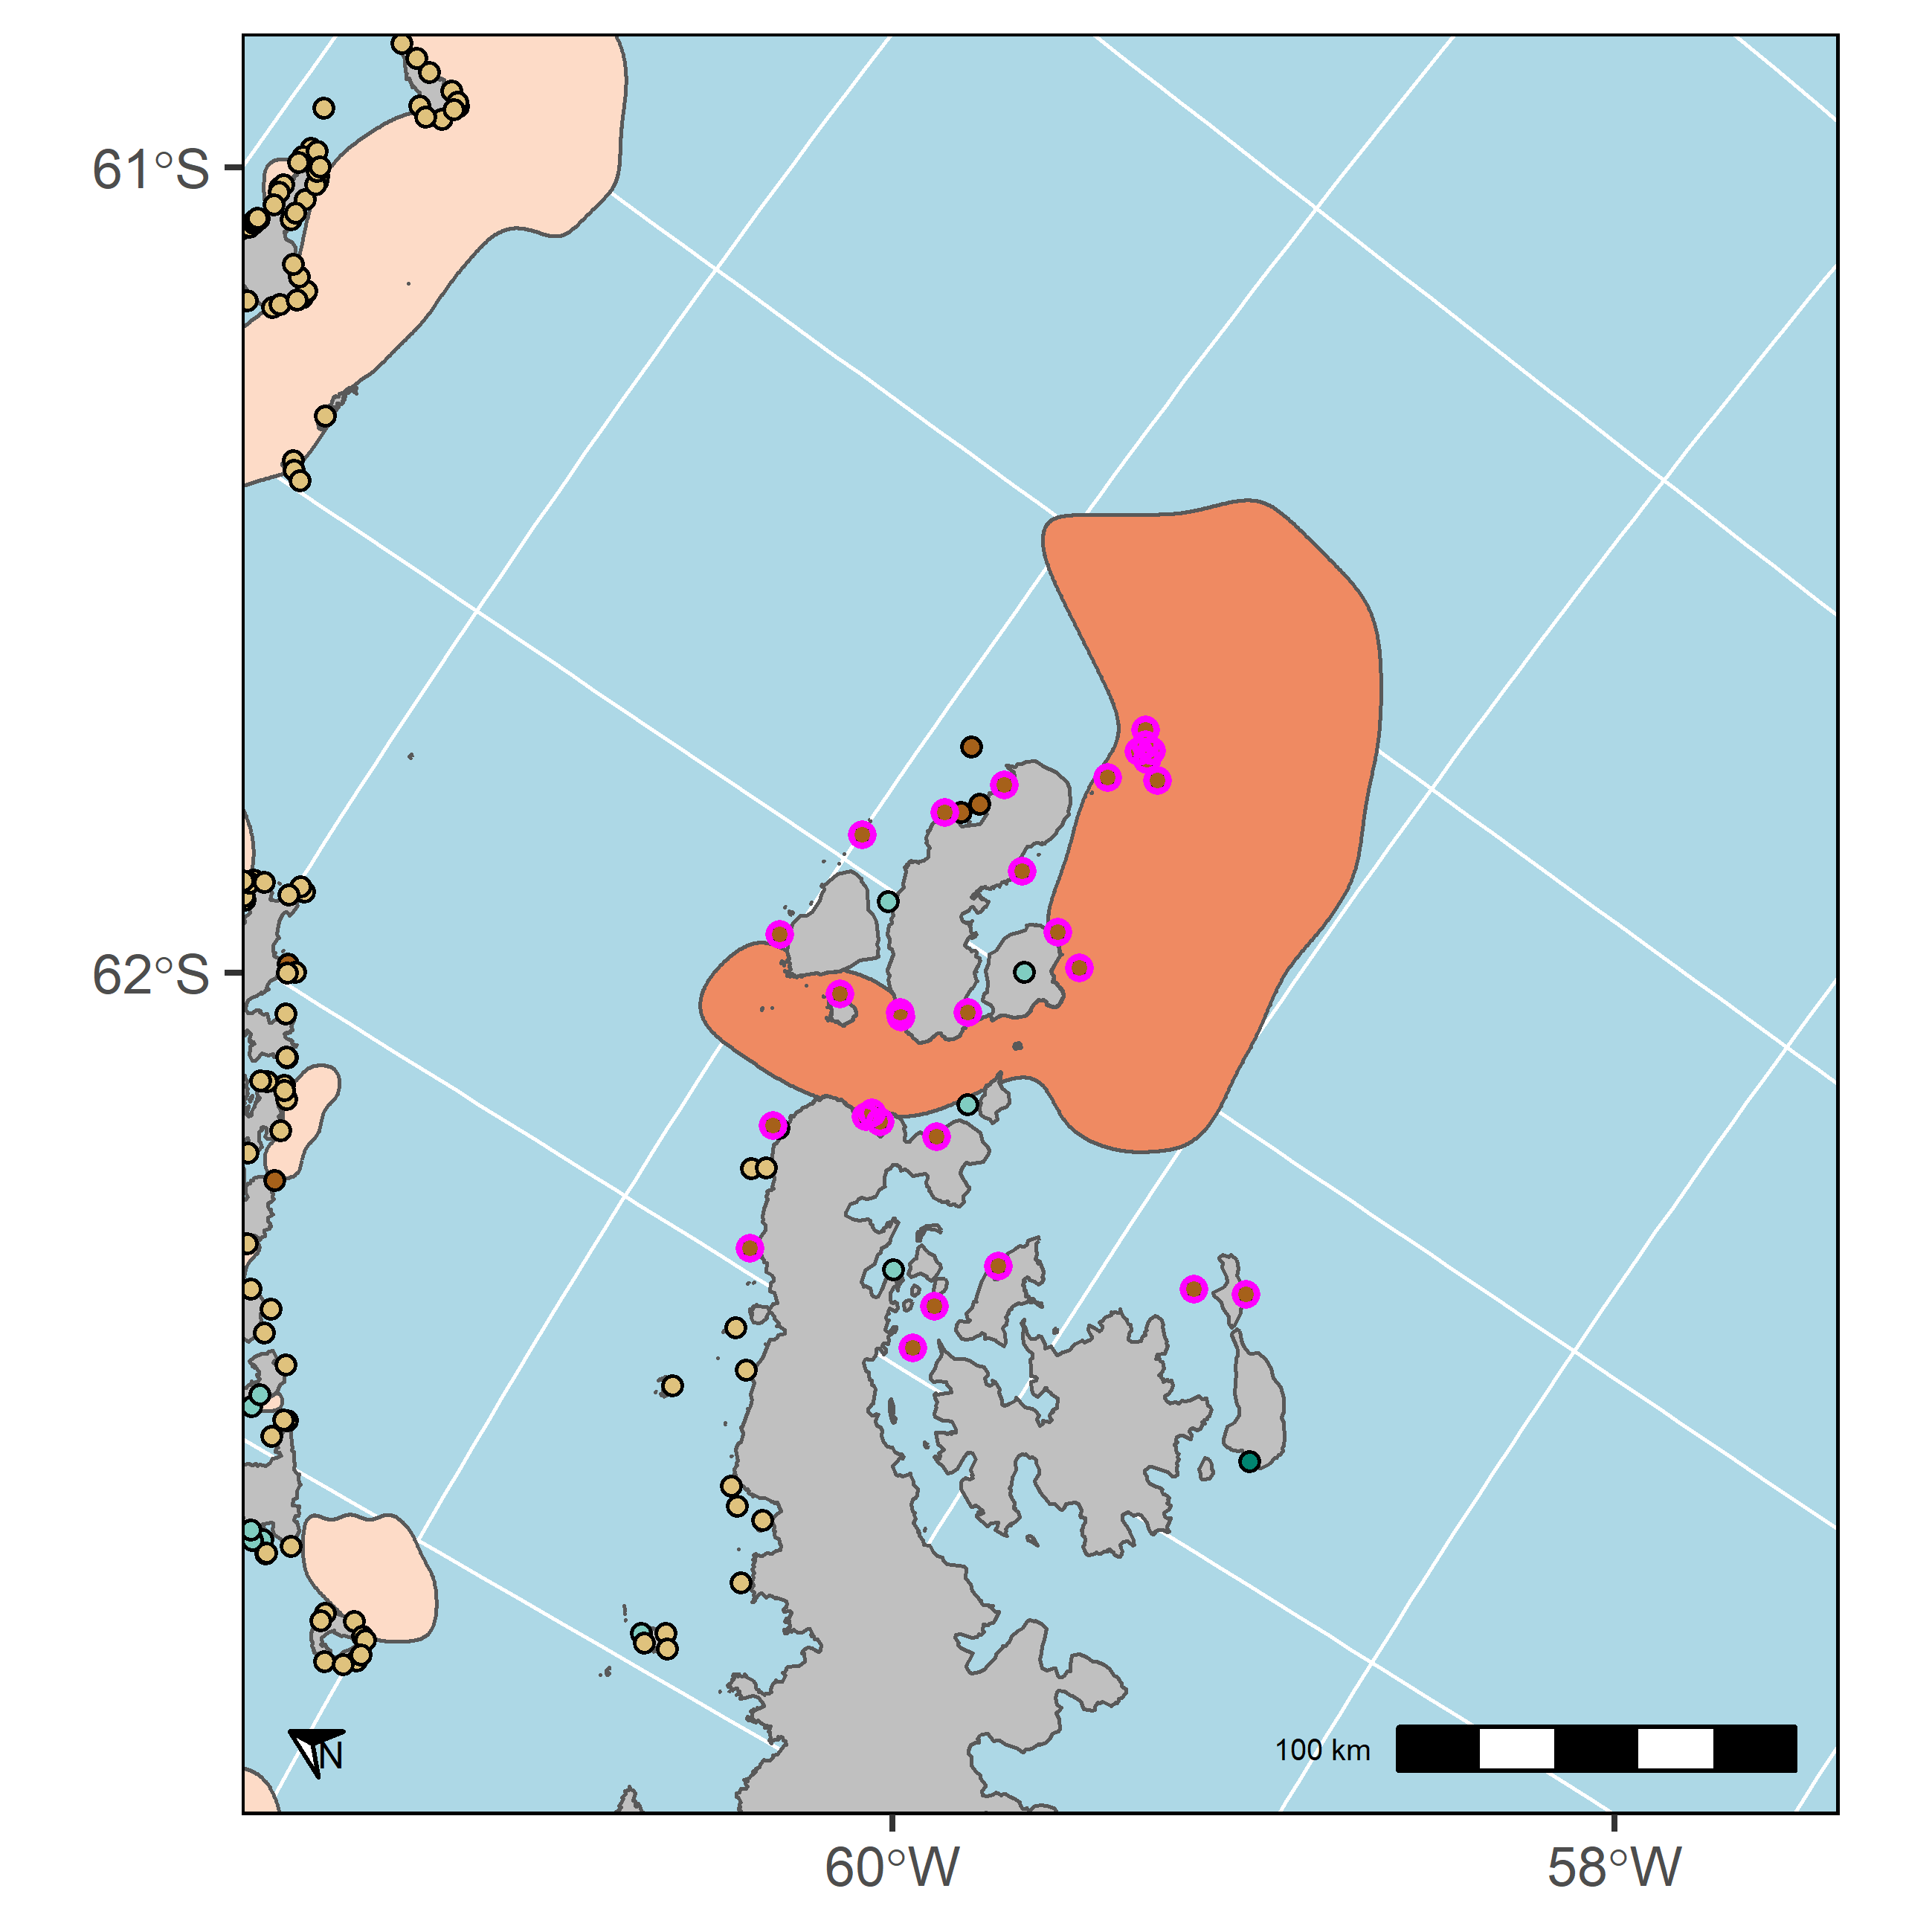


Figure A13.1: Focal Antarctica marine IBA 13 (orange polygon) for penguins, and other marine IBAs (light orange) for penguins identified during the project. Colonies circled in purple are those whose populations contributed to the marine IBA triggering IBA criteria A4 (>1% of the global population). See Table A13.2.

Table A13.1: Population estimates and count types (those that triggered IBA Criteria A4, >1% of global population) for key penguin species in Antarctic marine IBA 13. Key sources of colony input data associated with this marine IBA are detailed in Table A13.2. Population estimates refer to the lower and upper estimated number of adult breeding pairs likely to be using the marine IBA; derived from summing over all cells from individual colony density distribution surfaces which contributed to the identification of the marine IBA.

| Site code | Species | Count type | Lower | Upper |
| --- | --- | --- | --- | --- |
| 13 | ADP | max | 44183 | 589342 |
| 13 | ADP | median | 38384 | 481978 |
| 13 | ADP | recent | 38212 | 574001 |

Table A13.2: Population estimates (adult breeding pairs) and count types from individual colony(ies) density distribution surfaces which contributed to the identification of marine IBA: 13. I.e. The lower and upper estimated number of adult breeding pairs from a given colony that may utilise the marine IBA. Note, the lower population estimate represents the lowest estimated number of breeding pairs from a given colony contributing to the delineation of the marine IBA site. The lower population estimate may therefore be zero when only part of the individual colony(ies) density distribution surface contributed to the marine IBA. *The Count Year for the median population estimate indicates the number of yearly population assessments for the given colony. Colony names are given in the ‘Colony Codes’ table at the end of this document.

| Site code | Species | Colony | Count type | Lower | Upper | Count year* |
| --- | --- | --- | --- | --- | --- | --- |
| 13 | ADP | BEAG | max | 17298 | 284535 | 2015 |
| 13 | ADP | BEAG | median | 11594 | 190714 | 2 |
| 13 | ADP | BEAG | recent | 17298 | 284535 | 2015 |
| 13 | ADP | BRAS | max | 0 | 166078 | 2000 |
| 13 | ADP | BRAS | median | 0 | 130514 | 2 |
| 13 | ADP | BRAS | recent | 0 | 94951 | 2015 |
| 13 | ADP | BROW | max | 1649 | 19998 | 2006 |
| 13 | ADP | BROW | median | 1439 | 17450 | 2 |
| 13 | ADP | BROW | recent | 1229 | 14902 | 2013 |
| 13 | ADP | COCK | max | 0 | 5466 | 2011 |
| 13 | ADP | COCK | median | 0 | 5466 | 1 |
| 13 | ADP | COCK | recent | 0 | 5466 | 2011 |
| 13 | ADP | DARW | max | 284 | 7419 | 2000 |
| 13 | ADP | DARW | median | 253 | 6612 | 2 |
| 13 | ADP | DARW | recent | 222 | 5804 | 2015 |
| 13 | ADP | DEVI | max | 0 | 5227 | 2008 |
| 13 | ADP | DEVI | median | 0 | 4180 | 2 |
| 13 | ADP | DEVI | recent | 0 | 5227 | 2008 |
| 13 | ADP | DURO | max | 29 | 100 | 1990 |
| 13 | ADP | DURO | median | 29 | 100 | 1 |
| 13 | ADP | DURO | recent | 29 | 100 | 1990 |
| 13 | ADP | DURV | max | 3 | 20978 | 2012 |
| 13 | ADP | DURV | median | 2 | 13243 | 3 |
| 13 | ADP | DURV | recent | 2 | 13243 | 2017 |
| 13 | ADP | EARL | max | 2 | 23649 | 2001 |
| 13 | ADP | EARL | median | 2 | 22360 | 2 |
| 13 | ADP | EARL | recent | 2 | 21071 | 2015 |
| 13 | ADP | EDEN | max | 2 | 46855 | 1996 |
| 13 | ADP | EDEN | median | 2 | 46114 | 2 |
| 13 | ADP | EDEN | recent | 2 | 45374 | 2011 |
| 13 | ADP | FLIE | max | 0 | 8 | 2011 |
| 13 | ADP | FLIE | median | 0 | 8 | 1 |
| 13 | ADP | FLIE | recent | 0 | 8 | 2011 |
| 13 | ADP | GOUR | max | 4477 | 14404 | 2015 |
| 13 | ADP | GOUR | median | 3747 | 12055 | 2 |
| 13 | ADP | GOUR | recent | 4477 | 14404 | 2015 |
| 13 | ADP | HERO | max | 25628 | 292363 | 2015 |
| 13 | ADP | HERO | median | 24952 | 284650 | 2 |
| 13 | ADP | HERO | recent | 25628 | 292363 | 2015 |
| 13 | ADP | HOPE | max | 14 | 123850 | 1985 |
| 13 | ADP | HOPE | median | 12 | 110638 | 4 |
| 13 | ADP | HOPE | recent | 12 | 104139 | 2012 |
| 13 | ADP | KNOB | max | 34 | 87 | 1960 |
| 13 | ADP | KNOB | median | 34 | 87 | 1 |
| 13 | ADP | KNOB | recent | 34 | 87 | 1960 |
| 13 | ADP | MADD | max | 4669 | 34022 | 2012 |
| 13 | ADP | MADD | median | 4669 | 34022 | 1 |
| 13 | ADP | MADD | recent | 4669 | 34022 | 2012 |
| 13 | ADP | MADI | max | 169 | 1261 | 2009 |
| 13 | ADP | MADI | median | 152 | 1130 | 2 |
| 13 | ADP | MADI | recent | 134 | 1000 | 2018 |
| 13 | ADP | NCAP | max | 32 | 75 | 1960 |
| 13 | ADP | NCAP | median | 32 | 75 | 1 |
| 13 | ADP | NCAP | recent | 32 | 75 | 1960 |
| 13 | ADP | PATE | max | 38 | 162 | 1960 |
| 13 | ADP | PATE | median | 38 | 162 | 1 |
| 13 | ADP | PATE | recent | 38 | 162 | 1960 |
| 13 | ADP | PAUL | max | 2 | 117834 | 2000 |
| 13 | ADP | PAUL | median | 2 | 103642 | 4 |
| 13 | ADP | PAUL | recent | 2 | 107285 | 2011 |
| 13 | ADP | PEIN | max | 1060 | 12000 | 2015 |
| 13 | ADP | PEIN | median | 676 | 7656 | 2 |
| 13 | ADP | PEIN | recent | 1060 | 12000 | 2015 |
| 13 | ADP | PEPO | max | 0 | 9968 | 2006 |
| 13 | ADP | PEPO | median | 0 | 8289 | 3 |
| 13 | ADP | PEPO | recent | 0 | 6047 | 2009 |
| 13 | ADP | PLAT | max | 1584 | 40803 | 2015 |
| 13 | ADP | PLAT | median | 1333 | 34352 | 2 |
| 13 | ADP | PLAT | recent | 1584 | 40803 | 2015 |
| 13 | ADP | REDI | max | 0 | 62 | 2006 |
| 13 | ADP | REDI | median | 0 | 62 | 1 |
| 13 | ADP | REDI | recent | 0 | 62 | 2006 |
| 13 | ADP | SHEN | max | 335 | 1523 | 2005 |
| 13 | ADP | SHEN | median | 335 | 1523 | 1 |
| 13 | ADP | SHEN | recent | 335 | 1523 | 2005 |
| 13 | ADP | SHEP | max | 555 | 3182 | 2005 |
| 13 | ADP | SHEP | median | 555 | 3182 | 1 |
| 13 | ADP | SHEP | recent | 555 | 3182 | 2005 |
| 13 | ADP | TAYH | max | 0 | 12756 | 2002 |
| 13 | ADP | TAYH | median | 0 | 4701 | 3 |
| 13 | ADP | TAYH | recent | 0 | 3029 | 2010 |
| 13 | ADP | VORT | max | 0 | 663 | 2008 |
| 13 | ADP | VORT | median | 0 | 536 | 2 |
| 13 | ADP | VORT | recent | 0 | 409 | 2011 |
| 13 | ADP | WIDE | max | 14 | 35 | 1960 |
| 13 | ADP | WIDE | median | 14 | 35 | 1 |
| 13 | ADP | WIDE | recent | 14 | 35 | 1960 |

# Antarctica marine IBA: 14

| Site code | 14 |
| --- | --- |
| Species | CHP |
| IBA criteria | A4: Congregations |
| Decimal Latitude | -61.379 |
| Decimal Longitude | -54.547 |
| Area (ha) | 657531.1 |
| Area (km2) | 6575.311 |
| MPA Overlap | D1MPA |
| MPA Type | Proposed |
| MPA Zones | KFZ-NWAP |


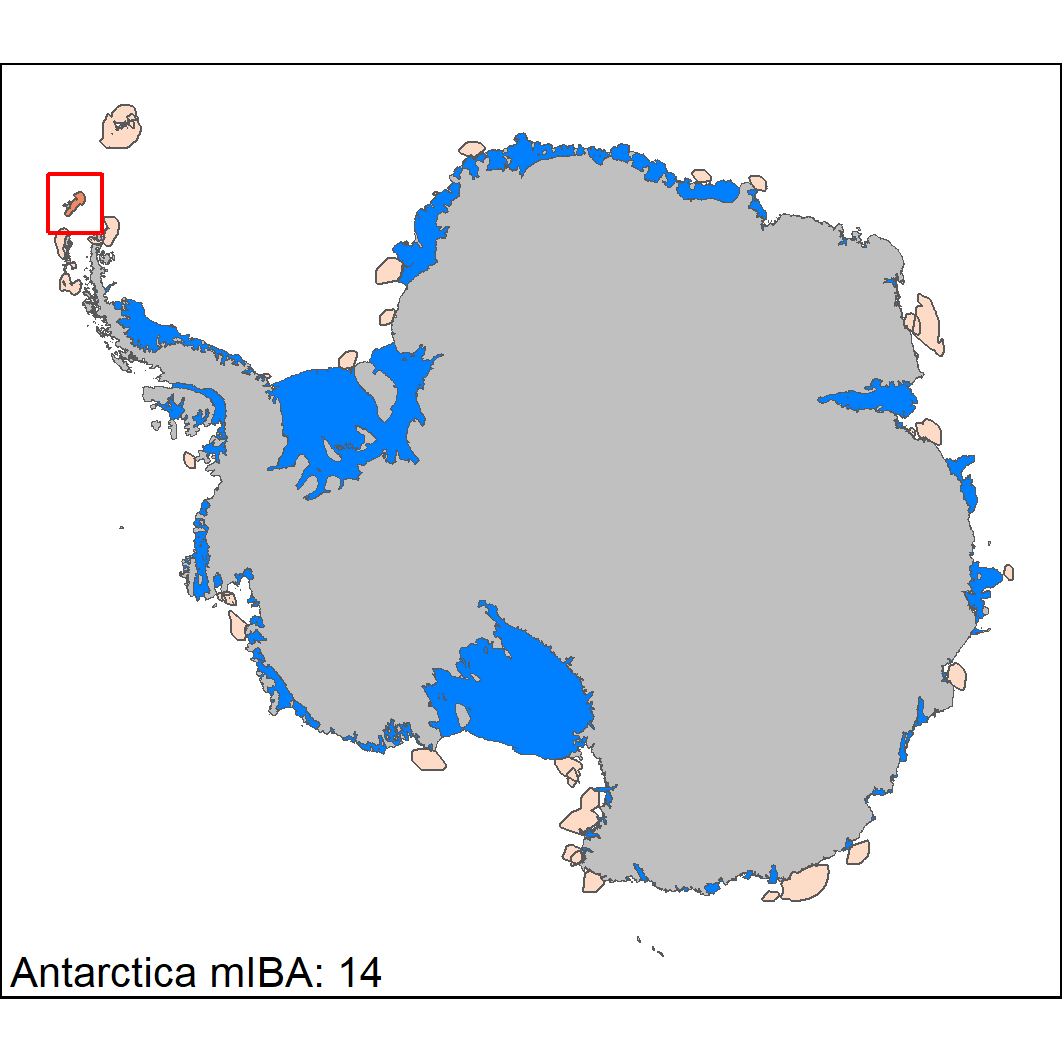


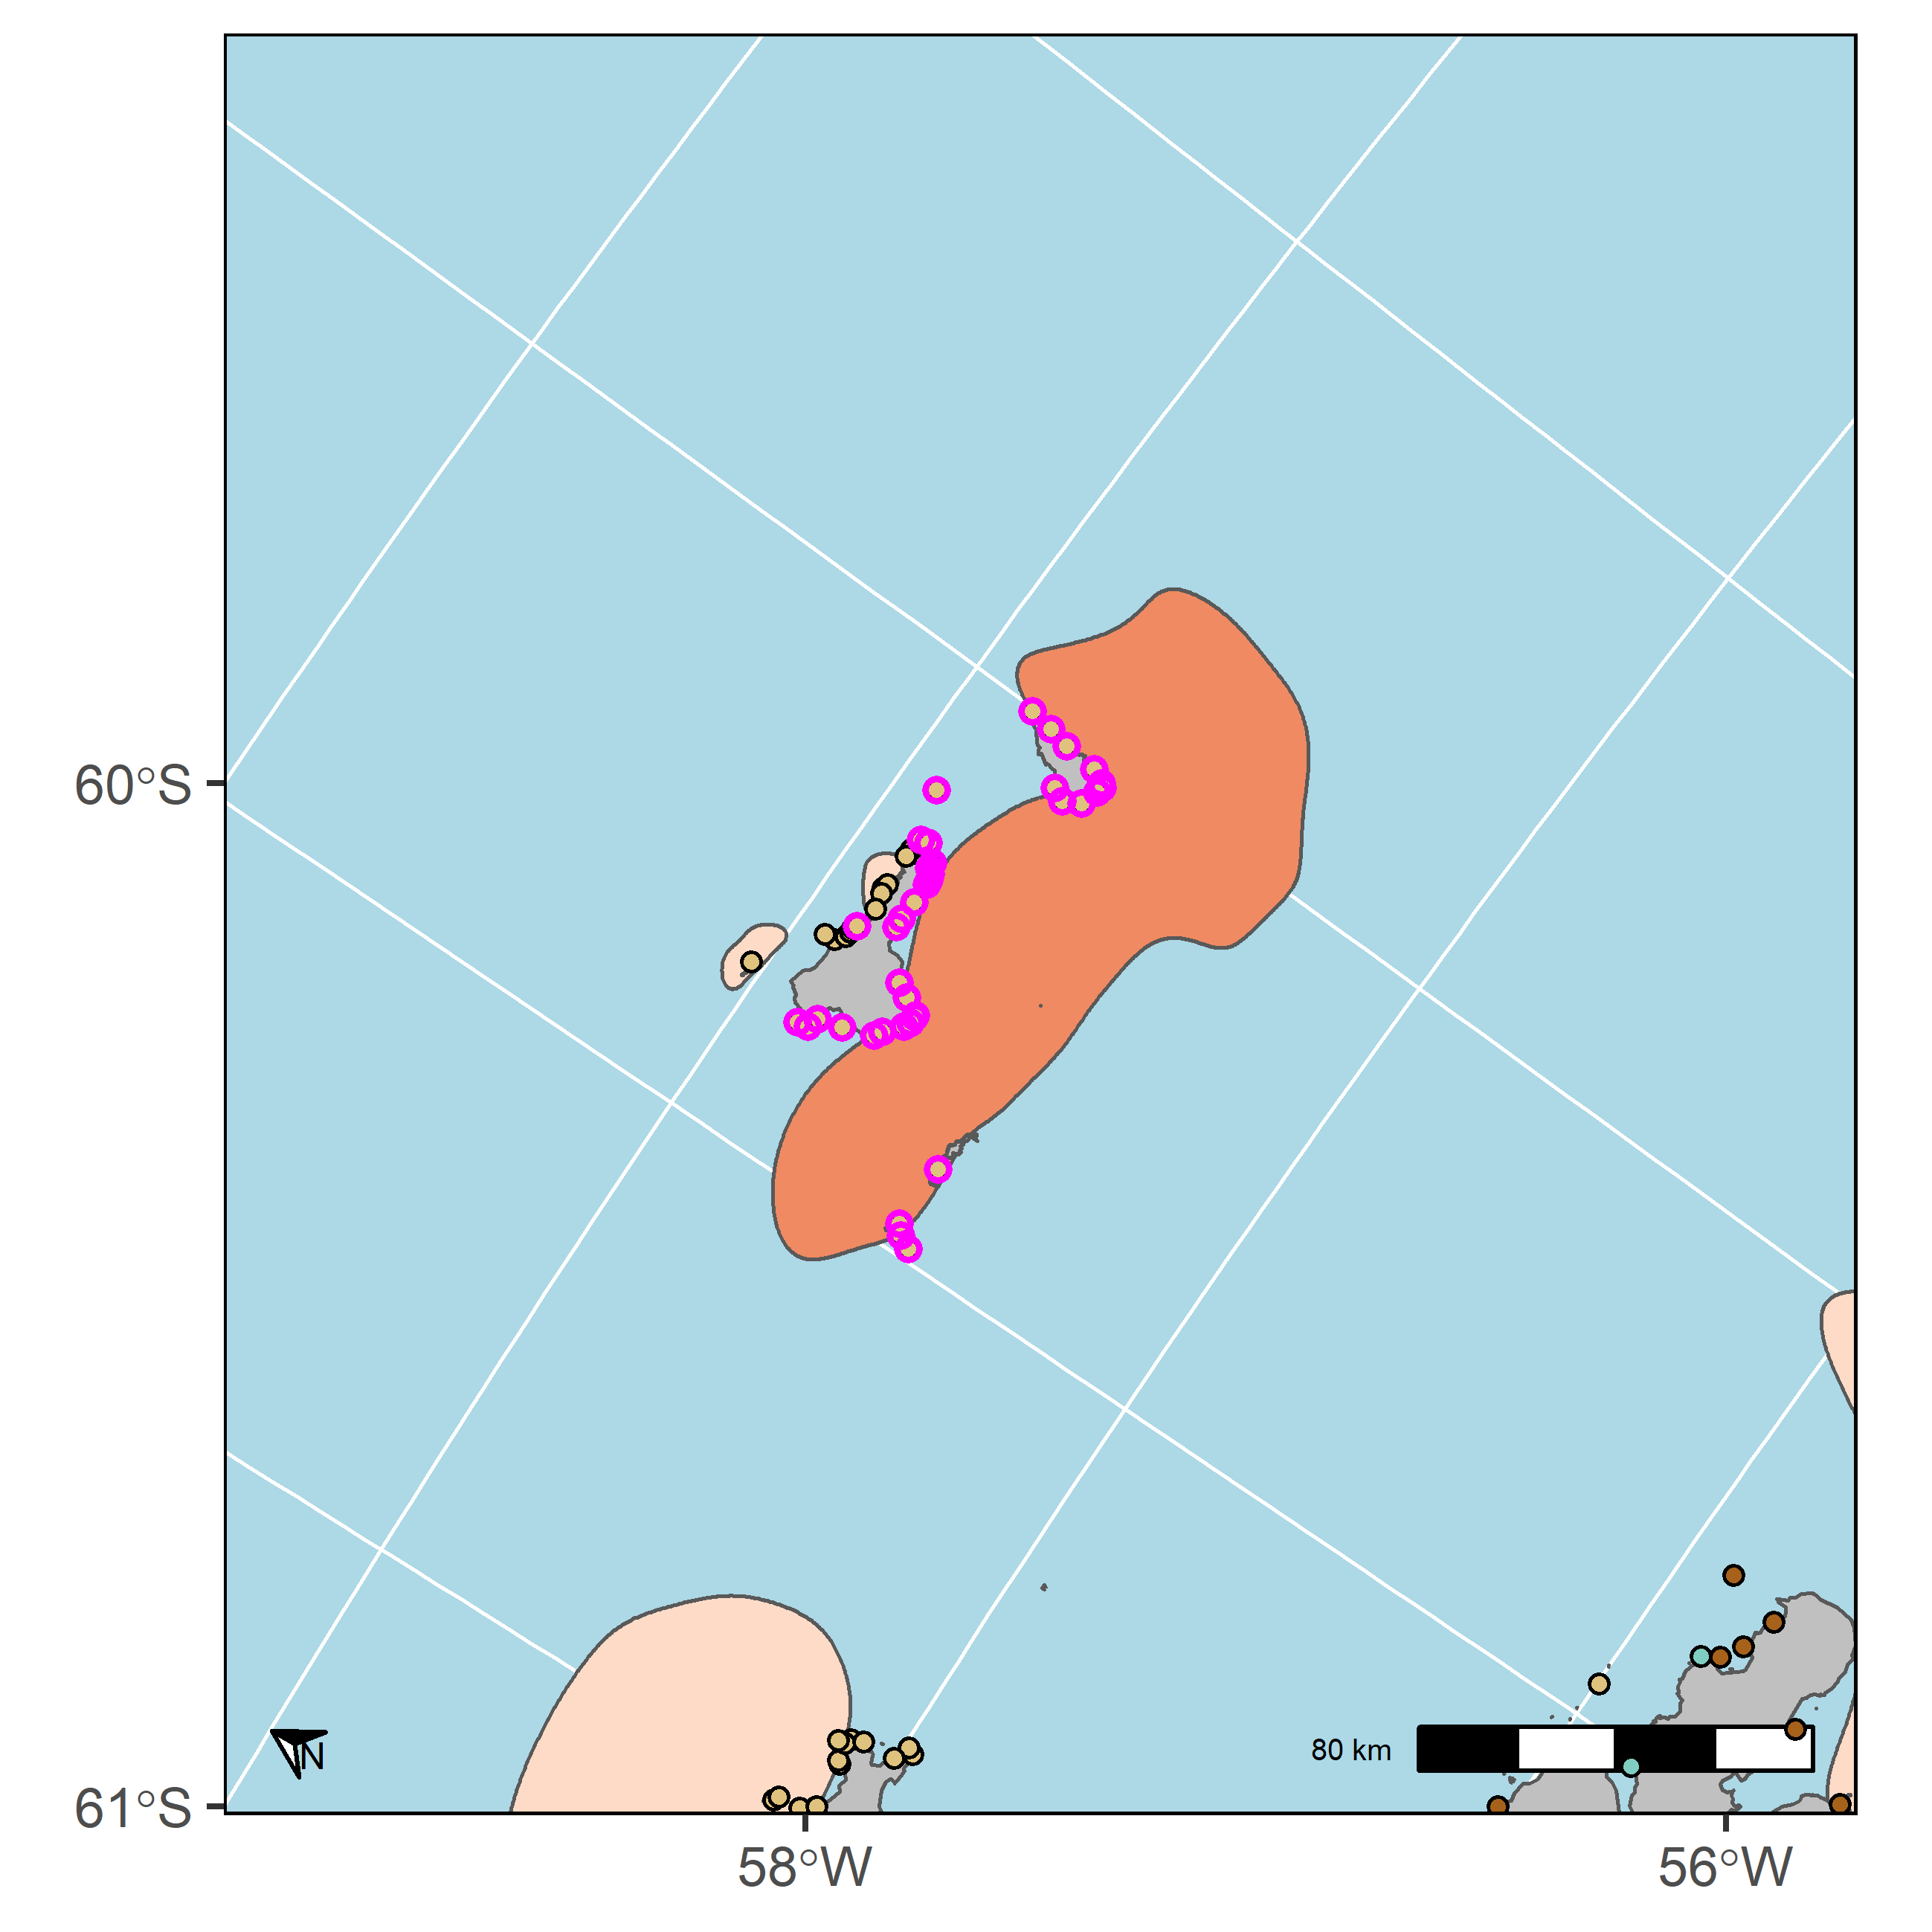


Figure A14.1: Focal Antarctica marine IBA 14 (orange polygon) for penguins, and other marine IBAs (light orange) for penguins identified during the project. Colonies circled in purple are those whose populations contributed to the marine IBA triggering IBA criteria A4 (>1% of the global population). See Table A14.2.

Table A14.1: Population estimates and count types (those that triggered IBA Criteria A4, >1% of global population) for key penguin species in Antarctic marine IBA 14. Key sources of colony input data associated with this marine IBA are detailed in Table A14.2. Population estimates refer to the lower and upper estimated number of adult breeding pairs likely to be using the marine IBA; derived from summing over all cells from individual colony density distribution surfaces which contributed to the identification of the marine IBA.

| Site code | Species | Count type | Lower | Upper |
| --- | --- | --- | --- | --- |
| 14 | CHP | max | 34285 | 147889 |
| 14 | CHP | median | 34280 | 147788 |
| 14 | CHP | recent | 34228 | 147788 |

Table A14.2: Population estimates (adult breeding pairs) and count types from individual colony(ies) density distribution surfaces which contributed to the identification of marine IBA: 14. I.e. The lower and upper estimated number of adult breeding pairs from a given colony that may utilise the marine IBA. Note, the lower population estimate represents the lowest estimated number of breeding pairs from a given colony contributing to the delineation of the marine IBA site. The lower population estimate may therefore be zero when only part of the individual colony(ies) density distribution surface contributed to the marine IBA. *The Count Year for the median population estimate indicates the number of yearly population assessments for the given colony. Colony names are given in the ‘Colony Codes’ table at the end of this document.

| Site code | Species | Colony | Count type | Lower | Upper | Count year* |
| --- | --- | --- | --- | --- | --- | --- |
| 14 | CHP | ASPL | max | 1 | 8650 | 1976 |
| 14 | CHP | ASPL | median | 1 | 8650 | 1 |
| 14 | CHP | ASPL | recent | 1 | 8650 | 1976 |
| 14 | CHP | BOWL | max | 3293 | 33000 | 1976 |
| 14 | CHP | BOWL | median | 3293 | 33000 | 1 |
| 14 | CHP | BOWL | recent | 3293 | 33000 | 1976 |
| 14 | CHP | BRIT | max | 63 | 5400 | 1970 |
| 14 | CHP | BRIT | median | 49 | 4134 | 2 |
| 14 | CHP | BRIT | recent | 34 | 2869 | 2016 |
| 14 | CHP | CCMP | max | 2 | 20526 | 1971 |
| 14 | CHP | CCMP | median | 2 | 20526 | 1 |
| 14 | CHP | CCMP | recent | 2 | 20526 | 1971 |
| 14 | CHP | CHIN | max | 1 | 17816 | 1977 |
| 14 | CHP | CHIN | median | 1 | 17816 | 1 |
| 14 | CHP | CHIN | recent | 1 | 17816 | 1977 |
| 14 | CHP | CLIN | max | 113 | 488 | 1971 |
| 14 | CHP | CLIN | median | 113 | 488 | 1 |
| 14 | CHP | CLIN | recent | 113 | 488 | 1971 |
| 14 | CHP | CRAB | max | 0 | 3556 | 1971 |
| 14 | CHP | CRAB | median | 0 | 3556 | 1 |
| 14 | CHP | CRAB | recent | 0 | 3556 | 1971 |
| 14 | CHP | CRAG | max | 36 | 1068 | 1977 |
| 14 | CHP | CRAG | median | 36 | 1068 | 1 |
| 14 | CHP | CRAG | recent | 36 | 1068 | 1977 |
| 14 | CHP | CRBA | max | 152 | 634 | 1971 |
| 14 | CHP | CRBA | median | 152 | 634 | 1 |
| 14 | CHP | CRBA | recent | 152 | 634 | 1971 |
| 14 | CHP | CRWL | max | 0 | 1509 | 1977 |
| 14 | CHP | CRWL | median | 0 | 1509 | 1 |
| 14 | CHP | CRWL | recent | 0 | 1509 | 1977 |
| 14 | CHP | EADI | max | 0 | 5150 | 1978 |
| 14 | CHP | EADI | median | 0 | 5150 | 1 |
| 14 | CHP | EADI | recent | 0 | 5150 | 1978 |
| 14 | CHP | EIN6 | max | 0 | 35 | 2020 |
| 14 | CHP | EIN6 | median | 0 | 35 | 1 |
| 14 | CHP | EIN6 | recent | 0 | 35 | 2020 |
| 14 | CHP | FARI | max | 938 | 3903 | 1976 |
| 14 | CHP | FARI | median | 938 | 3903 | 1 |
| 14 | CHP | FARI | recent | 938 | 3903 | 1976 |
| 14 | CHP | FURS | max | 9213 | 70450 | 1977 |
| 14 | CHP | FURS | median | 9213 | 70450 | 1 |
| 14 | CHP | FURS | recent | 9213 | 70450 | 1977 |
| 14 | CHP | GIBB | max | 3111 | 80000 | 2004 |
| 14 | CHP | GIBB | median | 3111 | 80000 | 1 |
| 14 | CHP | GIBB | recent | 3111 | 80000 | 2004 |
| 14 | CHP | GOLF | max | 57 | 252 | 1971 |
| 14 | CHP | GOLF | median | 57 | 252 | 1 |
| 14 | CHP | GOLF | recent | 57 | 252 | 1971 |
| 14 | CHP | GREE | max | 1711 | 11555 | 1970 |
| 14 | CHP | GREE | median | 1711 | 11555 | 1 |
| 14 | CHP | GREE | recent | 1711 | 11555 | 1970 |
| 14 | CHP | GRIB | max | 0 | 216 | 1971 |
| 14 | CHP | GRIB | median | 0 | 216 | 1 |
| 14 | CHP | GRIB | recent | 0 | 216 | 1971 |
| 14 | CHP | HUTB | max | 0 | 6082 | 1970 |
| 14 | CHP | HUTB | median | 0 | 6082 | 1 |
| 14 | CHP | HUTB | recent | 0 | 6082 | 1970 |
| 14 | CHP | JACO | max | 1 | 5184 | 1971 |
| 14 | CHP | JACO | median | 1 | 5184 | 1 |
| 14 | CHP | JACO | recent | 1 | 5184 | 1971 |
| 14 | CHP | LLOY | max | 32 | 88 | 1977 |
| 14 | CHP | LLOY | median | 32 | 88 | 1 |
| 14 | CHP | LLOY | recent | 32 | 88 | 1977 |
| 14 | CHP | LOOK | max | 44 | 3791 | 2015 |
| 14 | CHP | LOOK | median | 33 | 2869 | 3 |
| 14 | CHP | LOOK | recent | 33 | 2869 | 2016 |
| 14 | CHP | MUCK | max | 0 | 3000 | 1971 |
| 14 | CHP | MUCK | median | 0 | 3000 | 1 |
| 14 | CHP | MUCK | recent | 0 | 3000 | 1971 |
| 14 | CHP | NEPT | max | 0 | 115 | 1971 |
| 14 | CHP | NEPT | median | 0 | 115 | 1 |
| 14 | CHP | NEPT | recent | 0 | 115 | 1971 |
| 14 | CHP | OBRI | max | 1 | 21400 | 1976 |
| 14 | CHP | OBRI | median | 1 | 21400 | 1 |
| 14 | CHP | OBRI | recent | 1 | 21400 | 1976 |
| 14 | CHP | PILL | max | 1 | 8762 | 1977 |
| 14 | CHP | PILL | median | 1 | 8762 | 1 |
| 14 | CHP | PILL | recent | 1 | 8762 | 1977 |
| 14 | CHP | PKUP | max | 0 | 217 | 1971 |
| 14 | CHP | PKUP | median | 0 | 217 | 1 |
| 14 | CHP | PKUP | recent | 0 | 217 | 1971 |
| 14 | CHP | PLDR | max | 1 | 4276 | 1971 |
| 14 | CHP | PLDR | median | 1 | 4276 | 1 |
| 14 | CHP | PLDR | recent | 1 | 4276 | 1971 |
| 14 | CHP | PPPT | max | 14232 | 58500 | 1976 |
| 14 | CHP | PPPT | median | 14232 | 58500 | 1 |
| 14 | CHP | PPPT | recent | 14232 | 58500 | 1976 |
| 14 | CHP | PTWD | max | 2268 | 9604 | 1971 |
| 14 | CHP | PTWD | median | 2268 | 9604 | 1 |
| 14 | CHP | PTWD | recent | 2268 | 9604 | 1971 |
| 14 | CHP | SERA | max | 781 | 6616 | 1977 |
| 14 | CHP | SERA | median | 781 | 6616 | 1 |
| 14 | CHP | SERA | recent | 781 | 6616 | 1977 |
| 14 | CHP | SPLI | max | 0 | 24 | 1971 |
| 14 | CHP | SPLI | median | 0 | 24 | 1 |
| 14 | CHP | SPLI | recent | 0 | 24 | 1971 |
| 14 | CHP | THUN | max | 5 | 16827 | 1976 |
| 14 | CHP | THUN | median | 5 | 16827 | 1 |
| 14 | CHP | THUN | recent | 5 | 16827 | 1976 |
| 14 | CHP | TRGR | max | 4 | 348 | 2020 |
| 14 | CHP | TRGR | median | 4 | 348 | 1 |
| 14 | CHP | TRGR | recent | 4 | 348 | 2020 |
| 14 | CHP | TWIN | max | 17 | 78 | 1971 |
| 14 | CHP | TWIN | median | 17 | 78 | 1 |
| 14 | CHP | TWIN | recent | 17 | 78 | 1971 |
| 14 | CHP | VALE | max | 0 | 254 | 1971 |
| 14 | CHP | VALE | median | 0 | 188 | 2 |
| 14 | CHP | VALE | recent | 0 | 123 | 2015 |
| 14 | CHP | WALK | max | 0 | 453 | 1971 |
| 14 | CHP | WALK | median | 0 | 453 | 1 |
| 14 | CHP | WALK | recent | 0 | 453 | 1971 |
| 14 | CHP | WELC | max | 71 | 253 | 1971 |
| 14 | CHP | WELC | median | 71 | 253 | 1 |
| 14 | CHP | WELC | recent | 71 | 253 | 1971 |

# Antarctica marine IBA: 15

| Site code | 15 |
| --- | --- |
| Species | CHP |
| IBA criteria | A4: Congregations |
| Decimal Latitude | -61.081 |
| Decimal Longitude | -54.862 |
| Area (ha) | 7022.016 |
| Area (km2) | 70.22016 |
| MPA Overlap | D1MPA |
| MPA Type | Proposed |
| MPA Zones | KFZ-NWAP |


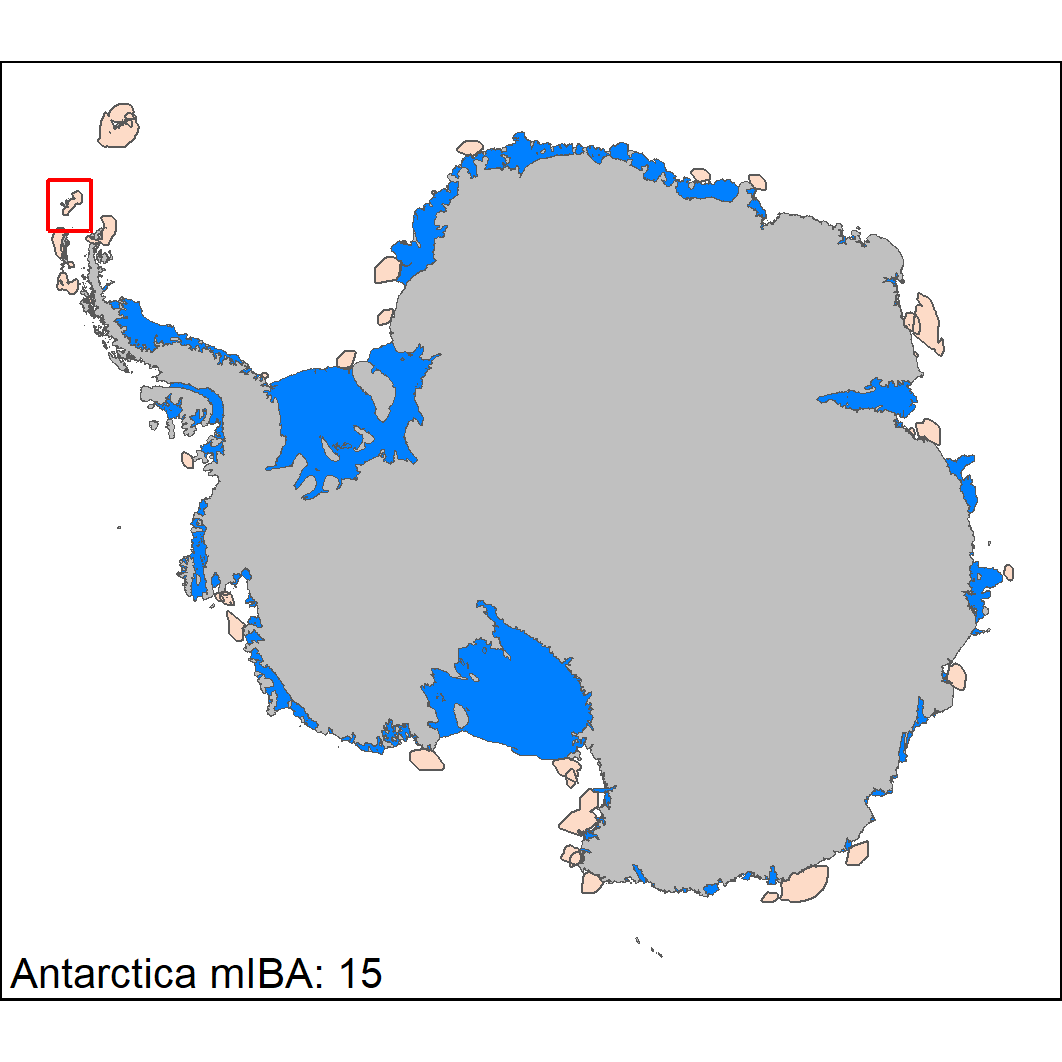


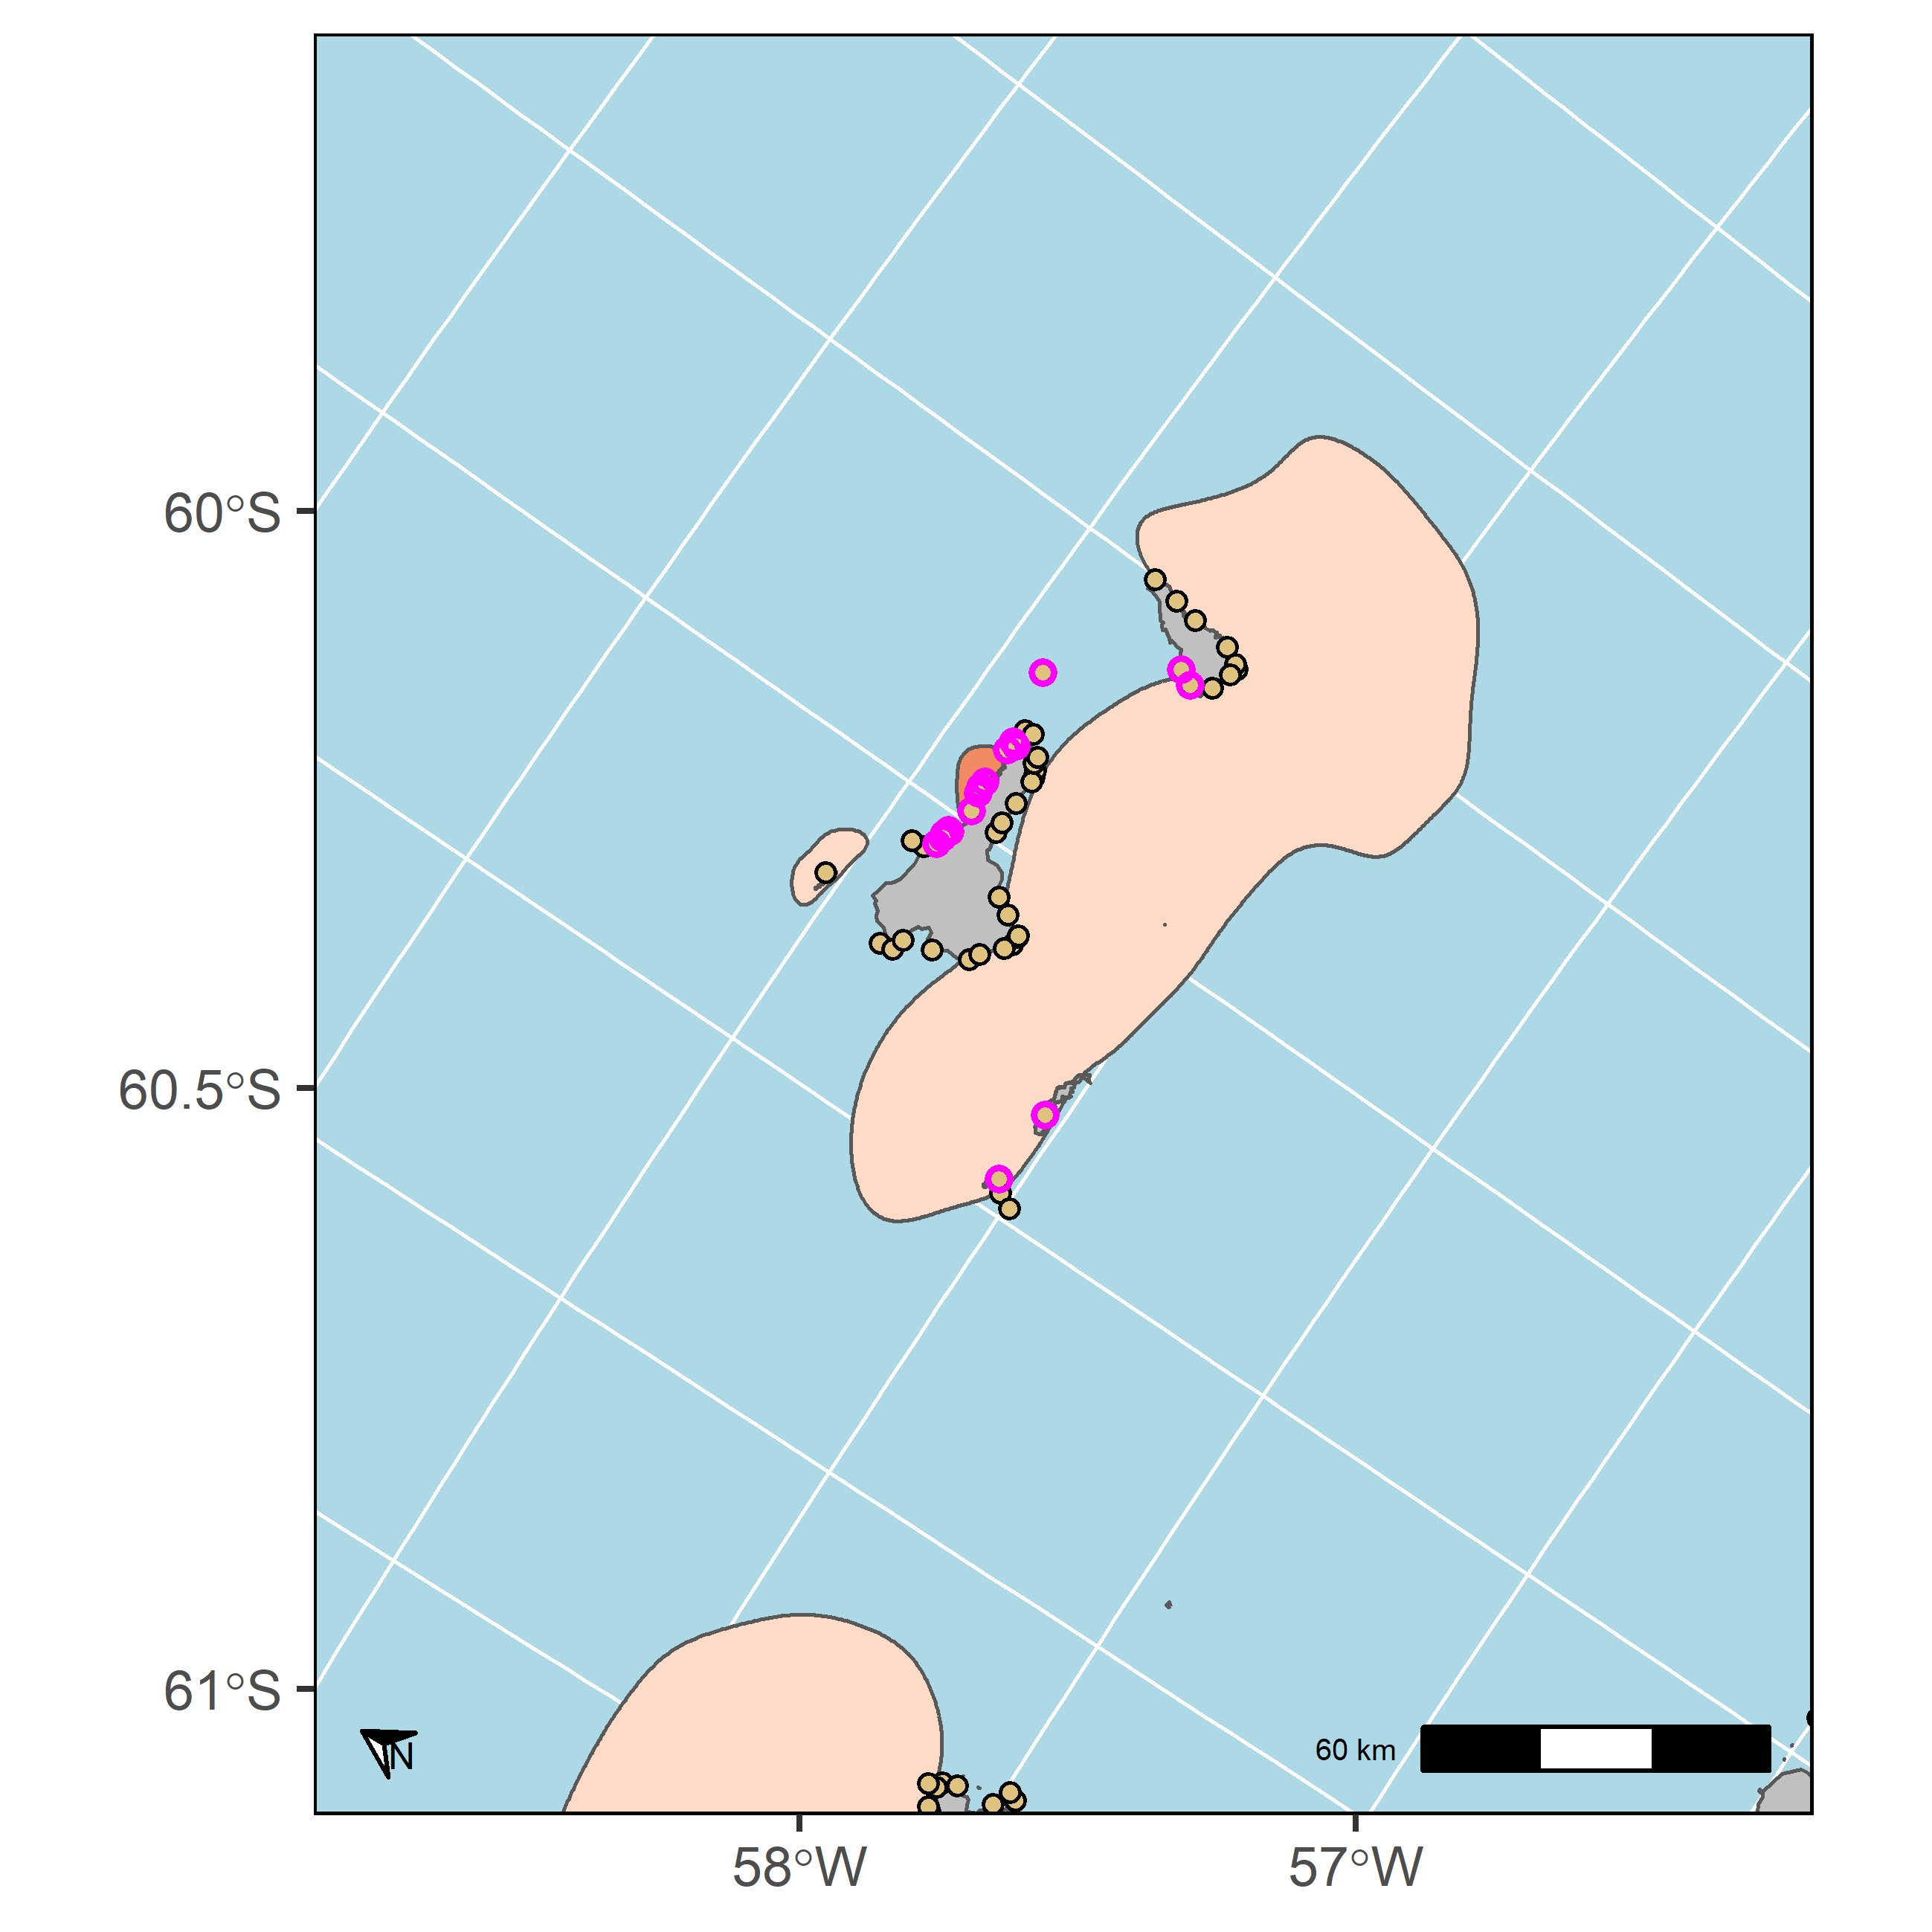


Figure A15.1: Focal Antarctica marine IBA 15 (orange polygon) for penguins, and other marine IBAs (light orange) for penguins identified during the project. Colonies circled in purple are those whose populations contributed to the marine IBA triggering IBA criteria A4 (>1% of the global population). See Table A15.2.

Table A15.1: Population estimates and count types (those that triggered IBA Criteria A4, >1% of global population) for key penguin species in Antarctic marine IBA 15. Key sources of colony input data associated with this marine IBA are detailed in Table A15.2. Population estimates refer to the lower and upper estimated number of adult breeding pairs likely to be using the marine IBA; derived from summing over all cells from individual colony density distribution surfaces which contributed to the identification of the marine IBA.

| Site code | Species | Count type | Lower | Upper |
| --- | --- | --- | --- | --- |
| 15 | CHP | min | 34921 | 44342 |
| 15 | CHP | max | 34921 | 44342 |
| 15 | CHP | median | 34921 | 44342 |
| 15 | CHP | recent | 34921 | 44342 |

Table A15.2: Population estimates (adult breeding pairs) and count types from individual colony(ies) density distribution surfaces which contributed to the identification of marine IBA: 15. I.e. The lower and upper estimated number of adult breeding pairs from a given colony that may utilise the marine IBA. Note, the lower population estimate represents the lowest estimated number of breeding pairs from a given colony contributing to the delineation of the marine IBA site. The lower population estimate may therefore be zero when only part of the individual colony(ies) density distribution surface contributed to the marine IBA. *The Count Year for the median population estimate indicates the number of yearly population assessments for the given colony. Colony names are given in the ‘Colony Codes’ table at the end of this document.

| Site code | Species | Colony | Count type | Lower | Upper | Count year* |
| --- | --- | --- | --- | --- | --- | --- |
| 15 | CHP | ASPL | min | 2 | 3 | 1976 |
| 15 | CHP | ASPL | max | 2 | 3 | 1976 |
| 15 | CHP | ASPL | median | 2 | 3 | 1 |
| 15 | CHP | ASPL | recent | 2 | 3 | 1976 |
| 15 | CHP | BELS | min | 5136 | 7000 | 1971 |
| 15 | CHP | BELS | max | 5136 | 7000 | 1971 |
| 15 | CHP | BELS | median | 5136 | 7000 | 1 |
| 15 | CHP | BELS | recent | 5136 | 7000 | 1971 |
| 15 | CHP | CHIN | min | 4846 | 7110 | 1977 |
| 15 | CHP | CHIN | max | 4846 | 7110 | 1977 |
| 15 | CHP | CHIN | median | 4846 | 7110 | 1 |
| 15 | CHP | CHIN | recent | 4846 | 7110 | 1977 |
| 15 | CHP | CRWL | min | 1215 | 1215 | 1977 |
| 15 | CHP | CRWL | max | 1215 | 1215 | 1977 |
| 15 | CHP | CRWL | median | 1215 | 1215 | 1 |
| 15 | CHP | CRWL | recent | 1215 | 1215 | 1977 |
| 15 | CHP | DECI | min | 130 | 166 | 1971 |
| 15 | CHP | DECI | max | 130 | 166 | 1971 |
| 15 | CHP | DECI | median | 130 | 166 | 1 |
| 15 | CHP | DECI | recent | 130 | 166 | 1971 |
| 15 | CHP | DPOS | min | 33 | 41 | 2020 |
| 15 | CHP | DPOS | max | 33 | 41 | 2020 |
| 15 | CHP | DPOS | median | 33 | 41 | 1 |
| 15 | CHP | DPOS | recent | 33 | 41 | 2020 |
| 15 | CHP | EIN6 | min | 34 | 47 | 2020 |
| 15 | CHP | EIN6 | max | 34 | 47 | 2020 |
| 15 | CHP | EIN6 | median | 34 | 47 | 1 |
| 15 | CHP | EIN6 | recent | 34 | 47 | 2020 |
| 15 | CHP | EIP1 | min | 820 | 1005 | 1971 |
| 15 | CHP | EIP1 | max | 820 | 1005 | 1971 |
| 15 | CHP | EIP1 | median | 820 | 1005 | 1 |
| 15 | CHP | EIP1 | recent | 820 | 1005 | 1971 |
| 15 | CHP | EIP2 | min | 505 | 627 | 1971 |
| 15 | CHP | EIP2 | max | 505 | 627 | 1971 |
| 15 | CHP | EIP2 | median | 505 | 627 | 1 |
| 15 | CHP | EIP2 | recent | 505 | 627 | 1971 |
| 15 | CHP | EIP3 | min | 254 | 318 | 1971 |
| 15 | CHP | EIP3 | max | 254 | 318 | 1971 |
| 15 | CHP | EIP3 | median | 254 | 318 | 1 |
| 15 | CHP | EIP3 | recent | 254 | 318 | 1971 |
| 15 | CHP | EIP5 | min | 12 | 15 | 1971 |
| 15 | CHP | EIP5 | max | 12 | 15 | 1971 |
| 15 | CHP | EIP5 | median | 12 | 15 | 1 |
| 15 | CHP | EIP5 | recent | 12 | 15 | 1971 |
| 15 | CHP | GIBB | min | 0 | 8537 | 2004 |
| 15 | CHP | GIBB | max | 0 | 8537 | 2004 |
| 15 | CHP | GIBB | median | 0 | 8537 | 1 |
| 15 | CHP | GIBB | recent | 0 | 8537 | 2004 |
| 15 | CHP | PILL | min | 2382 | 3490 | 1977 |
| 15 | CHP | PILL | max | 2382 | 3490 | 1977 |
| 15 | CHP | PILL | median | 2382 | 3490 | 1 |
| 15 | CHP | PILL | recent | 2382 | 3490 | 1977 |
| 15 | CHP | SAPT | min | 7461 | 10250 | 1971 |
| 15 | CHP | SAPT | max | 7461 | 10250 | 1971 |
| 15 | CHP | SAPT | median | 7461 | 10250 | 1 |
| 15 | CHP | SAPT | recent | 7461 | 10250 | 1971 |
| 15 | CHP | SHIL | min | 2882 | 4000 | 1971 |
| 15 | CHP | SHIL | max | 2882 | 4000 | 1971 |
| 15 | CHP | SHIL | median | 2882 | 4000 | 1 |
| 15 | CHP | SHIL | recent | 2882 | 4000 | 1971 |
| 15 | CHP | WILD | min | 7635 | 8861 | 2006 |
| 15 | CHP | WILD | max | 7635 | 8861 | 2006 |
| 15 | CHP | WILD | median | 7635 | 8861 | 1 |
| 15 | CHP | WILD | recent | 7635 | 8861 | 2006 |
| 15 | CHP | WSAD | min | 535 | 1000 | 1971 |
| 15 | CHP | WSAD | max | 535 | 1000 | 1971 |
| 15 | CHP | WSAD | median | 535 | 1000 | 1 |
| 15 | CHP | WSAD | recent | 535 | 1000 | 1971 |

# Antarctica marine IBA: 16

| Site code | 16 |
| --- | --- |
| Species | CHP |
| IBA criteria | A4: Congregations |
| Decimal Latitude | -60.967 |
| Decimal Longitude | -55.368 |
| Area (ha) | 10120.8 |
| Area (km2) | 101.208 |
| MPA Overlap | D1MPA |
| MPA Type | Proposed |
| MPA Zones | KFZ-NWAP |


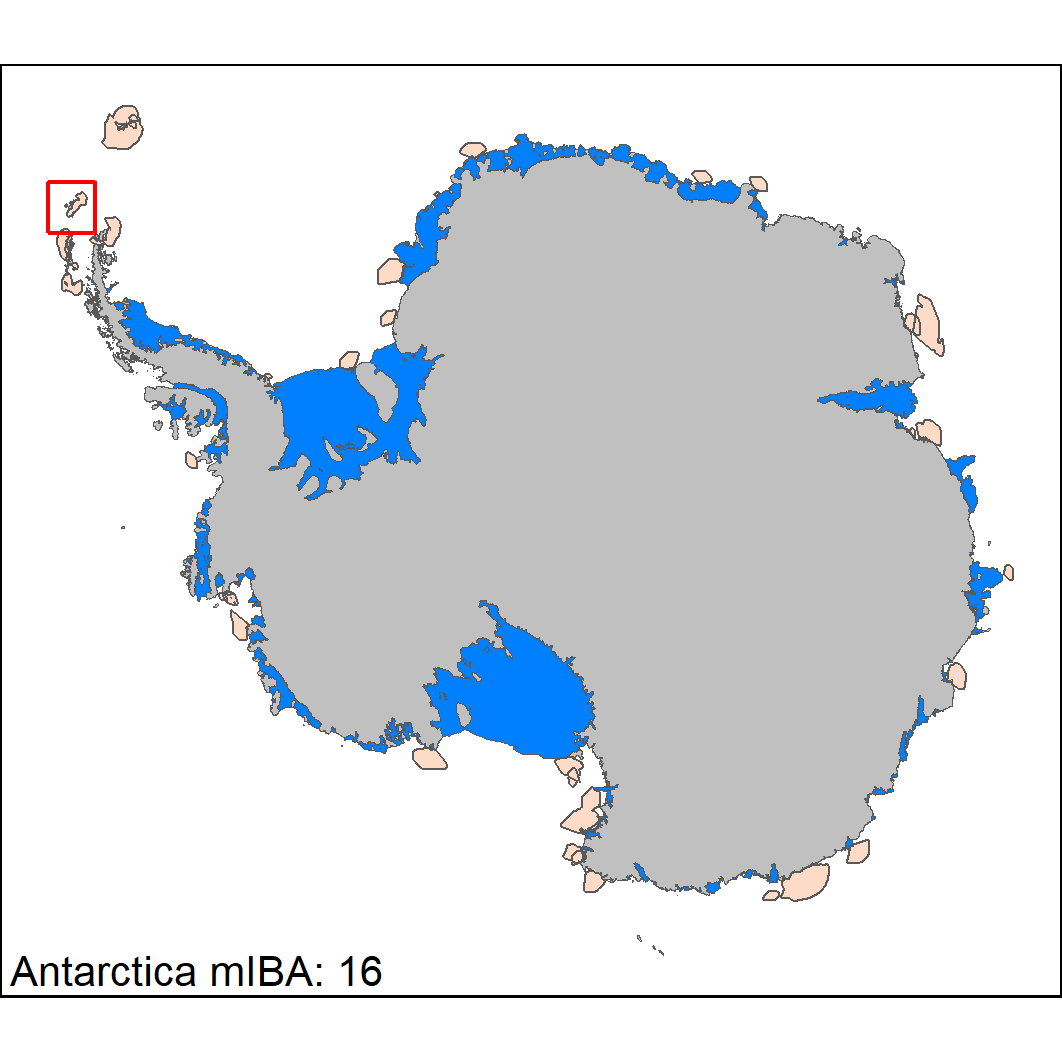


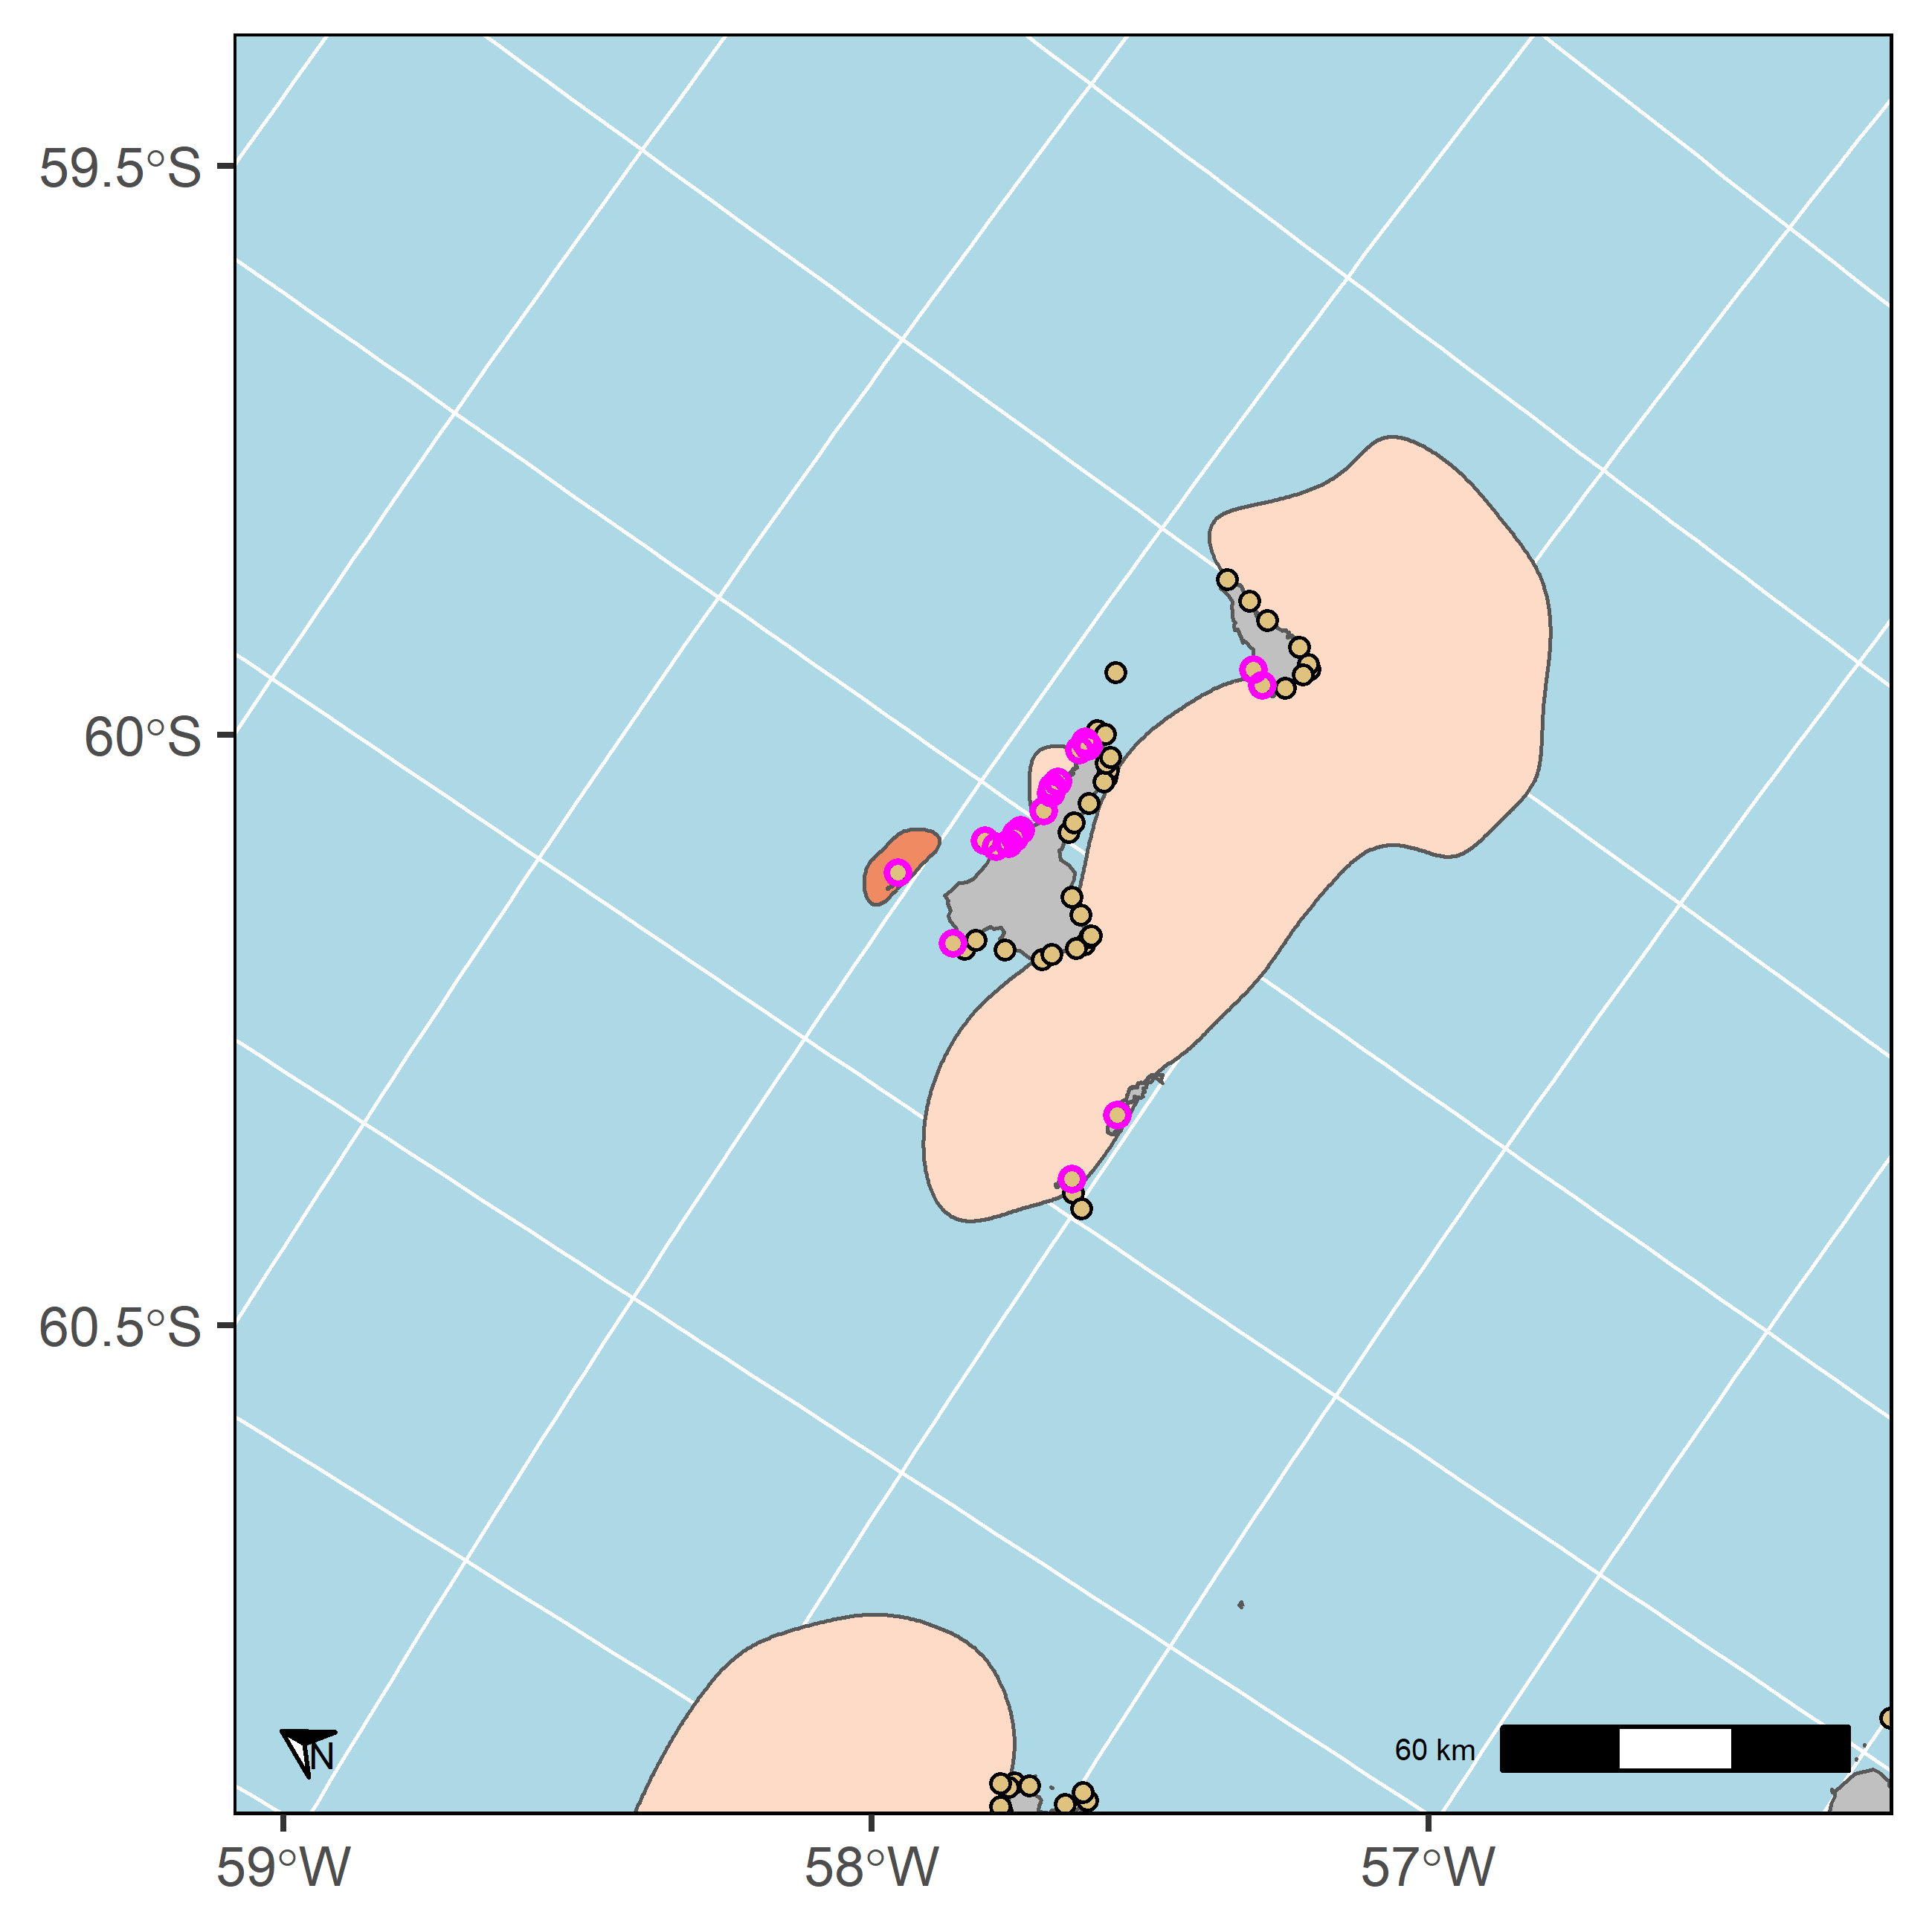


Figure A16.1: Focal Antarctica marine IBA 16 (orange polygon) for penguins, and other marine IBAs (light orange) for penguins identified during the project. Colonies circled in purple are those whose populations contributed to the marine IBA triggering IBA criteria A4 (>1% of the global population). See Table A16.2.

Table A16.1: Population estimates and count types (those that triggered IBA Criteria A4, >1% of global population) for key penguin species in Antarctic marine IBA 16. Key sources of colony input data associated with this marine IBA are detailed in Table A16.2. Population estimates refer to the lower and upper estimated number of adult breeding pairs likely to be using the marine IBA; derived from summing over all cells from individual colony density distribution surfaces which contributed to the identification of the marine IBA.

| Site code | Species | Count type | Lower | Upper |
| --- | --- | --- | --- | --- |
| 16 | CHP | min | 34513 | 42731 |
| 16 | CHP | max | 34513 | 42731 |
| 16 | CHP | median | 34513 | 42731 |
| 16 | CHP | recent | 34513 | 42731 |

Table A16.2: Population estimates (adult breeding pairs) and count types from individual colony(ies) density distribution surfaces which contributed to the identification of marine IBA: 16. I.e. The lower and upper estimated number of adult breeding pairs from a given colony that may utilise the marine IBA. Note, the lower population estimate represents the lowest estimated number of breeding pairs from a given colony contributing to the delineation of the marine IBA site. The lower population estimate may therefore be zero when only part of the individual colony(ies) density distribution surface contributed to the marine IBA. *The Count Year for the median population estimate indicates the number of yearly population assessments for the given colony. Colony names are given in the ‘Colony Codes’ table at the end of this document.

| Site code | Species | Colony | Count type | Lower | Upper | Count year* |
| --- | --- | --- | --- | --- | --- | --- |
| 16 | CHP | ASPL | min | 440 | 754 | 1976 |
| 16 | CHP | ASPL | max | 440 | 754 | 1976 |
| 16 | CHP | ASPL | median | 440 | 754 | 1 |
| 16 | CHP | ASPL | recent | 440 | 754 | 1976 |
| 16 | CHP | BELS | min | 2326 | 3690 | 1971 |
| 16 | CHP | BELS | max | 2326 | 3690 | 1971 |
| 16 | CHP | BELS | median | 2326 | 3690 | 1 |
| 16 | CHP | BELS | recent | 2326 | 3690 | 1971 |
| 16 | CHP | BUSK | min | 163 | 215 | 1971 |
| 16 | CHP | BUSK | max | 163 | 215 | 1971 |
| 16 | CHP | BUSK | median | 163 | 215 | 1 |
| 16 | CHP | BUSK | recent | 163 | 215 | 1971 |
| 16 | CHP | CHIN | min | 598 | 604 | 1977 |
| 16 | CHP | CHIN | max | 598 | 604 | 1977 |
| 16 | CHP | CHIN | median | 598 | 604 | 1 |
| 16 | CHP | CHIN | recent | 598 | 604 | 1977 |
| 16 | CHP | CLIN | min | 399 | 399 | 1971 |
| 16 | CHP | CLIN | max | 399 | 399 | 1971 |
| 16 | CHP | CLIN | median | 399 | 399 | 1 |
| 16 | CHP | CLIN | recent | 399 | 399 | 1971 |
| 16 | CHP | DECI | min | 49 | 72 | 1971 |
| 16 | CHP | DECI | max | 49 | 72 | 1971 |
| 16 | CHP | DECI | median | 49 | 72 | 1 |
| 16 | CHP | DECI | recent | 49 | 72 | 1971 |
| 16 | CHP | DPOS | min | 15 | 20 | 2020 |
| 16 | CHP | DPOS | max | 15 | 20 | 2020 |
| 16 | CHP | DPOS | median | 15 | 20 | 1 |
| 16 | CHP | DPOS | recent | 15 | 20 | 2020 |
| 16 | CHP | EIP0 | min | 122 | 160 | 1971 |
| 16 | CHP | EIP0 | max | 122 | 160 | 1971 |
| 16 | CHP | EIP0 | median | 122 | 160 | 1 |
| 16 | CHP | EIP0 | recent | 122 | 160 | 1971 |
| 16 | CHP | EIP1 | min | 596 | 790 | 1971 |
| 16 | CHP | EIP1 | max | 596 | 790 | 1971 |
| 16 | CHP | EIP1 | median | 596 | 790 | 1 |
| 16 | CHP | EIP1 | recent | 596 | 790 | 1971 |
| 16 | CHP | EIP2 | min | 362 | 478 | 1971 |
| 16 | CHP | EIP2 | max | 362 | 478 | 1971 |
| 16 | CHP | EIP2 | median | 362 | 478 | 1 |
| 16 | CHP | EIP2 | recent | 362 | 478 | 1971 |
| 16 | CHP | EIP3 | min | 181 | 239 | 1971 |
| 16 | CHP | EIP3 | max | 181 | 239 | 1971 |
| 16 | CHP | EIP3 | median | 181 | 239 | 1 |
| 16 | CHP | EIP3 | recent | 181 | 239 | 1971 |
| 16 | CHP | EIP5 | min | 9 | 11 | 1971 |
| 16 | CHP | EIP5 | max | 9 | 11 | 1971 |
| 16 | CHP | EIP5 | median | 9 | 11 | 1 |
| 16 | CHP | EIP5 | recent | 9 | 11 | 1971 |
| 16 | CHP | GIBB | min | 5353 | 8499 | 2004 |
| 16 | CHP | GIBB | max | 5353 | 8499 | 2004 |
| 16 | CHP | GIBB | median | 5353 | 8499 | 1 |
| 16 | CHP | GIBB | recent | 5353 | 8499 | 2004 |
| 16 | CHP | PILL | min | 294 | 297 | 1977 |
| 16 | CHP | PILL | max | 294 | 297 | 1977 |
| 16 | CHP | PILL | median | 294 | 297 | 1 |
| 16 | CHP | PILL | recent | 294 | 297 | 1977 |
| 16 | CHP | SAPT | min | 3448 | 5475 | 1971 |
| 16 | CHP | SAPT | max | 3448 | 5475 | 1971 |
| 16 | CHP | SAPT | median | 3448 | 5475 | 1 |
| 16 | CHP | SAPT | recent | 3448 | 5475 | 1971 |
| 16 | CHP | SEAL | min | 13509 | 20000 | 1987 |
| 16 | CHP | SEAL | max | 13509 | 20000 | 1987 |
| 16 | CHP | SEAL | median | 13509 | 20000 | 1 |
| 16 | CHP | SEAL | recent | 13509 | 20000 | 1987 |
| 16 | CHP | SHIL | min | 1232 | 1692 | 1971 |
| 16 | CHP | SHIL | max | 1232 | 1692 | 1971 |
| 16 | CHP | SHIL | median | 1232 | 1692 | 1 |
| 16 | CHP | SHIL | recent | 1232 | 1692 | 1971 |
| 16 | CHP | WILD | min | 3149 | 4701 | 2006 |
| 16 | CHP | WILD | max | 3149 | 4701 | 2006 |
| 16 | CHP | WILD | median | 3149 | 4701 | 1 |
| 16 | CHP | WILD | recent | 3149 | 4701 | 2006 |
| 16 | CHP | WSAD | min | 303 | 404 | 1971 |
| 16 | CHP | WSAD | max | 303 | 404 | 1971 |
| 16 | CHP | WSAD | median | 303 | 404 | 1 |
| 16 | CHP | WSAD | recent | 303 | 404 | 1971 |

# Antarctica marine IBA: 17

| Site code | 17 |
| --- | --- |
| Species | CHP |
| IBA criteria | A4: Congregations |
| Decimal Latitude | -60.709 |
| Decimal Longitude | -45.644 |
| Area (ha) | 3922300 |
| Area (km2) | 39223 |
| MPA Overlap | D1MPA |
| MPA Type | Proposed |
| MPA Zones | GPZ-SOI,KFZ-SOI,SO-SS |


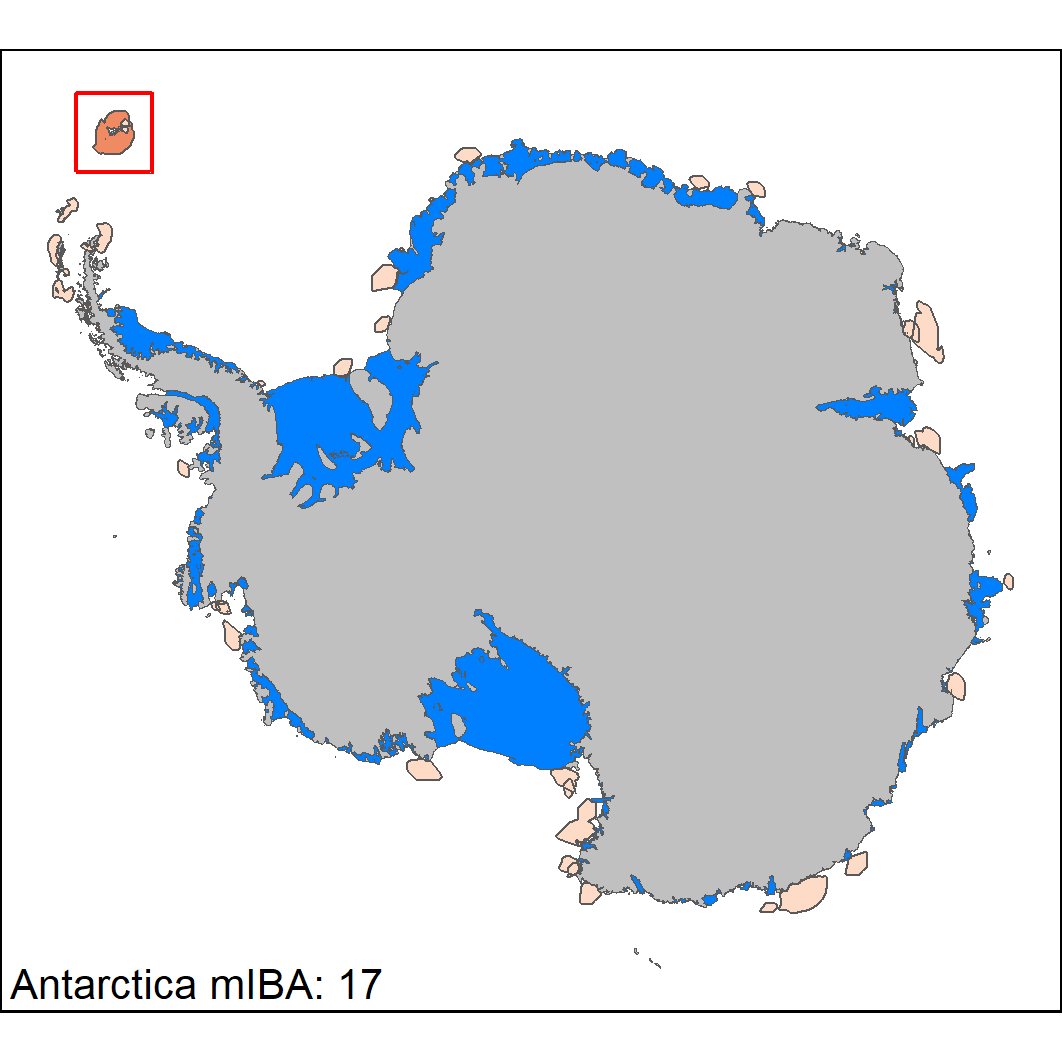


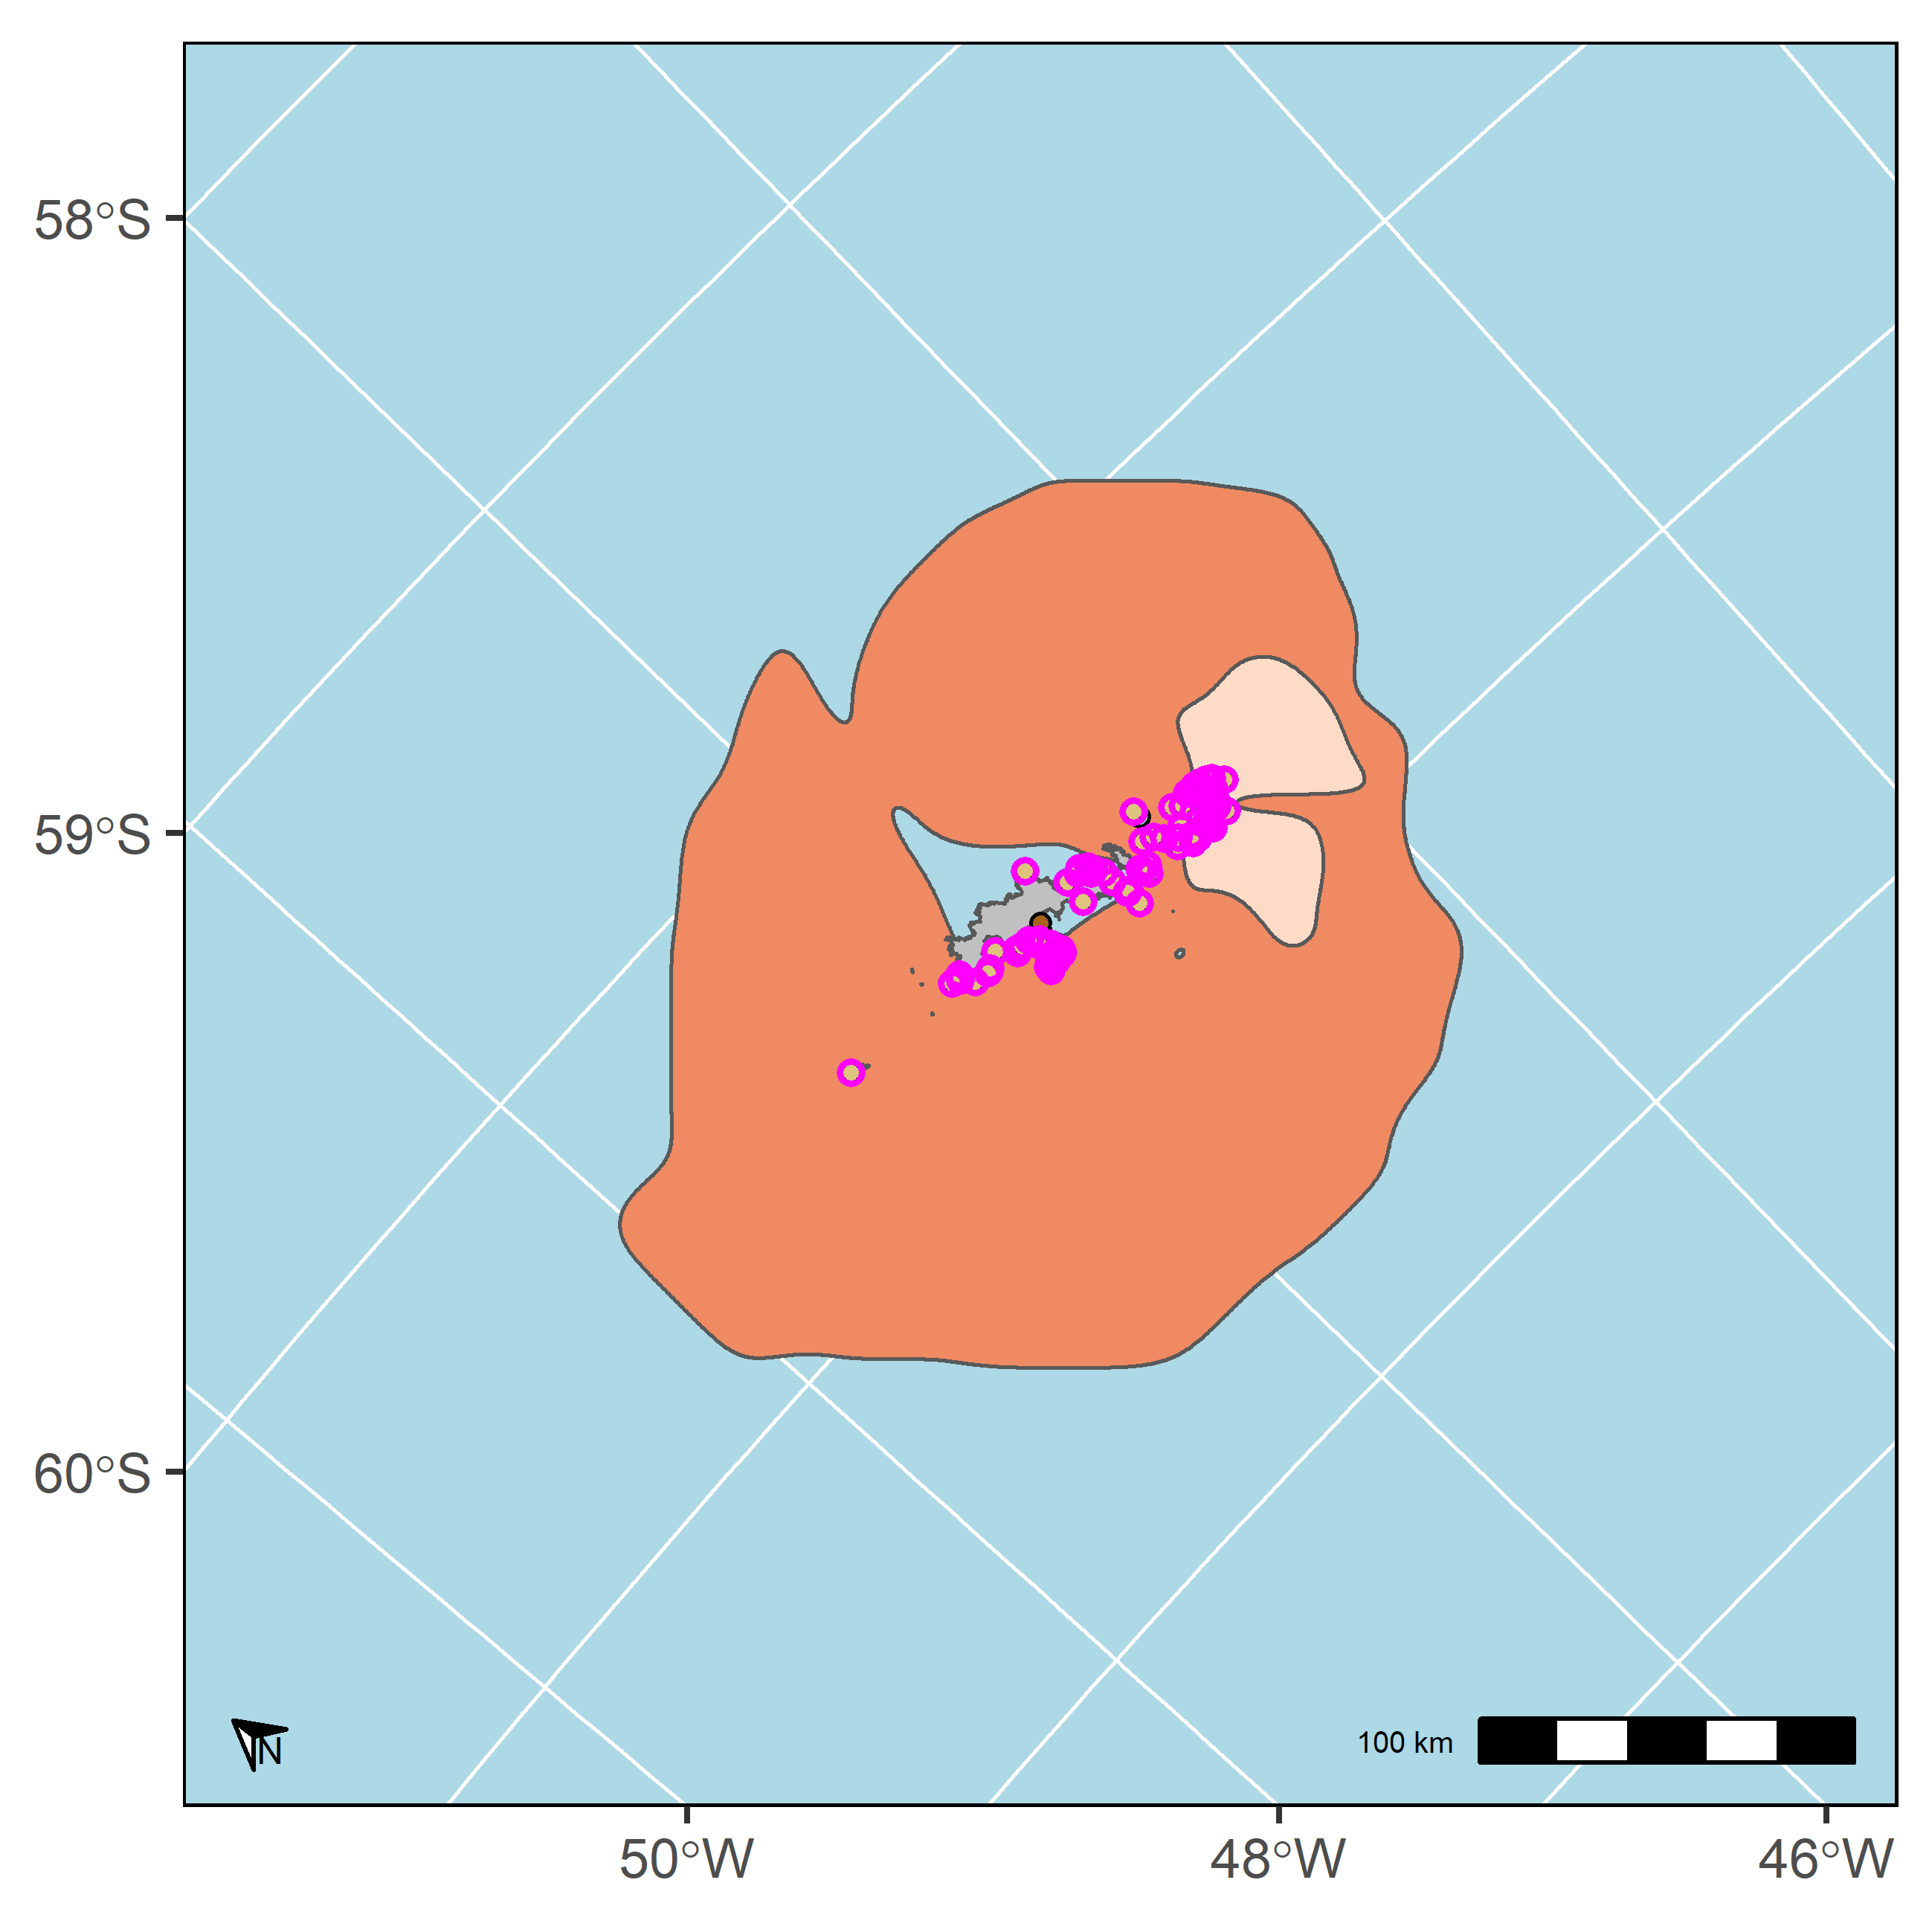


Figure A17.1: Focal Antarctica marine IBA 17 (orange polygon) for penguins, and other marine IBAs (light orange) for penguins identified during the project. Colonies circled in purple are those whose populations contributed to the marine IBA triggering IBA criteria A4 (>1% of the global population). See Table A17.2.

Table A17.1: Population estimates and count types (those that triggered IBA Criteria A4, >1% of global population) for key penguin species in Antarctic marine IBA 17. Key sources of colony input data associated with this marine IBA are detailed in Table A17.2. Population estimates refer to the lower and upper estimated number of adult breeding pairs likely to be using the marine IBA; derived from summing over all cells from individual colony density distribution surfaces which contributed to the identification of the marine IBA.

| Site code | Species | Count type | Lower | Upper |
| --- | --- | --- | --- | --- |
| 17 | CHP | max | 34100 | 467235 |
| 17 | CHP | median | 34100 | 465621 |
| 17 | CHP | recent | 34100 | 464008 |

Table A17.2: Population estimates (adult breeding pairs) and count types from individual colony(ies) density distribution surfaces which contributed to the identification of marine IBA: 17. I.e. The lower and upper estimated number of adult breeding pairs from a given colony that may utilise the marine IBA. Note, the lower population estimate represents the lowest estimated number of breeding pairs from a given colony contributing to the delineation of the marine IBA site. The lower population estimate may therefore be zero when only part of the individual colony(ies) density distribution surface contributed to the marine IBA. *The Count Year for the median population estimate indicates the number of yearly population assessments for the given colony. Colony names are given in the ‘Colony Codes’ table at the end of this document.

| Site code | Species | Colony | Count type | Lower | Upper | Count year* |
| --- | --- | --- | --- | --- | --- | --- |
| 17 | CHP | ACUN | max | 0 | 4000 | 1983 |
| 17 | CHP | ACUN | median | 0 | 4000 | 1 |
| 17 | CHP | ACUN | recent | 0 | 4000 | 1983 |
| 17 | CHP | AILS | max | 0 | 6000 | 1983 |
| 17 | CHP | AILS | median | 0 | 6000 | 1 |
| 17 | CHP | AILS | recent | 0 | 6000 | 1983 |
| 17 | CHP | AITK | max | 0 | 3300 | 1983 |
| 17 | CHP | AITK | median | 0 | 3300 | 1 |
| 17 | CHP | AITK | recent | 0 | 3300 | 1983 |
| 17 | CHP | AMPH | max | 0 | 3324 | 1983 |
| 17 | CHP | AMPH | median | 0 | 3324 | 1 |
| 17 | CHP | AMPH | recent | 0 | 3324 | 1983 |
| 17 | CHP | ANDE | max | 0 | 100 | 1983 |
| 17 | CHP | ANDE | median | 0 | 100 | 1 |
| 17 | CHP | ANDE | recent | 0 | 100 | 1983 |
| 17 | CHP | BENN | max | 370 | 6568 | 1983 |
| 17 | CHP | BENN | median | 370 | 6568 | 1 |
| 17 | CHP | BENN | recent | 370 | 6568 | 1983 |
| 17 | CHP | BRUC | max | 0 | 5000 | 1956 |
| 17 | CHP | BRUC | median | 0 | 5000 | 1 |
| 17 | CHP | BRUC | recent | 0 | 5000 | 1956 |
| 17 | CHP | BUCH | max | 998 | 6500 | 1983 |
| 17 | CHP | BUCH | median | 998 | 6500 | 1 |
| 17 | CHP | BUCH | recent | 998 | 6500 | 1983 |
| 17 | CHP | CHEA | max | 0 | 22500 | 1984 |
| 17 | CHP | CHEA | median | 0 | 22500 | 1 |
| 17 | CHP | CHEA | recent | 0 | 22500 | 1984 |
| 17 | CHP | CHEC | max | 107 | 1813 | 1983 |
| 17 | CHP | CHEC | median | 107 | 1813 | 1 |
| 17 | CHP | CHEC | recent | 107 | 1813 | 1983 |
| 17 | CHP | COFF | max | 171 | 1768 | 1983 |
| 17 | CHP | COFF | median | 171 | 1768 | 1 |
| 17 | CHP | COFF | recent | 171 | 1768 | 1983 |
| 17 | CHP | CONF | max | 639 | 7736 | 1979 |
| 17 | CHP | CONF | median | 639 | 7736 | 1 |
| 17 | CHP | CONF | recent | 639 | 7736 | 1979 |
| 17 | CHP | CROB | max | 1639 | 32000 | 1983 |
| 17 | CHP | CROB | median | 1639 | 32000 | 1 |
| 17 | CHP | CROB | recent | 1639 | 32000 | 1983 |
| 17 | CHP | CROW | max | 160 | 1562 | 1983 |
| 17 | CHP | CROW | median | 160 | 1562 | 1 |
| 17 | CHP | CROW | recent | 160 | 1562 | 1983 |
| 17 | CHP | CVIK | max | 0 | 6449 | 1965 |
| 17 | CHP | CVIK | median | 0 | 6449 | 1 |
| 17 | CHP | CVIK | recent | 0 | 6449 | 1965 |
| 17 | CHP | ECAP | max | 149 | 1680 | 1983 |
| 17 | CHP | ECAP | median | 149 | 1680 | 1 |
| 17 | CHP | ECAP | recent | 149 | 1680 | 1983 |
| 17 | CHP | ELLI | max | 2842 | 21400 | 1983 |
| 17 | CHP | ELLI | median | 2842 | 21400 | 1 |
| 17 | CHP | ELLI | recent | 2842 | 21400 | 1983 |
| 17 | CHP | FERG | max | 0 | 7420 | 1983 |
| 17 | CHP | FERG | median | 0 | 7420 | 1 |
| 17 | CHP | FERG | recent | 0 | 7420 | 1983 |
| 17 | CHP | FERR | max | 2858 | 14200 | 1983 |
| 17 | CHP | FERR | median | 2858 | 14200 | 1 |
| 17 | CHP | FERR | recent | 2858 | 14200 | 1983 |
| 17 | CHP | FITC | max | 0 | 1200 | 1983 |
| 17 | CHP | FITC | median | 0 | 1200 | 1 |
| 17 | CHP | FITC | recent | 0 | 1200 | 1983 |
| 17 | CHP | FLOR | max | 0 | 500 | 1983 |
| 17 | CHP | FLOR | median | 0 | 500 | 1 |
| 17 | CHP | FLOR | recent | 0 | 500 | 1983 |
| 17 | CHP | FRED | max | 0 | 40820 | 1983 |
| 17 | CHP | FRED | median | 0 | 40820 | 1 |
| 17 | CHP | FRED | recent | 0 | 40820 | 1983 |
| 17 | CHP | FYRC | max | 253 | 6018 | 1978 |
| 17 | CHP | FYRC | median | 154 | 3659 | 2 |
| 17 | CHP | FYRC | recent | 55 | 1300 | 1979 |
| 17 | CHP | GEDD | max | 0 | 5000 | 1983 |
| 17 | CHP | GEDD | median | 0 | 5000 | 1 |
| 17 | CHP | GEDD | recent | 0 | 5000 | 1983 |
| 17 | CHP | GERD | max | 0 | 18 | 1984 |
| 17 | CHP | GERD | median | 0 | 18 | 1 |
| 17 | CHP | GERD | recent | 0 | 18 | 1984 |
| 17 | CHP | GIBA | max | 5 | 51 | 1983 |
| 17 | CHP | GIBA | median | 5 | 51 | 1 |
| 17 | CHP | GIBA | recent | 5 | 51 | 1983 |
| 17 | CHP | GOPT | max | 0 | 13115 | 1978 |
| 17 | CHP | GOPT | median | 0 | 13115 | 1 |
| 17 | CHP | GOPT | recent | 0 | 13115 | 1978 |
| 17 | CHP | GOSL | max | 0 | 9764 | 1984 |
| 17 | CHP | GOSL | median | 0 | 9764 | 1 |
| 17 | CHP | GOSL | recent | 0 | 9764 | 1984 |
| 17 | CHP | GOWC | max | 0 | 1000 | 1984 |
| 17 | CHP | GOWC | median | 0 | 1000 | 1 |
| 17 | CHP | GOWC | recent | 0 | 1000 | 1984 |
| 17 | CHP | GREY | max | 0 | 2350 | 1983 |
| 17 | CHP | GREY | median | 0 | 2350 | 1 |
| 17 | CHP | GREY | recent | 0 | 2350 | 1983 |
| 17 | CHP | INAC | max | 0 | 1000 | 1986 |
| 17 | CHP | INAC | median | 0 | 1000 | 1 |
| 17 | CHP | INAC | recent | 0 | 1000 | 1986 |
| 17 | CHP | LARS | max | 632 | 10000 | 1984 |
| 17 | CHP | LARS | median | 632 | 10000 | 1 |
| 17 | CHP | LARS | recent | 632 | 10000 | 1984 |
| 17 | CHP | LOPT | max | 0 | 855 | 2004 |
| 17 | CHP | LOPT | median | 0 | 855 | 1 |
| 17 | CHP | LOPT | recent | 0 | 855 | 2004 |
| 17 | CHP | MABE | max | 0 | 400 | 1983 |
| 17 | CHP | MABE | median | 0 | 400 | 1 |
| 17 | CHP | MABE | recent | 0 | 400 | 1983 |
| 17 | CHP | MACO | max | 0 | 3800 | 1983 |
| 17 | CHP | MACO | median | 0 | 3800 | 1 |
| 17 | CHP | MACO | recent | 0 | 3800 | 1983 |
| 17 | CHP | MANS | max | 0 | 17 | 1984 |
| 17 | CHP | MANS | median | 0 | 17 | 1 |
| 17 | CHP | MANS | recent | 0 | 17 | 1984 |
| 17 | CHP | MARI | max | 232 | 4610 | 1978 |
| 17 | CHP | MARI | median | 232 | 4610 | 1 |
| 17 | CHP | MARI | recent | 232 | 4610 | 1978 |
| 17 | CHP | MARR | max | 0 | 11200 | 1983 |
| 17 | CHP | MARR | median | 0 | 11200 | 1 |
| 17 | CHP | MARR | recent | 0 | 11200 | 1983 |
| 17 | CHP | MART | max | 1523 | 10000 | 1983 |
| 17 | CHP | MART | median | 1523 | 10000 | 1 |
| 17 | CHP | MART | recent | 1523 | 10000 | 1983 |
| 17 | CHP | MATH | max | 1192 | 12197 | 1983 |
| 17 | CHP | MATH | median | 1192 | 12197 | 1 |
| 17 | CHP | MATH | recent | 1192 | 12197 | 1983 |
| 17 | CHP | MEPT | max | 0 | 2000 | 2013 |
| 17 | CHP | MEPT | median | 0 | 2000 | 1 |
| 17 | CHP | MEPT | recent | 0 | 2000 | 2013 |
| 17 | CHP | METH | max | 0 | 2100 | 1983 |
| 17 | CHP | METH | median | 0 | 2100 | 1 |
| 17 | CHP | METH | recent | 0 | 2100 | 1983 |
| 17 | CHP | MICH | max | 0 | 3392 | 1983 |
| 17 | CHP | MICH | median | 0 | 3392 | 1 |
| 17 | CHP | MICH | recent | 0 | 3392 | 1983 |
| 17 | CHP | MICV | max | 0 | 886 | 2004 |
| 17 | CHP | MICV | median | 0 | 886 | 1 |
| 17 | CHP | MICV | recent | 0 | 886 | 2004 |
| 17 | CHP | MLGE | max | 30 | 533 | 1978 |
| 17 | CHP | MLGE | median | 30 | 533 | 1 |
| 17 | CHP | MLGE | recent | 30 | 533 | 1978 |
| 17 | CHP | MLGW | max | 0 | 1467 | 1979 |
| 17 | CHP | MLGW | median | 0 | 1467 | 1 |
| 17 | CHP | MLGW | recent | 0 | 1467 | 1979 |
| 17 | CHP | MOEI | max | 0 | 12913 | 1978 |
| 17 | CHP | MOEI | median | 0 | 12913 | 1 |
| 17 | CHP | MOEI | recent | 0 | 12913 | 1978 |
| 17 | CHP | MOSS | max | 0 | 600 | 1983 |
| 17 | CHP | MOSS | median | 0 | 600 | 1 |
| 17 | CHP | MOSS | recent | 0 | 600 | 1983 |
| 17 | CHP | MOYE | max | 225 | 4712 | 1979 |
| 17 | CHP | MOYE | median | 225 | 4712 | 1 |
| 17 | CHP | MOYE | recent | 225 | 4712 | 1979 |
| 17 | CHP | MURR | max | 0 | 1100 | 1983 |
| 17 | CHP | MURR | median | 0 | 1100 | 1 |
| 17 | CHP | MURR | recent | 0 | 1100 | 1983 |
| 17 | CHP | NOPT | max | 0 | 6093 | 1978 |
| 17 | CHP | NOPT | median | 0 | 3921 | 2 |
| 17 | CHP | NOPT | recent | 0 | 1750 | 2015 |
| 17 | CHP | NORW | max | 0 | 148 | 1984 |
| 17 | CHP | NORW | median | 0 | 148 | 1 |
| 17 | CHP | NORW | recent | 0 | 148 | 1984 |
| 17 | CHP | OLIC | max | 7 | 143 | 1979 |
| 17 | CHP | OLIC | median | 7 | 143 | 1 |
| 17 | CHP | OLIC | recent | 7 | 143 | 1979 |
| 17 | CHP | OLII | max | 252 | 5002 | 1979 |
| 17 | CHP | OLII | median | 252 | 5002 | 1 |
| 17 | CHP | OLII | recent | 252 | 5002 | 1979 |
| 17 | CHP | PAGE | max | 0 | 1219 | 1978 |
| 17 | CHP | PAGE | median | 0 | 1219 | 1 |
| 17 | CHP | PAGE | recent | 0 | 1219 | 1978 |
| 17 | CHP | PAND | max | 737 | 14543 | 2009 |
| 17 | CHP | PAND | median | 429 | 8464 | 2 |
| 17 | CHP | PAND | recent | 737 | 14543 | 2009 |
| 17 | CHP | PANT | max | 0 | 5426 | 1978 |
| 17 | CHP | PANT | median | 0 | 5426 | 1 |
| 17 | CHP | PANT | recent | 0 | 5426 | 1978 |
| 17 | CHP | PIRI | max | 0 | 16930 | 1983 |
| 17 | CHP | PIRI | median | 0 | 16930 | 1 |
| 17 | CHP | PIRI | recent | 0 | 16930 | 1983 |
| 17 | CHP | POWE | max | 0 | 7190 | 1983 |
| 17 | CHP | POWE | median | 0 | 7190 | 1 |
| 17 | CHP | POWE | recent | 0 | 7190 | 1983 |
| 17 | CHP | PRAE | max | 0 | 400 | 1983 |
| 17 | CHP | PRAE | median | 0 | 400 | 1 |
| 17 | CHP | PRAE | recent | 0 | 400 | 1983 |
| 17 | CHP | PTCT | max | 2 | 11 | 2004 |
| 17 | CHP | PTCT | median | 2 | 11 | 1 |
| 17 | CHP | PTCT | recent | 2 | 11 | 2004 |
| 17 | CHP | PTLA | max | 0 | 855 | 2004 |
| 17 | CHP | PTLA | median | 0 | 855 | 1 |
| 17 | CHP | PTLA | recent | 0 | 855 | 2004 |
| 17 | CHP | PURD | max | 487 | 3715 | 1983 |
| 17 | CHP | PURD | median | 487 | 3715 | 1 |
| 17 | CHP | PURD | recent | 487 | 3715 | 1983 |
| 17 | CHP | RAYN | max | 931 | 8044 | 1983 |
| 17 | CHP | RAYN | median | 931 | 8044 | 1 |
| 17 | CHP | RAYN | recent | 931 | 8044 | 1983 |
| 17 | CHP | ROCA | max | 0 | 4200 | 1983 |
| 17 | CHP | ROCA | median | 0 | 4200 | 1 |
| 17 | CHP | ROCA | recent | 0 | 4200 | 1983 |
| 17 | CHP | RUDM | max | 0 | 4200 | 1983 |
| 17 | CHP | RUDM | median | 0 | 4200 | 1 |
| 17 | CHP | RUDM | recent | 0 | 4200 | 1983 |
| 17 | CHP | SADD | max | 0 | 30000 | 1903 |
| 17 | CHP | SADD | median | 0 | 30000 | 1 |
| 17 | CHP | SADD | recent | 0 | 30000 | 1903 |
| 17 | CHP | SAND | max | 13373 | 300000 | 2004 |
| 17 | CHP | SAND | median | 13373 | 300000 | 1 |
| 17 | CHP | SAND | recent | 13373 | 300000 | 2004 |
| 17 | CHP | SHAG | max | 266 | 3152 | 1978 |
| 17 | CHP | SHAG | median | 266 | 3152 | 1 |
| 17 | CHP | SHAG | recent | 266 | 3152 | 1978 |
| 17 | CHP | SHCV | max | 0 | 137 | 1994 |
| 17 | CHP | SHCV | median | 0 | 137 | 1 |
| 17 | CHP | SHCV | recent | 0 | 137 | 1994 |
| 17 | CHP | SKIL | max | 0 | 6500 | 1983 |
| 17 | CHP | SKIL | median | 0 | 6500 | 1 |
| 17 | CHP | SKIL | recent | 0 | 6500 | 1983 |
| 17 | CHP | SMAT | max | 920 | 9346 | 1983 |
| 17 | CHP | SMAT | median | 920 | 9346 | 1 |
| 17 | CHP | SMAT | recent | 920 | 9346 | 1983 |
| 17 | CHP | SPIN | max | 12632 | 125000 | 2003 |
| 17 | CHP | SPIN | median | 12632 | 125000 | 1 |
| 17 | CHP | SPIN | recent | 12632 | 125000 | 2003 |
| 17 | CHP | SPRO | max | 0 | 108 | 1978 |
| 17 | CHP | SPRO | median | 0 | 83 | 2 |
| 17 | CHP | SPRO | recent | 0 | 58 | 2015 |
| 17 | CHP | SPUI | max | 79 | 777 | 1983 |
| 17 | CHP | SPUI | median | 79 | 777 | 1 |
| 17 | CHP | SPUI | recent | 79 | 777 | 1983 |
| 17 | CHP | STEE | max | 0 | 20 | 1983 |
| 17 | CHP | STEE | median | 0 | 20 | 1 |
| 17 | CHP | STEE | recent | 0 | 20 | 1983 |
| 17 | CHP | STEN | max | 0 | 843 | 1984 |
| 17 | CHP | STEN | median | 0 | 843 | 1 |
| 17 | CHP | STEN | recent | 0 | 843 | 1984 |
| 17 | CHP | TTUR | max | 379 | 3248 | 1983 |
| 17 | CHP | TTUR | median | 379 | 3248 | 1 |
| 17 | CHP | TTUR | recent | 379 | 3248 | 1983 |
| 17 | CHP | VAIS | max | 0 | 4000 | 1983 |
| 17 | CHP | VAIS | median | 0 | 4000 | 1 |
| 17 | CHP | VAIS | recent | 0 | 4000 | 1983 |
| 17 | CHP | WHIT | max | 830 | 4000 | 1947 |
| 17 | CHP | WHIT | median | 830 | 4000 | 1 |
| 17 | CHP | WHIT | recent | 830 | 4000 | 1947 |
| 17 | CHP | WPEC | max | 310 | 11250 | 1983 |
| 17 | CHP | WPEC | median | 310 | 11250 | 1 |
| 17 | CHP | WPEC | recent | 310 | 11250 | 1983 |
| 17 | CHP | WPWC | max | 0 | 2750 | 1983 |
| 17 | CHP | WPWC | median | 0 | 2750 | 1 |
| 17 | CHP | WPWC | recent | 0 | 2750 | 1983 |

# Antarctica marine IBA: 18

| Site code | 18 |
| --- | --- |
| Species | ADP,CHP |
| IBA criteria | A4: Congregations |
| Decimal Latitude | -60.803 |
| Decimal Longitude | -44.322 |
| Area (ha) | 252177.1 |
| Area (km2) | 2521.771 |
| MPA Overlap | D1MPA |
| MPA Type | Proposed |
| MPA Zones | GPZ-SOI |


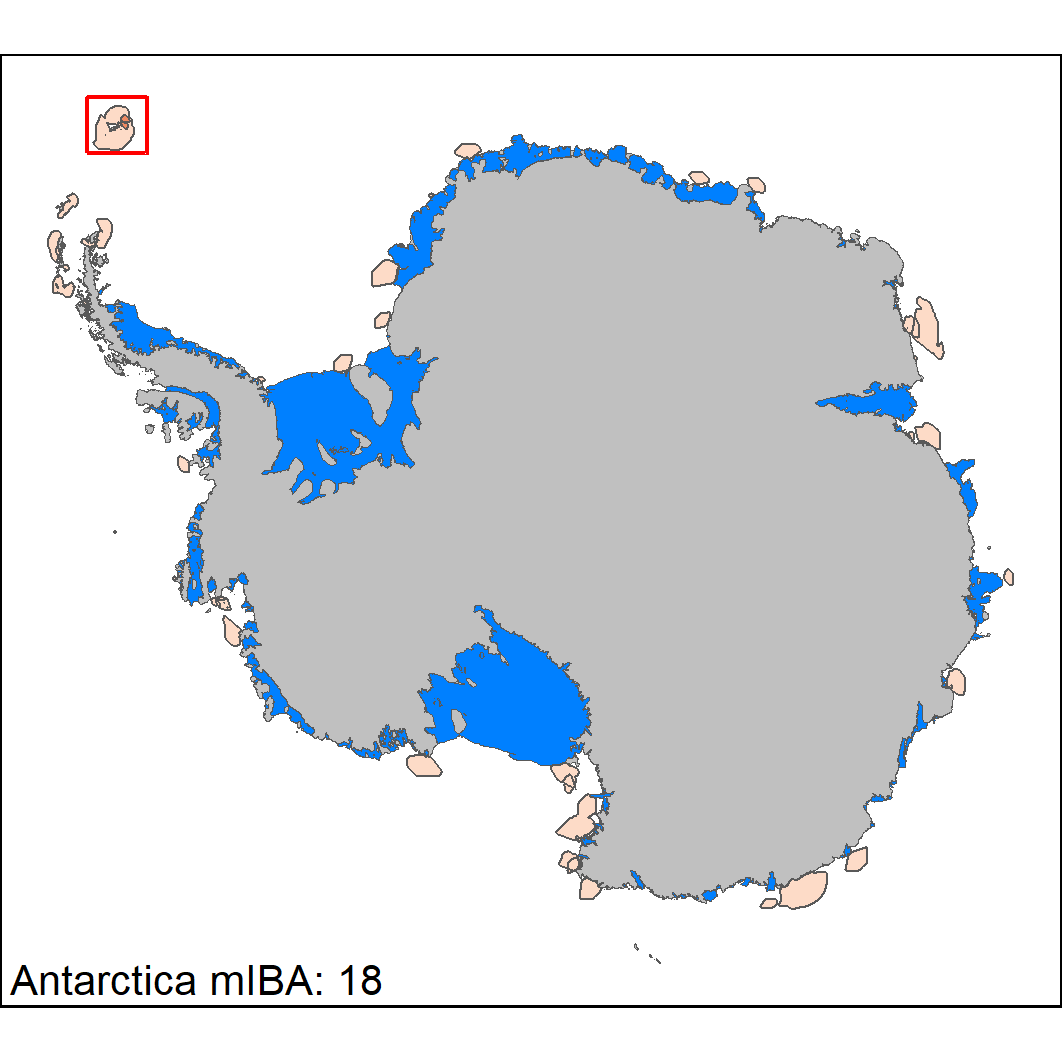


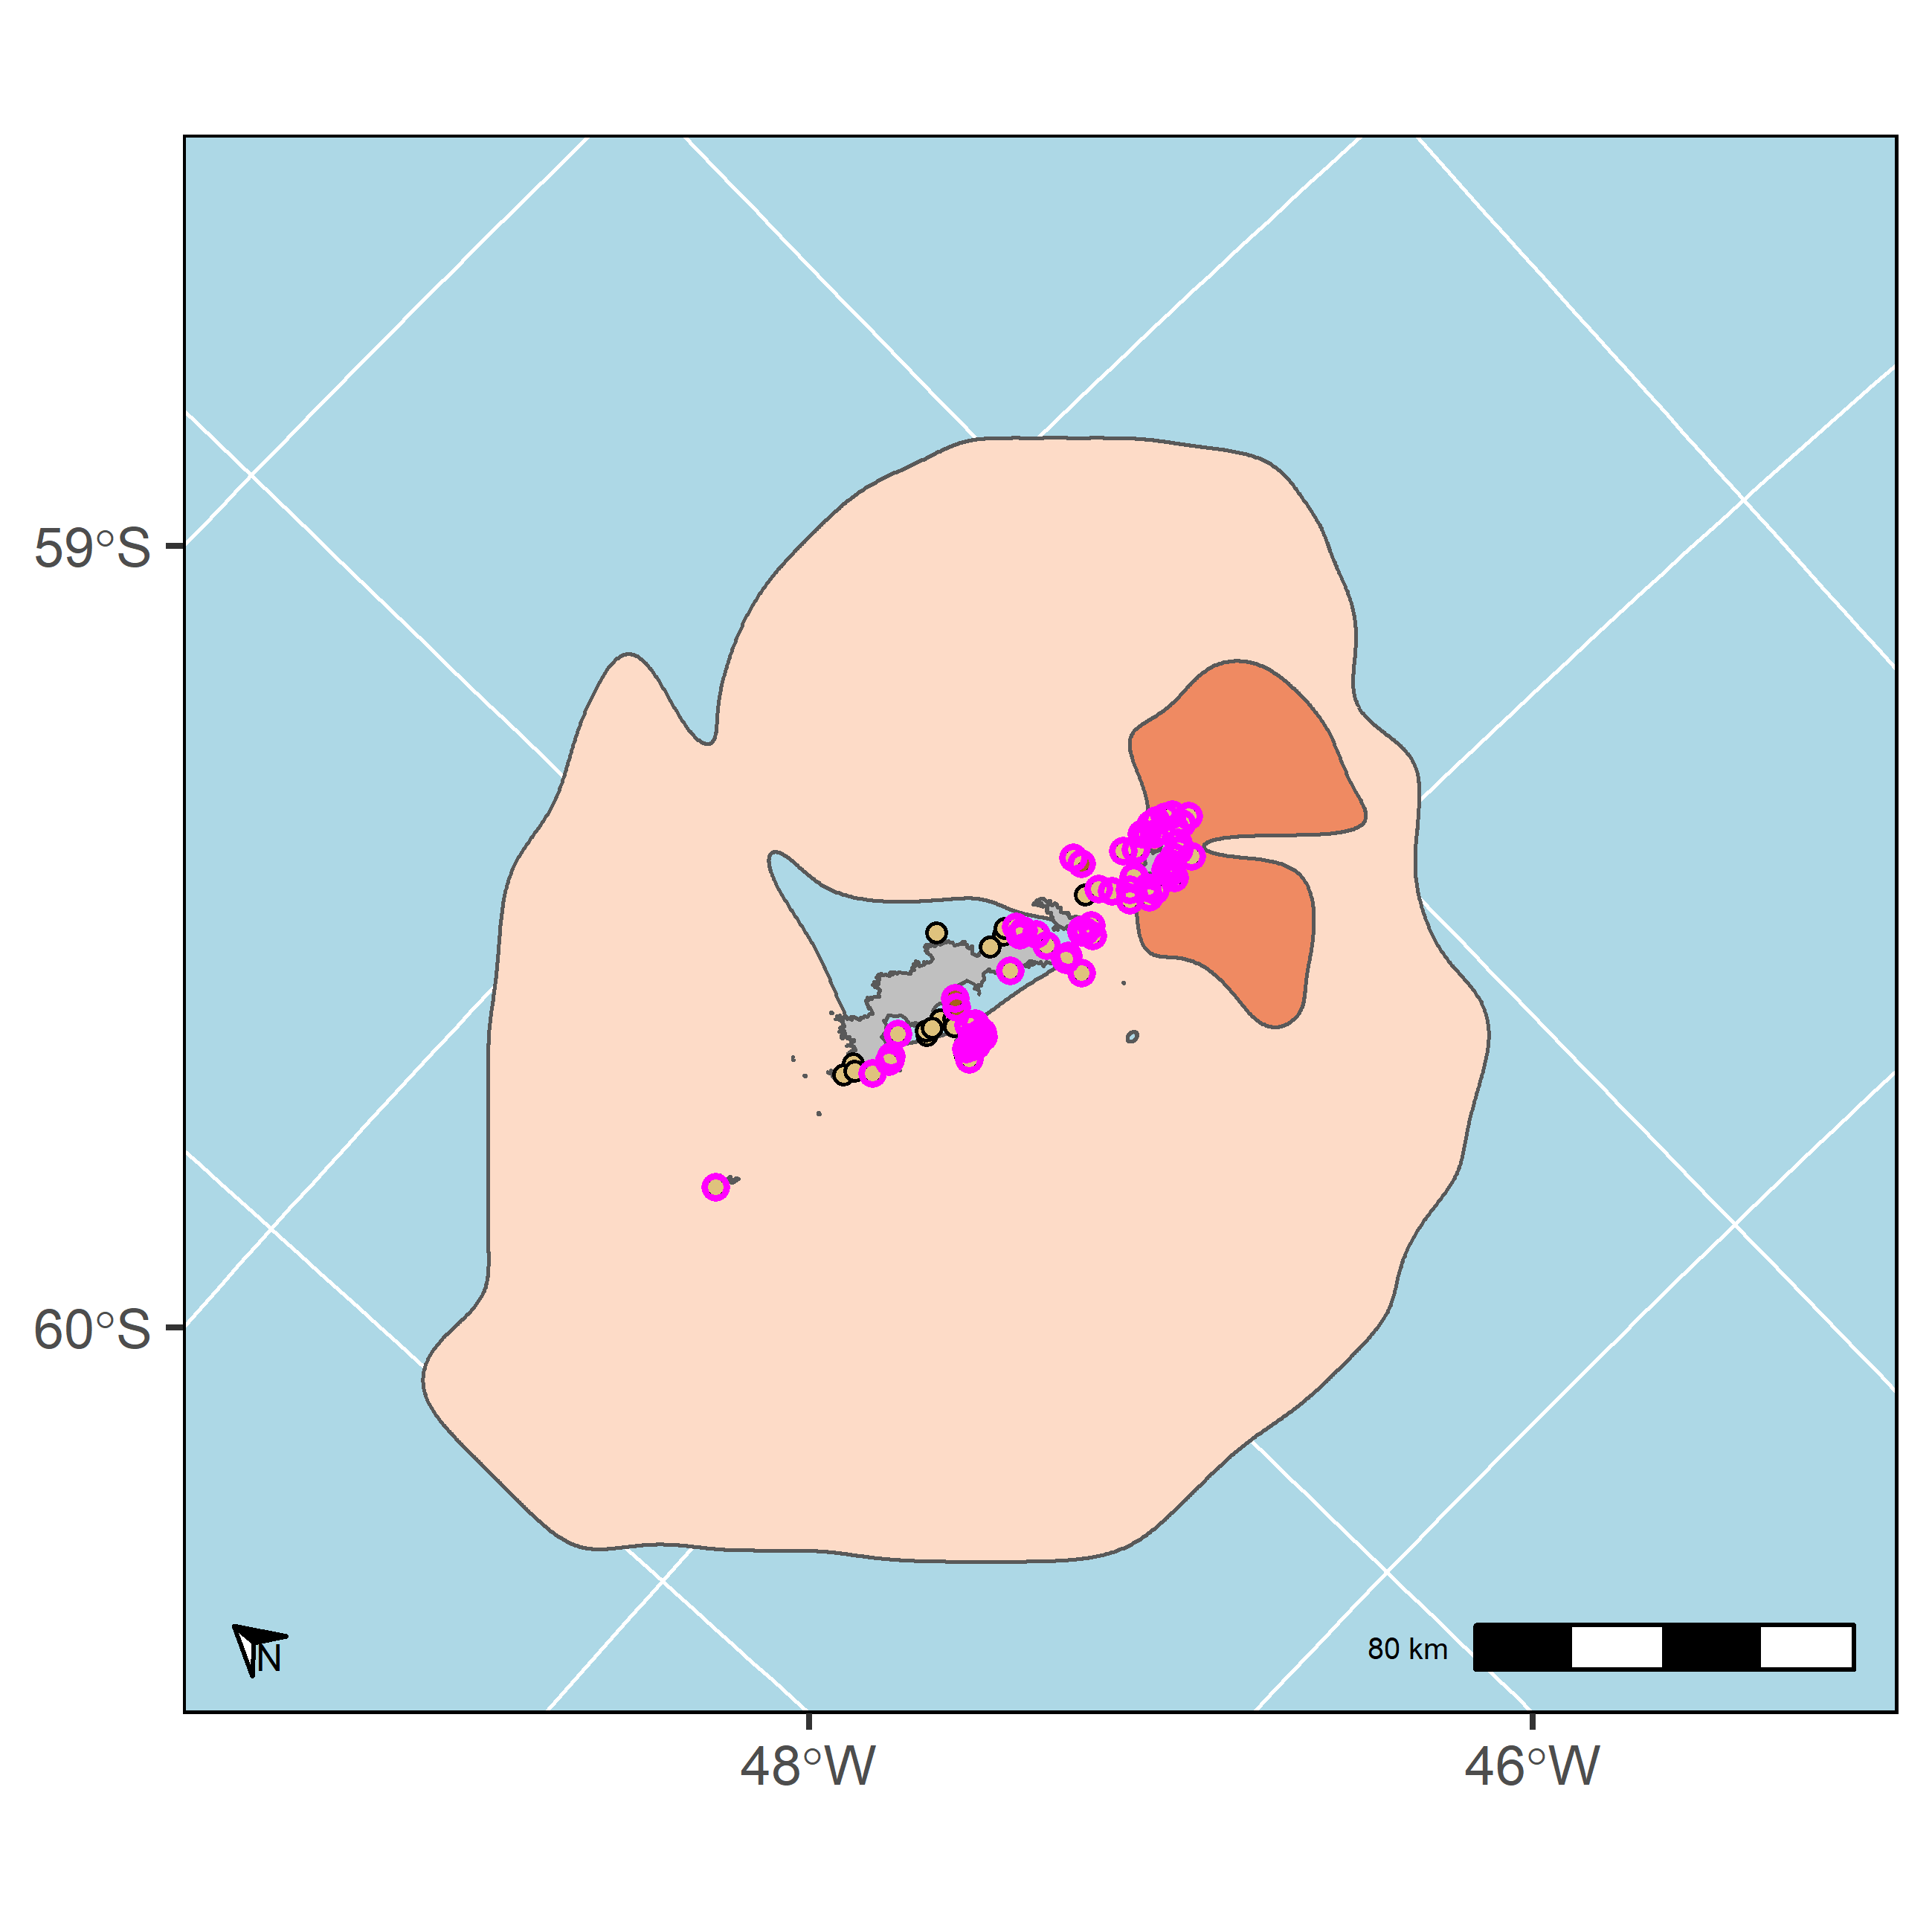


Figure A18.1: Focal Antarctica marine IBA 18 (orange polygon) for penguins, and other marine IBAs (light orange) for penguins identified during the project. Colonies circled in purple are those whose populations contributed to the marine IBA triggering IBA criteria A4 (>1% of the global population). See Table A18.2.

Table A18.1: Population estimates and count types (those that triggered IBA Criteria A4, >1% of global population) for key penguin species in Antarctic marine IBA 18. Key sources of colony input data associated with this marine IBA are detailed in Table A18.2. Population estimates refer to the lower and upper estimated number of adult breeding pairs likely to be using the marine IBA; derived from summing over all cells from individual colony density distribution surfaces which contributed to the identification of the marine IBA.

| Site code | Species | Count type | Lower | Upper |
| --- | --- | --- | --- | --- |
| 18 | ADP | max | 37900 | 132814 |
| 18 | ADP | median | 38402 | 93603 |
| 18 | ADP | recent | 37906 | 87570 |
| 18 | CHP | min | 34100 | 129978 |
| 18 | CHP | max | 34100 | 129978 |
| 18 | CHP | median | 34100 | 129978 |
| 18 | CHP | recent | 34100 | 129978 |

Table A18.2: Population estimates (adult breeding pairs) and count types from individual colony(ies) density distribution surfaces which contributed to the identification of marine IBA: 18. I.e. The lower and upper estimated number of adult breeding pairs from a given colony that may utilise the marine IBA. Note, the lower population estimate represents the lowest estimated number of breeding pairs from a given colony contributing to the delineation of the marine IBA site. The lower population estimate may therefore be zero when only part of the individual colony(ies) density distribution surface contributed to the marine IBA. *The Count Year for the median population estimate indicates the number of yearly population assessments for the given colony. Colony names are given in the ‘Colony Codes’ table at the end of this document.

| Site code | Species | Colony | Count type | Lower | Upper | Count year* |
| --- | --- | --- | --- | --- | --- | --- |
| 18 | ADP | ACUN | max | 1266 | 3079 | 2011 |
| 18 | ADP | ACUN | median | 808 | 1964 | 4 |
| 18 | ADP | ACUN | recent | 1266 | 3079 | 2011 |
| 18 | ADP | AMPH | max | 1655 | 4276 | 2011 |
| 18 | ADP | AMPH | median | 1368 | 3534 | 2 |
| 18 | ADP | AMPH | recent | 1655 | 4276 | 2011 |
| 18 | ADP | CHRI | max | 110 | 271 | 1983 |
| 18 | ADP | CHRI | median | 110 | 271 | 1 |
| 18 | ADP | CHRI | recent | 110 | 271 | 1983 |
| 18 | ADP | CORP | max | 40 | 122 | 1993 |
| 18 | ADP | CORP | median | 36 | 109 | 2 |
| 18 | ADP | CORP | recent | 31 | 96 | 2004 |
| 18 | ADP | FERR | max | 28329 | 61000 | 1983 |
| 18 | ADP | FERR | median | 17708 | 38130 | 3 |
| 18 | ADP | FERR | recent | 16653 | 35858 | 2004 |
| 18 | ADP | FITC | max | 1177 | 3000 | 1983 |
| 18 | ADP | GOPT | max | 671 | 2925 | 1978 |
| 18 | ADP | GOPT | median | 549 | 2393 | 2 |
| 18 | ADP | GOPT | recent | 427 | 1860 | 2011 |
| 18 | ADP | GOSL | max | 1290 | 2106 | 1984 |
| 18 | ADP | GOSL | median | 1290 | 2106 | 1 |
| 18 | ADP | GOSL | recent | 1290 | 2106 | 1984 |
| 18 | ADP | GRAP | max | 12219 | 30000 | 1983 |
| 18 | ADP | GRAP | median | 7535 | 18500 | 3 |
| 18 | ADP | GRAP | recent | 6639 | 16300 | 2004 |
| 18 | ADP | HANS | max | 1495 | 6209 | 2003 |
| 18 | ADP | HANS | median | 1081 | 4491 | 2 |
| 18 | ADP | HANS | recent | 668 | 2775 | 2012 |
| 18 | ADP | MART | max | 9401 | 26450 | 2004 |
| 18 | ADP | MART | median | 9198 | 25880 | 3 |
| 18 | ADP | MART | recent | 9401 | 26450 | 2004 |
| 18 | ADP | OUTE | max | 15 | 74 | 2011 |
| 18 | ADP | OUTE | median | 15 | 74 | 1 |
| 18 | ADP | OUTE | recent | 15 | 74 | 2011 |
| 18 | ADP | PAGE | max | 41 | 178 | 1978 |
| 18 | ADP | PAGE | median | 32 | 141 | 2 |
| 18 | ADP | PAGE | recent | 24 | 103 | 2011 |
| 18 | ADP | PANT | max | 1102 | 4801 | 1978 |
| 18 | ADP | PANT | median | 593 | 2586 | 2 |
| 18 | ADP | PANT | recent | 85 | 371 | 2011 |
| 18 | ADP | POWE | max | 10192 | 18286 | 1983 |
| 18 | ADP | POWE | median | 10192 | 18286 | 1 |
| 18 | ADP | POWE | recent | 10192 | 18286 | 1983 |
| 18 | ADP | SHIN | max | 372 | 1548 | 2004 |
| 18 | ADP | SHIN | median | 362 | 1509 | 2 |
| 18 | ADP | SHIN | recent | 353 | 1469 | 2007 |
| 18 | ADP | WEDD | max | 9176 | 18491 | 2011 |
| 18 | ADP | WEDD | median | 9176 | 18491 | 1 |
| 18 | ADP | WEDD | recent | 9176 | 18491 | 2011 |
| 18 | ADP | WPEC | max | 2055 | 3495 | 2011 |
| 18 | ADP | WPEC | median | 204 | 347 | 5 |
| 18 | ADP | WPEC | recent | 2055 | 3495 | 2011 |
| 18 | CHP | ACUN | min | 1737 | 4000 | 1983 |
| 18 | CHP | ACUN | max | 1737 | 4000 | 1983 |
| 18 | CHP | ACUN | median | 1737 | 4000 | 1 |
| 18 | CHP | ACUN | recent | 1737 | 4000 | 1983 |
| 18 | CHP | AILS | min | 2752 | 6000 | 1983 |
| 18 | CHP | AILS | max | 2752 | 6000 | 1983 |
| 18 | CHP | AILS | median | 2752 | 6000 | 1 |
| 18 | CHP | AILS | recent | 2752 | 6000 | 1983 |
| 18 | CHP | AITK | min | 1465 | 3300 | 1983 |
| 18 | CHP | AITK | max | 1465 | 3300 | 1983 |
| 18 | CHP | AITK | median | 1465 | 3300 | 1 |
| 18 | CHP | AITK | recent | 1465 | 3300 | 1983 |
| 18 | CHP | AMPH | min | 1053 | 2315 | 1983 |
| 18 | CHP | AMPH | max | 1053 | 2315 | 1983 |
| 18 | CHP | AMPH | median | 1053 | 2315 | 1 |
| 18 | CHP | AMPH | recent | 1053 | 2315 | 1983 |
| 18 | CHP | ANDE | min | 43 | 100 | 1983 |
| 18 | CHP | ANDE | max | 43 | 100 | 1983 |
| 18 | CHP | ANDE | median | 43 | 100 | 1 |
| 18 | CHP | ANDE | recent | 43 | 100 | 1983 |
| 18 | CHP | BUCH | min | 3277 | 6500 | 1983 |
| 18 | CHP | BUCH | max | 3277 | 6500 | 1983 |
| 18 | CHP | BUCH | median | 3277 | 6500 | 1 |
| 18 | CHP | BUCH | recent | 3277 | 6500 | 1983 |
| 18 | CHP | CHEA | min | 2578 | 4642 | 1984 |
| 18 | CHP | CHEA | max | 2578 | 4642 | 1984 |
| 18 | CHP | CHEA | median | 2578 | 4642 | 1 |
| 18 | CHP | CHEA | recent | 2578 | 4642 | 1984 |
| 18 | CHP | COFF | min | 672 | 1455 | 1983 |
| 18 | CHP | COFF | max | 672 | 1455 | 1983 |
| 18 | CHP | COFF | median | 672 | 1455 | 1 |
| 18 | CHP | COFF | recent | 672 | 1455 | 1983 |
| 18 | CHP | CONF | min | 1343 | 3973 | 1979 |
| 18 | CHP | CONF | max | 1343 | 3973 | 1979 |
| 18 | CHP | CONF | median | 1343 | 3973 | 1 |
| 18 | CHP | CONF | recent | 1343 | 3973 | 1979 |
| 18 | CHP | CROB | min | 12211 | 22982 | 1983 |
| 18 | CHP | CROB | max | 12211 | 22982 | 1983 |
| 18 | CHP | CROB | median | 12211 | 22982 | 1 |
| 18 | CHP | CROB | recent | 12211 | 22982 | 1983 |
| 18 | CHP | ECAP | min | 484 | 848 | 1983 |
| 18 | CHP | ECAP | max | 484 | 848 | 1983 |
| 18 | CHP | ECAP | median | 484 | 848 | 1 |
| 18 | CHP | ECAP | recent | 484 | 848 | 1983 |
| 18 | CHP | ELLI | min | 6949 | 13691 | 1983 |
| 18 | CHP | ELLI | max | 6949 | 13691 | 1983 |
| 18 | CHP | ELLI | median | 6949 | 13691 | 1 |
| 18 | CHP | ELLI | recent | 6949 | 13691 | 1983 |
| 18 | CHP | FERG | min | 3970 | 6858 | 1983 |
| 18 | CHP | FERG | max | 3970 | 6858 | 1983 |
| 18 | CHP | FERG | median | 3970 | 6858 | 1 |
| 18 | CHP | FERG | recent | 3970 | 6858 | 1983 |
| 18 | CHP | FERR | min | 6955 | 14200 | 1983 |
| 18 | CHP | FERR | max | 6955 | 14200 | 1983 |
| 18 | CHP | FERR | median | 6955 | 14200 | 1 |
| 18 | CHP | FERR | recent | 6955 | 14200 | 1983 |
| 18 | CHP | FITC | min | 507 | 1200 | 1983 |
| 18 | CHP | FITC | max | 507 | 1200 | 1983 |
| 18 | CHP | FITC | median | 507 | 1200 | 1 |
| 18 | CHP | FITC | recent | 507 | 1200 | 1983 |
| 18 | CHP | FLOR | min | 199 | 500 | 1983 |
| 18 | CHP | FLOR | max | 199 | 500 | 1983 |
| 18 | CHP | FLOR | median | 199 | 500 | 1 |
| 18 | CHP | FLOR | recent | 199 | 500 | 1983 |
| 18 | CHP | FRED | min | 19356 | 32176 | 1983 |
| 18 | CHP | FRED | max | 19356 | 32176 | 1983 |
| 18 | CHP | FRED | median | 19356 | 32176 | 1 |
| 18 | CHP | FRED | recent | 19356 | 32176 | 1983 |
| 18 | CHP | FYRC | min | 182 | 536 | 1979 |
| 18 | CHP | FYRC | max | 841 | 2480 | 1978 |
| 18 | CHP | FYRC | median | 512 | 1508 | 2 |
| 18 | CHP | FYRC | recent | 182 | 536 | 1979 |
| 18 | CHP | GEDD | min | 3159 | 4689 | 1983 |
| 18 | CHP | GEDD | max | 3159 | 4689 | 1983 |
| 18 | CHP | GEDD | median | 3159 | 4689 | 1 |
| 18 | CHP | GEDD | recent | 3159 | 4689 | 1983 |
| 18 | CHP | GIBA | min | 13 | 32 | 1983 |
| 18 | CHP | GIBA | max | 13 | 32 | 1983 |
| 18 | CHP | GIBA | median | 13 | 32 | 1 |
| 18 | CHP | GIBA | recent | 13 | 32 | 1983 |
| 18 | CHP | GOPT | min | 2121 | 6521 | 1978 |
| 18 | CHP | GOPT | max | 2121 | 6521 | 1978 |
| 18 | CHP | GOPT | median | 2121 | 6521 | 1 |
| 18 | CHP | GOPT | recent | 2121 | 6521 | 1978 |
| 18 | CHP | GOSL | min | 1878 | 2644 | 1984 |
| 18 | CHP | GOSL | max | 1878 | 2644 | 1984 |
| 18 | CHP | GOSL | median | 1878 | 2644 | 1 |
| 18 | CHP | GOSL | recent | 1878 | 2644 | 1984 |
| 18 | CHP | GOWC | min | 117 | 394 | 1984 |
| 18 | CHP | GOWC | max | 117 | 394 | 1984 |
| 18 | CHP | GOWC | median | 117 | 394 | 1 |
| 18 | CHP | GOWC | recent | 117 | 394 | 1984 |
| 18 | CHP | GREY | min | 1004 | 1722 | 1983 |
| 18 | CHP | GREY | max | 1004 | 1722 | 1983 |
| 18 | CHP | GREY | median | 1004 | 1722 | 1 |
| 18 | CHP | GREY | recent | 1004 | 1722 | 1983 |
| 18 | CHP | INAC | min | 0 | 96 | 1986 |
| 18 | CHP | INAC | max | 0 | 96 | 1986 |
| 18 | CHP | INAC | median | 0 | 96 | 1 |
| 18 | CHP | INAC | recent | 0 | 96 | 1986 |
| 18 | CHP | LOPT | min | 482 | 746 | 2004 |
| 18 | CHP | LOPT | max | 482 | 746 | 2004 |
| 18 | CHP | LOPT | median | 482 | 746 | 1 |
| 18 | CHP | LOPT | recent | 482 | 746 | 2004 |
| 18 | CHP | MABE | min | 210 | 248 | 1983 |
| 18 | CHP | MABE | max | 210 | 248 | 1983 |
| 18 | CHP | MABE | median | 210 | 248 | 1 |
| 18 | CHP | MABE | recent | 210 | 248 | 1983 |
| 18 | CHP | MACO | min | 1874 | 3800 | 1983 |
| 18 | CHP | MACO | max | 1874 | 3800 | 1983 |
| 18 | CHP | MACO | median | 1874 | 3800 | 1 |
| 18 | CHP | MACO | recent | 1874 | 3800 | 1983 |
| 18 | CHP | MARI | min | 1453 | 1462 | 1978 |
| 18 | CHP | MARI | max | 1453 | 1462 | 1978 |
| 18 | CHP | MARI | median | 1453 | 1462 | 1 |
| 18 | CHP | MARI | recent | 1453 | 1462 | 1978 |
| 18 | CHP | MARR | min | 5868 | 9307 | 1983 |
| 18 | CHP | MARR | max | 5868 | 9307 | 1983 |
| 18 | CHP | MARR | median | 5868 | 9307 | 1 |
| 18 | CHP | MARR | recent | 5868 | 9307 | 1983 |
| 18 | CHP | MART | min | 3902 | 10000 | 1983 |
| 18 | CHP | MART | max | 3902 | 10000 | 1983 |
| 18 | CHP | MART | median | 3902 | 10000 | 1 |
| 18 | CHP | MART | recent | 3902 | 10000 | 1983 |
| 18 | CHP | MATH | min | 4132 | 9889 | 1983 |
| 18 | CHP | MATH | max | 4132 | 9889 | 1983 |
| 18 | CHP | MATH | median | 4132 | 9889 | 1 |
| 18 | CHP | MATH | recent | 4132 | 9889 | 1983 |
| 18 | CHP | MEPT | min | 223 | 751 | 2013 |
| 18 | CHP | MEPT | max | 223 | 751 | 2013 |
| 18 | CHP | MEPT | median | 223 | 751 | 1 |
| 18 | CHP | MEPT | recent | 223 | 751 | 2013 |
| 18 | CHP | METH | min | 946 | 2100 | 1983 |
| 18 | CHP | METH | max | 946 | 2100 | 1983 |
| 18 | CHP | METH | median | 946 | 2100 | 1 |
| 18 | CHP | METH | recent | 946 | 2100 | 1983 |
| 18 | CHP | MICH | min | 1592 | 2683 | 1983 |
| 18 | CHP | MICH | max | 1592 | 2683 | 1983 |
| 18 | CHP | MICH | median | 1592 | 2683 | 1 |
| 18 | CHP | MICH | recent | 1592 | 2683 | 1983 |
| 18 | CHP | MICV | min | 367 | 886 | 2004 |
| 18 | CHP | MICV | max | 367 | 886 | 2004 |
| 18 | CHP | MICV | median | 367 | 886 | 1 |
| 18 | CHP | MICV | recent | 367 | 886 | 2004 |
| 18 | CHP | MLGE | min | 156 | 297 | 1978 |
| 18 | CHP | MLGE | max | 156 | 297 | 1978 |
| 18 | CHP | MLGE | median | 156 | 297 | 1 |
| 18 | CHP | MLGE | recent | 156 | 297 | 1978 |
| 18 | CHP | MLGW | min | 259 | 838 | 1979 |
| 18 | CHP | MLGW | max | 259 | 838 | 1979 |
| 18 | CHP | MLGW | median | 259 | 838 | 1 |
| 18 | CHP | MLGW | recent | 259 | 838 | 1979 |
| 18 | CHP | MOSS | min | 278 | 600 | 1983 |
| 18 | CHP | MOSS | max | 278 | 600 | 1983 |
| 18 | CHP | MOSS | median | 278 | 600 | 1 |
| 18 | CHP | MOSS | recent | 278 | 600 | 1983 |
| 18 | CHP | MOYE | min | 1159 | 2204 | 1979 |
| 18 | CHP | MOYE | max | 1159 | 2204 | 1979 |
| 18 | CHP | MOYE | median | 1159 | 2204 | 1 |
| 18 | CHP | MOYE | recent | 1159 | 2204 | 1979 |
| 18 | CHP | MURR | min | 522 | 993 | 1983 |
| 18 | CHP | MURR | max | 522 | 993 | 1983 |
| 18 | CHP | MURR | median | 522 | 993 | 1 |
| 18 | CHP | MURR | recent | 522 | 993 | 1983 |
| 18 | CHP | NORW | min | 35 | 44 | 1984 |
| 18 | CHP | NORW | max | 35 | 44 | 1984 |
| 18 | CHP | NORW | median | 35 | 44 | 1 |
| 18 | CHP | NORW | recent | 35 | 44 | 1984 |
| 18 | CHP | OLIC | min | 45 | 53 | 1979 |
| 18 | CHP | OLIC | max | 45 | 53 | 1979 |
| 18 | CHP | OLIC | median | 45 | 53 | 1 |
| 18 | CHP | OLIC | recent | 45 | 53 | 1979 |
| 18 | CHP | OLII | min | 1583 | 1873 | 1979 |
| 18 | CHP | OLII | max | 1583 | 1873 | 1979 |
| 18 | CHP | OLII | median | 1583 | 1873 | 1 |
| 18 | CHP | OLII | recent | 1583 | 1873 | 1979 |
| 18 | CHP | PAGE | min | 195 | 600 | 1978 |
| 18 | CHP | PAGE | max | 195 | 600 | 1978 |
| 18 | CHP | PAGE | median | 195 | 600 | 1 |
| 18 | CHP | PAGE | recent | 195 | 600 | 1978 |
| 18 | CHP | PAND | min | 627 | 901 | 2009 |
| 18 | CHP | PAND | max | 3820 | 5491 | 2009 |
| 18 | CHP | PAND | median | 2224 | 3196 | 2 |
| 18 | CHP | PAND | recent | 3820 | 5491 | 2009 |
| 18 | CHP | PANT | min | 868 | 2667 | 1978 |
| 18 | CHP | PANT | max | 868 | 2667 | 1978 |
| 18 | CHP | PANT | median | 868 | 2667 | 1 |
| 18 | CHP | PANT | recent | 868 | 2667 | 1978 |
| 18 | CHP | PIRI | min | 8165 | 16930 | 1983 |
| 18 | CHP | PIRI | max | 8165 | 16930 | 1983 |
| 18 | CHP | PIRI | median | 8165 | 16930 | 1 |
| 18 | CHP | PIRI | recent | 8165 | 16930 | 1983 |
| 18 | CHP | POWE | min | 3327 | 5587 | 1983 |
| 18 | CHP | POWE | max | 3327 | 5587 | 1983 |
| 18 | CHP | POWE | median | 3327 | 5587 | 1 |
| 18 | CHP | POWE | recent | 3327 | 5587 | 1983 |
| 18 | CHP | PRAE | min | 172 | 400 | 1983 |
| 18 | CHP | PRAE | max | 172 | 400 | 1983 |
| 18 | CHP | PRAE | median | 172 | 400 | 1 |
| 18 | CHP | PRAE | recent | 172 | 400 | 1983 |
| 18 | CHP | PTCT | min | 4 | 11 | 2004 |
| 18 | CHP | PTCT | max | 4 | 11 | 2004 |
| 18 | CHP | PTCT | median | 4 | 11 | 1 |
| 18 | CHP | PTCT | recent | 4 | 11 | 2004 |
| 18 | CHP | PTLA | min | 483 | 747 | 2004 |
| 18 | CHP | PTLA | max | 483 | 747 | 2004 |
| 18 | CHP | PTLA | median | 483 | 747 | 1 |
| 18 | CHP | PTLA | recent | 483 | 747 | 2004 |
| 18 | CHP | RAYN | min | 2549 | 5458 | 1983 |
| 18 | CHP | RAYN | max | 2549 | 5458 | 1983 |
| 18 | CHP | RAYN | median | 2549 | 5458 | 1 |
| 18 | CHP | RAYN | recent | 2549 | 5458 | 1983 |
| 18 | CHP | ROCA | min | 1926 | 3676 | 1983 |
| 18 | CHP | ROCA | max | 1926 | 3676 | 1983 |
| 18 | CHP | ROCA | median | 1926 | 3676 | 1 |
| 18 | CHP | ROCA | recent | 1926 | 3676 | 1983 |
| 18 | CHP | RUDM | min | 2652 | 3857 | 1983 |
| 18 | CHP | RUDM | max | 2652 | 3857 | 1983 |
| 18 | CHP | RUDM | median | 2652 | 3857 | 1 |
| 18 | CHP | RUDM | recent | 2652 | 3857 | 1983 |
| 18 | CHP | SADD | min | 17559 | 18323 | 1903 |
| 18 | CHP | SADD | max | 17559 | 18323 | 1903 |
| 18 | CHP | SADD | median | 17559 | 18323 | 1 |
| 18 | CHP | SADD | recent | 17559 | 18323 | 1903 |
| 18 | CHP | SHAG | min | 918 | 1661 | 1978 |
| 18 | CHP | SHAG | max | 918 | 1661 | 1978 |
| 18 | CHP | SHAG | median | 918 | 1661 | 1 |
| 18 | CHP | SHAG | recent | 918 | 1661 | 1978 |
| 18 | CHP | SHCV | min | 53 | 114 | 1994 |
| 18 | CHP | SHCV | max | 53 | 114 | 1994 |
| 18 | CHP | SHCV | median | 53 | 114 | 1 |
| 18 | CHP | SHCV | recent | 53 | 114 | 1994 |
| 18 | CHP | SKIL | min | 2849 | 4536 | 1983 |
| 18 | CHP | SKIL | max | 2849 | 4536 | 1983 |
| 18 | CHP | SKIL | median | 2849 | 4536 | 1 |
| 18 | CHP | SKIL | recent | 2849 | 4536 | 1983 |
| 18 | CHP | SMAT | min | 3188 | 7620 | 1983 |
| 18 | CHP | SMAT | max | 3188 | 7620 | 1983 |
| 18 | CHP | SMAT | median | 3188 | 7620 | 1 |
| 18 | CHP | SMAT | recent | 3188 | 7620 | 1983 |
| 18 | CHP | SPUI | min | 307 | 634 | 1983 |
| 18 | CHP | SPUI | max | 307 | 634 | 1983 |
| 18 | CHP | SPUI | median | 307 | 634 | 1 |
| 18 | CHP | SPUI | recent | 307 | 634 | 1983 |
| 18 | CHP | STEE | min | 9 | 14 | 1983 |
| 18 | CHP | STEE | max | 9 | 14 | 1983 |
| 18 | CHP | STEE | median | 9 | 14 | 1 |
| 18 | CHP | STEE | recent | 9 | 14 | 1983 |
| 18 | CHP | TTUR | min | 1039 | 2139 | 1983 |
| 18 | CHP | TTUR | max | 1039 | 2139 | 1983 |
| 18 | CHP | TTUR | median | 1039 | 2139 | 1 |
| 18 | CHP | TTUR | recent | 1039 | 2139 | 1983 |
| 18 | CHP | VAIS | min | 1401 | 4000 | 1983 |
| 18 | CHP | VAIS | max | 1401 | 4000 | 1983 |
| 18 | CHP | VAIS | median | 1401 | 4000 | 1 |
| 18 | CHP | VAIS | recent | 1401 | 4000 | 1983 |
| 18 | CHP | WHIT | min | 1780 | 4000 | 1947 |
| 18 | CHP | WHIT | max | 1780 | 4000 | 1947 |
| 18 | CHP | WHIT | median | 1780 | 4000 | 1 |
| 18 | CHP | WHIT | recent | 1780 | 4000 | 1947 |
| 18 | CHP | WPEC | min | 5242 | 8540 | 1983 |
| 18 | CHP | WPEC | max | 5242 | 8540 | 1983 |
| 18 | CHP | WPEC | median | 5242 | 8540 | 1 |
| 18 | CHP | WPEC | recent | 5242 | 8540 | 1983 |
| 18 | CHP | WPWC | min | 1531 | 2074 | 1983 |
| 18 | CHP | WPWC | max | 1531 | 2074 | 1983 |
| 18 | CHP | WPWC | median | 1531 | 2074 | 1 |
| 18 | CHP | WPWC | recent | 1531 | 2074 | 1983 |

# Antarctica marine IBA: 19

| Site code | 19 |
| --- | --- |
| Species | EMP |
| IBA criteria | A4: Congregations |
| Decimal Latitude | -74.359 |
| Decimal Longitude | -60.284 |
| Area (ha) | 80096.26 |
| Area (km2) | 800.9626 |
| MPA Overlap | WSMPA_P1 |
| MPA Type | Proposed |
| MPA Zones | WSMPA_P1 |


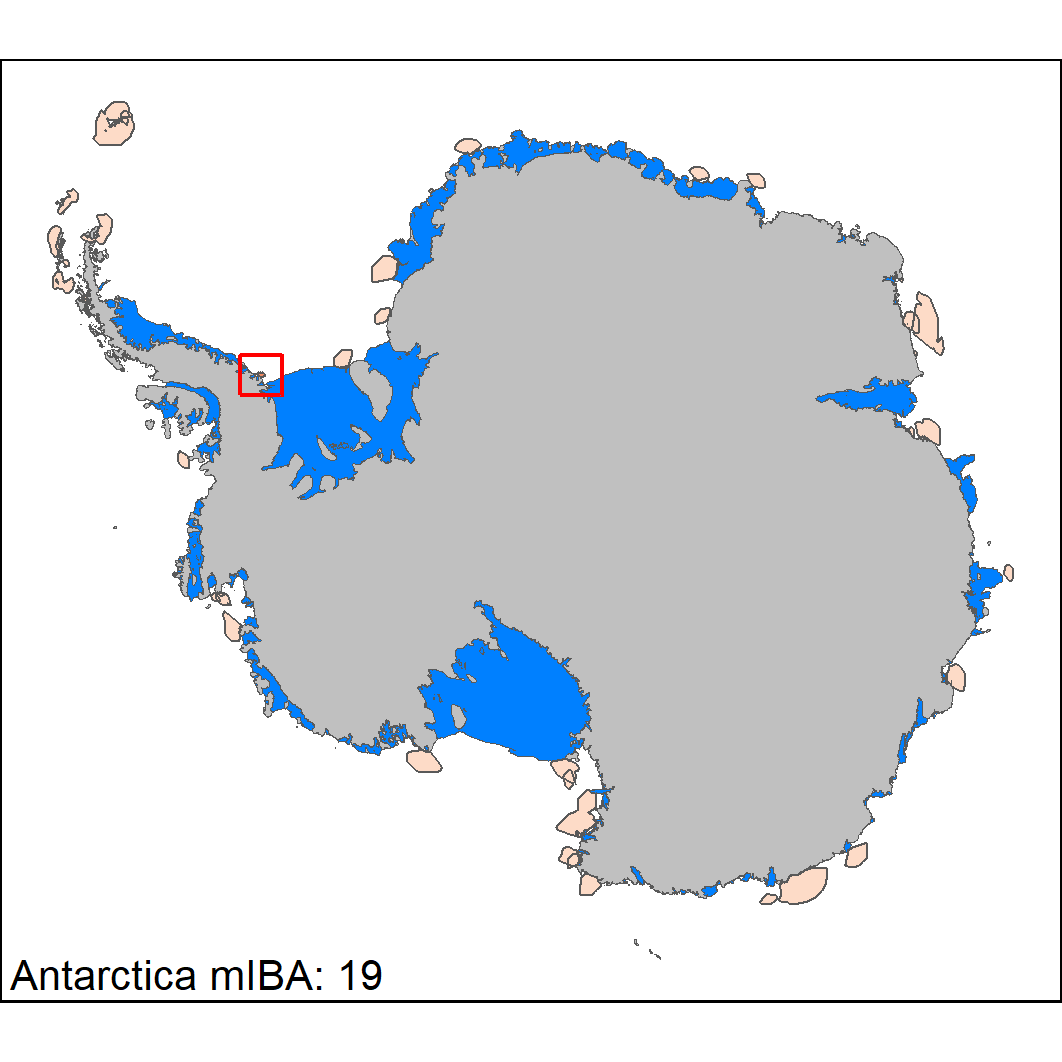


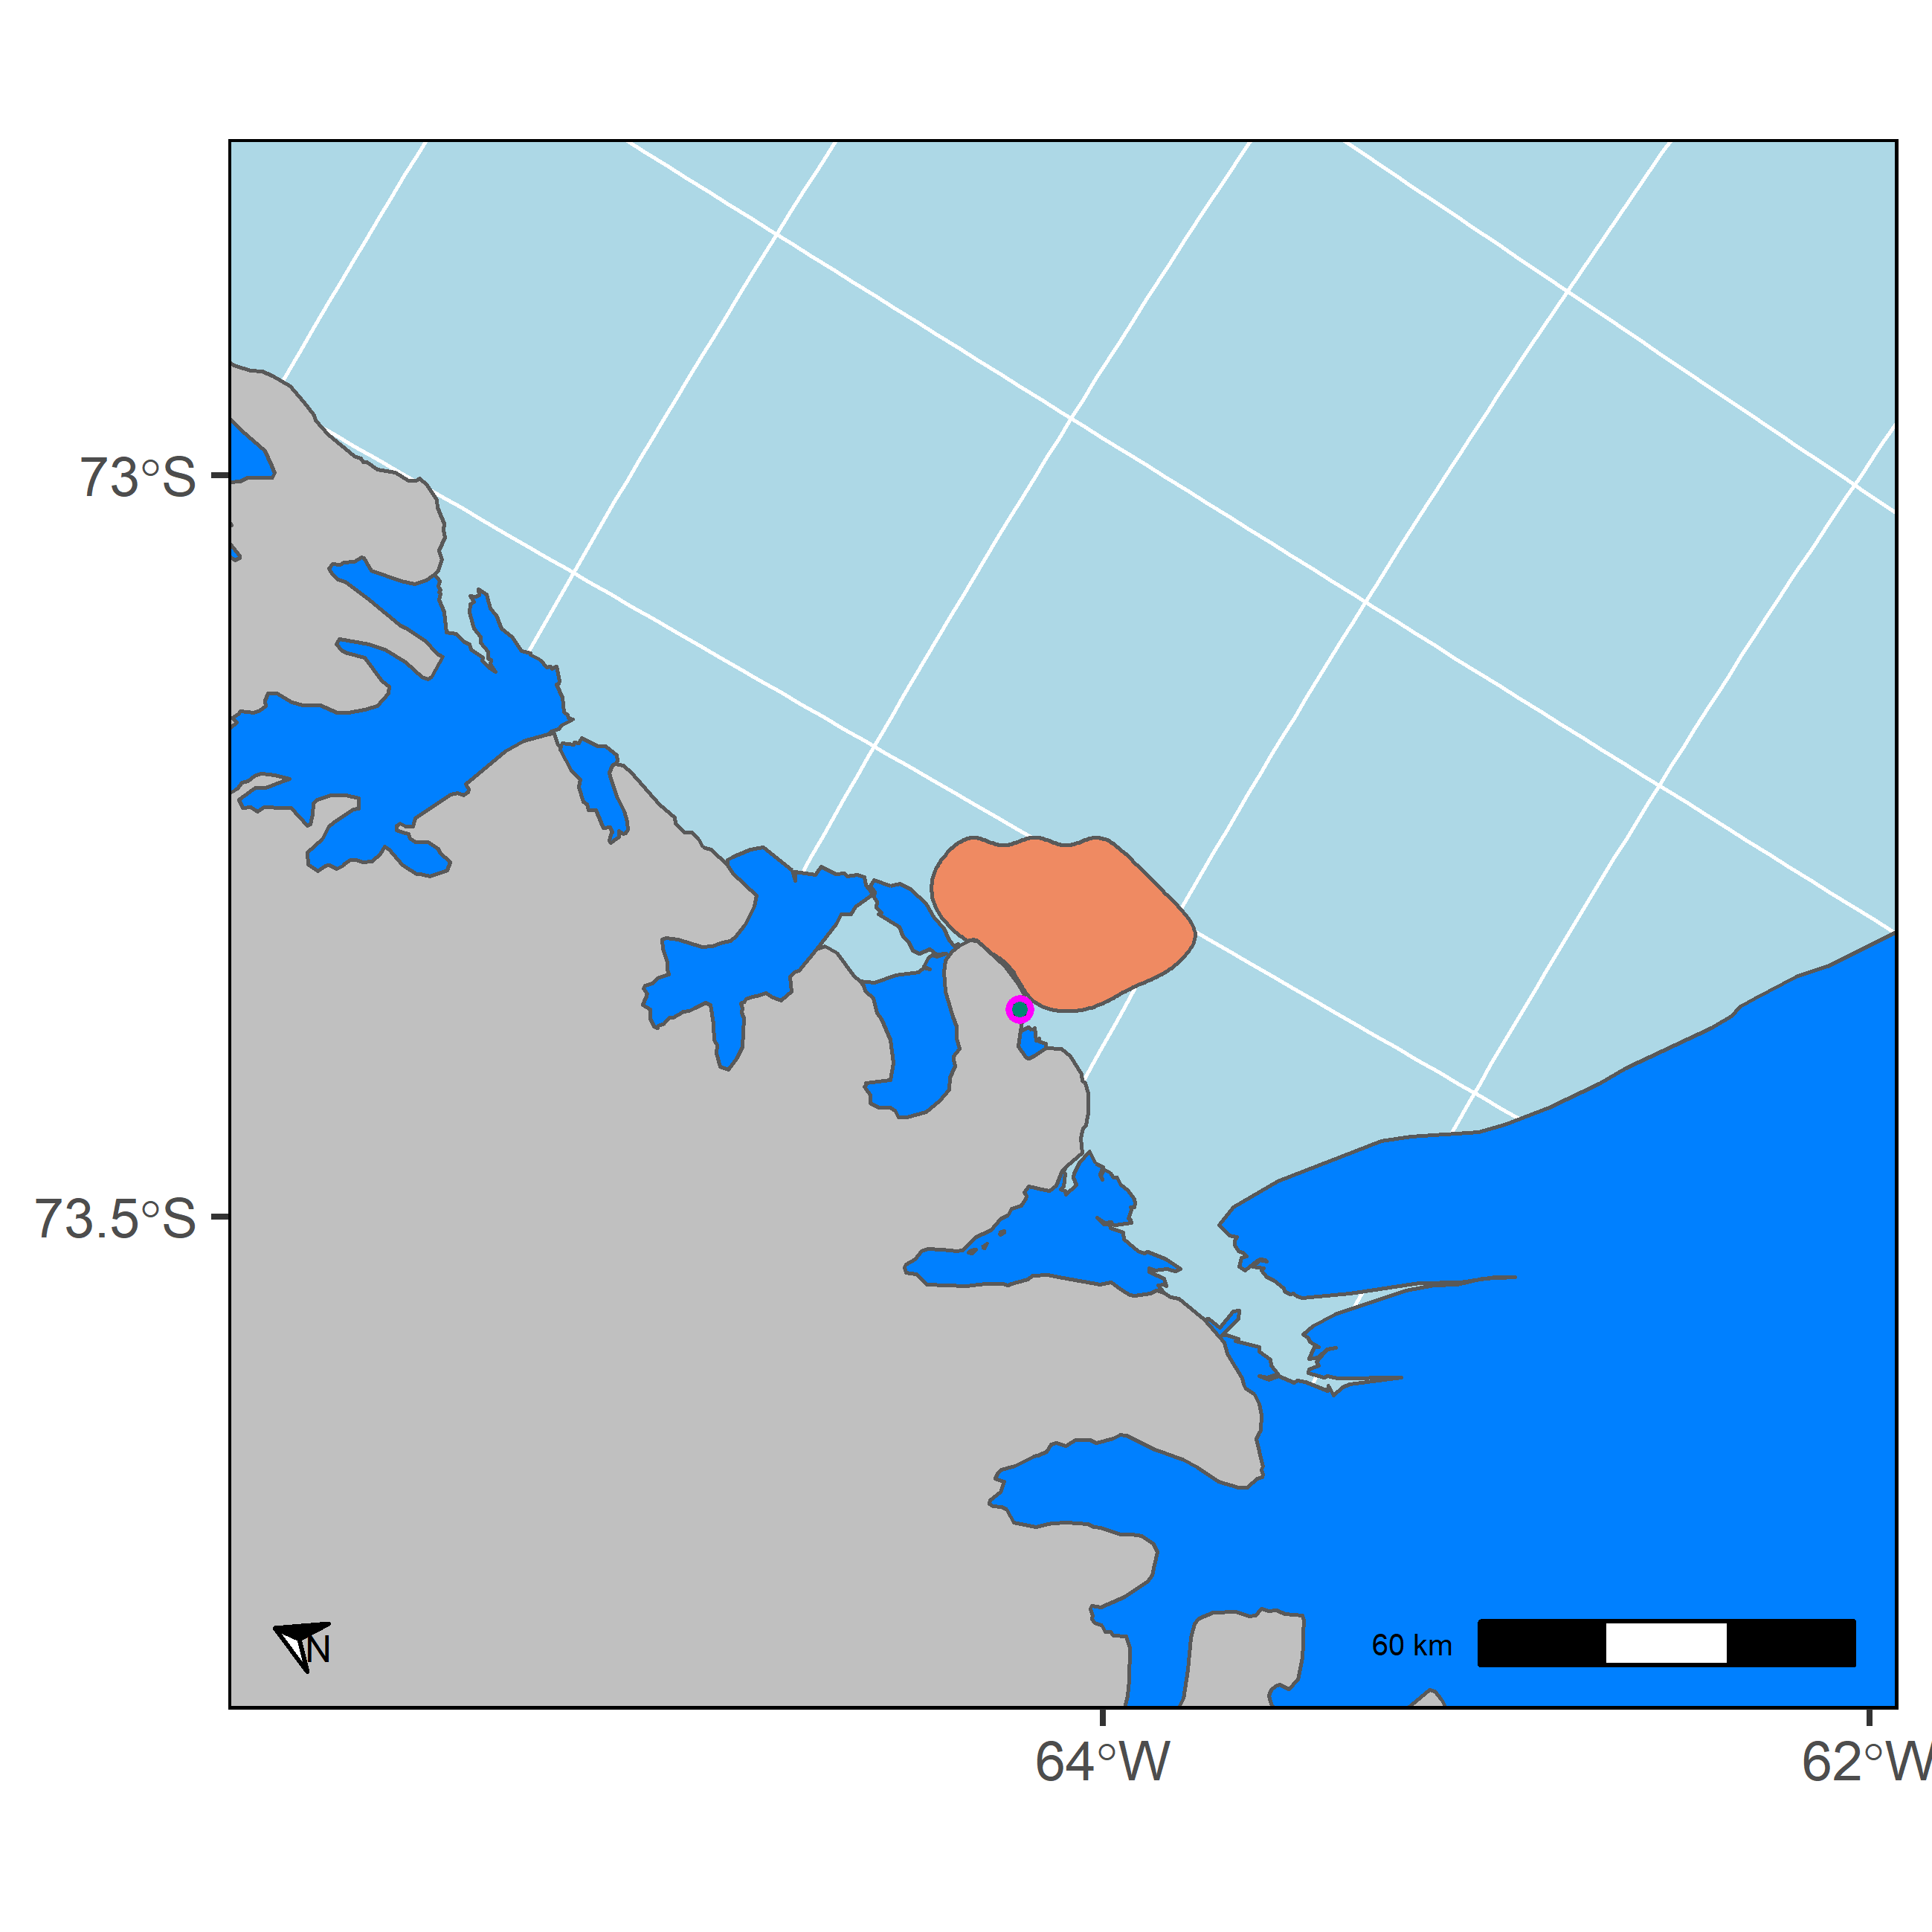


Figure A19.1: Focal Antarctica marine IBA 19 (orange polygon) for penguins, and other marine IBAs (light orange) for penguins identified during the project. Colonies circled in purple are those whose populations contributed to the marine IBA triggering IBA criteria A4 (>1% of the global population). See Table A19.2.

Table A19.1: Population estimates and count types (those that triggered IBA Criteria A4, >1% of global population) for key penguin species in Antarctic marine IBA 19. Key sources of colony input data associated with this marine IBA are detailed in Table A19.2. Population estimates refer to the lower and upper estimated number of adult breeding pairs likely to be using the marine IBA; derived from summing over all cells from individual colony density distribution surfaces which contributed to the identification of the marine IBA.

| Site code | Species | Count type | Lower | Upper |
| --- | --- | --- | --- | --- |
| 19 | EMP | min | 2579 | 4018 |
| 19 | EMP | max | 2579 | 4018 |
| 19 | EMP | median | 2579 | 4018 |
| 19 | EMP | recent | 2579 | 4018 |

Table A19.2: Population estimates (adult breeding pairs) and count types from individual colony(ies) density distribution surfaces which contributed to the identification of marine IBA: 19. I.e. The lower and upper estimated number of adult breeding pairs from a given colony that may utilise the marine IBA. Note, the lower population estimate represents the lowest estimated number of breeding pairs from a given colony contributing to the delineation of the marine IBA site. The lower population estimate may therefore be zero when only part of the individual colony(ies) density distribution surface contributed to the marine IBA. *The Count Year for the median population estimate indicates the number of yearly population assessments for the given colony. Colony names are given in the ‘Colony Codes’ table at the end of this document.

| Site code | Species | Colony | Count type | Lower | Upper | Count year* |
| --- | --- | --- | --- | --- | --- | --- |
| 19 | EMP | SMTH | min | 2579 | 4018 | 2009 |
| 19 | EMP | SMTH | max | 2579 | 4018 | 2009 |
| 19 | EMP | SMTH | median | 2579 | 4018 | 1 |
| 19 | EMP | SMTH | recent | 2579 | 4018 | 2009 |

# Antarctica marine IBA: 20

| Site code | 20 |
| --- | --- |
| Species | EMP |
| IBA criteria | A4: Congregations |
| Decimal Latitude | -77.3 |
| Decimal Longitude | -47.348 |
| Area (ha) | 821789.2 |
| Area (km2) | 8217.892 |
| MPA Overlap | WSMPA_P1 |
| MPA Type | Proposed |
| MPA Zones | WSMPA_P1 |


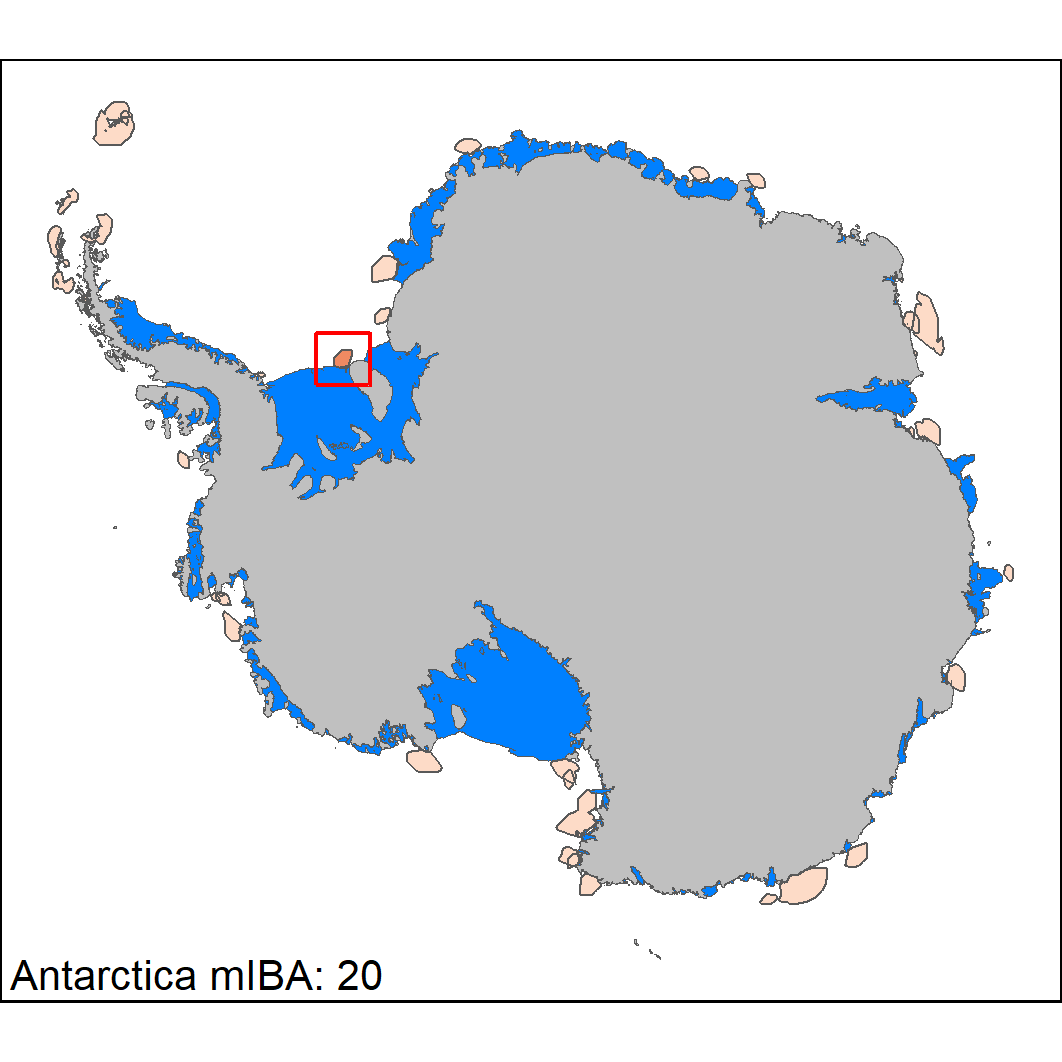


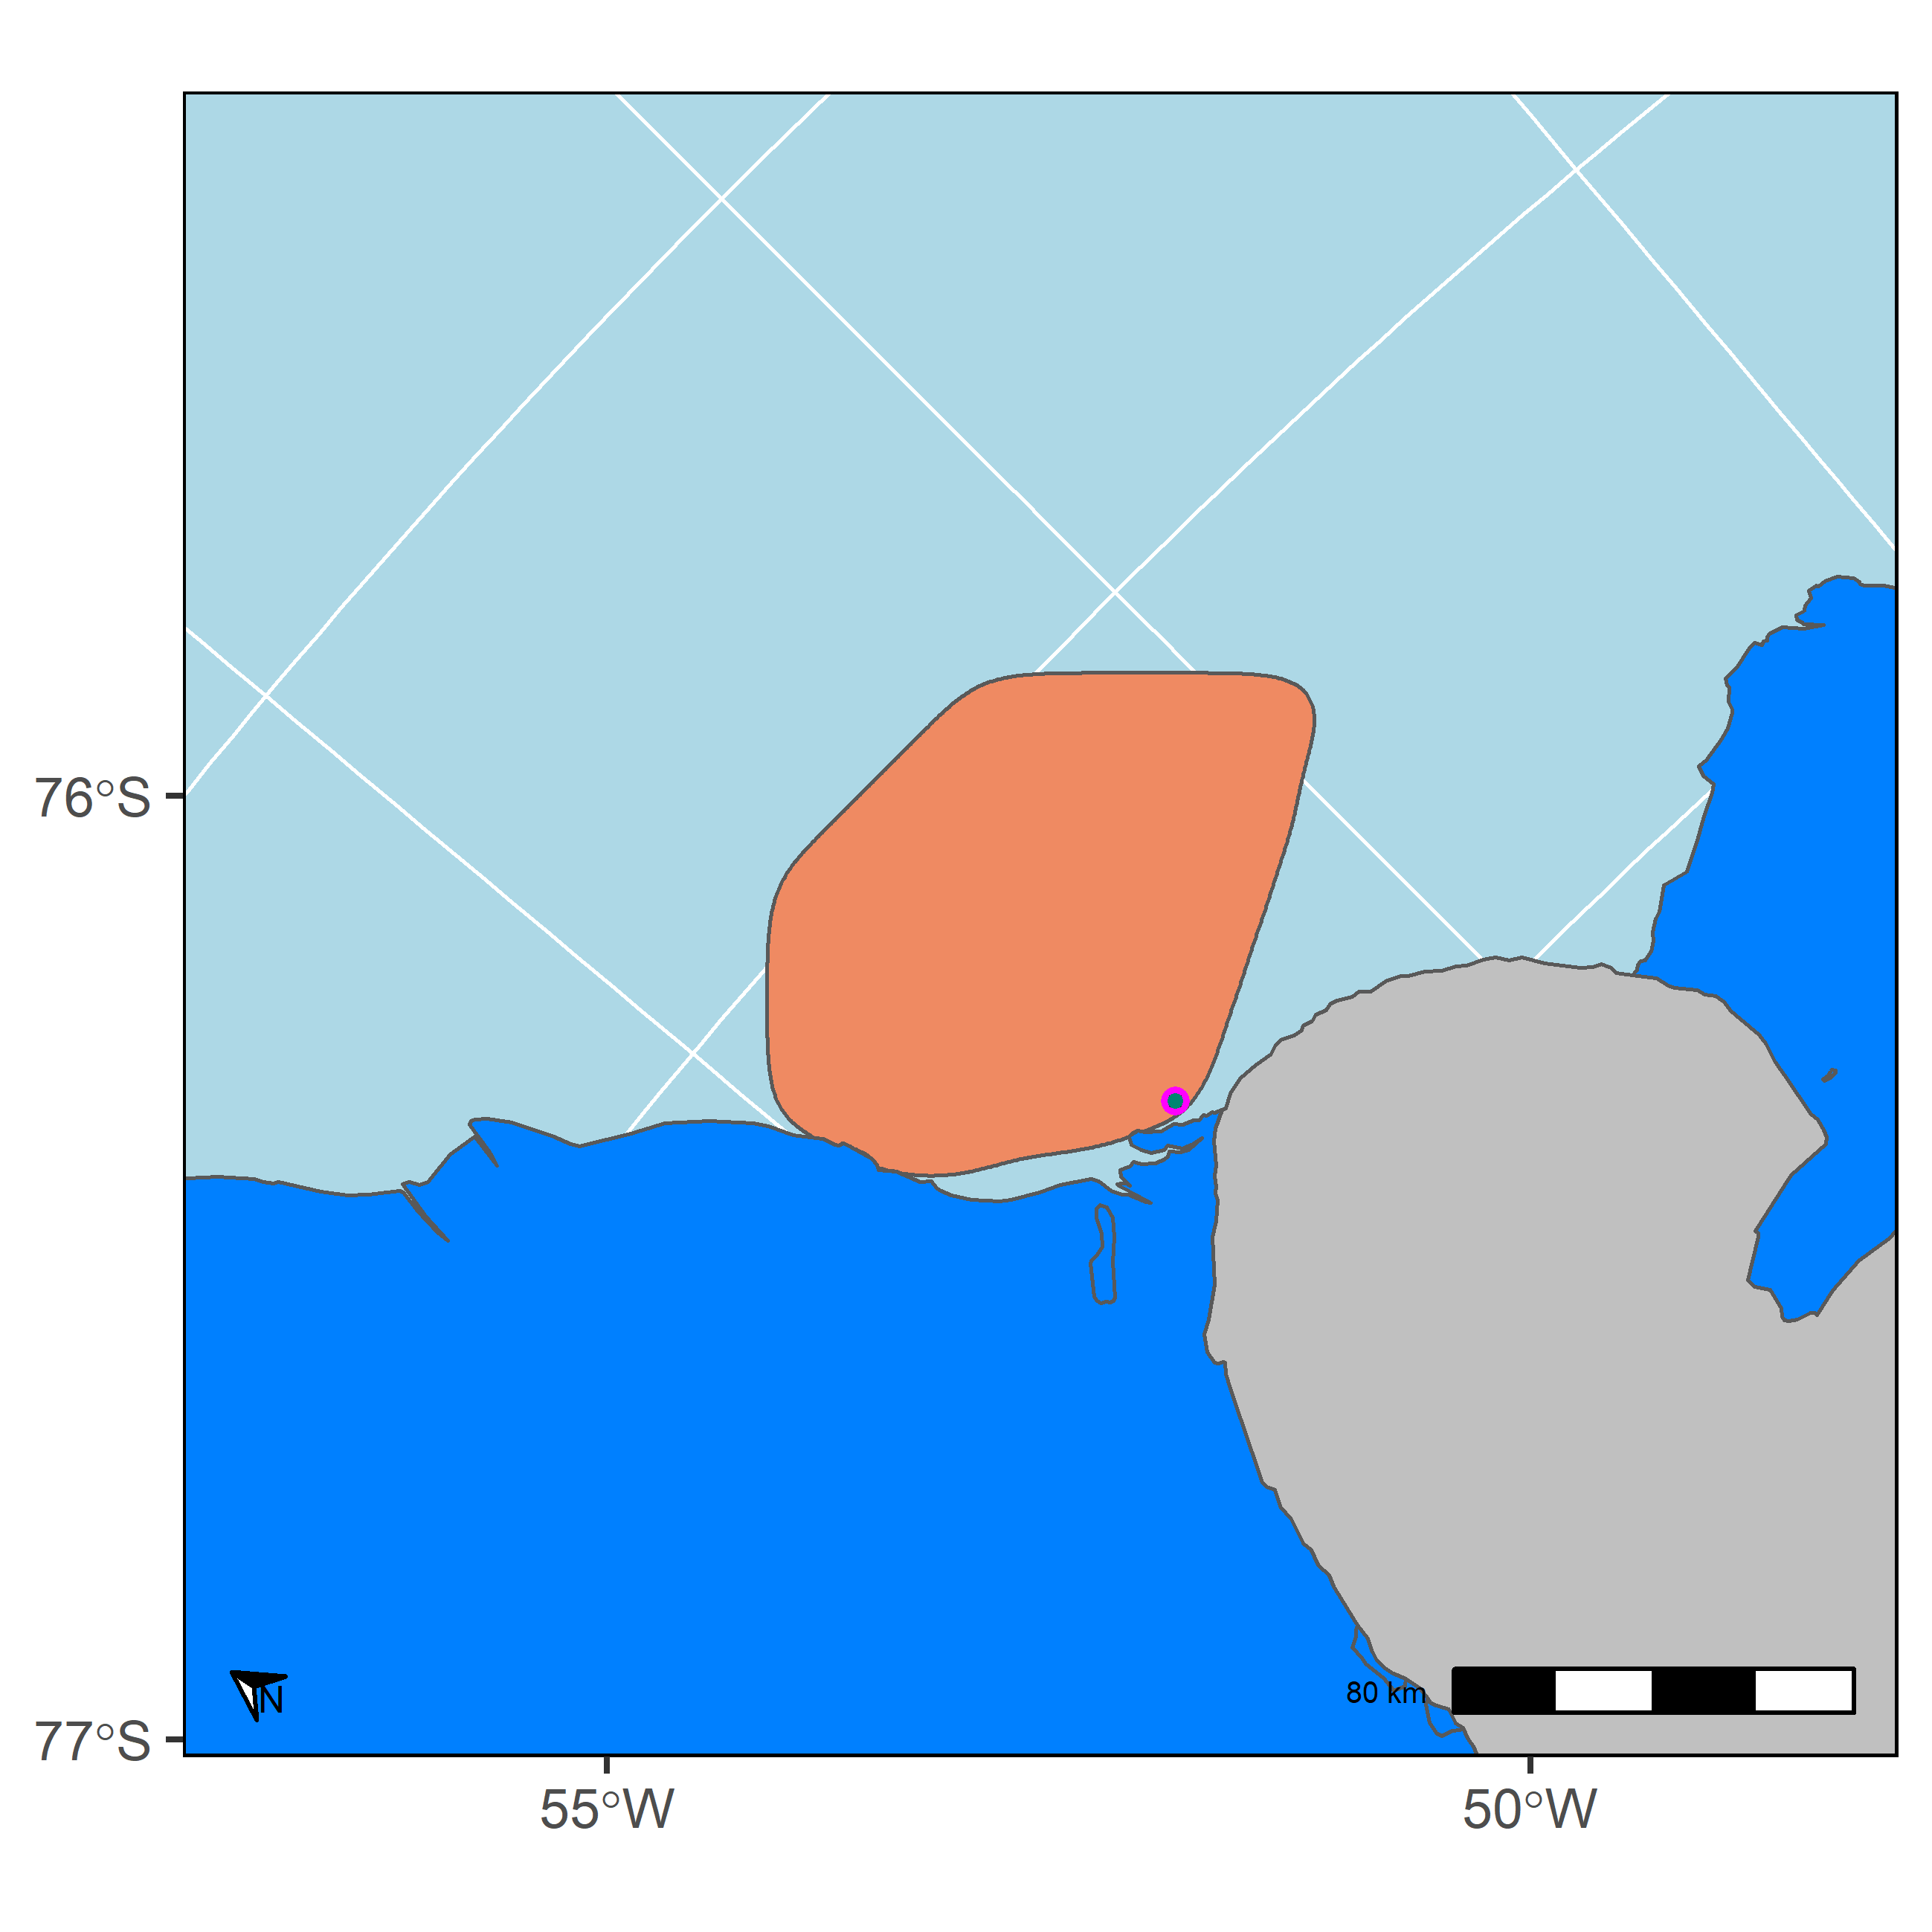


Figure A20.1: Focal Antarctica marine IBA 20 (orange polygon) for penguins, and other marine IBAs (light orange) for penguins identified during the project. Colonies circled in purple are those whose populations contributed to the marine IBA triggering IBA criteria A4 (>1% of the global population). See Table A20.2.

Table A20.1: Population estimates and count types (those that triggered IBA Criteria A4, >1% of global population) for key penguin species in Antarctic marine IBA 20. Key sources of colony input data associated with this marine IBA are detailed in Table A20.2. Population estimates refer to the lower and upper estimated number of adult breeding pairs likely to be using the marine IBA; derived from summing over all cells from individual colony density distribution surfaces which contributed to the identification of the marine IBA.

| Site code | Species | Count type | Lower | Upper |
| --- | --- | --- | --- | --- |
| 20 | EMP | min | 2600 | 8242 |
| 20 | EMP | max | 2600 | 8242 |
| 20 | EMP | median | 2600 | 8242 |
| 20 | EMP | recent | 2600 | 8242 |

Table A20.2: Population estimates (adult breeding pairs) and count types from individual colony(ies) density distribution surfaces which contributed to the identification of marine IBA: 20. I.e. The lower and upper estimated number of adult breeding pairs from a given colony that may utilise the marine IBA. Note, the lower population estimate represents the lowest estimated number of breeding pairs from a given colony contributing to the delineation of the marine IBA site. The lower population estimate may therefore be zero when only part of the individual colony(ies) density distribution surface contributed to the marine IBA. *The Count Year for the median population estimate indicates the number of yearly population assessments for the given colony. Colony names are given in the ‘Colony Codes’ table at the end of this document.

| Site code | Species | Colony | Count type | Lower | Upper | Count year* |
| --- | --- | --- | --- | --- | --- | --- |
| 20 | EMP | GOUL | min | 2600 | 8242 | 2009 |
| 20 | EMP | GOUL | max | 2600 | 8242 | 2009 |
| 20 | EMP | GOUL | median | 2600 | 8242 | 1 |
| 20 | EMP | GOUL | recent | 2600 | 8242 | 2009 |

# Antarctica marine IBA: 21

| Site code | 21 |
| --- | --- |
| Species | EMP |
| IBA criteria | A4: Congregations |
| Decimal Latitude | -76.937 |
| Decimal Longitude | -33.828 |
| Area (ha) | 580042.3 |
| Area (km2) | 5800.423 |
| MPA Overlap | WSMPA_P1 |
| MPA Type | Proposed |
| MPA Zones | WSMPA_P1 |


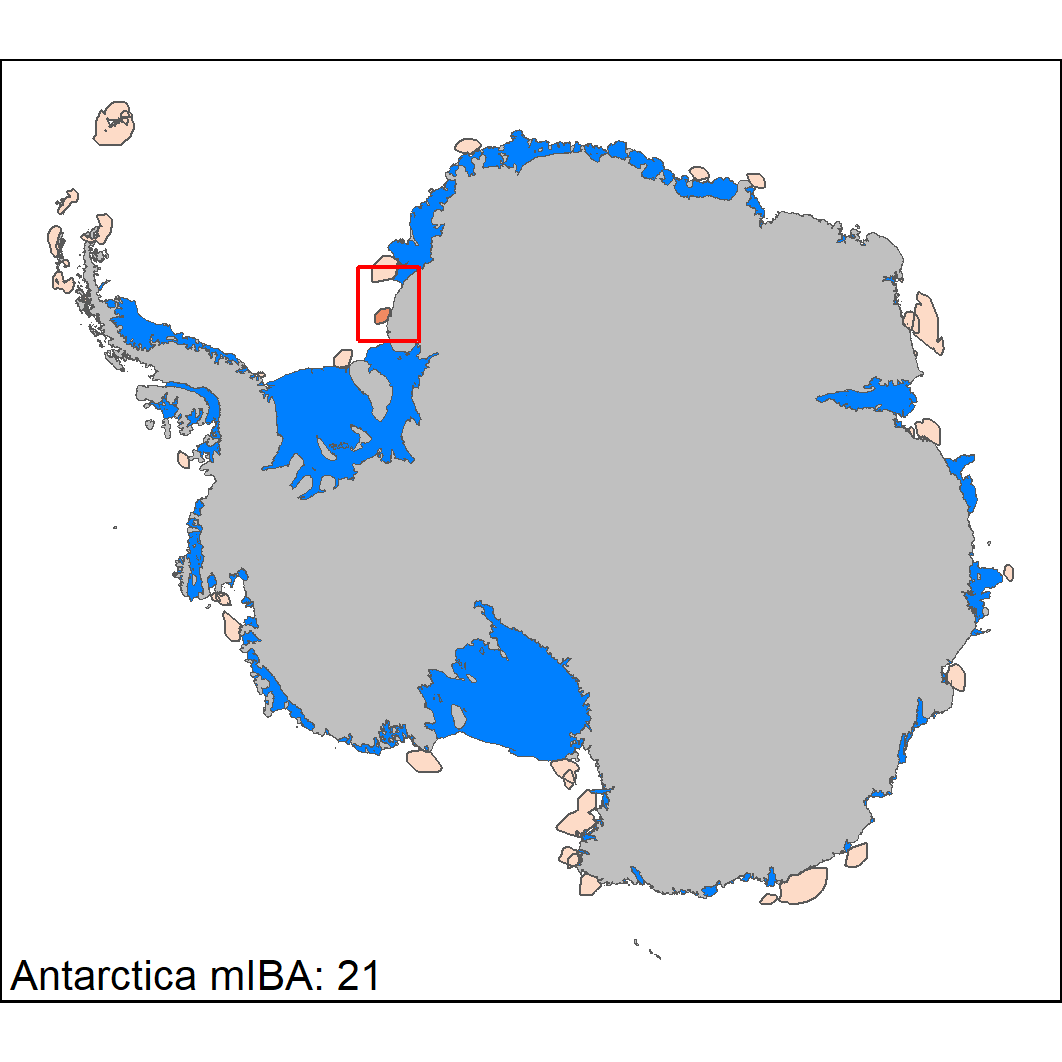


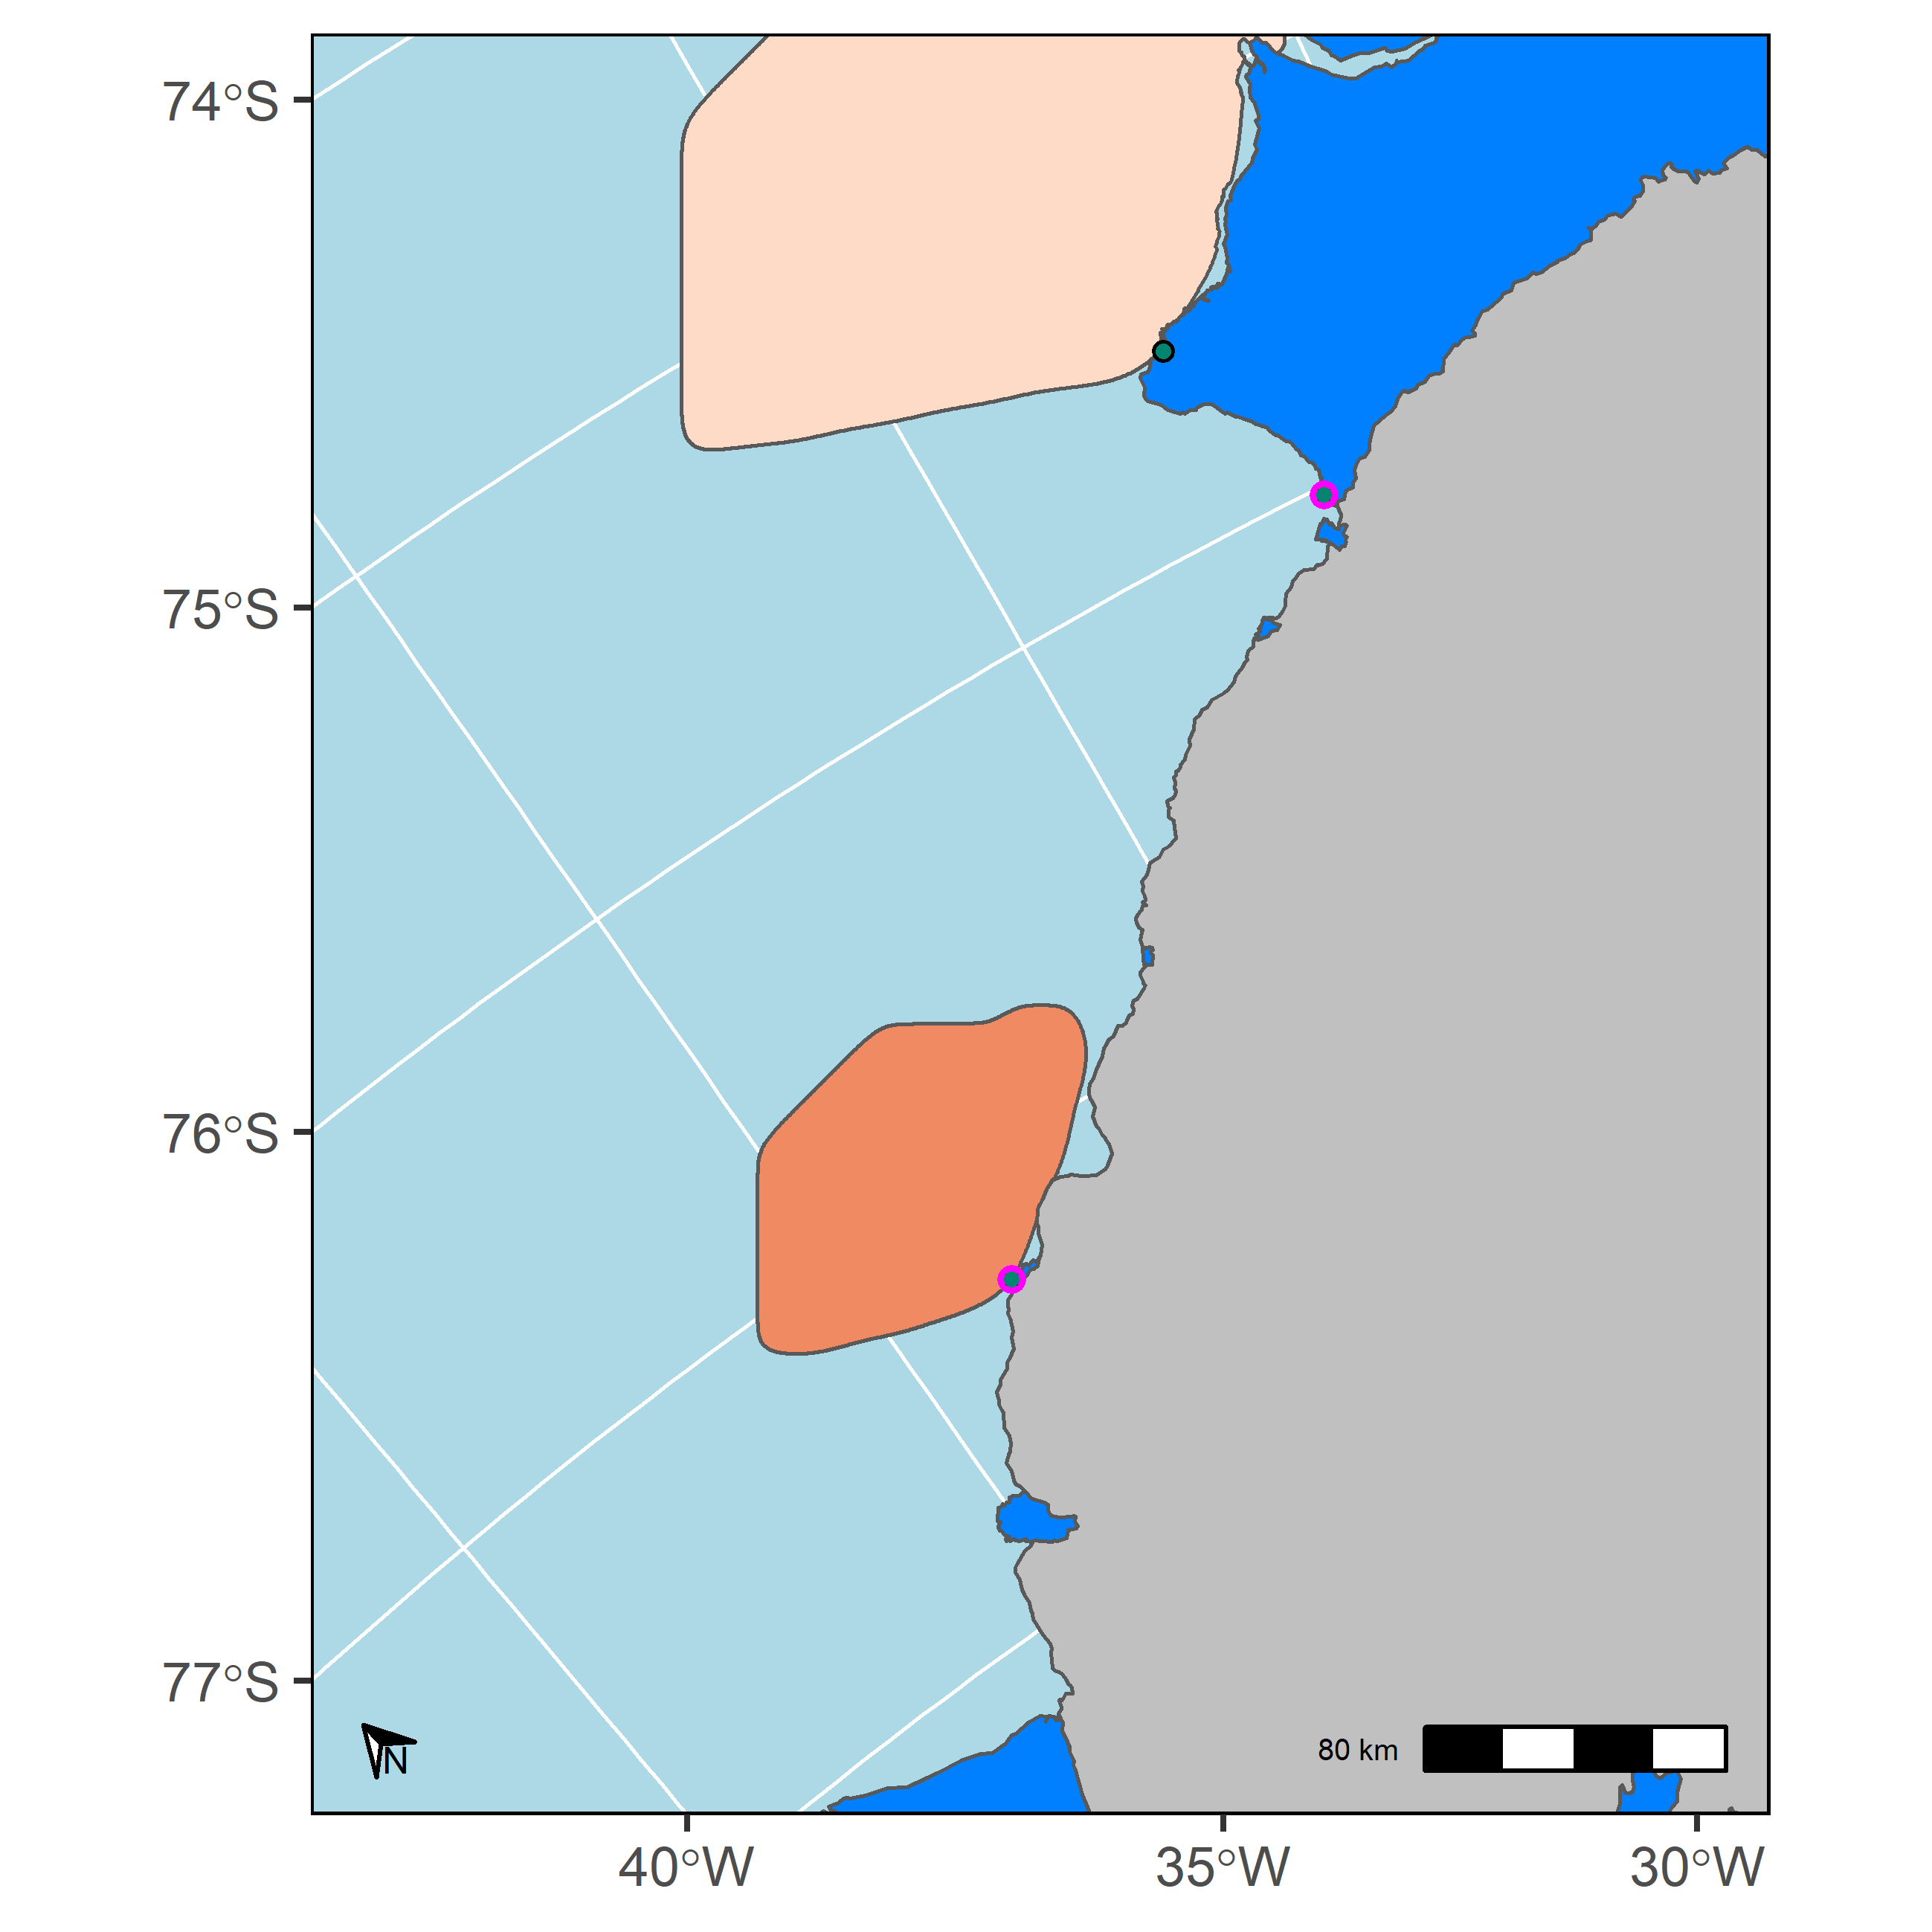


Figure A21.1: Focal Antarctica marine IBA 21 (orange polygon) for penguins, and other marine IBAs (light orange) for penguins identified during the project. Colonies circled in purple are those whose populations contributed to the marine IBA triggering IBA criteria A4 (>1% of the global population). See Table A21.2.

Table A21.1: Population estimates and count types (those that triggered IBA Criteria A4, >1% of global population) for key penguin species in Antarctic marine IBA 21. Key sources of colony input data associated with this marine IBA are detailed in Table A21.2. Population estimates refer to the lower and upper estimated number of adult breeding pairs likely to be using the marine IBA; derived from summing over all cells from individual colony density distribution surfaces which contributed to the identification of the marine IBA.

| Site code | Species | Count type | Lower | Upper |
| --- | --- | --- | --- | --- |
| 21 | EMP | min | 2592 | 6498 |
| 21 | EMP | max | 2592 | 6498 |
| 21 | EMP | median | 2592 | 6498 |
| 21 | EMP | recent | 2592 | 6498 |

Table A21.2: Population estimates (adult breeding pairs) and count types from individual colony(ies) density distribution surfaces which contributed to the identification of marine IBA: 21. I.e. The lower and upper estimated number of adult breeding pairs from a given colony that may utilise the marine IBA. Note, the lower population estimate represents the lowest estimated number of breeding pairs from a given colony contributing to the delineation of the marine IBA site. The lower population estimate may therefore be zero when only part of the individual colony(ies) density distribution surface contributed to the marine IBA. *The Count Year for the median population estimate indicates the number of yearly population assessments for the given colony. Colony names are given in the ‘Colony Codes’ table at the end of this document.

| Site code | Species | Colony | Count type | Lower | Upper | Count year* |
| --- | --- | --- | --- | --- | --- | --- |
| 21 | EMP | DAWS | min | 0 | 98 | 2009 |
| 21 | EMP | DAWS | max | 0 | 98 | 2009 |
| 21 | EMP | DAWS | median | 0 | 98 | 1 |
| 21 | EMP | DAWS | recent | 0 | 98 | 2009 |
| 21 | EMP | LUIT | min | 2536 | 6498 | 2009 |
| 21 | EMP | LUIT | max | 2536 | 6498 | 2009 |
| 21 | EMP | LUIT | median | 2536 | 6498 | 1 |
| 21 | EMP | LUIT | recent | 2536 | 6498 | 2009 |

# Antarctica marine IBA: 22

| Site code | 22 |
| --- | --- |
| Species | EMP |
| IBA criteria | A4: Congregations |
| Decimal Latitude | -74.929 |
| Decimal Longitude | -28.306 |
| Area (ha) | 1738593 |
| Area (km2) | 17385.93 |
| MPA Overlap | WSMPA_P1 |
| MPA Type | Proposed |
| MPA Zones | WSMPA_P1 |


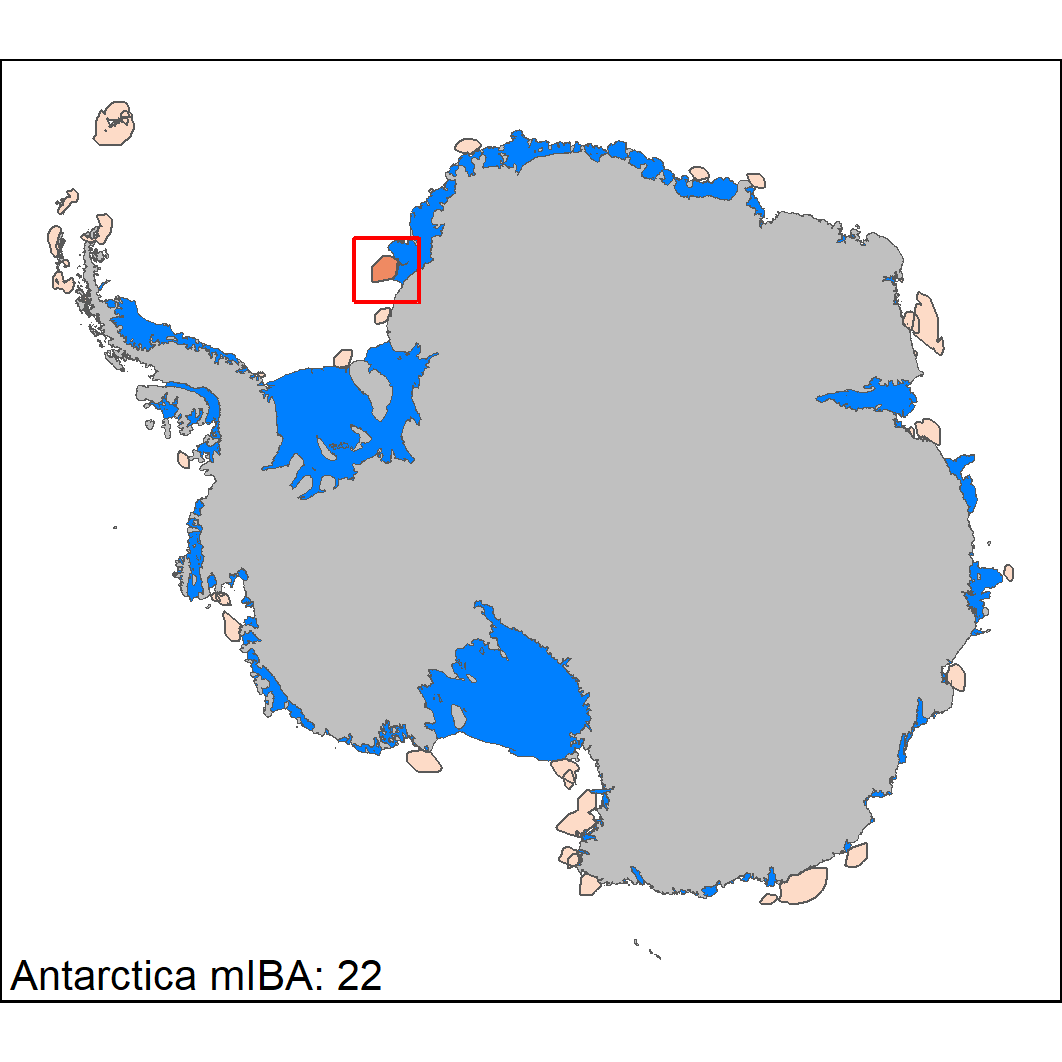


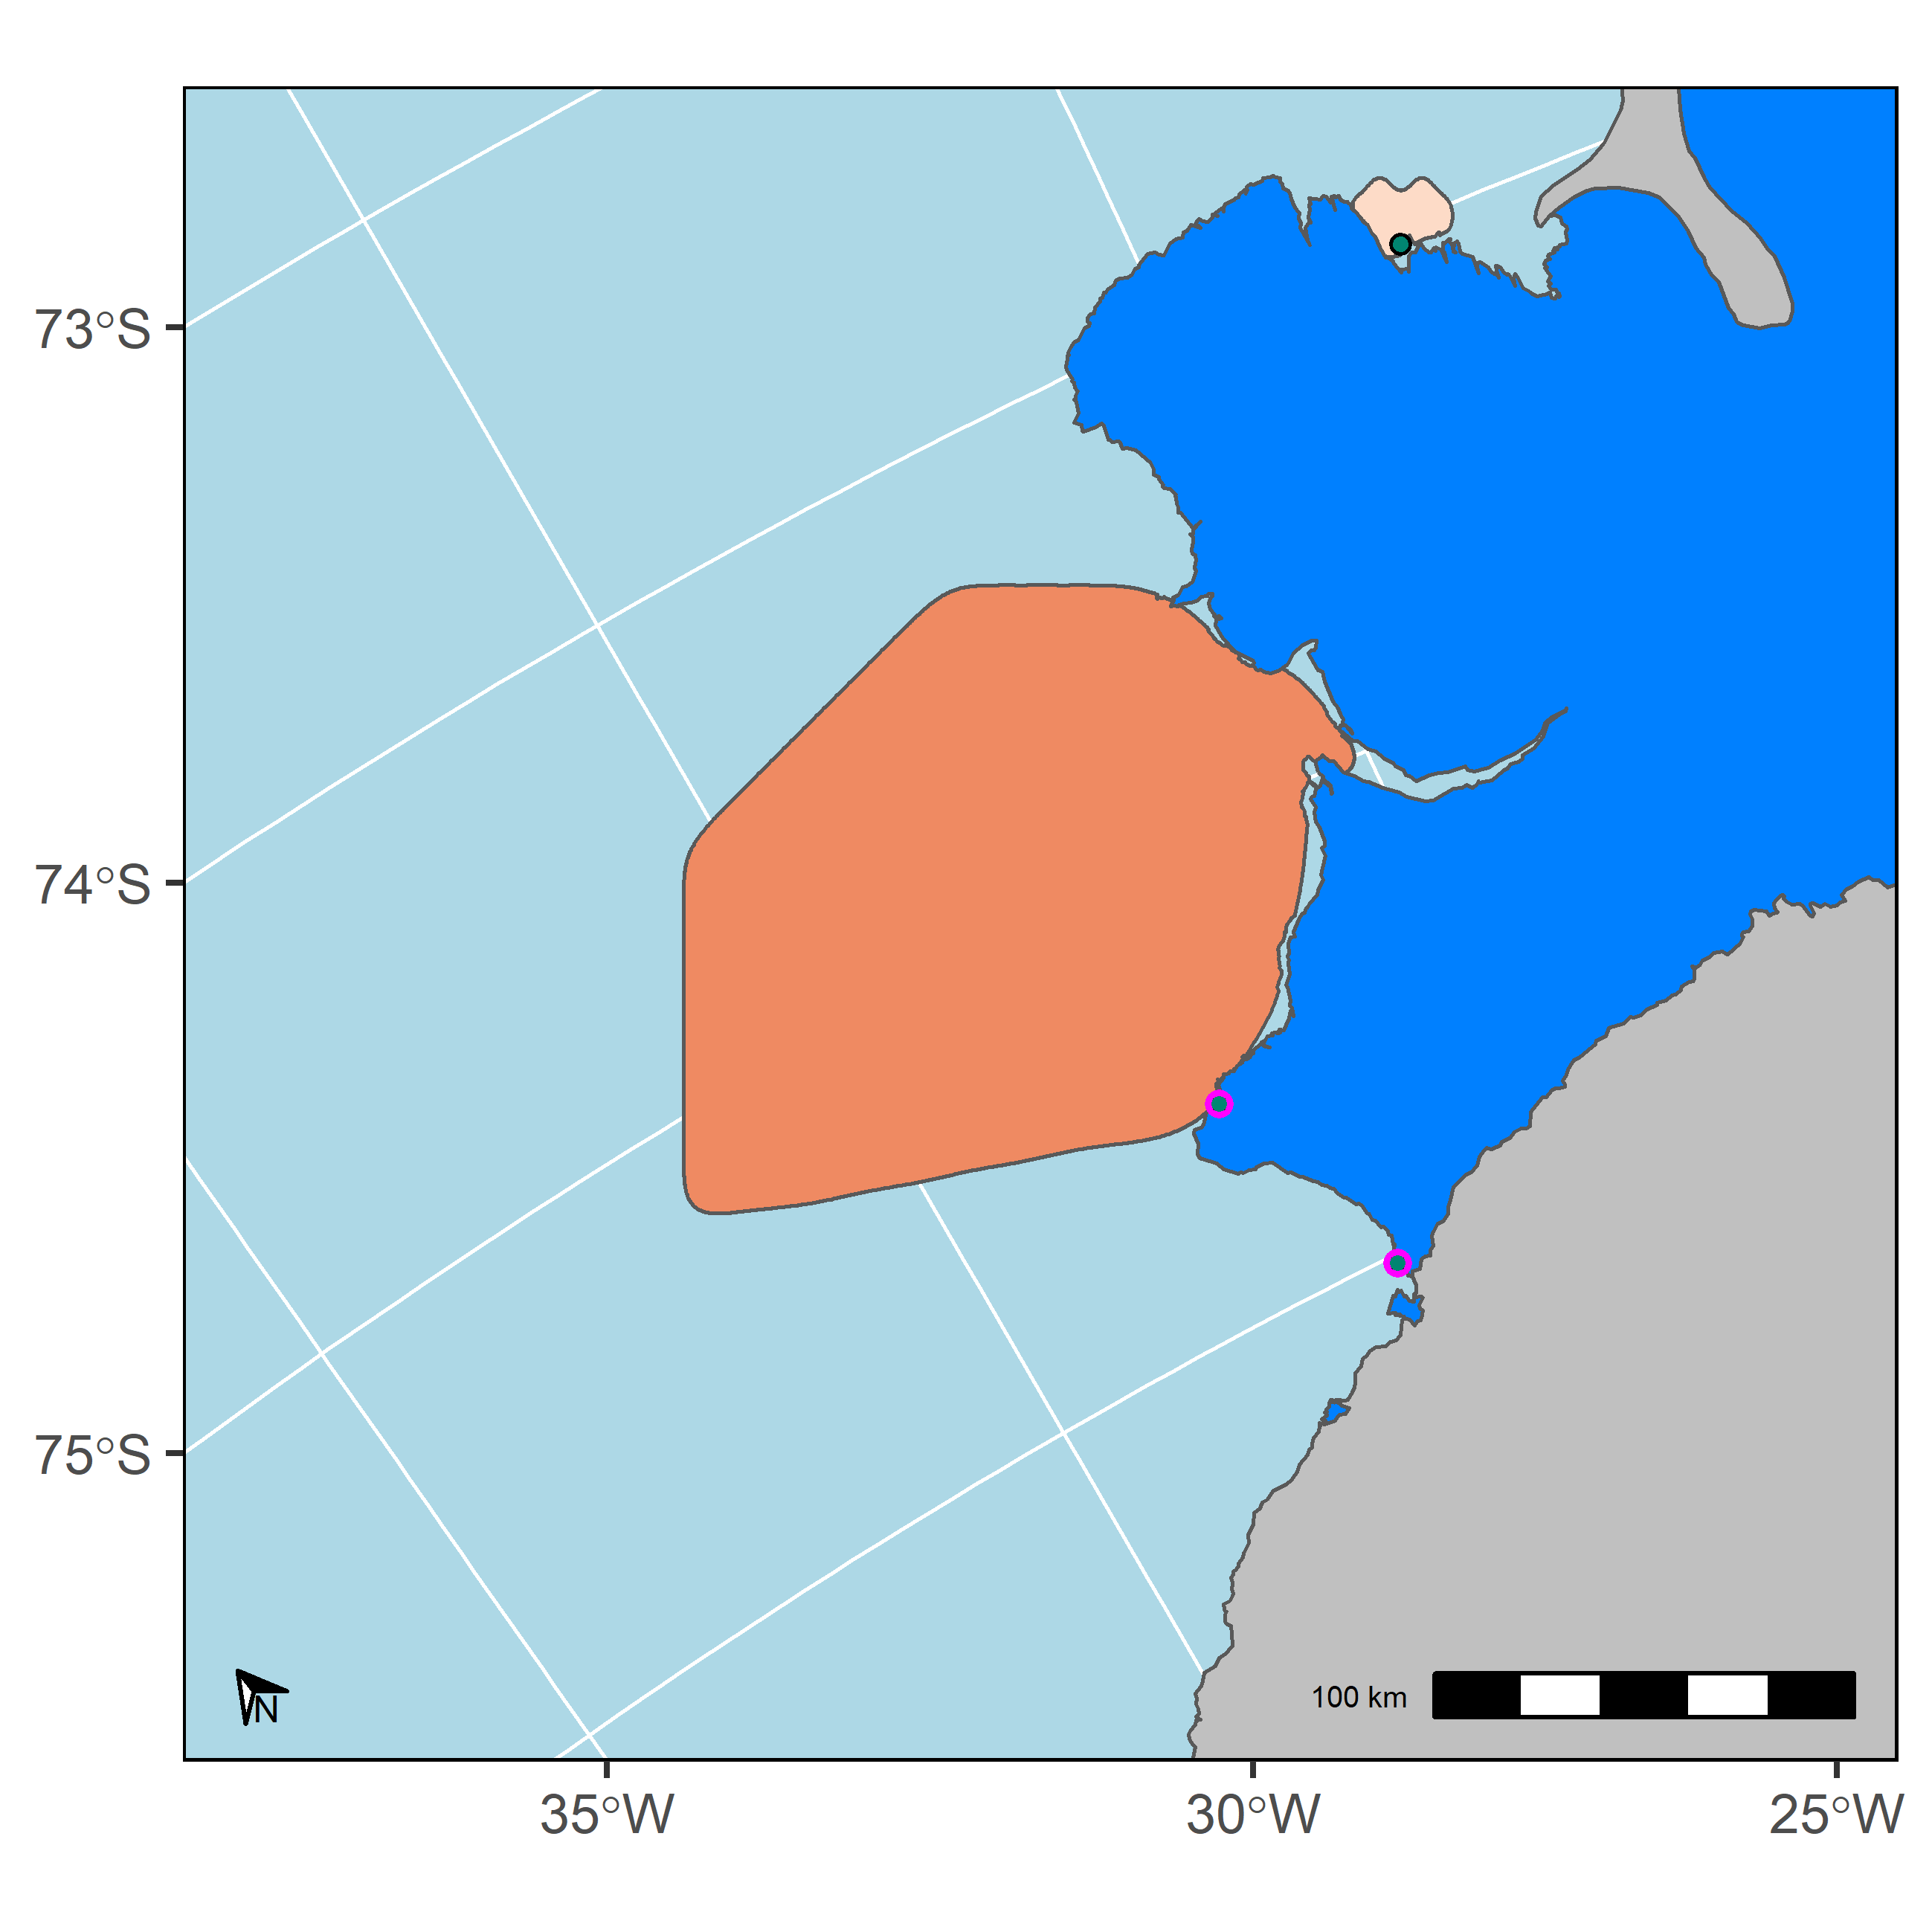


Figure A22.1: Focal Antarctica marine IBA 22 (orange polygon) for penguins, and other marine IBAs (light orange) for penguins identified during the project. Colonies circled in purple are those whose populations contributed to the marine IBA triggering IBA criteria A4 (>1% of the global population). See Table A22.2.

Table A22.1: Population estimates and count types (those that triggered IBA Criteria A4, >1% of global population) for key penguin species in Antarctic marine IBA 22. Key sources of colony input data associated with this marine IBA are detailed in Table A22.2. Population estimates refer to the lower and upper estimated number of adult breeding pairs likely to be using the marine IBA; derived from summing over all cells from individual colony density distribution surfaces which contributed to the identification of the marine IBA.

| Site code | Species | Count type | Lower | Upper |
| --- | --- | --- | --- | --- |
| 22 | EMP | min | 2649 | 22510 |
| 22 | EMP | max | 2649 | 22510 |
| 22 | EMP | median | 2649 | 22510 |
| 22 | EMP | recent | 2649 | 22510 |

Table A22.2: Population estimates (adult breeding pairs) and count types from individual colony(ies) density distribution surfaces which contributed to the identification of marine IBA: 22. I.e. The lower and upper estimated number of adult breeding pairs from a given colony that may utilise the marine IBA. Note, the lower population estimate represents the lowest estimated number of breeding pairs from a given colony contributing to the delineation of the marine IBA site. The lower population estimate may therefore be zero when only part of the individual colony(ies) density distribution surface contributed to the marine IBA. *The Count Year for the median population estimate indicates the number of yearly population assessments for the given colony. Colony names are given in the ‘Colony Codes’ table at the end of this document.

| Site code | Species | Colony | Count type | Lower | Upper | Count year* |
| --- | --- | --- | --- | --- | --- | --- |
| 22 | EMP | DAWS | min | 0 | 992 | 2009 |
| 22 | EMP | DAWS | max | 0 | 992 | 2009 |
| 22 | EMP | DAWS | median | 0 | 992 | 1 |
| 22 | EMP | DAWS | recent | 0 | 992 | 2009 |
| 22 | EMP | HALY | min | 2649 | 22510 | 2009 |
| 22 | EMP | HALY | max | 2649 | 22510 | 2009 |
| 22 | EMP | HALY | median | 2649 | 22510 | 1 |
| 22 | EMP | HALY | recent | 2649 | 22510 | 2009 |

# Antarctica marine IBA: 23

| Site code | 23 |
| --- | --- |
| Species | EMP |
| IBA criteria | A4: Congregations |
| Decimal Latitude | -73.981 |
| Decimal Longitude | -22.986 |
| Area (ha) | 29266.15 |
| Area (km2) | 292.6615 |
| MPA Overlap | WSMPA_P1 |
| MPA Type | Proposed |
| MPA Zones | WSMPA_P1 |


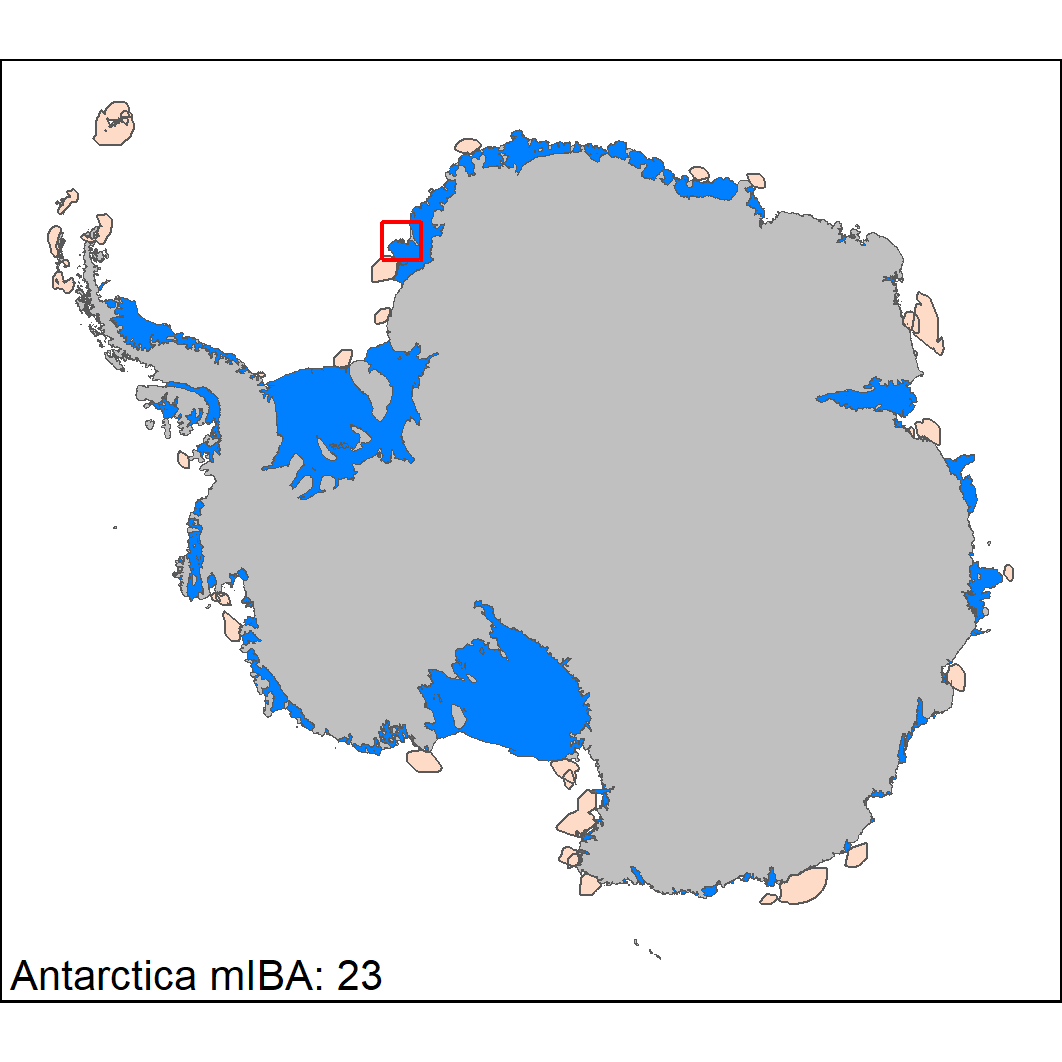


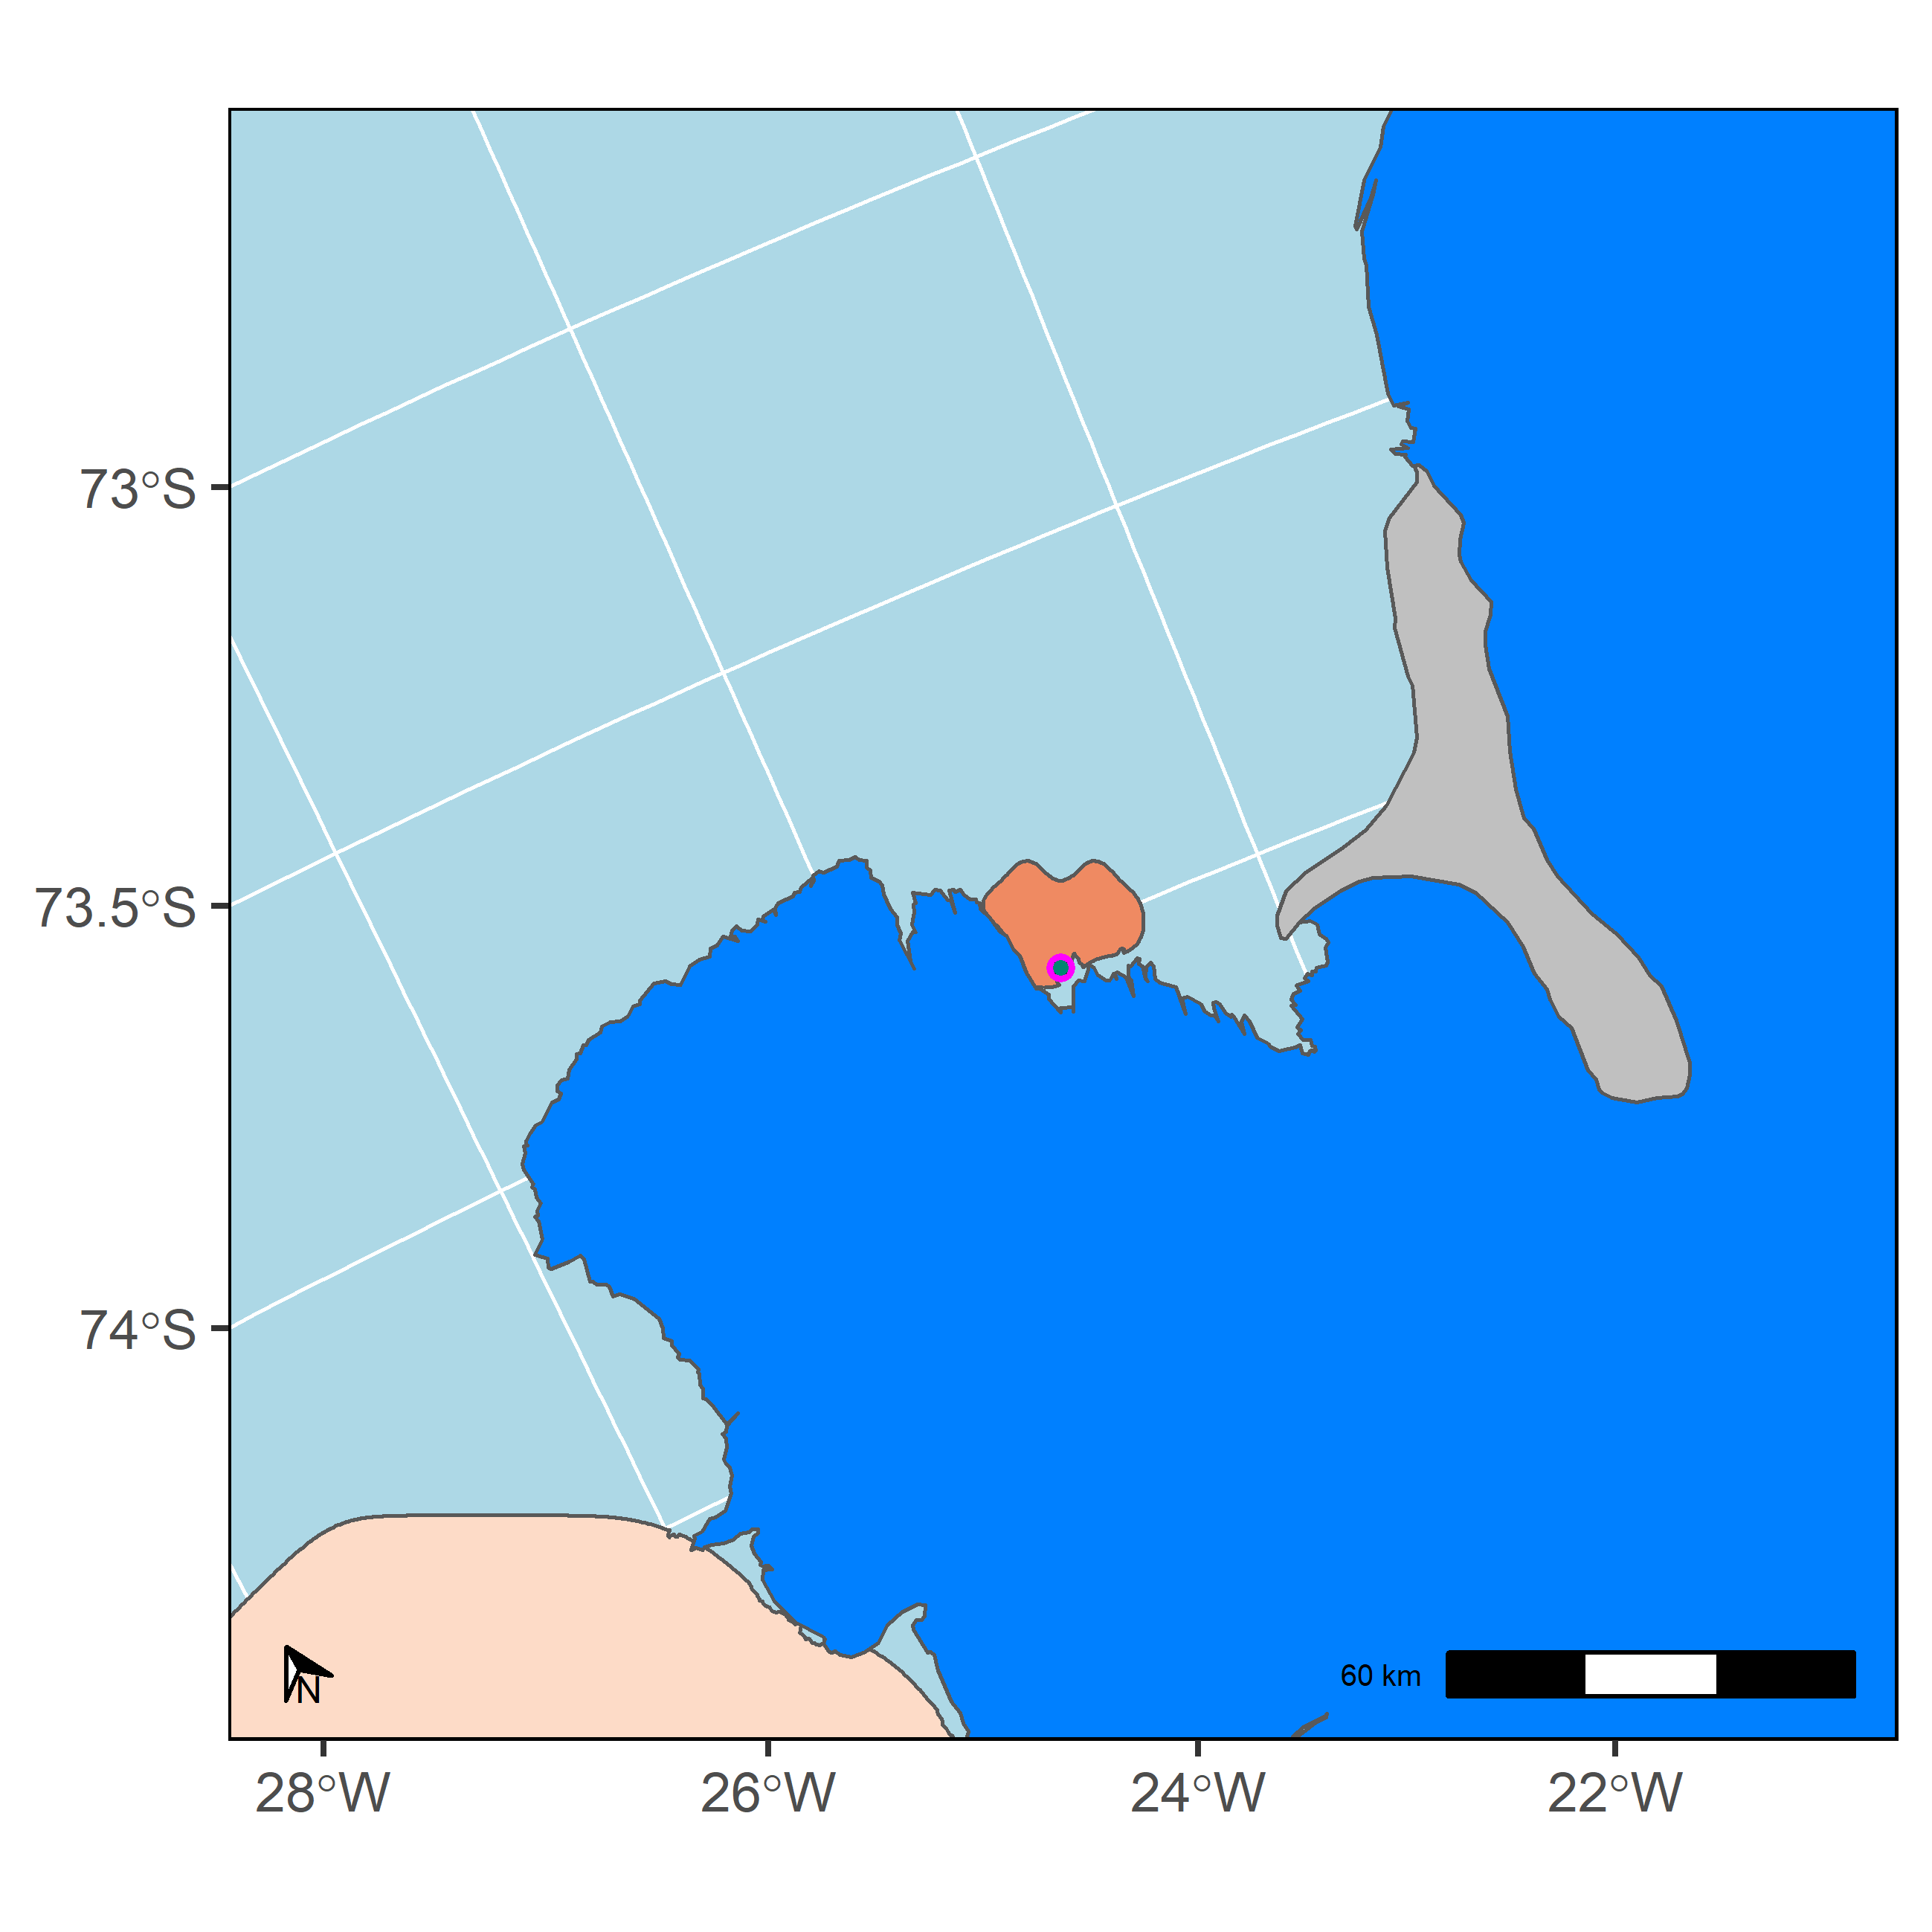


Figure A23.1: Focal Antarctica marine IBA 23 (orange polygon) for penguins, and other marine IBAs (light orange) for penguins identified during the project. Colonies circled in purple are those whose populations contributed to the marine IBA triggering IBA criteria A4 (>1% of the global population). See Table A23.2.

Table A23.1: Population estimates and count types (those that triggered IBA Criteria A4, >1% of global population) for key penguin species in Antarctic marine IBA 23. Key sources of colony input data associated with this marine IBA are detailed in Table A23.2. Population estimates refer to the lower and upper estimated number of adult breeding pairs likely to be using the marine IBA; derived from summing over all cells from individual colony density distribution surfaces which contributed to the identification of the marine IBA.

| Site code | Species | Count type | Lower | Upper |
| --- | --- | --- | --- | --- |
| 23 | EMP | max | 3327 | 5455 |
| 23 | EMP | median | 2579 | 4228 |
| 23 | EMP | recent | 3327 | 5455 |

Table A23.2: Population estimates (adult breeding pairs) and count types from individual colony(ies) density distribution surfaces which contributed to the identification of marine IBA: 23. I.e. The lower and upper estimated number of adult breeding pairs from a given colony that may utilise the marine IBA. Note, the lower population estimate represents the lowest estimated number of breeding pairs from a given colony contributing to the delineation of the marine IBA site. The lower population estimate may therefore be zero when only part of the individual colony(ies) density distribution surface contributed to the marine IBA. *The Count Year for the median population estimate indicates the number of yearly population assessments for the given colony. Colony names are given in the ‘Colony Codes’ table at the end of this document.

| Site code | Species | Colony | Count type | Lower | Upper | Count year* |
| --- | --- | --- | --- | --- | --- | --- |
| 23 | EMP | STCB | max | 3327 | 5455 | 2009 |
| 23 | EMP | STCB | median | 2579 | 4228 | 2 |
| 23 | EMP | STCB | recent | 3327 | 5455 | 2009 |

# Antarctica marine IBA: 24

| Site code | 24 |
| --- | --- |
| Species | EMP |
| IBA criteria | A4: Congregations |
| Decimal Latitude | -72.045 |
| Decimal Longitude | -15.165 |
| Area (ha) | 39811.11 |
| Area (km2) | 398.1111 |
| MPA Overlap | WSMPA_P1 |
| MPA Type | Proposed |
| MPA Zones | WSMPA_P1 |


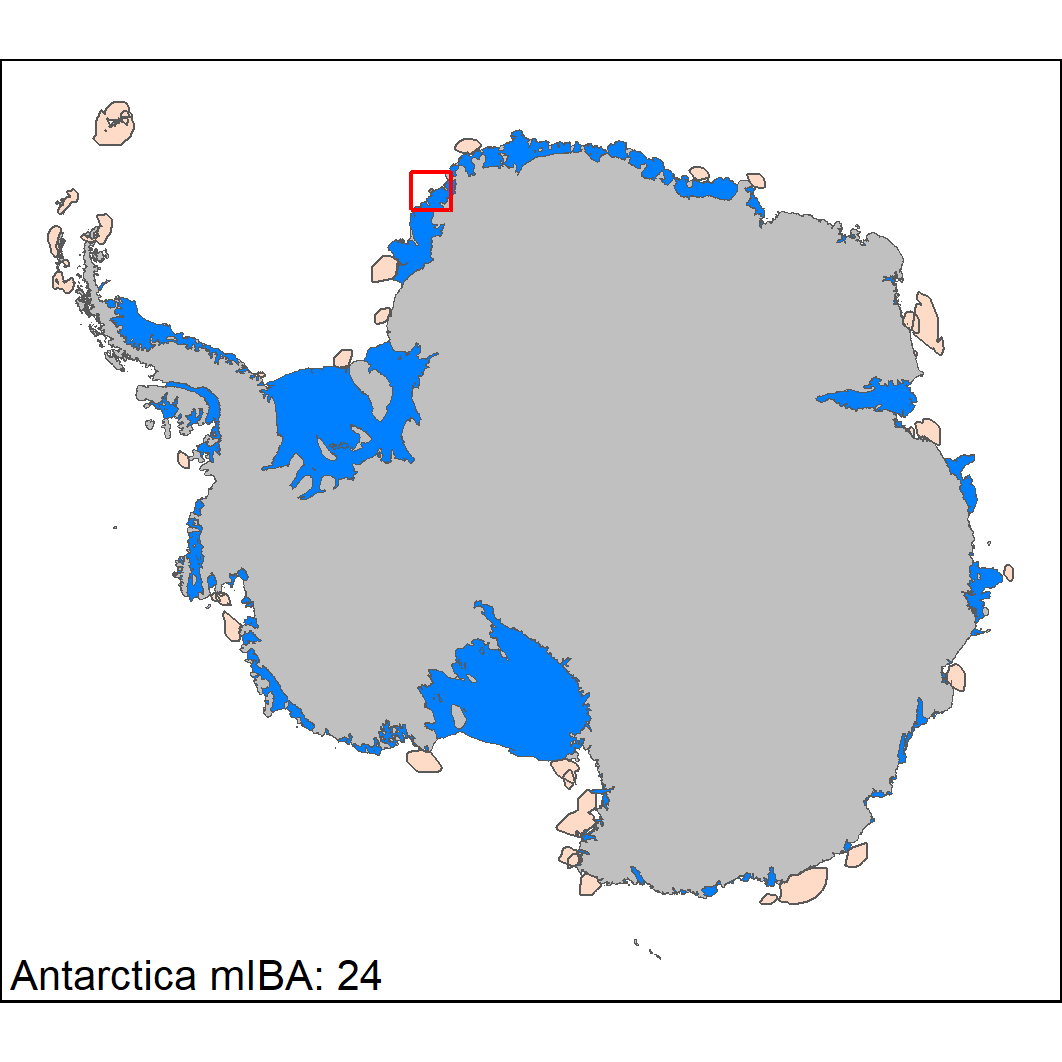


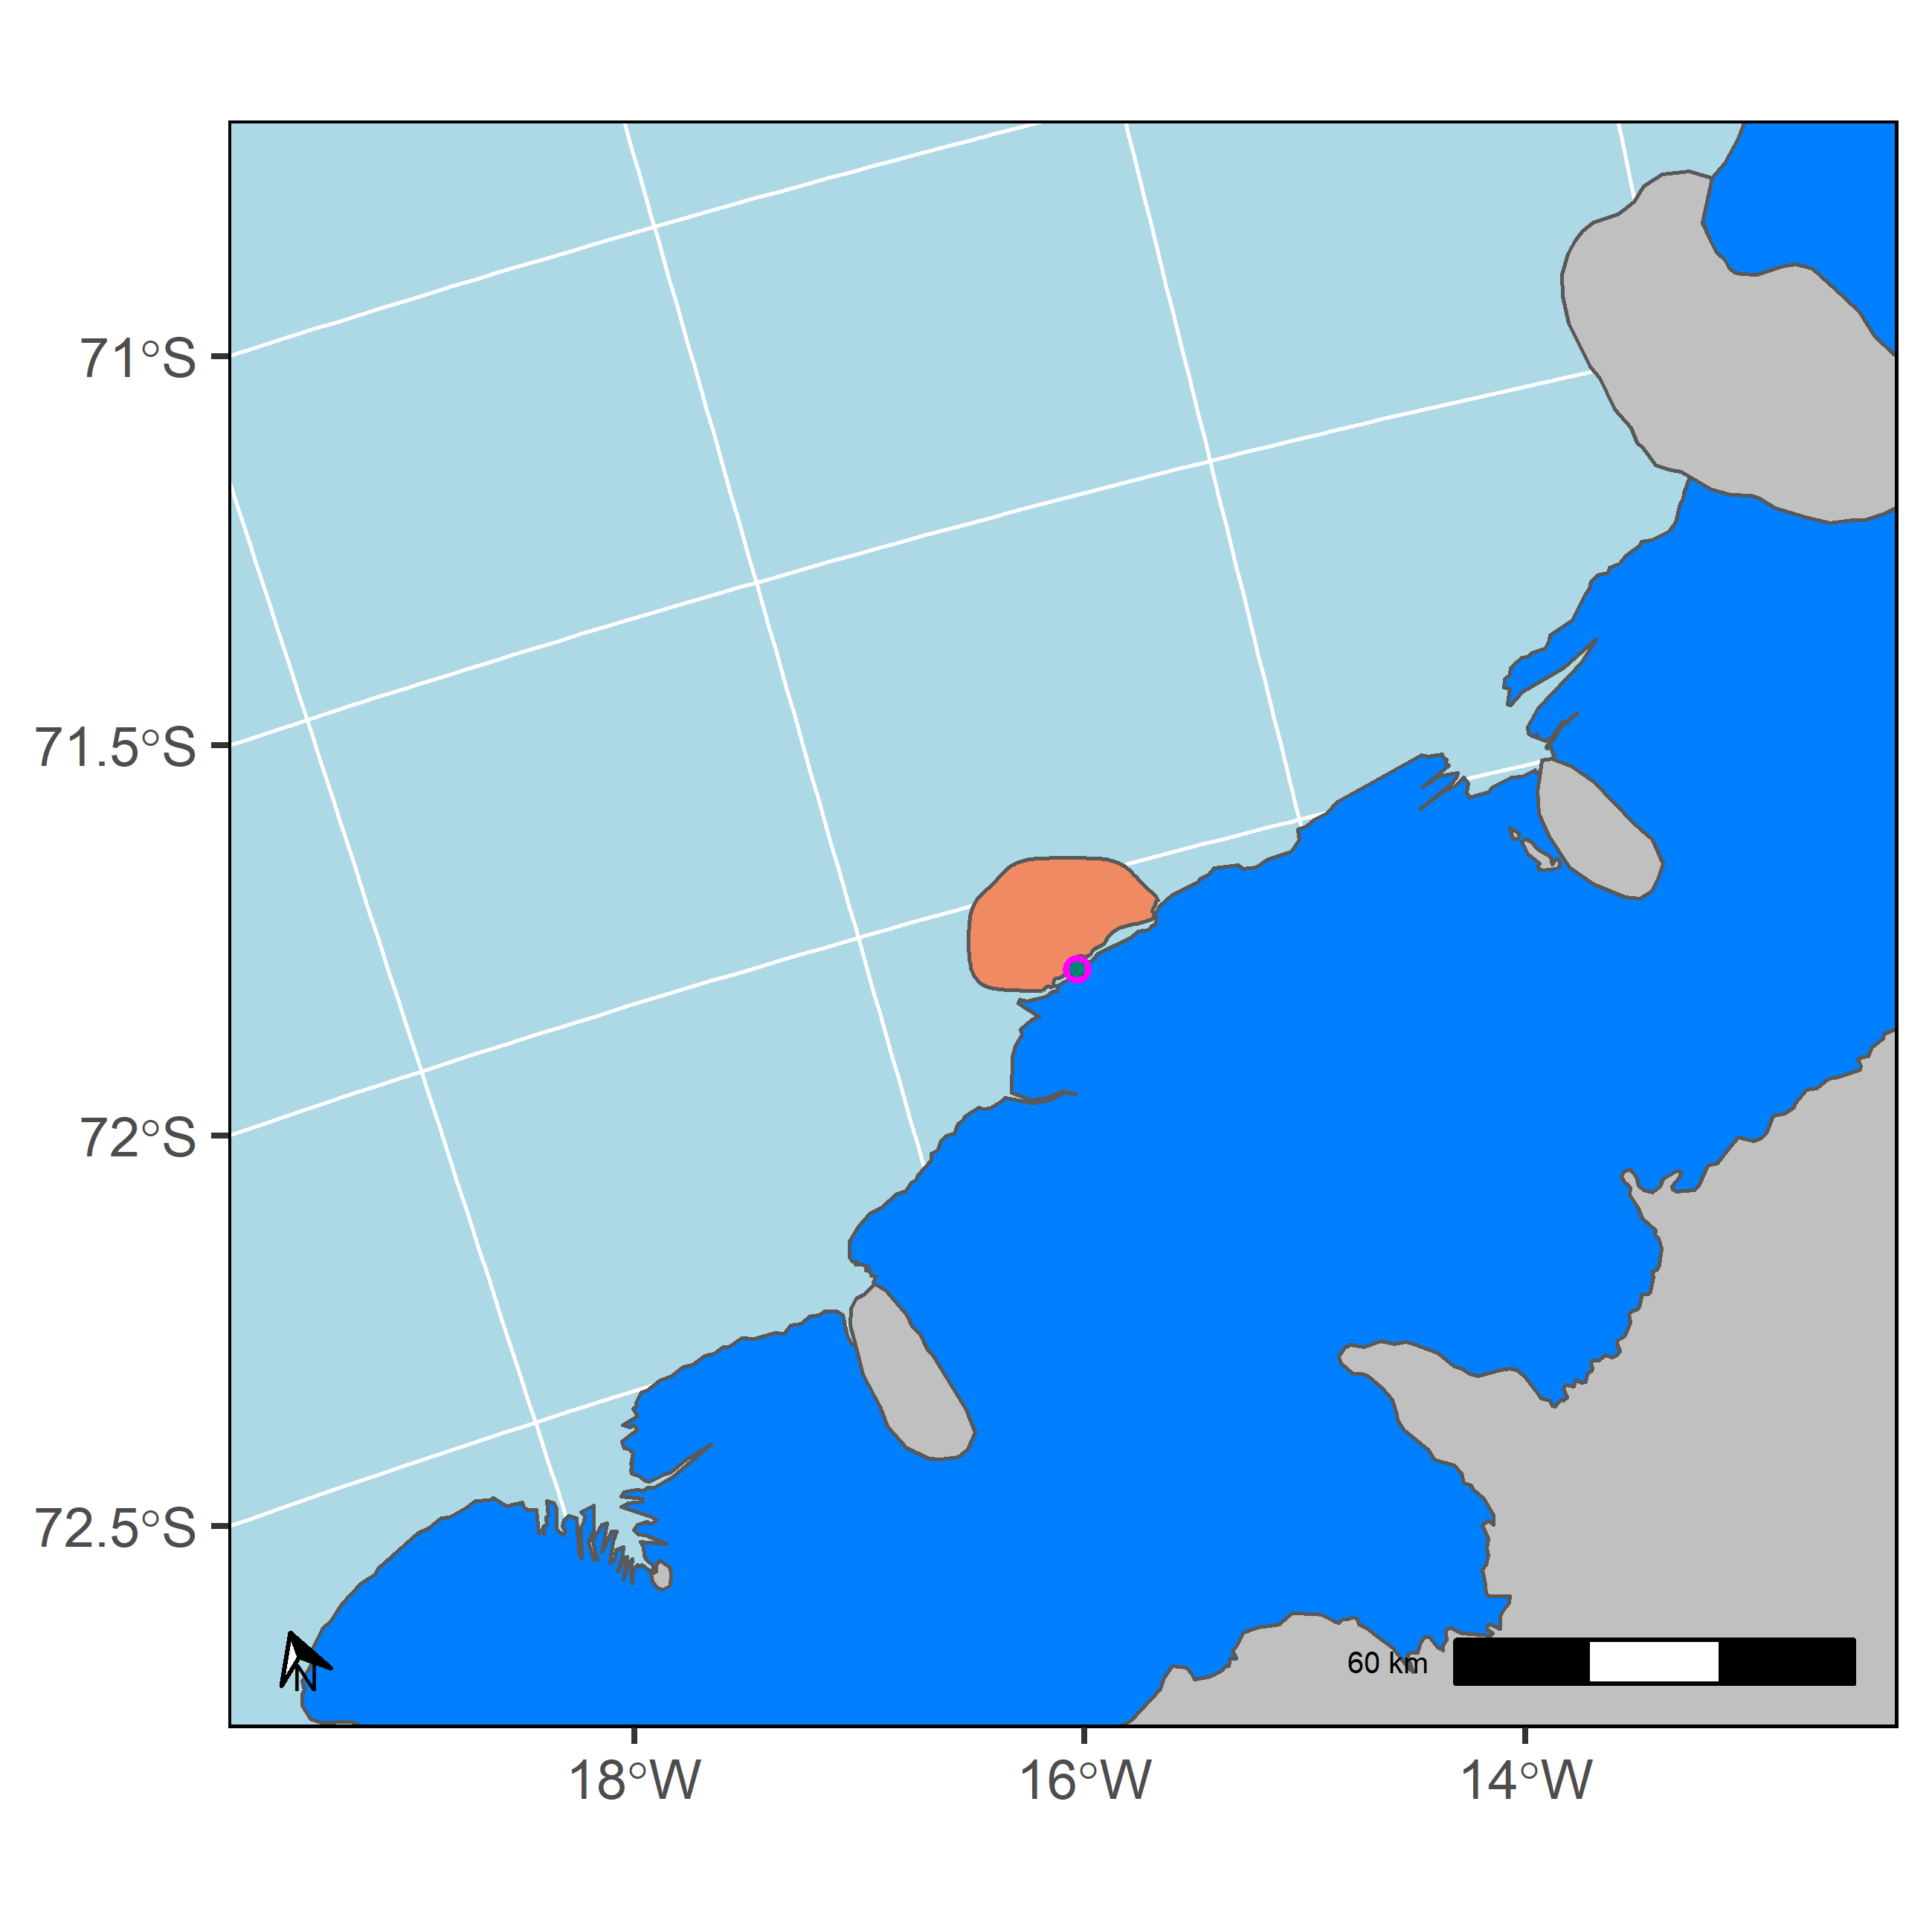


Figure A24.1: Focal Antarctica marine IBA 24 (orange polygon) for penguins, and other marine IBAs (light orange) for penguins identified during the project. Colonies circled in purple are those whose populations contributed to the marine IBA triggering IBA criteria A4 (>1% of the global population). See Table A24.2.

Table A24.1: Population estimates and count types (those that triggered IBA Criteria A4, >1% of global population) for key penguin species in Antarctic marine IBA 24. Key sources of colony input data associated with this marine IBA are detailed in Table A24.2. Population estimates refer to the lower and upper estimated number of adult breeding pairs likely to be using the marine IBA; derived from summing over all cells from individual colony density distribution surfaces which contributed to the identification of the marine IBA.

| Site code | Species | Count type | Lower | Upper |
| --- | --- | --- | --- | --- |
| 24 | EMP | min | 2579 | 4013 |
| 24 | EMP | max | 2579 | 4013 |
| 24 | EMP | median | 2579 | 4013 |
| 24 | EMP | recent | 2579 | 4013 |

Table A24.2: Population estimates (adult breeding pairs) and count types from individual colony(ies) density distribution surfaces which contributed to the identification of marine IBA: 24. I.e. The lower and upper estimated number of adult breeding pairs from a given colony that may utilise the marine IBA. Note, the lower population estimate represents the lowest estimated number of breeding pairs from a given colony contributing to the delineation of the marine IBA site. The lower population estimate may therefore be zero when only part of the individual colony(ies) density distribution surface contributed to the marine IBA. *The Count Year for the median population estimate indicates the number of yearly population assessments for the given colony. Colony names are given in the ‘Colony Codes’ table at the end of this document.

| Site code | Species | Colony | Count type | Lower | Upper | Count year* |
| --- | --- | --- | --- | --- | --- | --- |
| 24 | EMP | RIIS | min | 2579 | 4013 | 2009 |
| 24 | EMP | RIIS | max | 2579 | 4013 | 2009 |
| 24 | EMP | RIIS | median | 2579 | 4013 | 1 |
| 24 | EMP | RIIS | recent | 2579 | 4013 | 2009 |

# Antarctica marine IBA: 25

| Site code | 25 |
| --- | --- |
| Species | EMP |
| IBA criteria | A4: Congregations |
| Decimal Latitude | -70.181 |
| Decimal Longitude | -8.086 |
| Area (ha) | 903113.8 |
| Area (km2) | 9031.138 |
| MPA Overlap | WSMPA_P1 |
| MPA Type | Proposed |
| MPA Zones | WSMPA_P1 |


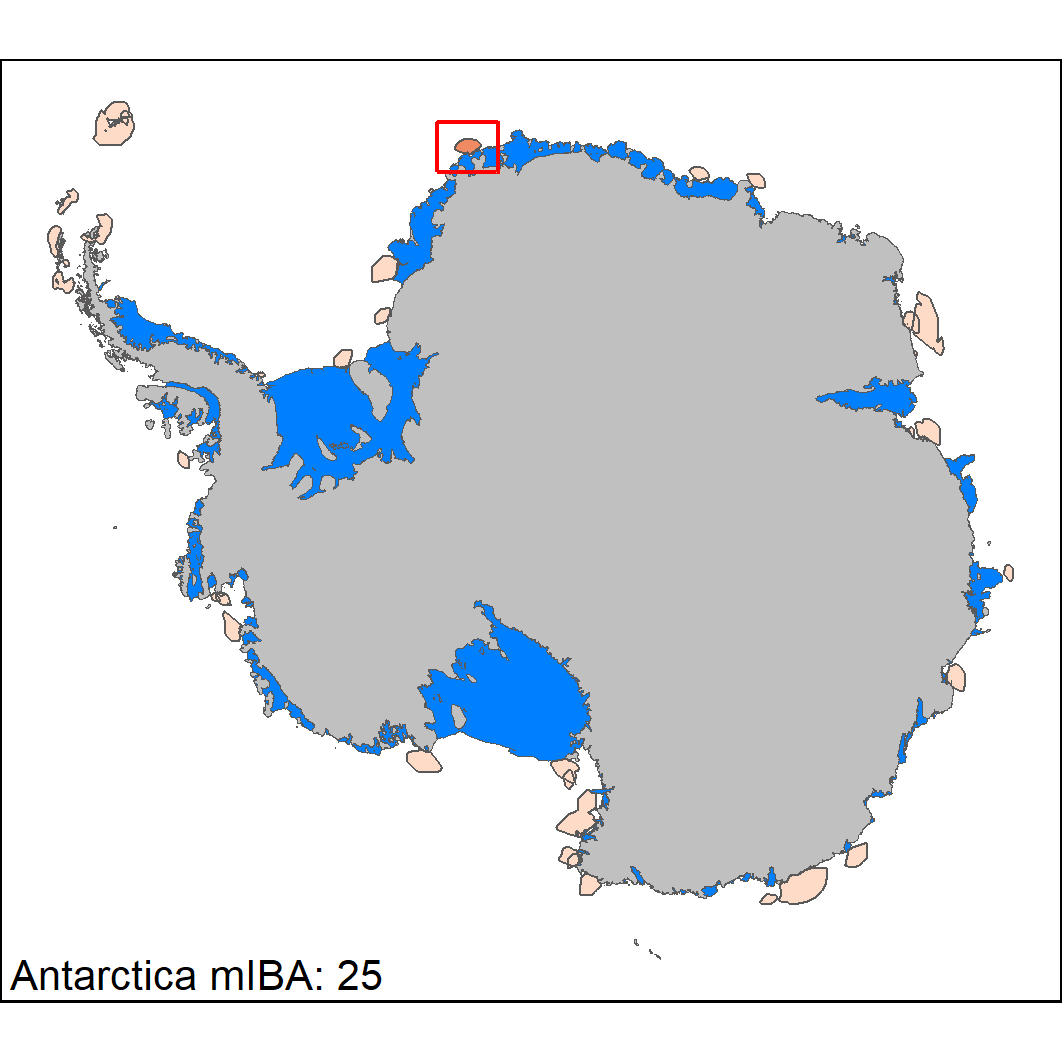


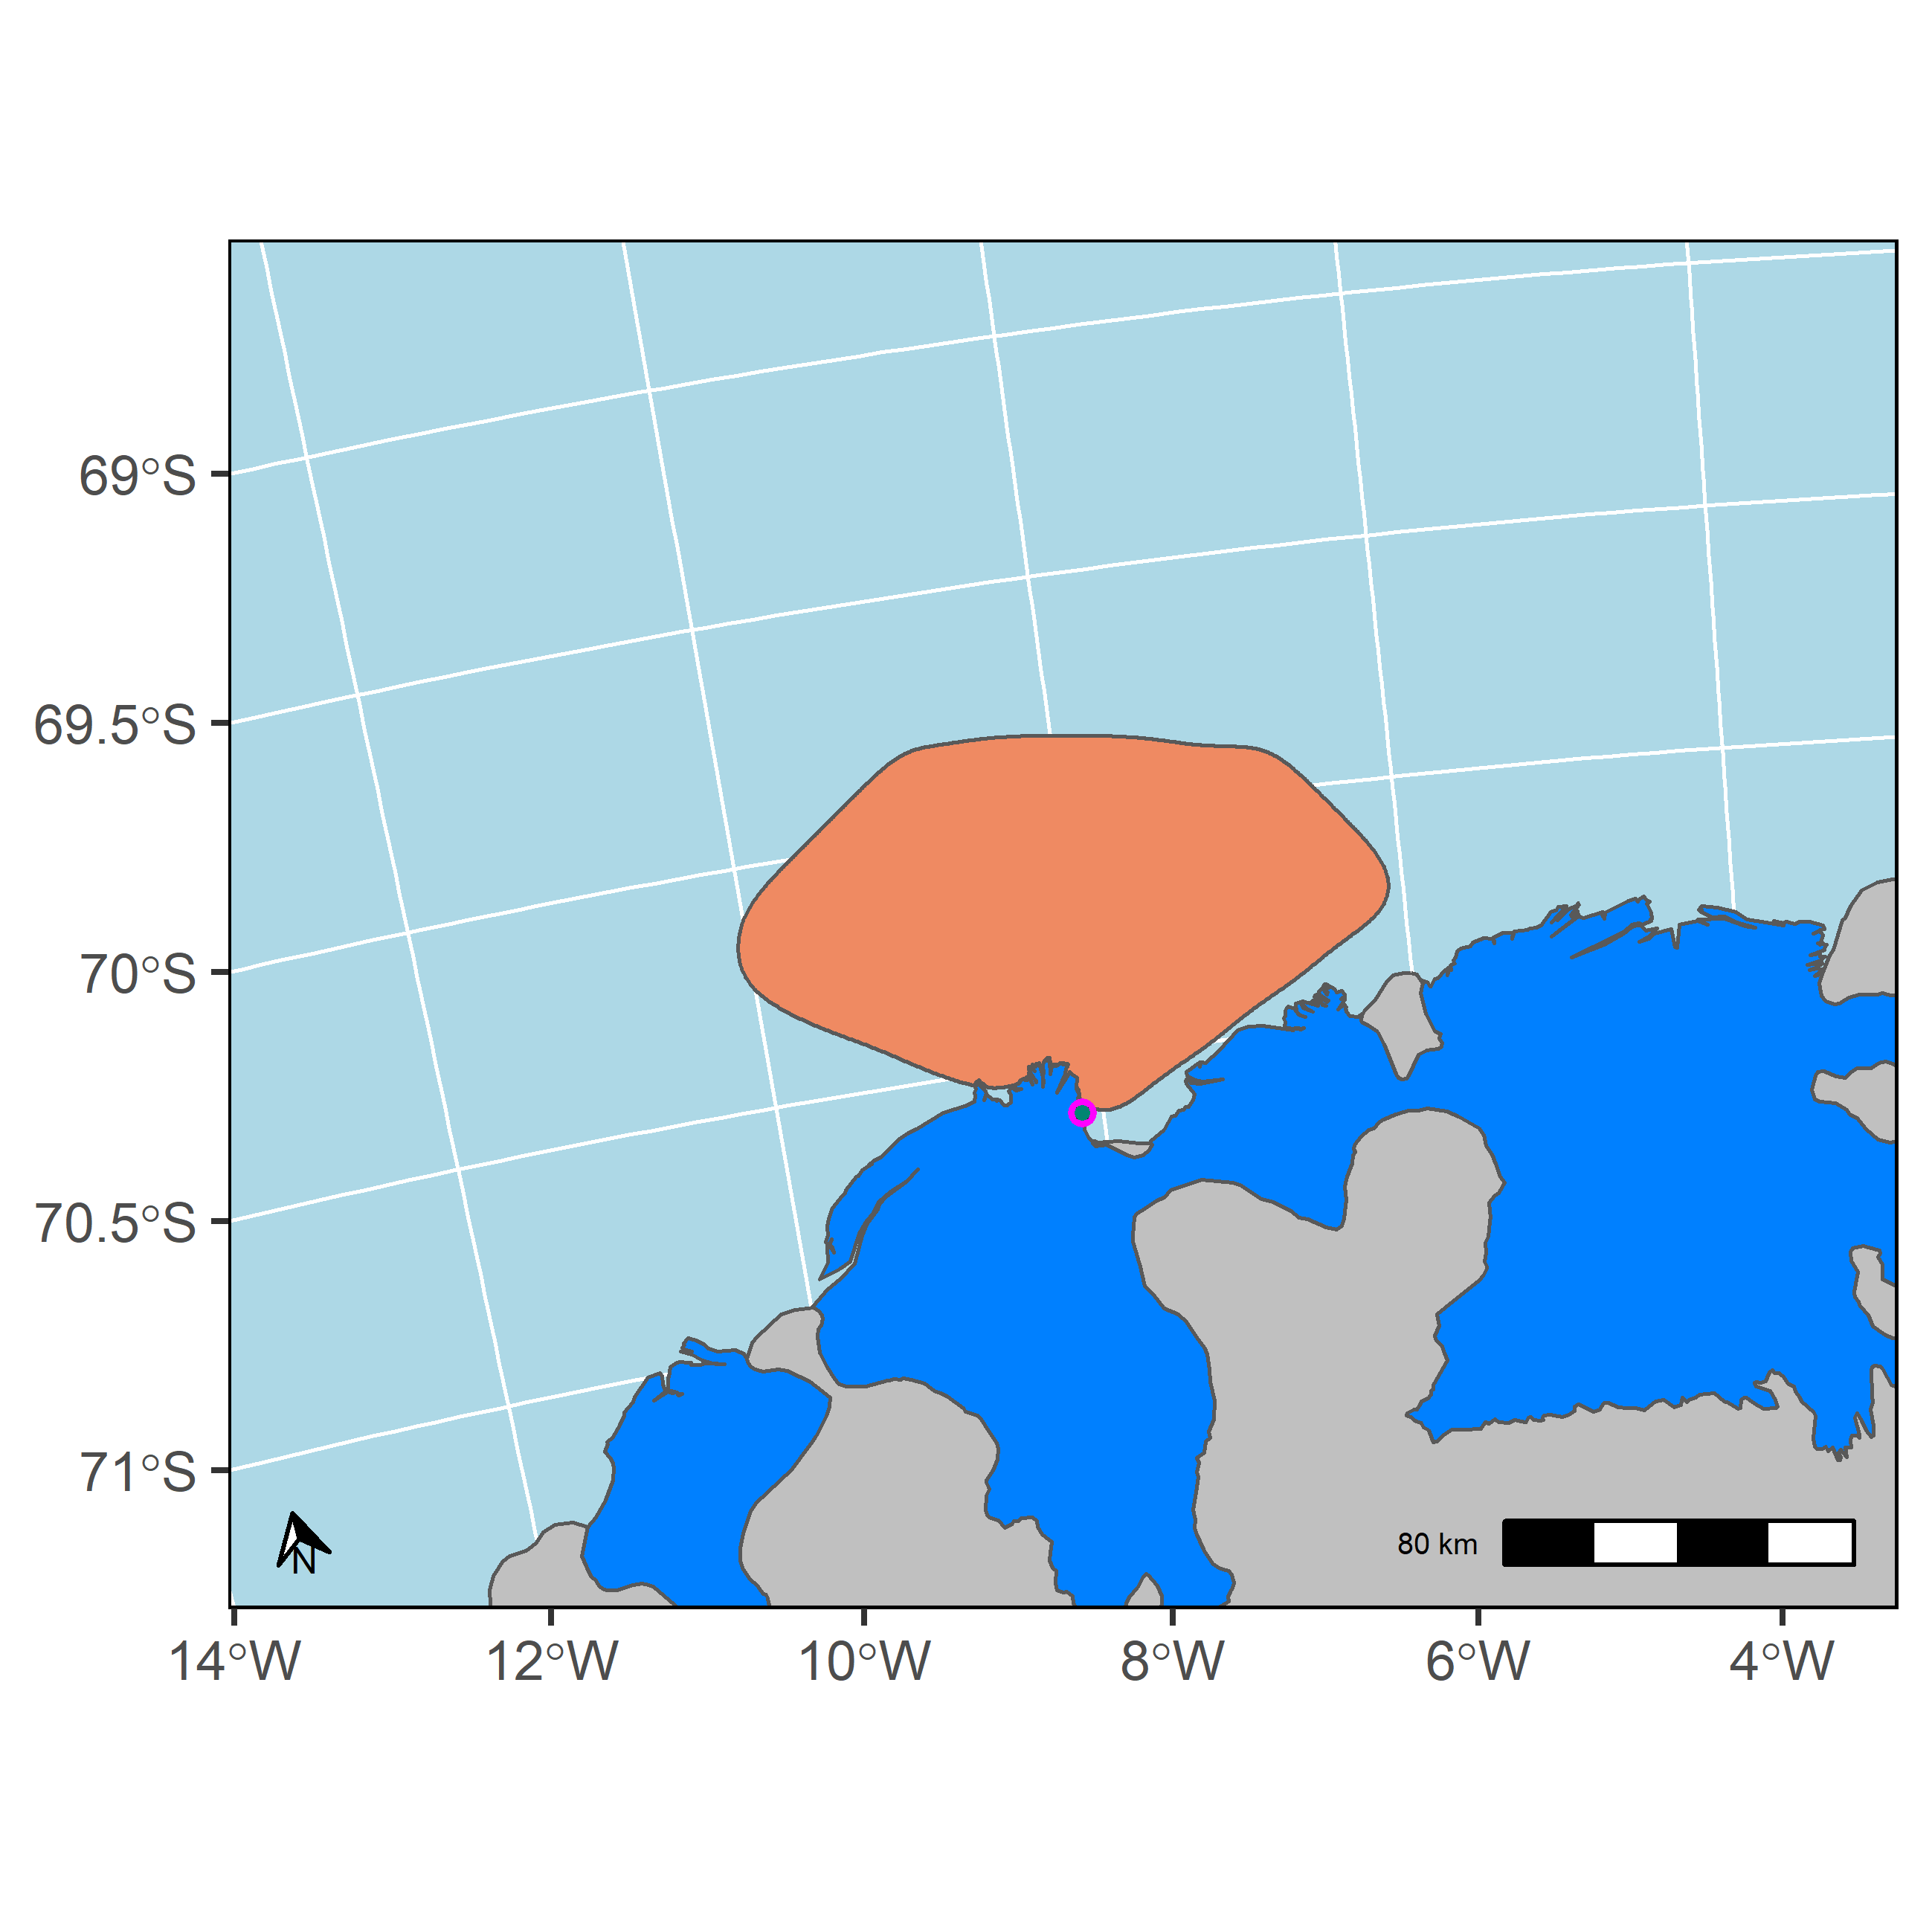


Figure A25.1: Focal Antarctica marine IBA 25 (orange polygon) for penguins, and other marine IBAs (light orange) for penguins identified during the project. Colonies circled in purple are those whose populations contributed to the marine IBA triggering IBA criteria A4 (>1% of the global population). See Table A25.2.

Table A25.1: Population estimates and count types (those that triggered IBA Criteria A4, >1% of global population) for key penguin species in Antarctic marine IBA 25. Key sources of colony input data associated with this marine IBA are detailed in Table A25.2. Population estimates refer to the lower and upper estimated number of adult breeding pairs likely to be using the marine IBA; derived from summing over all cells from individual colony density distribution surfaces which contributed to the identification of the marine IBA.

| Site code | Species | Count type | Lower | Upper |
| --- | --- | --- | --- | --- |
| 25 | EMP | min | 2566 | 9657 |
| 25 | EMP | max | 2566 | 9657 |
| 25 | EMP | median | 2566 | 9657 |
| 25 | EMP | recent | 2566 | 9657 |

Table A25.2: Population estimates (adult breeding pairs) and count types from individual colony(ies) density distribution surfaces which contributed to the identification of marine IBA: 25. I.e. The lower and upper estimated number of adult breeding pairs from a given colony that may utilise the marine IBA. Note, the lower population estimate represents the lowest estimated number of breeding pairs from a given colony contributing to the delineation of the marine IBA site. The lower population estimate may therefore be zero when only part of the individual colony(ies) density distribution surface contributed to the marine IBA. *The Count Year for the median population estimate indicates the number of yearly population assessments for the given colony. Colony names are given in the ‘Colony Codes’ table at the end of this document.

| Site code | Species | Colony | Count type | Lower | Upper | Count year* |
| --- | --- | --- | --- | --- | --- | --- |
| 25 | EMP | ATKA | min | 2566 | 9657 | 2009 |
| 25 | EMP | ATKA | max | 2566 | 9657 | 2009 |
| 25 | EMP | ATKA | median | 2566 | 9657 | 1 |
| 25 | EMP | ATKA | recent | 2566 | 9657 | 2009 |

# Antarctica marine IBA: 26

| Site code | 26 |
| --- | --- |
| Species | EMP |
| IBA criteria | A4: Congregations |
| Decimal Latitude | -69.58 |
| Decimal Longitude | 26.983 |
| Area (ha) | 583678.7 |
| Area (km2) | 5836.787 |
| MPA Overlap | WSMPA_P2 |
| MPA Type | Planning_domain |
| MPA Zones | WSMPA_P2 |


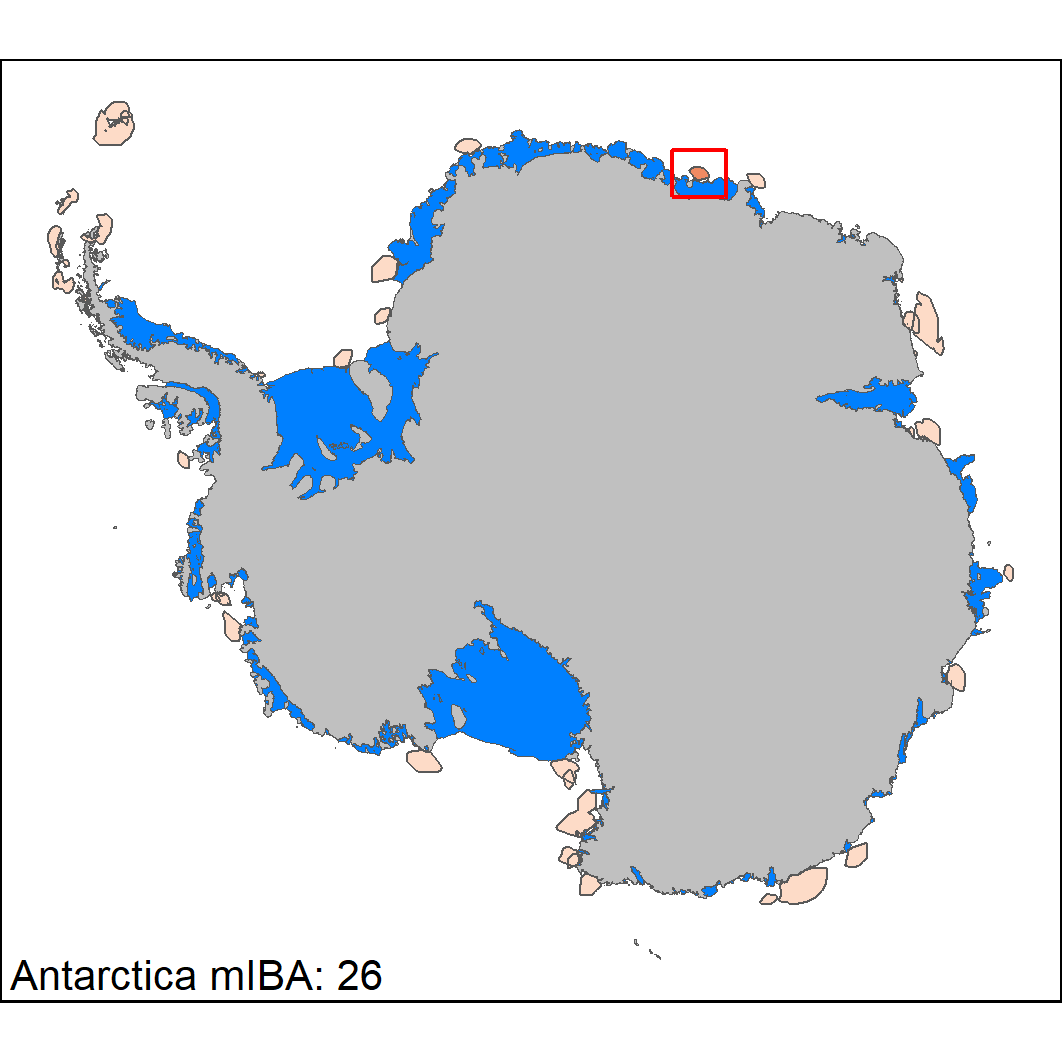


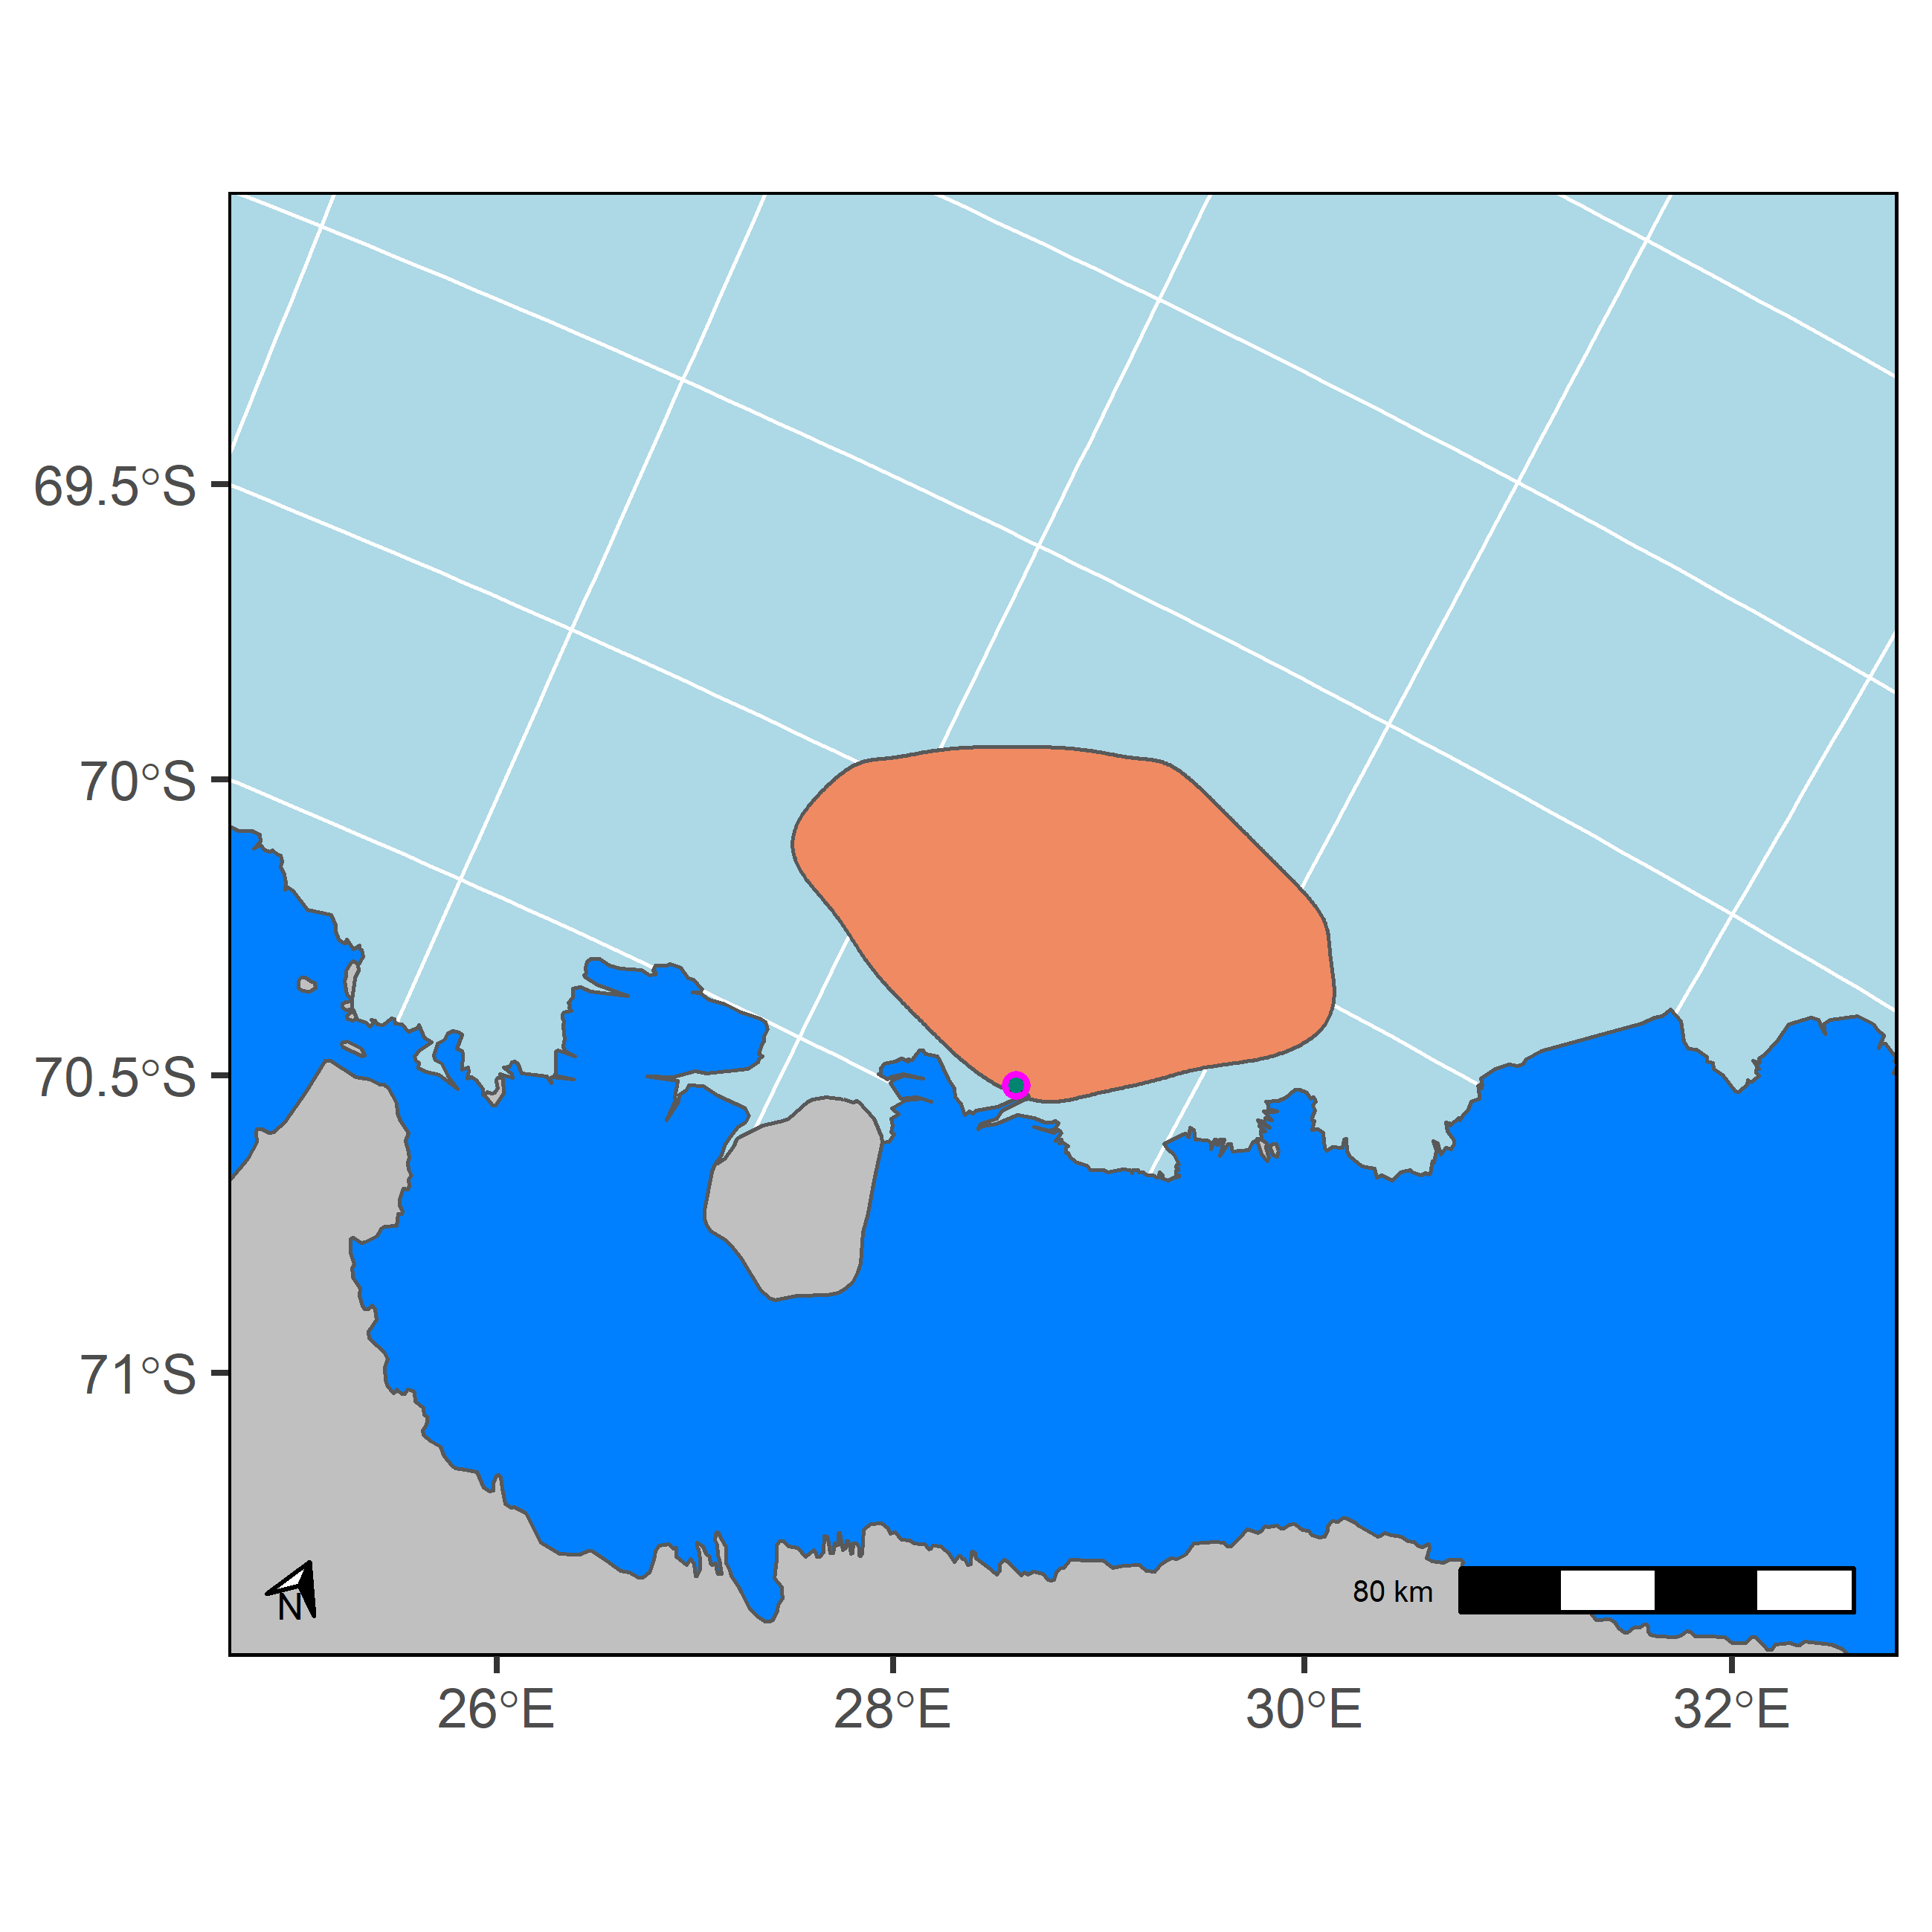


Figure A26.1: Focal Antarctica marine IBA 26 (orange polygon) for penguins, and other marine IBAs (light orange) for penguins identified during the project. Colonies circled in purple are those whose populations contributed to the marine IBA triggering IBA criteria A4 (>1% of the global population). See Table A26.2.

Table A26.1: Population estimates and count types (those that triggered IBA Criteria A4, >1% of global population) for key penguin species in Antarctic marine IBA 26. Key sources of colony input data associated with this marine IBA are detailed in Table A26.2. Population estimates refer to the lower and upper estimated number of adult breeding pairs likely to be using the marine IBA; derived from summing over all cells from individual colony density distribution surfaces which contributed to the identification of the marine IBA.

| Site code | Species | Count type | Lower | Upper |
| --- | --- | --- | --- | --- |
| 26 | EMP | min | 2568 | 6870 |
| 26 | EMP | max | 2568 | 6870 |
| 26 | EMP | median | 2568 | 6870 |
| 26 | EMP | recent | 2568 | 6870 |

Table A26.2: Population estimates (adult breeding pairs) and count types from individual colony(ies) density distribution surfaces which contributed to the identification of marine IBA: 26. I.e. The lower and upper estimated number of adult breeding pairs from a given colony that may utilise the marine IBA. Note, the lower population estimate represents the lowest estimated number of breeding pairs from a given colony contributing to the delineation of the marine IBA site. The lower population estimate may therefore be zero when only part of the individual colony(ies) density distribution surface contributed to the marine IBA. *The Count Year for the median population estimate indicates the number of yearly population assessments for the given colony. Colony names are given in the ‘Colony Codes’ table at the end of this document.

| Site code | Species | Colony | Count type | Lower | Upper | Count year* |
| --- | --- | --- | --- | --- | --- | --- |
| 26 | EMP | RAGN | min | 2568 | 6870 | 2009 |
| 26 | EMP | RAGN | max | 2568 | 6870 | 2009 |
| 26 | EMP | RAGN | median | 2568 | 6870 | 1 |
| 26 | EMP | RAGN | recent | 2568 | 6870 | 2009 |

# Antarctica marine IBA: 27

| Site code | 27 |
| --- | --- |
| Species | EMP |
| IBA criteria | A4: Congregations |
| Decimal Latitude | -68.404 |
| Decimal Longitude | 34.508 |
| Area (ha) | 615034 |
| Area (km2) | 6150.34 |
| MPA Overlap |  |
| MPA Type | NA |
| MPA Zones |  |


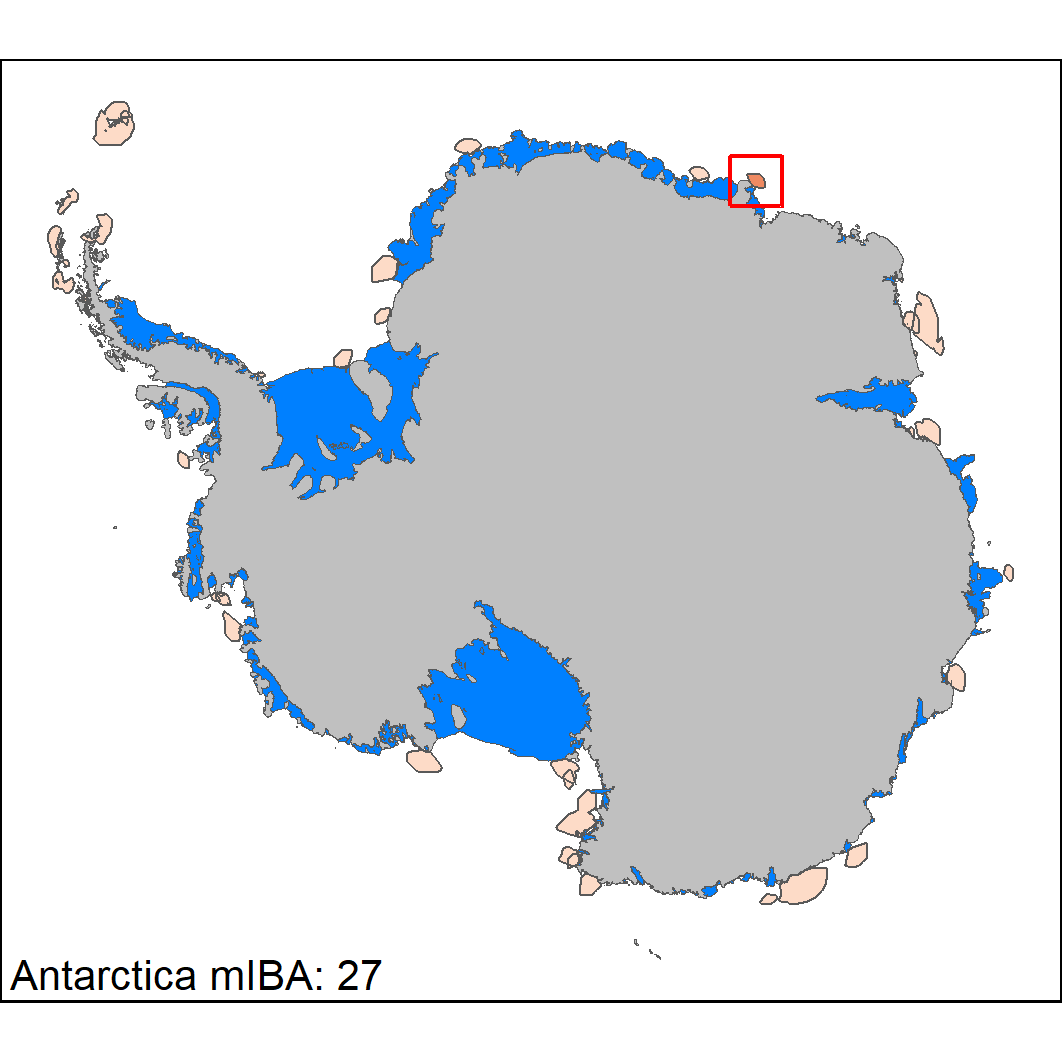


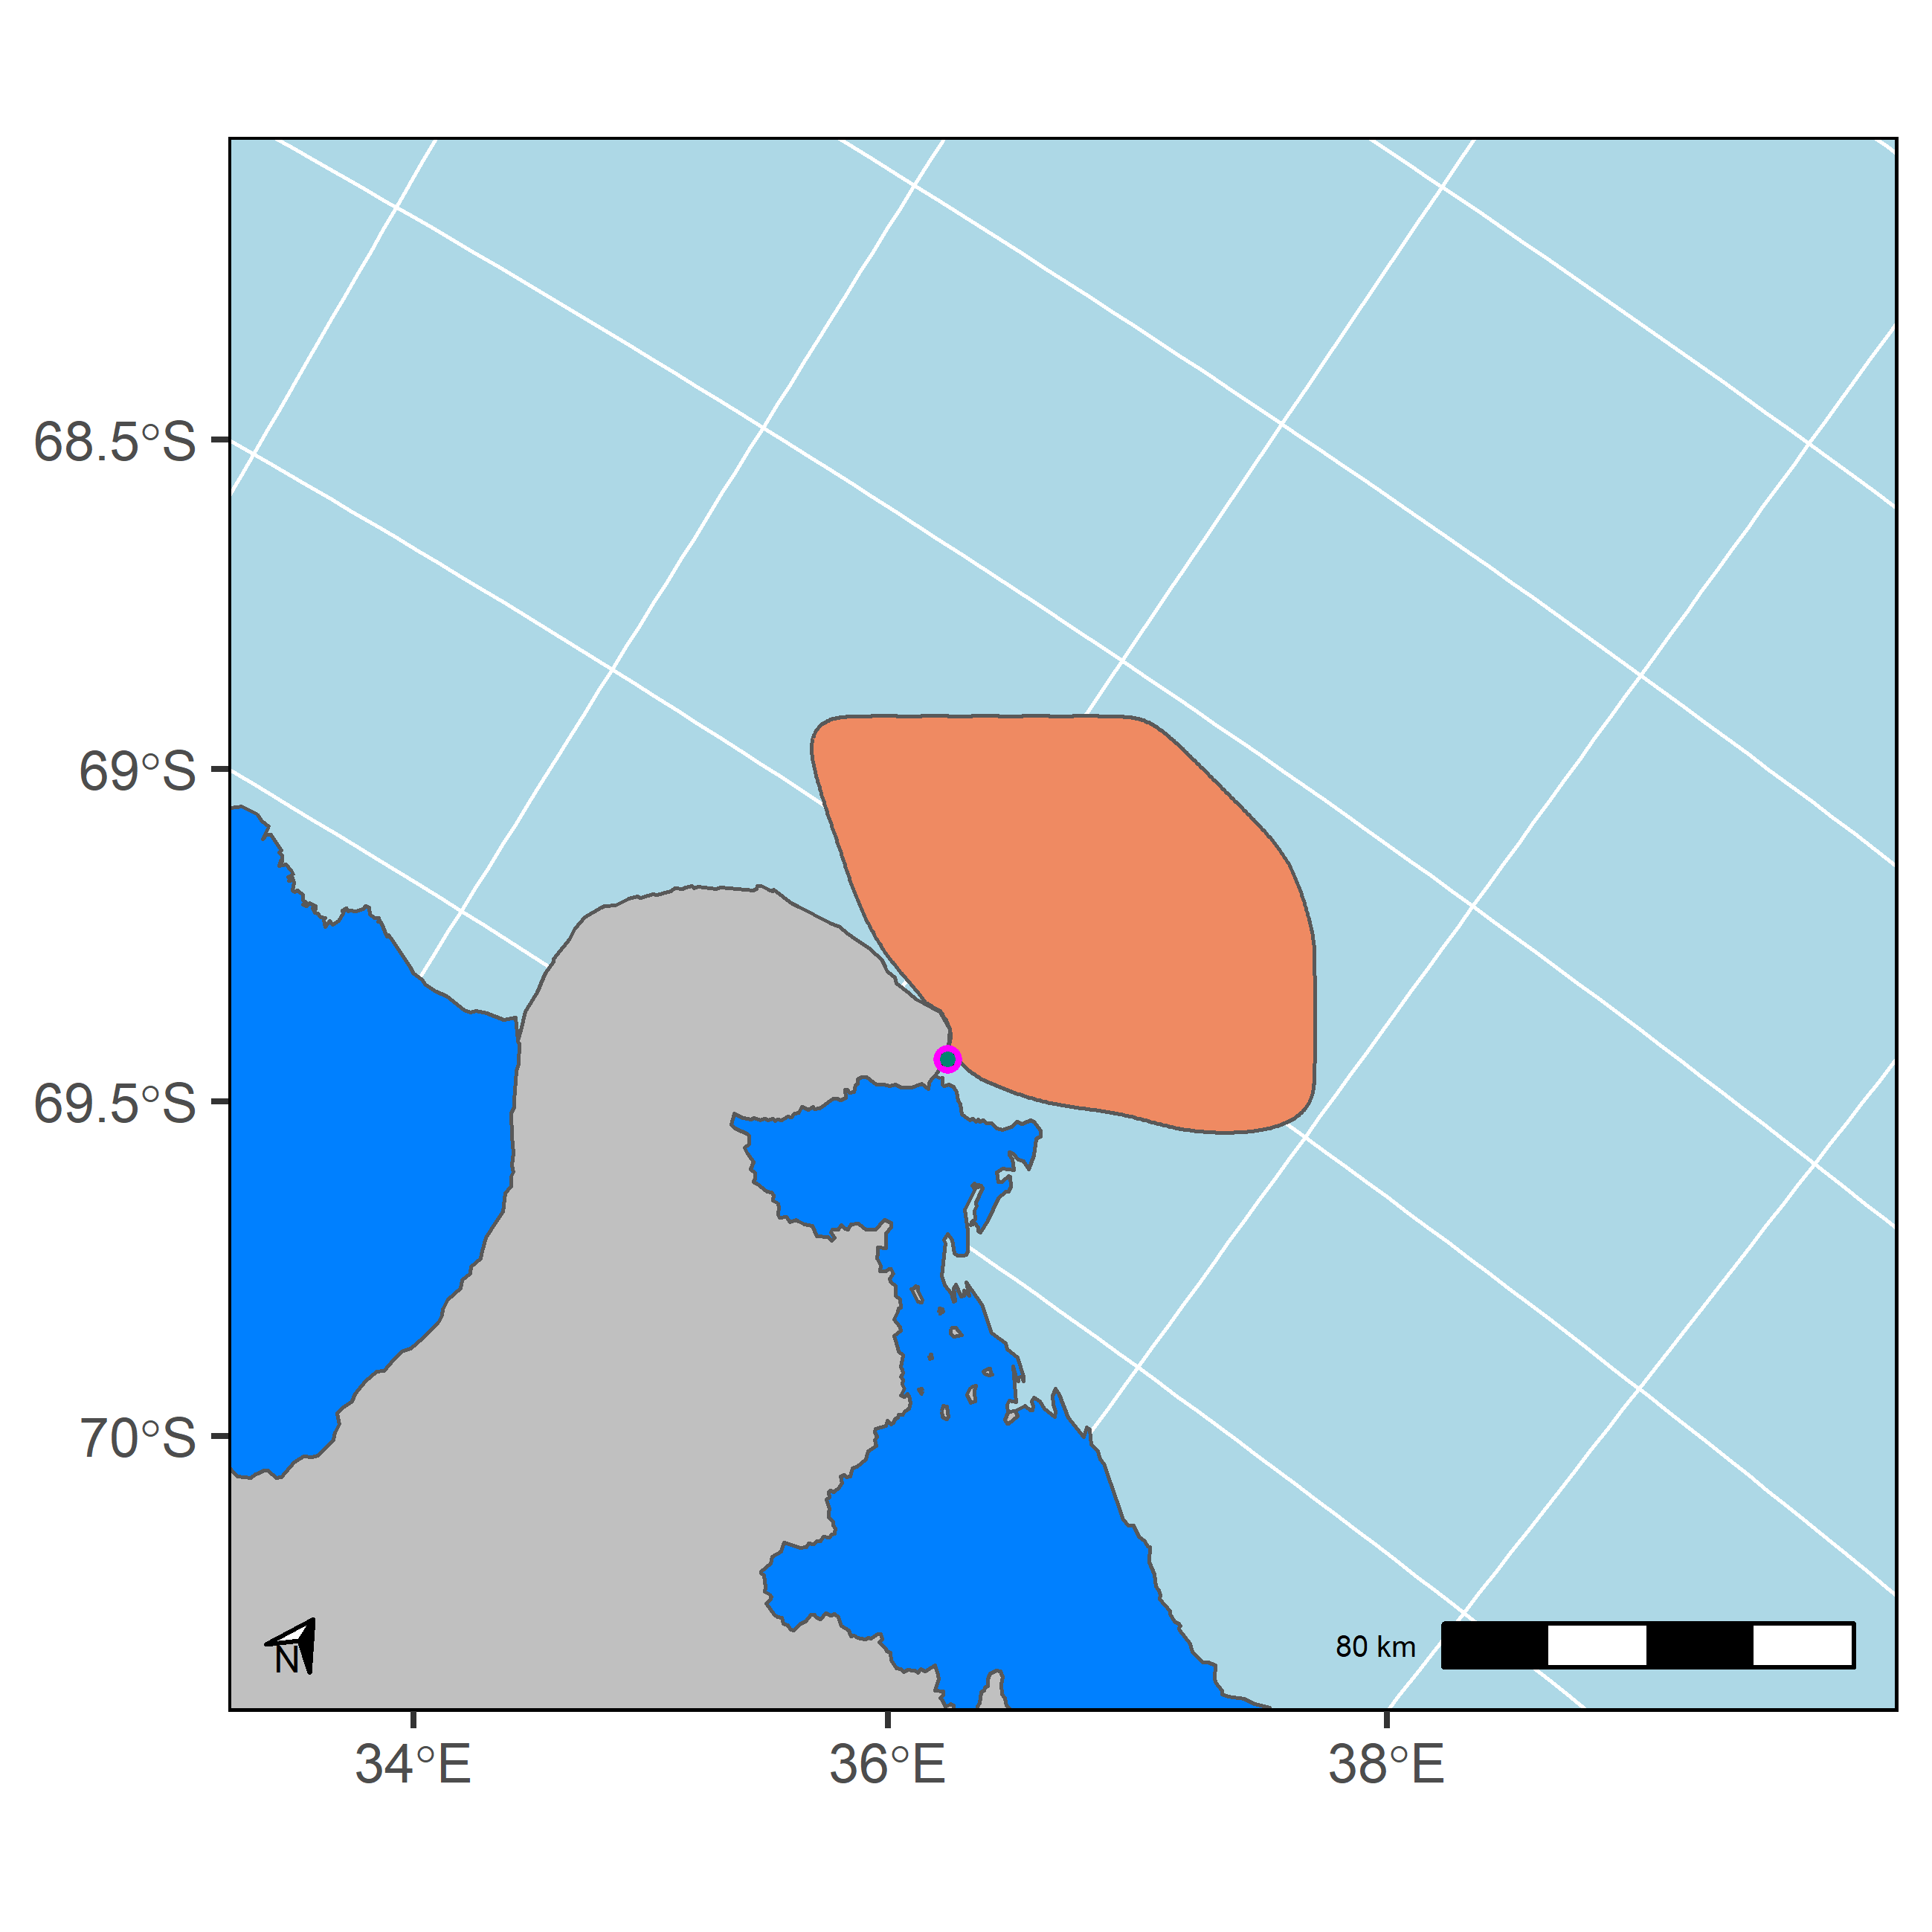


Figure A27.1: Focal Antarctica marine IBA 27 (orange polygon) for penguins, and other marine IBAs (light orange) for penguins identified during the project. Colonies circled in purple are those whose populations contributed to the marine IBA triggering IBA criteria A4 (>1% of the global population). See Table A27.2.

Table A27.1: Population estimates and count types (those that triggered IBA Criteria A4, >1% of global population) for key penguin species in Antarctic marine IBA 27. Key sources of colony input data associated with this marine IBA are detailed in Table A27.2. Population estimates refer to the lower and upper estimated number of adult breeding pairs likely to be using the marine IBA; derived from summing over all cells from individual colony density distribution surfaces which contributed to the identification of the marine IBA.

| Site code | Species | Count type | Lower | Upper |
| --- | --- | --- | --- | --- |
| 27 | EMP | min | 2568 | 4652 |
| 27 | EMP | max | 2568 | 4652 |
| 27 | EMP | median | 2568 | 4652 |
| 27 | EMP | recent | 2568 | 4652 |

Table A27.2: Population estimates (adult breeding pairs) and count types from individual colony(ies) density distribution surfaces which contributed to the identification of marine IBA: 27. I.e. The lower and upper estimated number of adult breeding pairs from a given colony that may utilise the marine IBA. Note, the lower population estimate represents the lowest estimated number of breeding pairs from a given colony contributing to the delineation of the marine IBA site. The lower population estimate may therefore be zero when only part of the individual colony(ies) density distribution surface contributed to the marine IBA. *The Count Year for the median population estimate indicates the number of yearly population assessments for the given colony. Colony names are given in the ‘Colony Codes’ table at the end of this document.

| Site code | Species | Colony | Count type | Lower | Upper | Count year* |
| --- | --- | --- | --- | --- | --- | --- |
| 27 | EMP | GUNN | min | 2568 | 4652 | 2009 |
| 27 | EMP | GUNN | max | 2568 | 4652 | 2009 |
| 27 | EMP | GUNN | median | 2568 | 4652 | 1 |
| 27 | EMP | GUNN | recent | 2568 | 4652 | 2009 |

# Antarctica marine IBA: 28

| Site code | 28 |
| --- | --- |
| Species | EMP |
| IBA criteria | A4: Congregations |
| Decimal Latitude | -66.587 |
| Decimal Longitude | 57.429 |
| Area (ha) | 30432.31 |
| Area (km2) | 304.3231 |
| MPA Overlap |  |
| MPA Type | NA |
| MPA Zones |  |


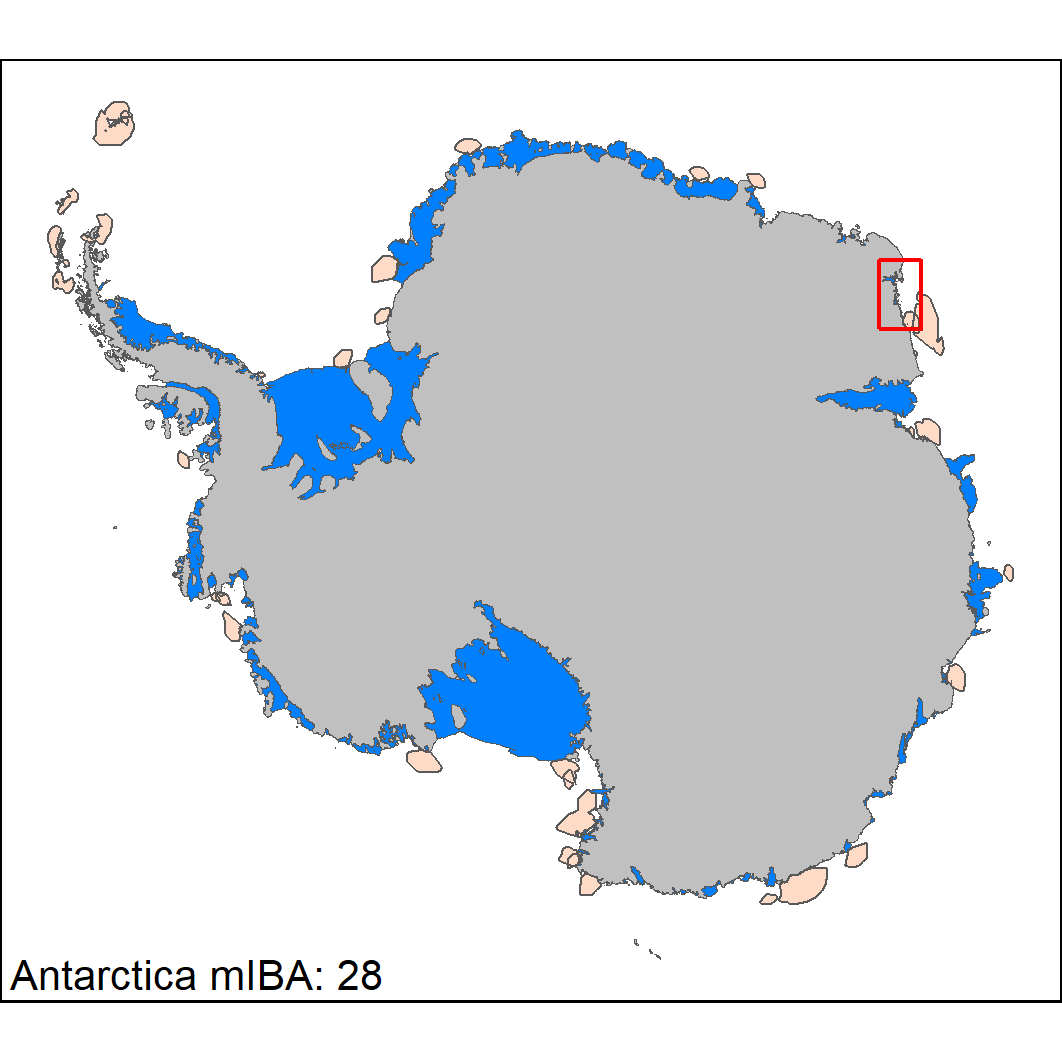


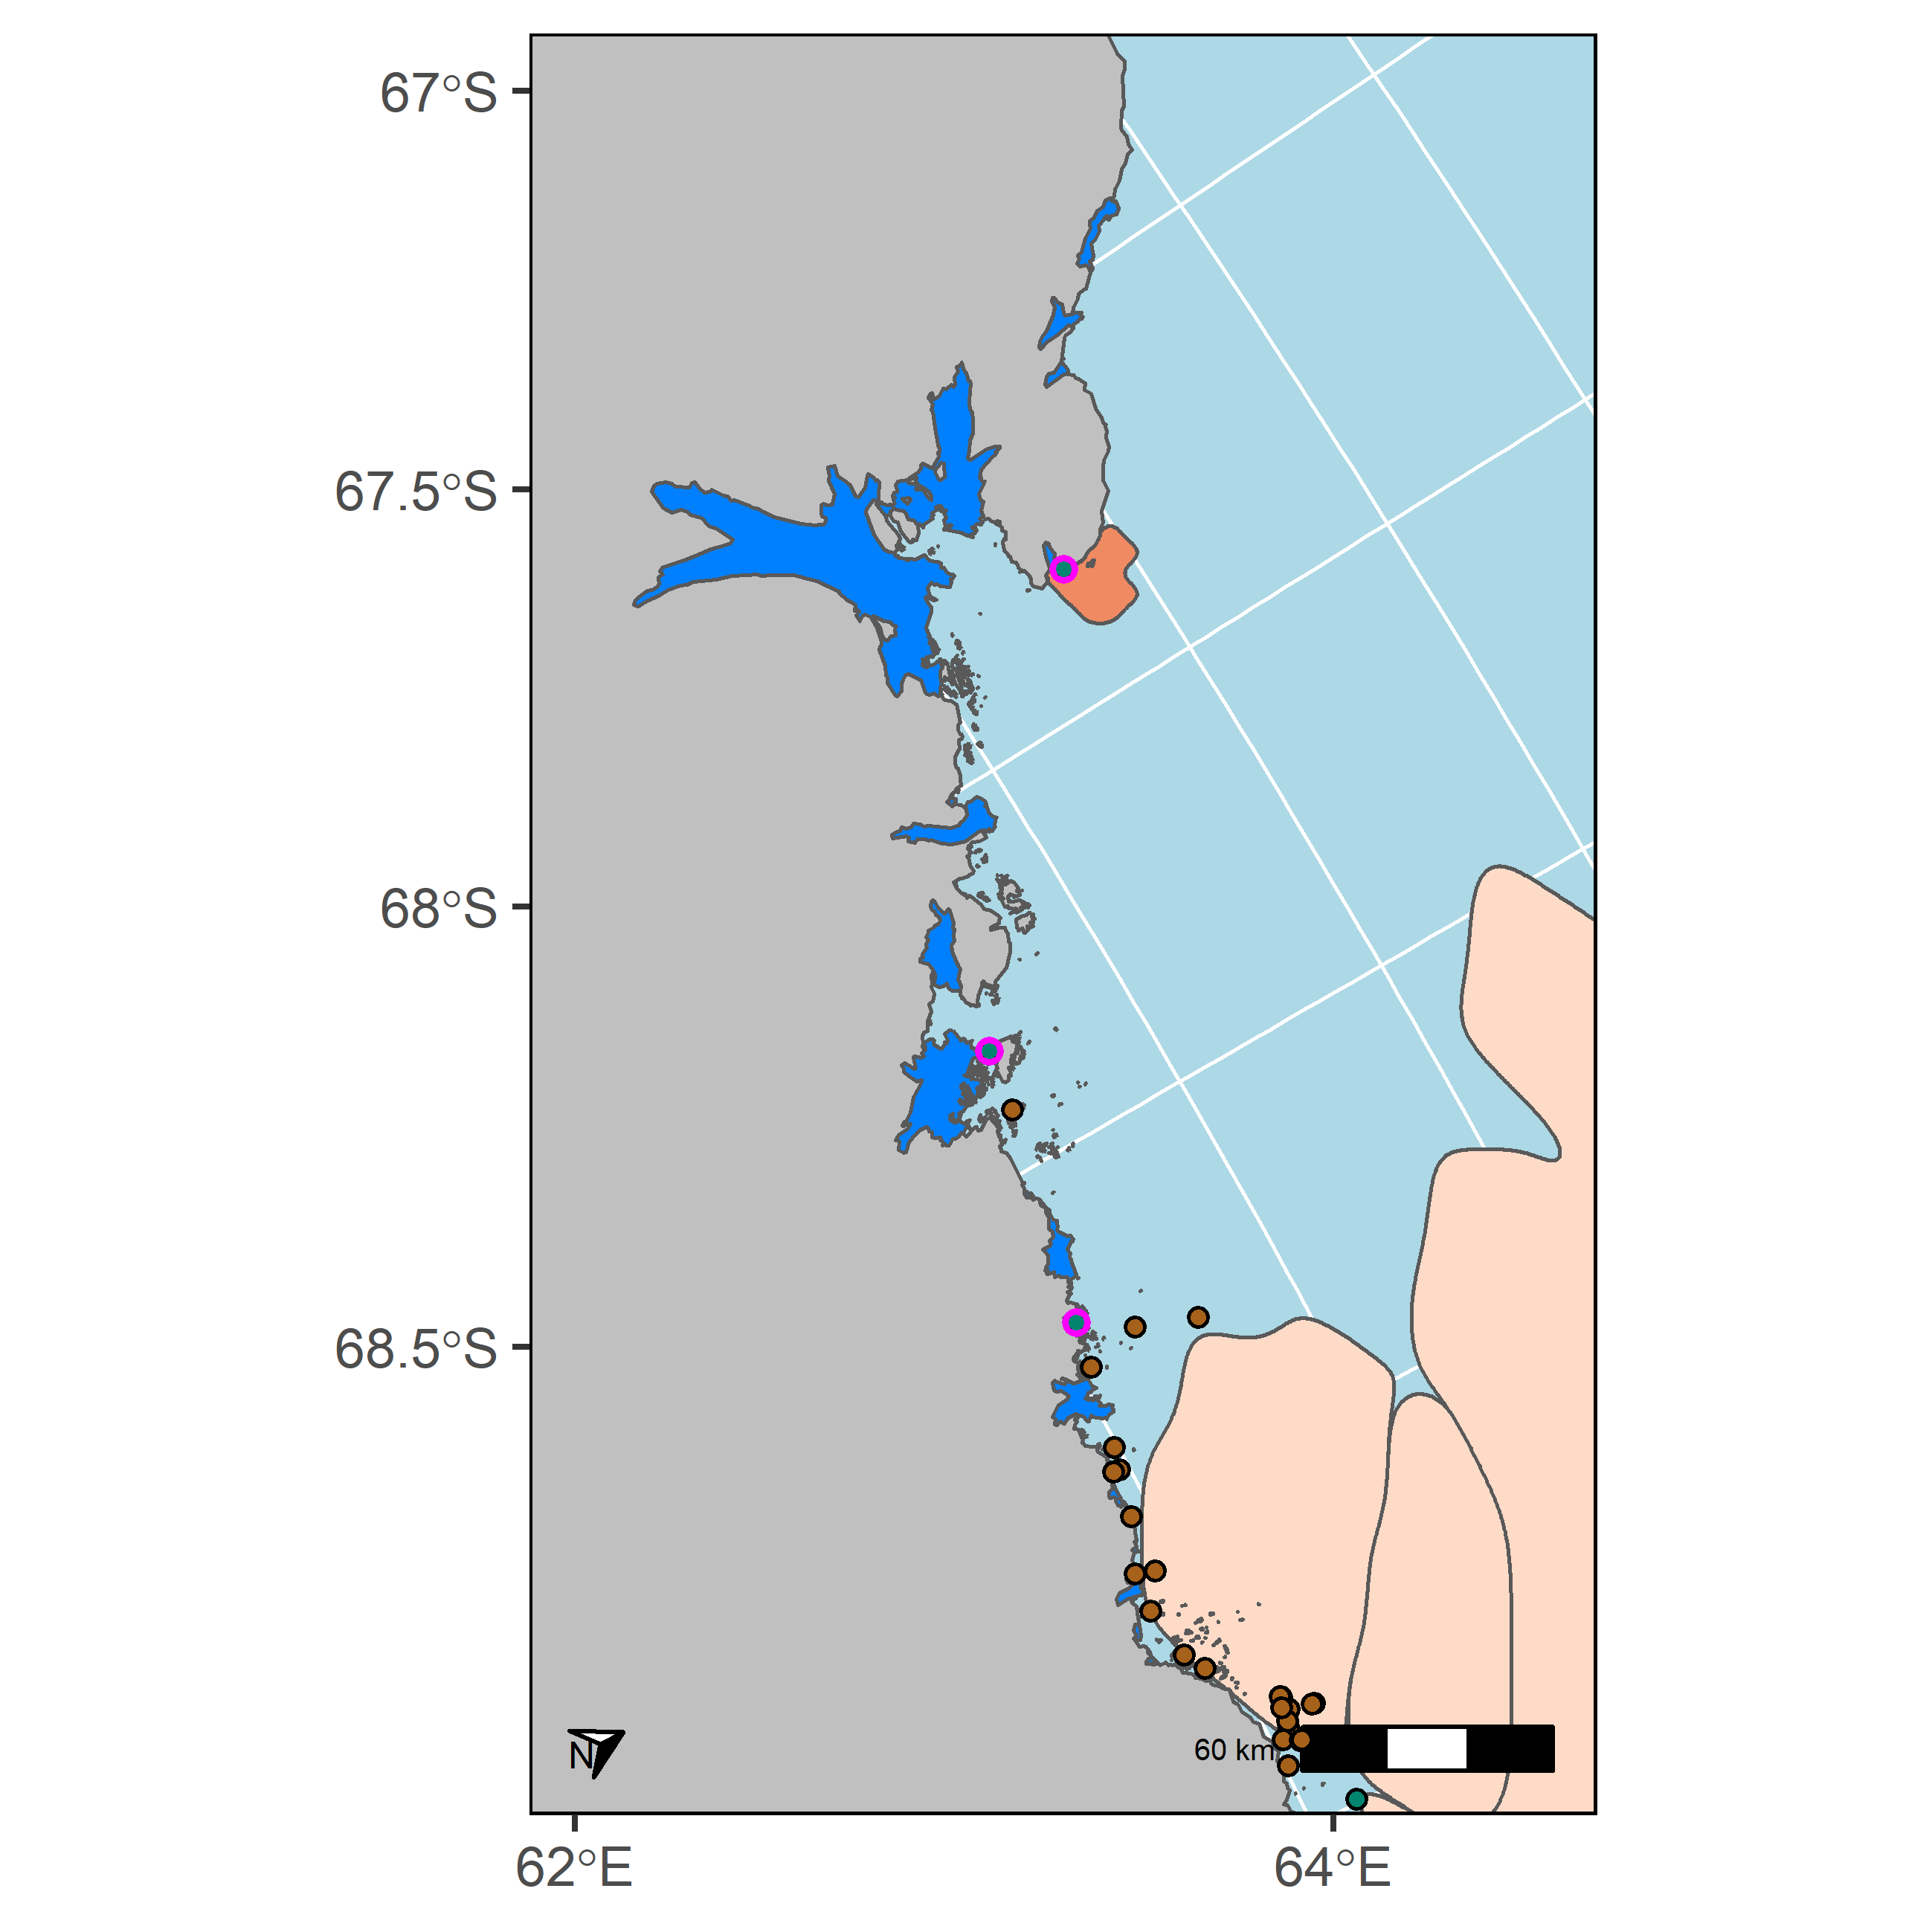


Figure A28.1: Focal Antarctica marine IBA 28 (orange polygon) for penguins, and other marine IBAs (light orange) for penguins identified during the project. Colonies circled in purple are those whose populations contributed to the marine IBA triggering IBA criteria A4 (>1% of the global population). See Table A28.2.

Table A28.1: Population estimates and count types (those that triggered IBA Criteria A4, >1% of global population) for key penguin species in Antarctic marine IBA 28. Key sources of colony input data associated with this marine IBA are detailed in Table A28.2. Population estimates refer to the lower and upper estimated number of adult breeding pairs likely to be using the marine IBA; derived from summing over all cells from individual colony density distribution surfaces which contributed to the identification of the marine IBA.

| Site code | Species | Count type | Lower | Upper |
| --- | --- | --- | --- | --- |
| 28 | EMP | min | 2568 | 3362 |
| 28 | EMP | max | 2722 | 3531 |
| 28 | EMP | median | 2722 | 3362 |
| 28 | EMP | recent | 2568 | 3362 |

Table A28.2: Population estimates (adult breeding pairs) and count types from individual colony(ies) density distribution surfaces which contributed to the identification of marine IBA: 28. I.e. The lower and upper estimated number of adult breeding pairs from a given colony that may utilise the marine IBA. Note, the lower population estimate represents the lowest estimated number of breeding pairs from a given colony contributing to the delineation of the marine IBA site. The lower population estimate may therefore be zero when only part of the individual colony(ies) density distribution surface contributed to the marine IBA. *The Count Year for the median population estimate indicates the number of yearly population assessments for the given colony. Colony names are given in the ‘Colony Codes’ table at the end of this document.

| Site code | Species | Colony | Count type | Lower | Upper | Count year* |
| --- | --- | --- | --- | --- | --- | --- |
| 28 | EMP | FOLD | min | 75 | 85 | 2009 |
| 28 | EMP | FOLD | max | 75 | 85 | 2009 |
| 28 | EMP | FOLD | median | 75 | 85 | 1 |
| 28 | EMP | FOLD | recent | 75 | 85 | 2009 |
| 28 | EMP | KLOA | min | 2359 | 3283 | 2009 |
| 28 | EMP | KLOA | max | 2359 | 3283 | 2009 |
| 28 | EMP | KLOA | median | 2359 | 3283 | 1 |
| 28 | EMP | KLOA | recent | 2359 | 3283 | 2009 |
| 28 | EMP | TAYG | min | 119 | 148 | 2009 |
| 28 | EMP | TAYG | max | 666 | 825 | 1988 |
| 28 | EMP | TAYG | median | 396 | 491 | 3 |
| 28 | EMP | TAYG | recent | 119 | 148 | 2009 |

# Antarctica marine IBA: 29

| Site code | 29 |
| --- | --- |
| Species | ADP |
| IBA criteria | A4: Congregations |
| Decimal Latitude | -67.283 |
| Decimal Longitude | 62.374 |
| Area (ha) | 477257.4 |
| Area (km2) | 4772.574 |
| MPA Overlap | EARSMPA |
| MPA Type | Proposed |
| MPA Zones | MacRobertson MPA |


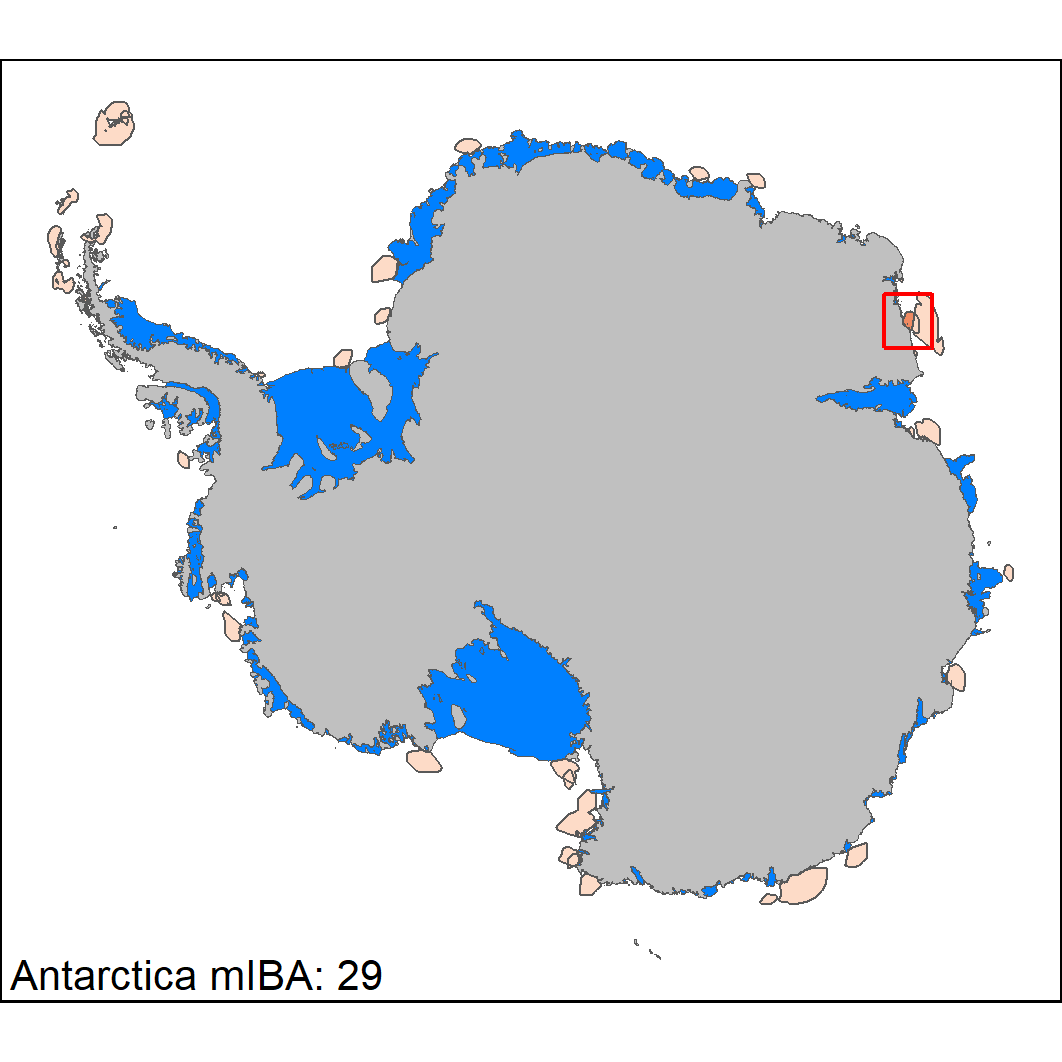


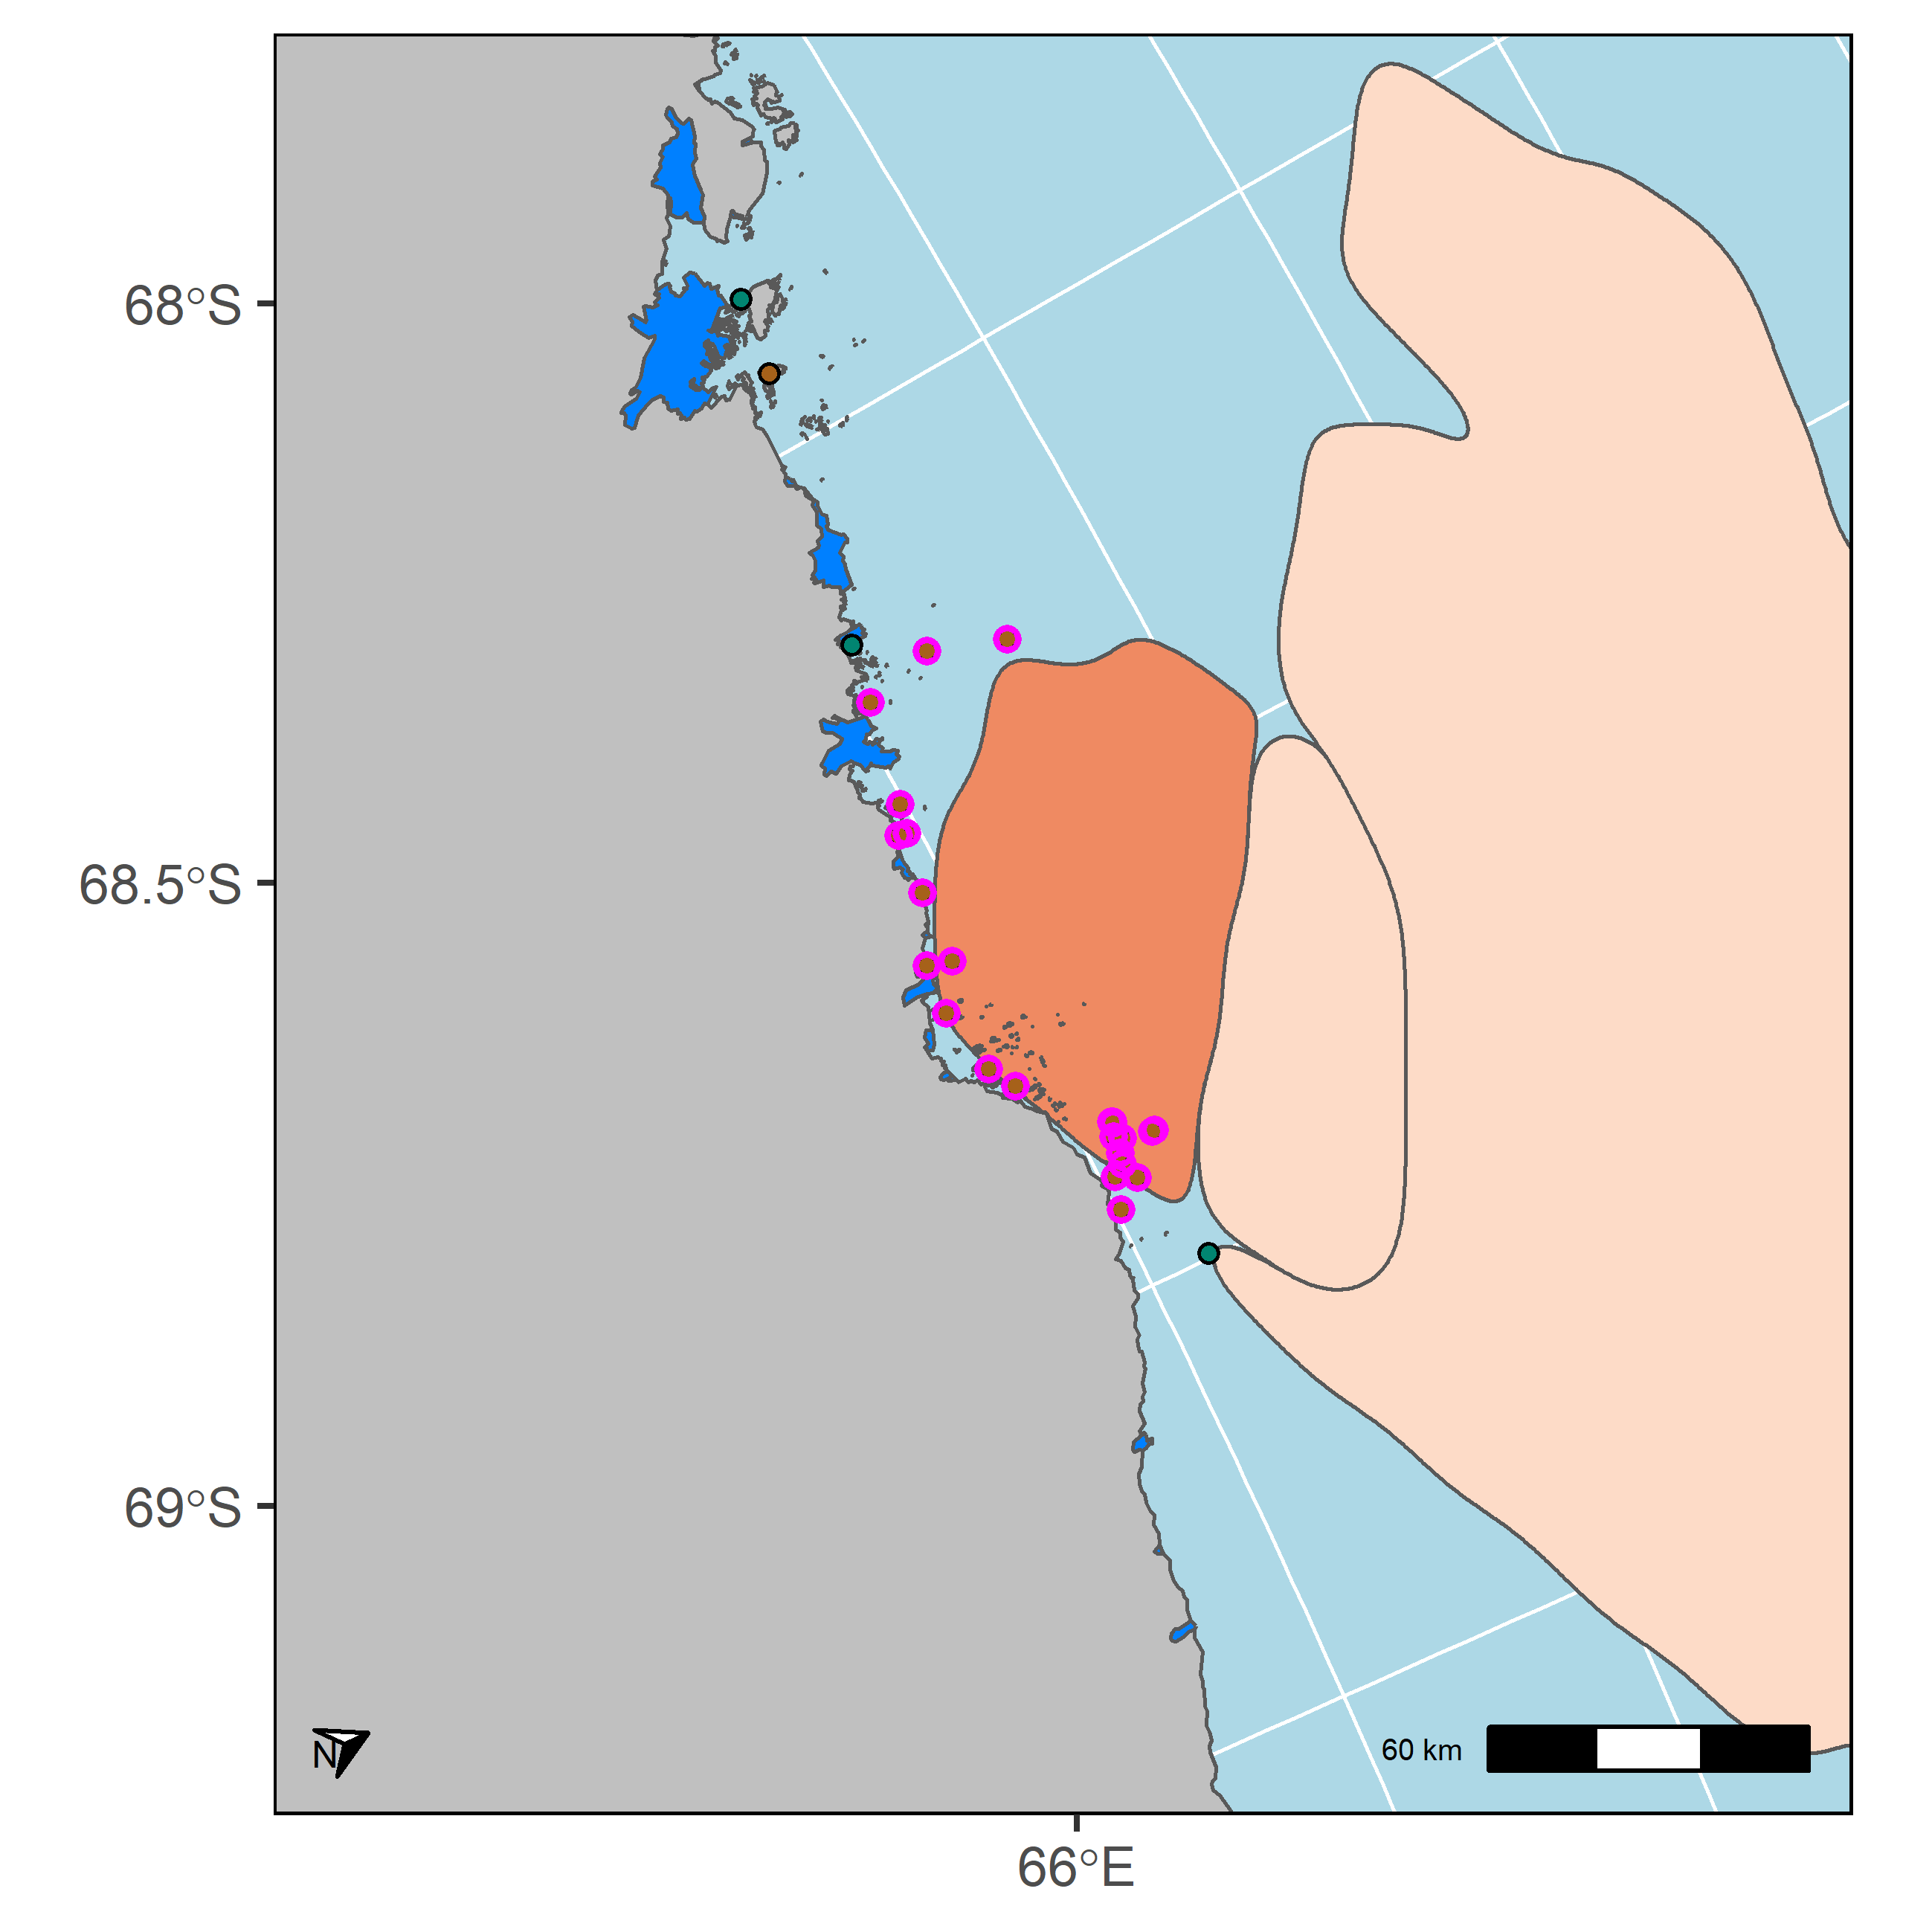


Figure A29.1: Focal Antarctica marine IBA 29 (orange polygon) for penguins, and other marine IBAs (light orange) for penguins identified during the project. Colonies circled in purple are those whose populations contributed to the marine IBA triggering IBA criteria A4 (>1% of the global population). See Table A29.2.

Table A29.1: Population estimates and count types (those that triggered IBA Criteria A4, >1% of global population) for key penguin species in Antarctic marine IBA 29. Key sources of colony input data associated with this marine IBA are detailed in Table A29.2. Population estimates refer to the lower and upper estimated number of adult breeding pairs likely to be using the marine IBA; derived from summing over all cells from individual colony density distribution surfaces which contributed to the identification of the marine IBA.

| Site code | Species | Count type | Lower | Upper |
| --- | --- | --- | --- | --- |
| 29 | ADP | max | 39021 | 86306 |
| 29 | ADP | median | 38315 | 83140 |
| 29 | ADP | recent | 37918 | 81522 |

Table A29.2: Population estimates (adult breeding pairs) and count types from individual colony(ies) density distribution surfaces which contributed to the identification of marine IBA: 29. I.e. The lower and upper estimated number of adult breeding pairs from a given colony that may utilise the marine IBA. Note, the lower population estimate represents the lowest estimated number of breeding pairs from a given colony contributing to the delineation of the marine IBA site. The lower population estimate may therefore be zero when only part of the individual colony(ies) density distribution surface contributed to the marine IBA. *The Count Year for the median population estimate indicates the number of yearly population assessments for the given colony. Colony names are given in the ‘Colony Codes’ table at the end of this document.

| Site code | Species | Colony | Count type | Lower | Upper | Count year* |
| --- | --- | --- | --- | --- | --- | --- |
| 29 | ADP | ANDS | max | 769 | 5000 | 2005 |
| 29 | ADP | ANDS | median | 769 | 5000 | 1 |
| 29 | ADP | ANDS | recent | 769 | 5000 | 2005 |
| 29 | ADP | BECH | max | 476 | 2207 | 2001 |
| 29 | ADP | BECH | median | 395 | 1832 | 12 |
| 29 | ADP | BECH | recent | 476 | 2207 | 2001 |
| 29 | ADP | CHI1 | max | 86 | 500 | 2005 |
| 29 | ADP | CHI1 | median | 86 | 500 | 1 |
| 29 | ADP | CHI1 | recent | 86 | 500 | 2005 |
| 29 | ADP | CHI2 | max | 851 | 5000 | 2005 |
| 29 | ADP | CHI2 | median | 851 | 5000 | 1 |
| 29 | ADP | CHI2 | recent | 851 | 5000 | 2005 |
| 29 | ADP | CHI3 | max | 86 | 500 | 2005 |
| 29 | ADP | CHI3 | median | 86 | 500 | 1 |
| 29 | ADP | CHI3 | recent | 86 | 500 | 2005 |
| 29 | ADP | COLB | max | 299 | 653 | 2011 |
| 29 | ADP | COLB | median | 299 | 653 | 1 |
| 29 | ADP | COLB | recent | 299 | 653 | 2011 |
| 29 | ADP | DOU1 | max | 8 | 50 | 2005 |
| 29 | ADP | DOU1 | median | 8 | 50 | 1 |
| 29 | ADP | DOU1 | recent | 8 | 50 | 2005 |
| 29 | ADP | DOU2 | max | 83 | 500 | 2005 |
| 29 | ADP | DOU2 | median | 83 | 500 | 1 |
| 29 | ADP | DOU2 | recent | 83 | 500 | 2005 |
| 29 | ADP | FORB | max | 522 | 1735 | 2008 |
| 29 | ADP | FORB | median | 393 | 1307 | 2 |
| 29 | ADP | FORB | recent | 264 | 878 | 2011 |
| 29 | ADP | GNEY | max | 3496 | 12246 | 2011 |
| 29 | ADP | GNEY | median | 3496 | 12246 | 1 |
| 29 | ADP | GNEY | recent | 3496 | 12246 | 2011 |
| 29 | ADP | KIDS | max | 512 | 1128 | 2011 |
| 29 | ADP | KIDS | median | 447 | 986 | 2 |
| 29 | ADP | KIDS | recent | 512 | 1128 | 2011 |
| 29 | ADP | KIRT | max | 1024 | 9949 | 2006 |
| 29 | ADP | KIRT | median | 1024 | 9949 | 1 |
| 29 | ADP | KIRT | recent | 1024 | 9949 | 2006 |
| 29 | ADP | LOWT | max | 1151 | 3113 | 2008 |
| 29 | ADP | LOWT | median | 1151 | 3113 | 1 |
| 29 | ADP | LOWT | recent | 1151 | 3113 | 2008 |
| 29 | ADP | MAWS | max | 8949 | 39691 | 2011 |
| 29 | ADP | MAWS | median | 8949 | 39691 | 1 |
| 29 | ADP | MAWS | recent | 8949 | 39691 | 2011 |
| 29 | ADP | OLDH | max | 1177 | 2914 | 2008 |
| 29 | ADP | OLDH | median | 1177 | 2914 | 1 |
| 29 | ADP | OLDH | recent | 1177 | 2914 | 2008 |
| 29 | ADP | RBSN | max | 760 | 5000 | 2005 |
| 29 | ADP | RBSN | median | 426 | 2804 | 2 |
| 29 | ADP | RBSN | recent | 93 | 609 | 2006 |
| 29 | ADP | RONW | max | 17 | 111 | 2006 |
| 29 | ADP | RONW | median | 17 | 111 | 1 |
| 29 | ADP | RONW | recent | 17 | 111 | 2006 |
| 29 | ADP | ROOK | max | 11827 | 44800 | 1988 |
| 29 | ADP | ROOK | median | 11720 | 44394 | 2 |
| 29 | ADP | ROOK | recent | 11613 | 43989 | 2011 |
| 29 | ADP | ROSE | max | 83 | 709 | 2006 |
| 29 | ADP | ROSE | median | 68 | 576 | 2 |
| 29 | ADP | ROSE | recent | 83 | 709 | 2006 |
| 29 | ADP | STAN | max | 987 | 2402 | 2008 |
| 29 | ADP | STAN | median | 987 | 2402 | 1 |
| 29 | ADP | STAN | recent | 987 | 2402 | 2008 |
| 29 | ADP | STUN | max | 242 | 621 | 2008 |
| 29 | ADP | STUN | median | 242 | 621 | 1 |
| 29 | ADP | STUN | recent | 242 | 621 | 2008 |
| 29 | ADP | THOR | max | 642 | 4237 | 2005 |
| 29 | ADP | THOR | median | 380 | 2506 | 2 |
| 29 | ADP | THOR | recent | 118 | 777 | 2006 |
| 29 | ADP | UFSI | max | 595 | 1358 | 2008 |
| 29 | ADP | UFSI | median | 548 | 1252 | 2 |
| 29 | ADP | UFSI | recent | 502 | 1146 | 2009 |
| 29 | ADP | UNN7 | max | 945 | 5669 | 2011 |
| 29 | ADP | UNN7 | median | 945 | 5669 | 1 |
| 29 | ADP | UNN7 | recent | 945 | 5669 | 2011 |

# Antarctica marine IBA: 30

| Site code | 30 |
| --- | --- |
| Species | ADP,EMP |
| IBA criteria | A4: Congregations |
| Decimal Latitude | -67.076 |
| Decimal Longitude | 63.335 |
| Area (ha) | 318885 |
| Area (km2) | 3188.85 |
| MPA Overlap | EARSMPA |
| MPA Type | Proposed |
| MPA Zones | MacRobertson MPA |


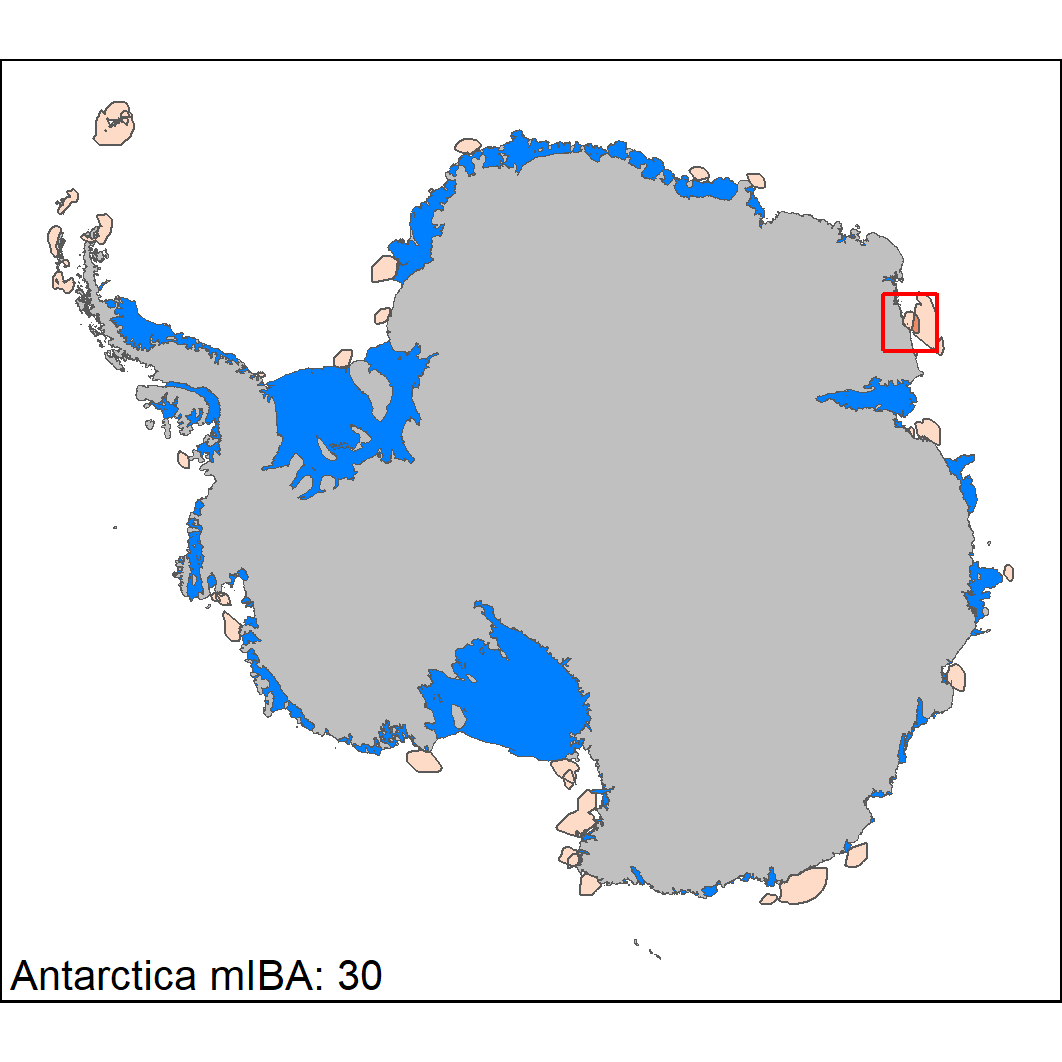


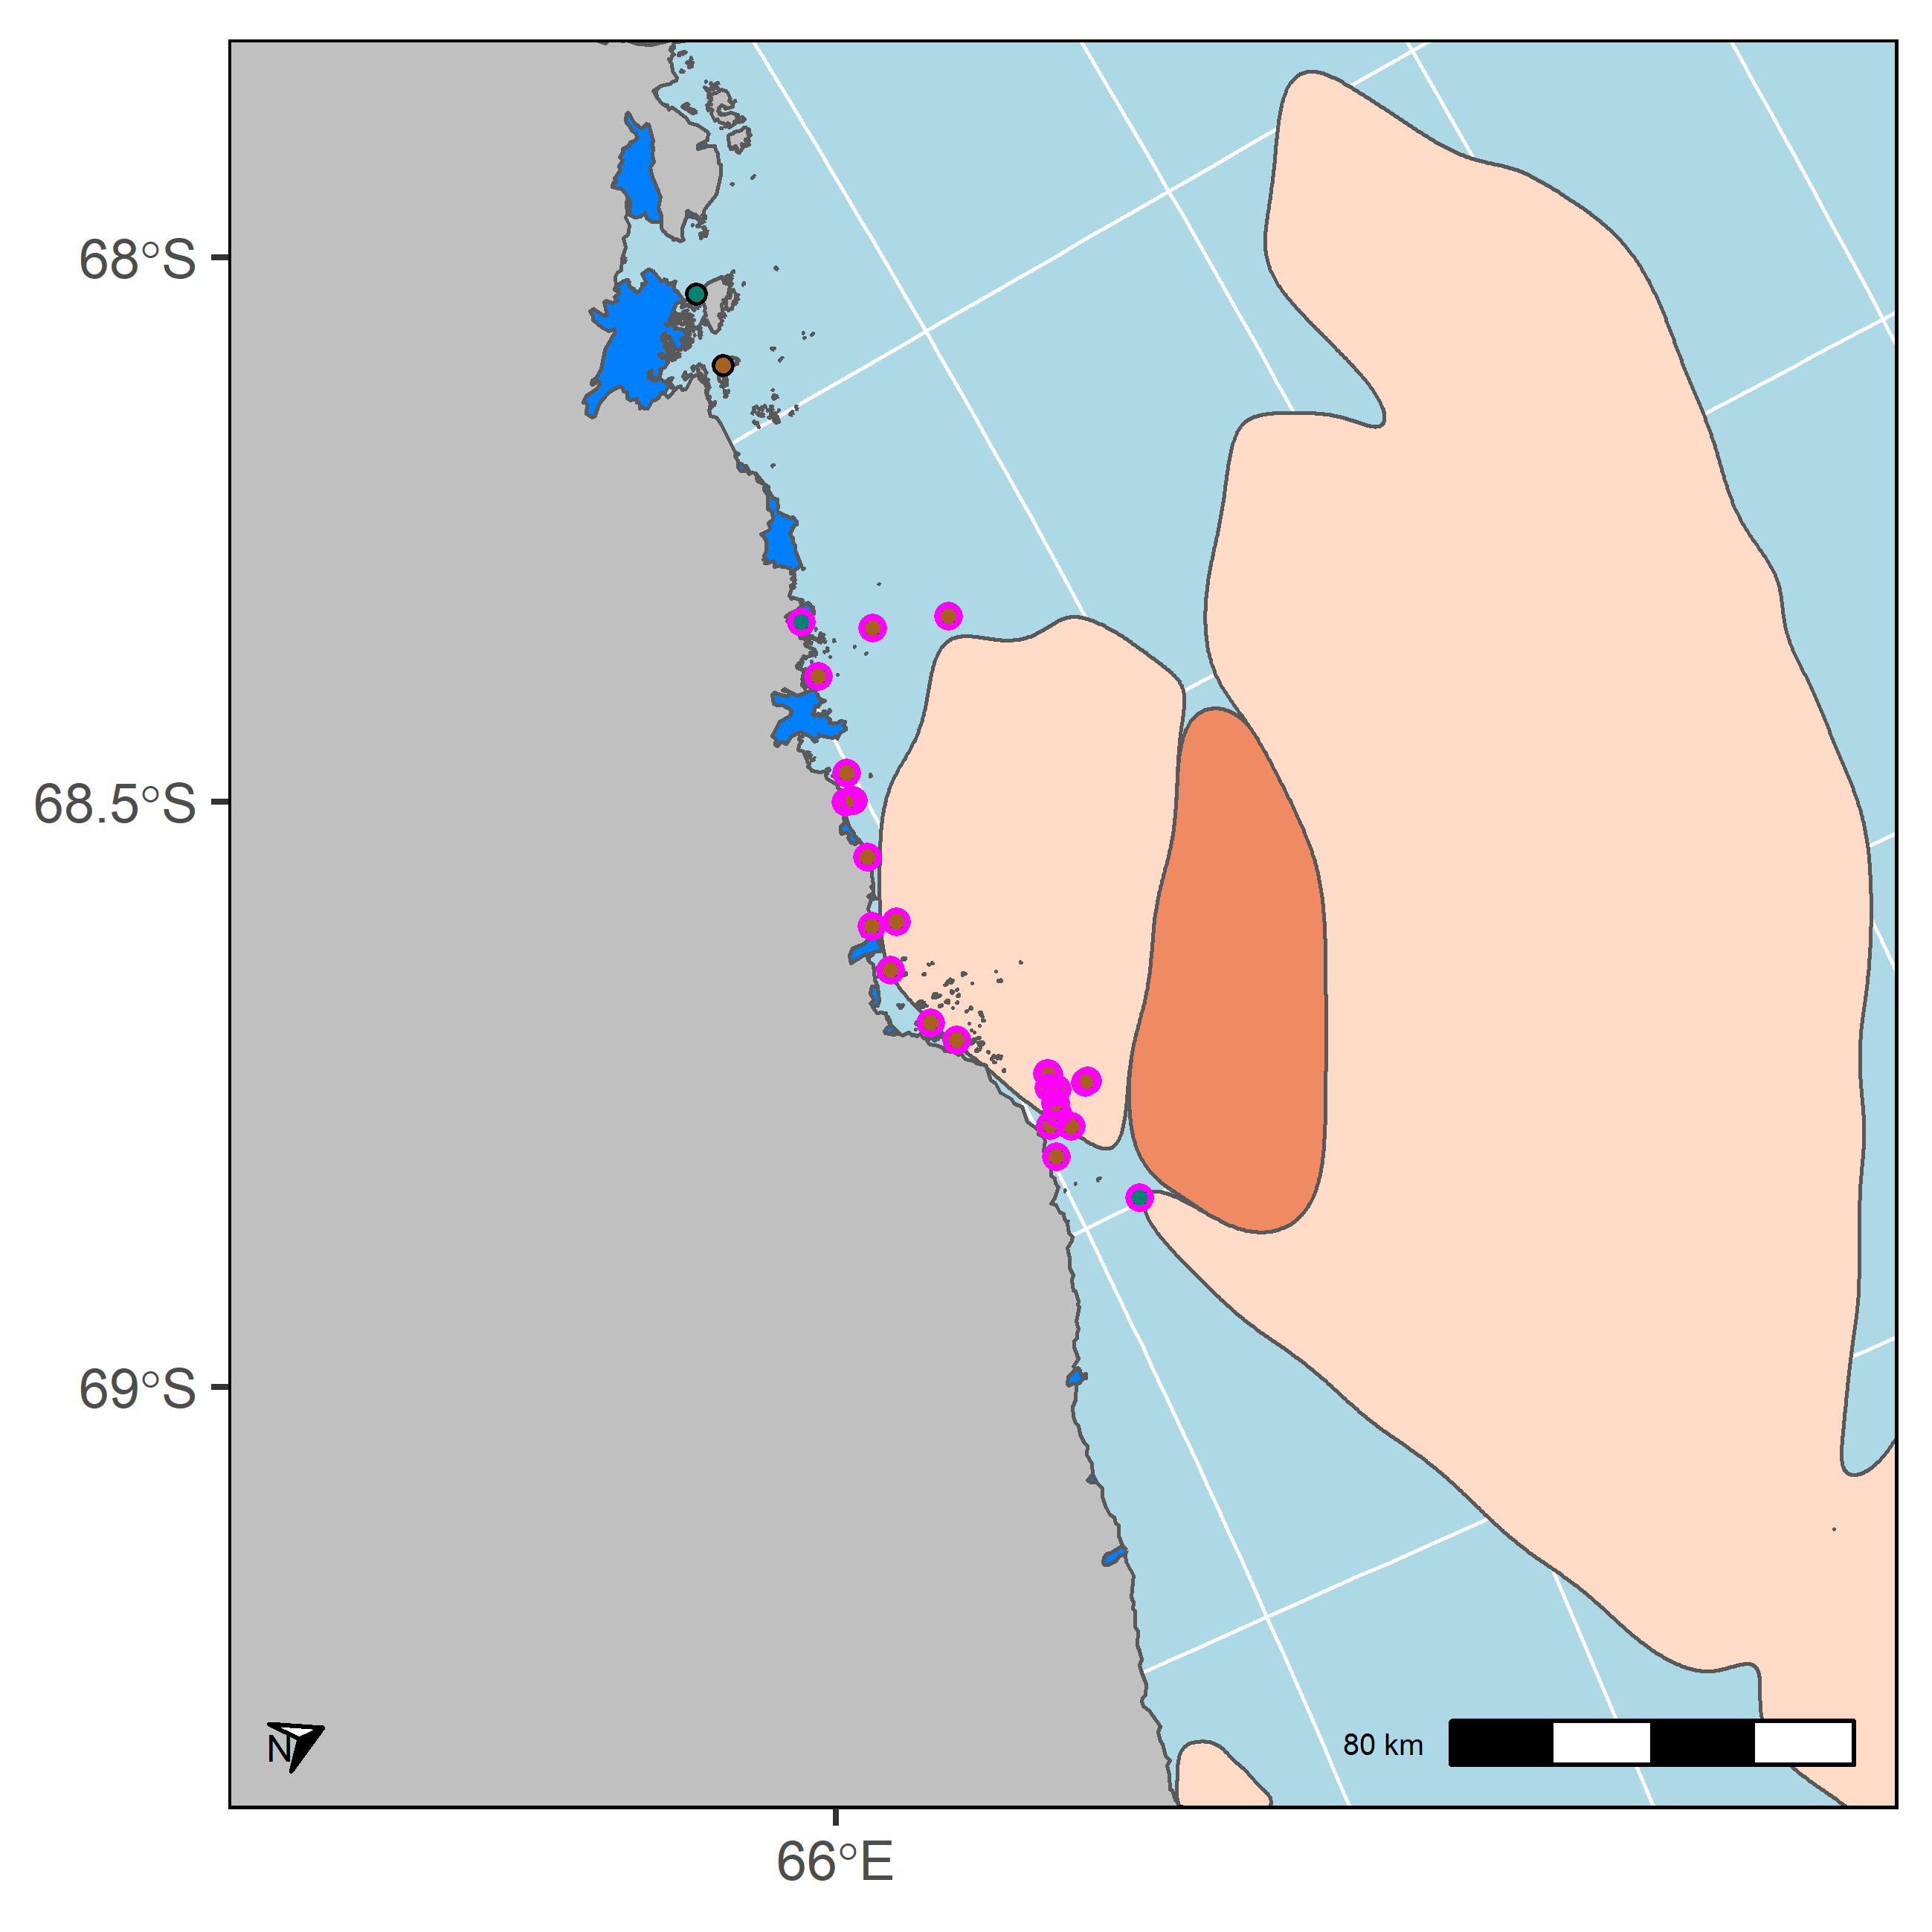


Figure A30.1: Focal Antarctica marine IBA 30 (orange polygon) for penguins, and other marine IBAs (light orange) for penguins identified during the project. Colonies circled in purple are those whose populations contributed to the marine IBA triggering IBA criteria A4 (>1% of the global population). See Table A30.2.

Table A30.1: Population estimates and count types (those that triggered IBA Criteria A4, >1% of global population) for key penguin species in Antarctic marine IBA 30. Key sources of colony input data associated with this marine IBA are detailed in Table A30.2. Population estimates refer to the lower and upper estimated number of adult breeding pairs likely to be using the marine IBA; derived from summing over all cells from individual colony density distribution surfaces which contributed to the identification of the marine IBA.

| Site code | Species | Count type | Lower | Upper |
| --- | --- | --- | --- | --- |
| 30 | ADP | max | 40504 | 74994 |
| 30 | ADP | median | 39126 | 71630 |
| 30 | ADP | recent | 38111 | 68824 |
| 30 | EMP | min | 3594 | 6537 |
| 30 | EMP | max | 5901 | 9154 |
| 30 | EMP | median | 5527 | 9154 |
| 30 | EMP | recent | 3594 | 6537 |

Table A30.2: Population estimates (adult breeding pairs) and count types from individual colony(ies) density distribution surfaces which contributed to the identification of marine IBA: 30. I.e. The lower and upper estimated number of adult breeding pairs from a given colony that may utilise the marine IBA. Note, the lower population estimate represents the lowest estimated number of breeding pairs from a given colony contributing to the delineation of the marine IBA site. The lower population estimate may therefore be zero when only part of the individual colony(ies) density distribution surface contributed to the marine IBA. *The Count Year for the median population estimate indicates the number of yearly population assessments for the given colony. Colony names are given in the ‘Colony Codes’ table at the end of this document.

| Site code | Species | Colony | Count type | Lower | Upper | Count year* |
| --- | --- | --- | --- | --- | --- | --- |
| 30 | ADP | ANDS | max | 1298 | 3407 | 2005 |
| 30 | ADP | ANDS | median | 1298 | 3407 | 1 |
| 30 | ADP | ANDS | recent | 1298 | 3407 | 2005 |
| 30 | ADP | AUST | max | 270 | 1655 | 2006 |
| 30 | ADP | AUST | median | 270 | 1655 | 1 |
| 30 | ADP | AUST | recent | 270 | 1655 | 2006 |
| 30 | ADP | BECH | max | 510 | 1144 | 2001 |
| 30 | ADP | BECH | median | 424 | 950 | 12 |
| 30 | ADP | BECH | recent | 510 | 1144 | 2001 |
| 30 | ADP | CHI1 | max | 132 | 334 | 2005 |
| 30 | ADP | CHI1 | median | 132 | 334 | 1 |
| 30 | ADP | CHI1 | recent | 132 | 334 | 2005 |
| 30 | ADP | CHI2 | max | 1306 | 3313 | 2005 |
| 30 | ADP | CHI2 | median | 1306 | 3313 | 1 |
| 30 | ADP | CHI2 | recent | 1306 | 3313 | 2005 |
| 30 | ADP | CHI3 | max | 131 | 333 | 2005 |
| 30 | ADP | CHI3 | median | 131 | 333 | 1 |
| 30 | ADP | CHI3 | recent | 131 | 333 | 2005 |
| 30 | ADP | COLB | max | 144 | 316 | 2011 |
| 30 | ADP | COLB | median | 144 | 316 | 1 |
| 30 | ADP | COLB | recent | 144 | 316 | 2011 |
| 30 | ADP | DOU1 | max | 11 | 31 | 2005 |
| 30 | ADP | DOU1 | median | 11 | 31 | 1 |
| 30 | ADP | DOU1 | recent | 11 | 31 | 2005 |
| 30 | ADP | DOU2 | max | 117 | 337 | 2005 |
| 30 | ADP | DOU2 | median | 117 | 337 | 1 |
| 30 | ADP | DOU2 | recent | 117 | 337 | 2005 |
| 30 | ADP | FORB | max | 306 | 782 | 2008 |
| 30 | ADP | FORB | median | 230 | 589 | 2 |
| 30 | ADP | FORB | recent | 155 | 396 | 2011 |
| 30 | ADP | GNEY | max | 2119 | 5429 | 2011 |
| 30 | ADP | GNEY | median | 2119 | 5429 | 1 |
| 30 | ADP | GNEY | recent | 2119 | 5429 | 2011 |
| 30 | ADP | KIDS | max | 268 | 562 | 2011 |
| 30 | ADP | KIDS | median | 235 | 492 | 2 |
| 30 | ADP | KIDS | recent | 268 | 562 | 2011 |
| 30 | ADP | KIRT | max | 2343 | 8660 | 2006 |
| 30 | ADP | KIRT | median | 2343 | 8660 | 1 |
| 30 | ADP | KIRT | recent | 2343 | 8660 | 2006 |
| 30 | ADP | LOWT | max | 424 | 1366 | 2008 |
| 30 | ADP | LOWT | median | 424 | 1366 | 1 |
| 30 | ADP | LOWT | recent | 424 | 1366 | 2008 |
| 30 | ADP | MAWS | max | 10440 | 20983 | 2011 |
| 30 | ADP | MAWS | median | 10440 | 20983 | 1 |
| 30 | ADP | MAWS | recent | 10440 | 20983 | 2011 |
| 30 | ADP | OLDH | max | 377 | 1243 | 2008 |
| 30 | ADP | OLDH | median | 377 | 1243 | 1 |
| 30 | ADP | OLDH | recent | 377 | 1243 | 2008 |
| 30 | ADP | RBSN | max | 1175 | 3386 | 2005 |
| 30 | ADP | RBSN | median | 659 | 1899 | 2 |
| 30 | ADP | RBSN | recent | 143 | 412 | 2006 |
| 30 | ADP | RONW | max | 26 | 76 | 2006 |
| 30 | ADP | RONW | median | 26 | 76 | 1 |
| 30 | ADP | RONW | recent | 26 | 76 | 2006 |
| 30 | ADP | ROOK | max | 9330 | 19749 | 1988 |
| 30 | ADP | ROOK | median | 9245 | 19570 | 2 |
| 30 | ADP | ROOK | recent | 9161 | 19391 | 2011 |
| 30 | ADP | ROSE | max | 168 | 539 | 2006 |
| 30 | ADP | ROSE | median | 137 | 438 | 2 |
| 30 | ADP | ROSE | recent | 168 | 539 | 2006 |
| 30 | ADP | STAN | max | 316 | 1042 | 2008 |
| 30 | ADP | STAN | median | 316 | 1042 | 1 |
| 30 | ADP | STAN | recent | 316 | 1042 | 2008 |
| 30 | ADP | STUN | max | 83 | 274 | 2008 |
| 30 | ADP | STUN | median | 83 | 274 | 1 |
| 30 | ADP | STUN | recent | 83 | 274 | 2008 |
| 30 | ADP | THOR | max | 1001 | 3370 | 2005 |
| 30 | ADP | THOR | median | 592 | 1994 | 2 |
| 30 | ADP | THOR | recent | 184 | 618 | 2006 |
| 30 | ADP | UFSI | max | 147 | 629 | 2008 |
| 30 | ADP | UFSI | median | 136 | 580 | 2 |
| 30 | ADP | UFSI | recent | 124 | 531 | 2009 |
| 30 | ADP | UNN7 | max | 1450 | 3688 | 2011 |
| 30 | ADP | UNN7 | median | 1450 | 3688 | 1 |
| 30 | ADP | UNN7 | recent | 1450 | 3688 | 2011 |
| 30 | EMP | AUST | min | 3337 | 6537 | 2009 |
| 30 | EMP | AUST | max | 4673 | 9154 | 1978 |
| 30 | EMP | AUST | median | 4673 | 9154 | 3 |
| 30 | EMP | AUST | recent | 3337 | 6537 | 2009 |
| 30 | EMP | TAYG | min | 210 | 267 | 2009 |
| 30 | EMP | TAYG | max | 1173 | 1491 | 1988 |
| 30 | EMP | TAYG | median | 698 | 887 | 3 |
| 30 | EMP | TAYG | recent | 210 | 267 | 2009 |

# Antarctica marine IBA: 31

| Site code | 31 |
| --- | --- |
| Species | EMP |
| IBA criteria | A4: Congregations |
| Decimal Latitude | -66.492 |
| Decimal Longitude | 63.972 |
| Area (ha) | 3288116 |
| Area (km2) | 32881.16 |
| MPA Overlap | EARSMPA |
| MPA Type | Proposed |
| MPA Zones | MacRobertson MPA |


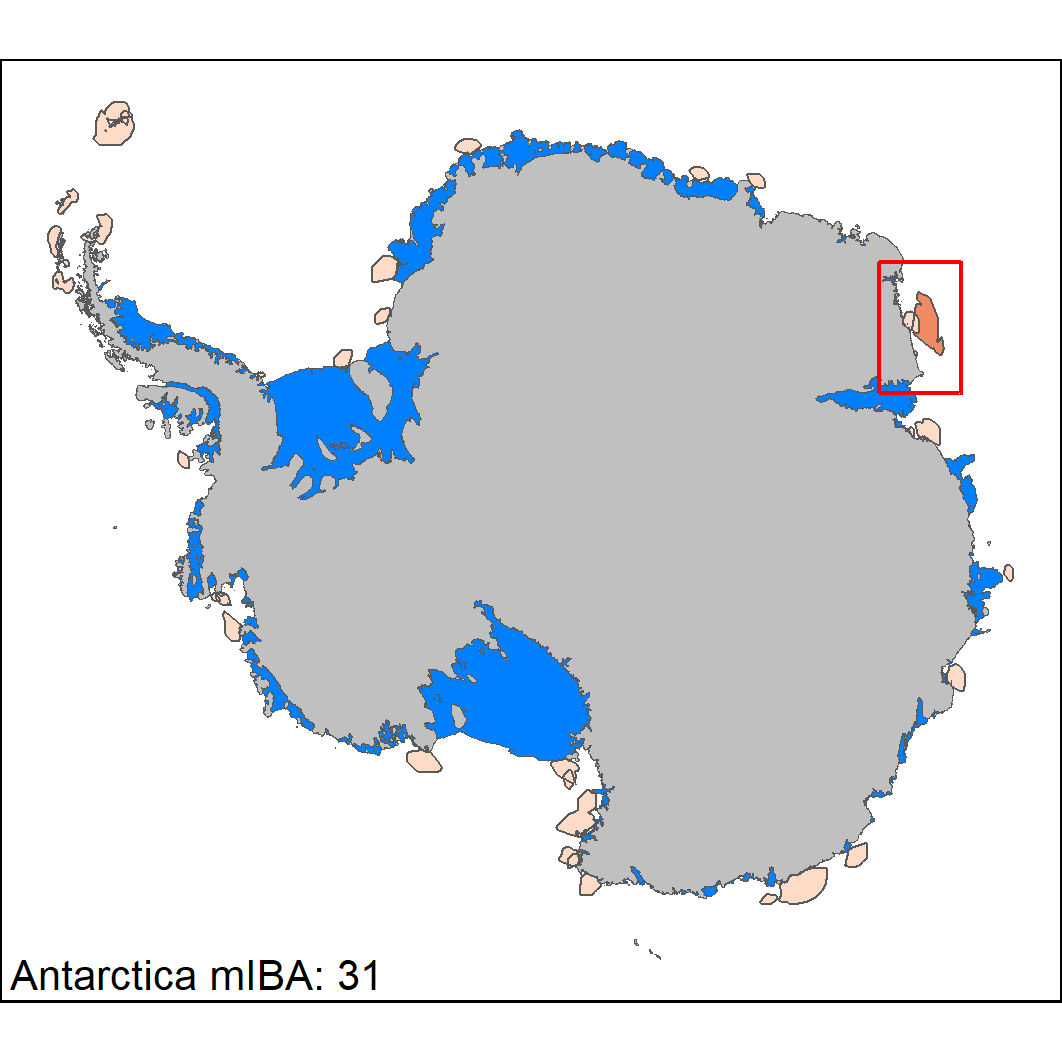


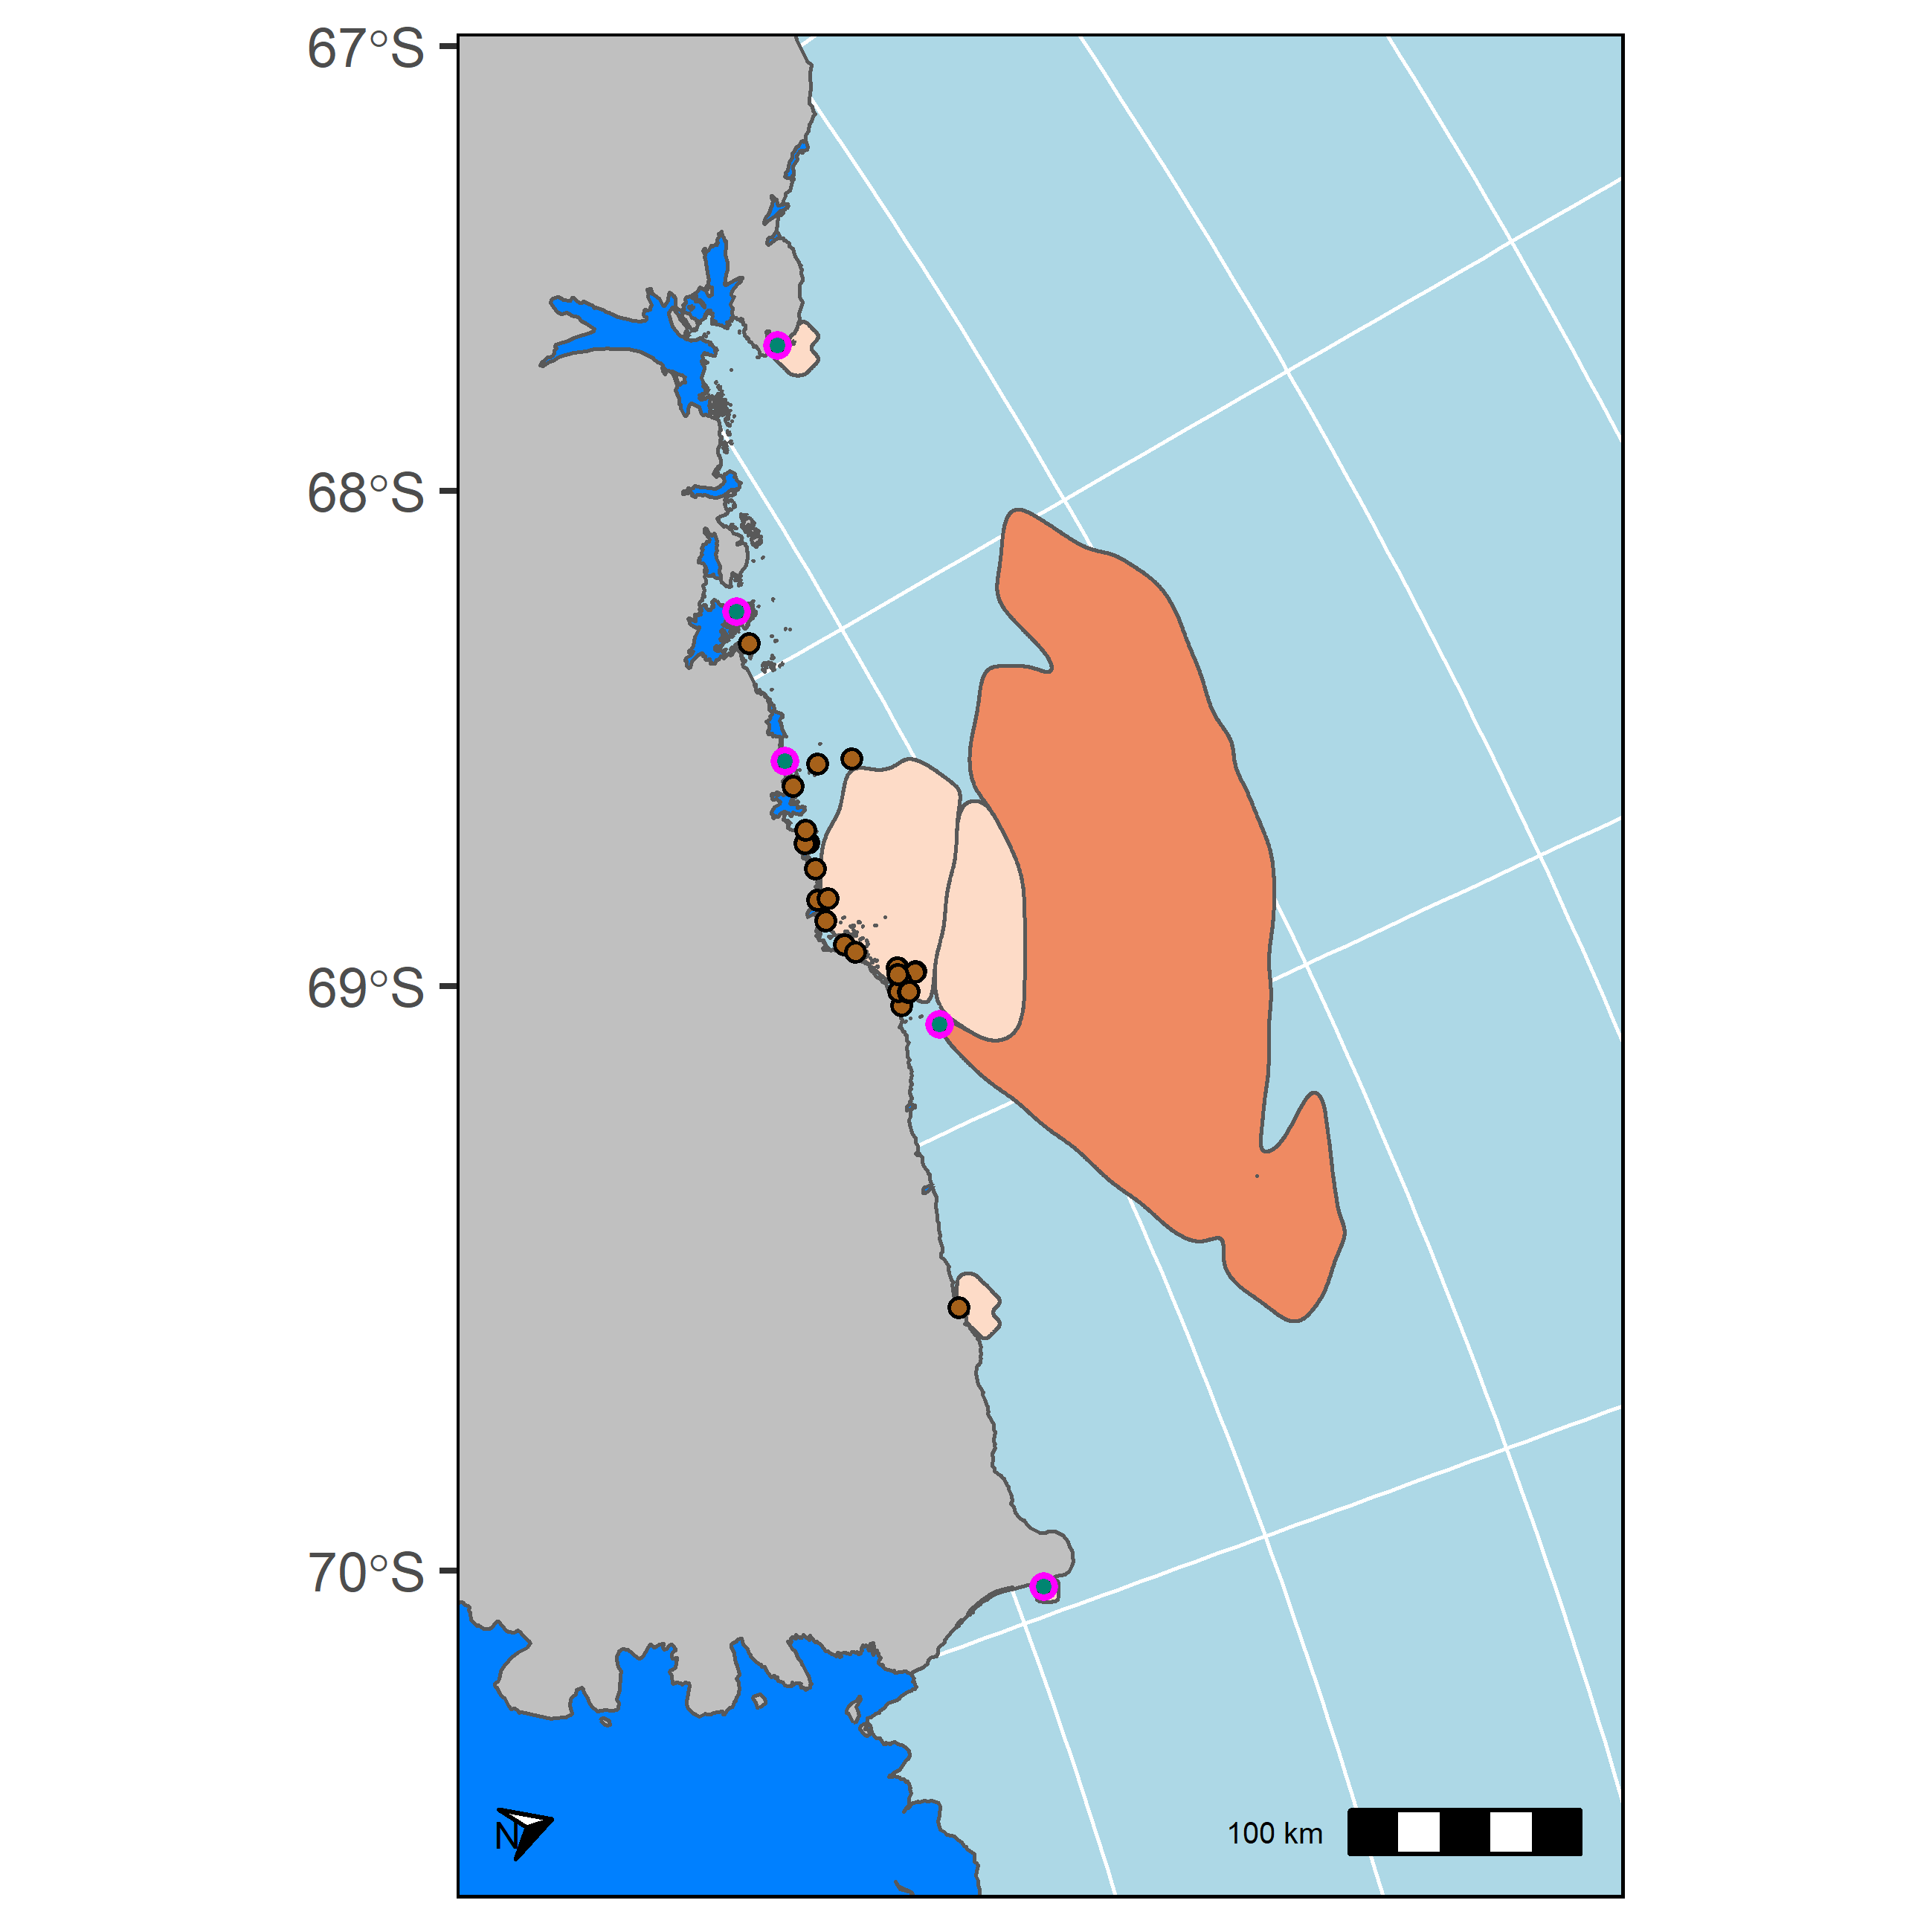


Figure A31.1: Focal Antarctica marine IBA 31 (orange polygon) for penguins, and other marine IBAs (light orange) for penguins identified during the project. Colonies circled in purple are those whose populations contributed to the marine IBA triggering IBA criteria A4 (>1% of the global population). See Table A31.2.

Table A31.1: Population estimates and count types (those that triggered IBA Criteria A4, >1% of global population) for key penguin species in Antarctic marine IBA 31. Key sources of colony input data associated with this marine IBA are detailed in Table A31.2. Population estimates refer to the lower and upper estimated number of adult breeding pairs likely to be using the marine IBA; derived from summing over all cells from individual colony density distribution surfaces which contributed to the identification of the marine IBA.

| Site code | Species | Count type | Lower | Upper |
| --- | --- | --- | --- | --- |
| 31 | EMP | min | 2565 | 7855 |
| 31 | EMP | max | 3510 | 11000 |
| 31 | EMP | median | 3422 | 11000 |
| 31 | EMP | recent | 2565 | 7855 |

Table A31.2: Population estimates (adult breeding pairs) and count types from individual colony(ies) density distribution surfaces which contributed to the identification of marine IBA: 31. I.e. The lower and upper estimated number of adult breeding pairs from a given colony that may utilise the marine IBA. Note, the lower population estimate represents the lowest estimated number of breeding pairs from a given colony contributing to the delineation of the marine IBA site. The lower population estimate may therefore be zero when only part of the individual colony(ies) density distribution surface contributed to the marine IBA. *The Count Year for the median population estimate indicates the number of yearly population assessments for the given colony. Colony names are given in the ‘Colony Codes’ table at the end of this document.

| Site code | Species | Colony | Count type | Lower | Upper | Count year* |
| --- | --- | --- | --- | --- | --- | --- |
| 31 | EMP | AUST | min | 1046 | 7855 | 2009 |
| 31 | EMP | AUST | max | 1464 | 11000 | 1978 |
| 31 | EMP | AUST | median | 1464 | 11000 | 3 |
| 31 | EMP | AUST | recent | 1046 | 7855 | 2009 |
| 31 | EMP | DARN | min | 425 | 969 | 2009 |
| 31 | EMP | DARN | max | 614 | 1398 | 1961 |
| 31 | EMP | DARN | median | 520 | 1183 | 2 |
| 31 | EMP | DARN | recent | 425 | 969 | 2009 |
| 31 | EMP | FOLD | min | 17 | 83 | 2009 |
| 31 | EMP | FOLD | max | 17 | 83 | 2009 |
| 31 | EMP | FOLD | median | 17 | 83 | 1 |
| 31 | EMP | FOLD | recent | 17 | 83 | 2009 |
| 31 | EMP | KLOA | min | 0 | 1270 | 2009 |
| 31 | EMP | KLOA | max | 0 | 1270 | 2009 |
| 31 | EMP | KLOA | median | 0 | 1270 | 1 |
| 31 | EMP | KLOA | recent | 0 | 1270 | 2009 |
| 31 | EMP | TAYG | min | 36 | 257 | 2009 |
| 31 | EMP | TAYG | max | 201 | 1439 | 1988 |
| 31 | EMP | TAYG | median | 119 | 856 | 3 |
| 31 | EMP | TAYG | recent | 36 | 257 | 2009 |

# Antarctica marine IBA: 32

| Site code | 32 |
| --- | --- |
| Species | ADP |
| IBA criteria | A4: Congregations |
| Decimal Latitude | -67.71 |
| Decimal Longitude | 66.743 |
| Area (ha) | 36684.4 |
| Area (km2) | 366.844 |
| MPA Overlap | EARSMPA |
| MPA Type | Proposed |
| MPA Zones | MacRobertson MPA |


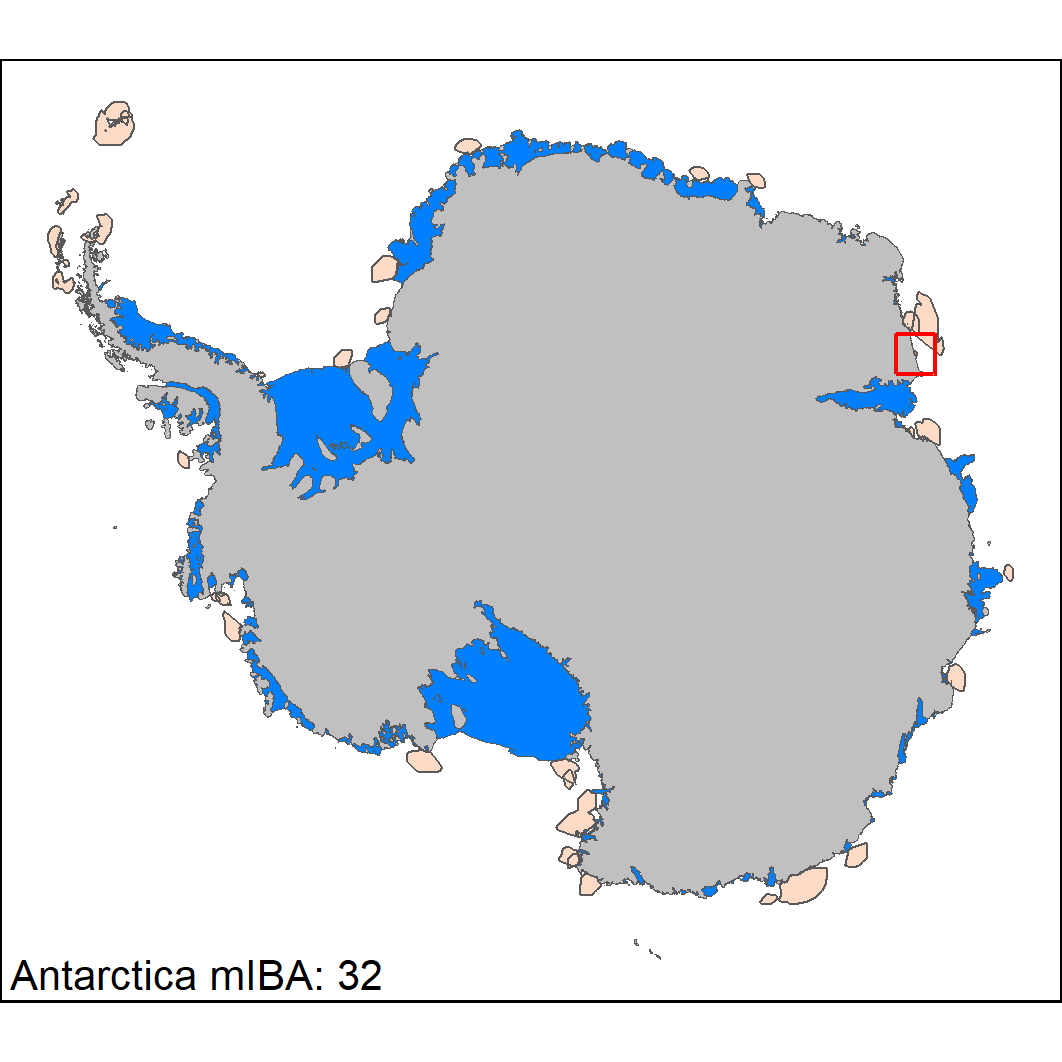


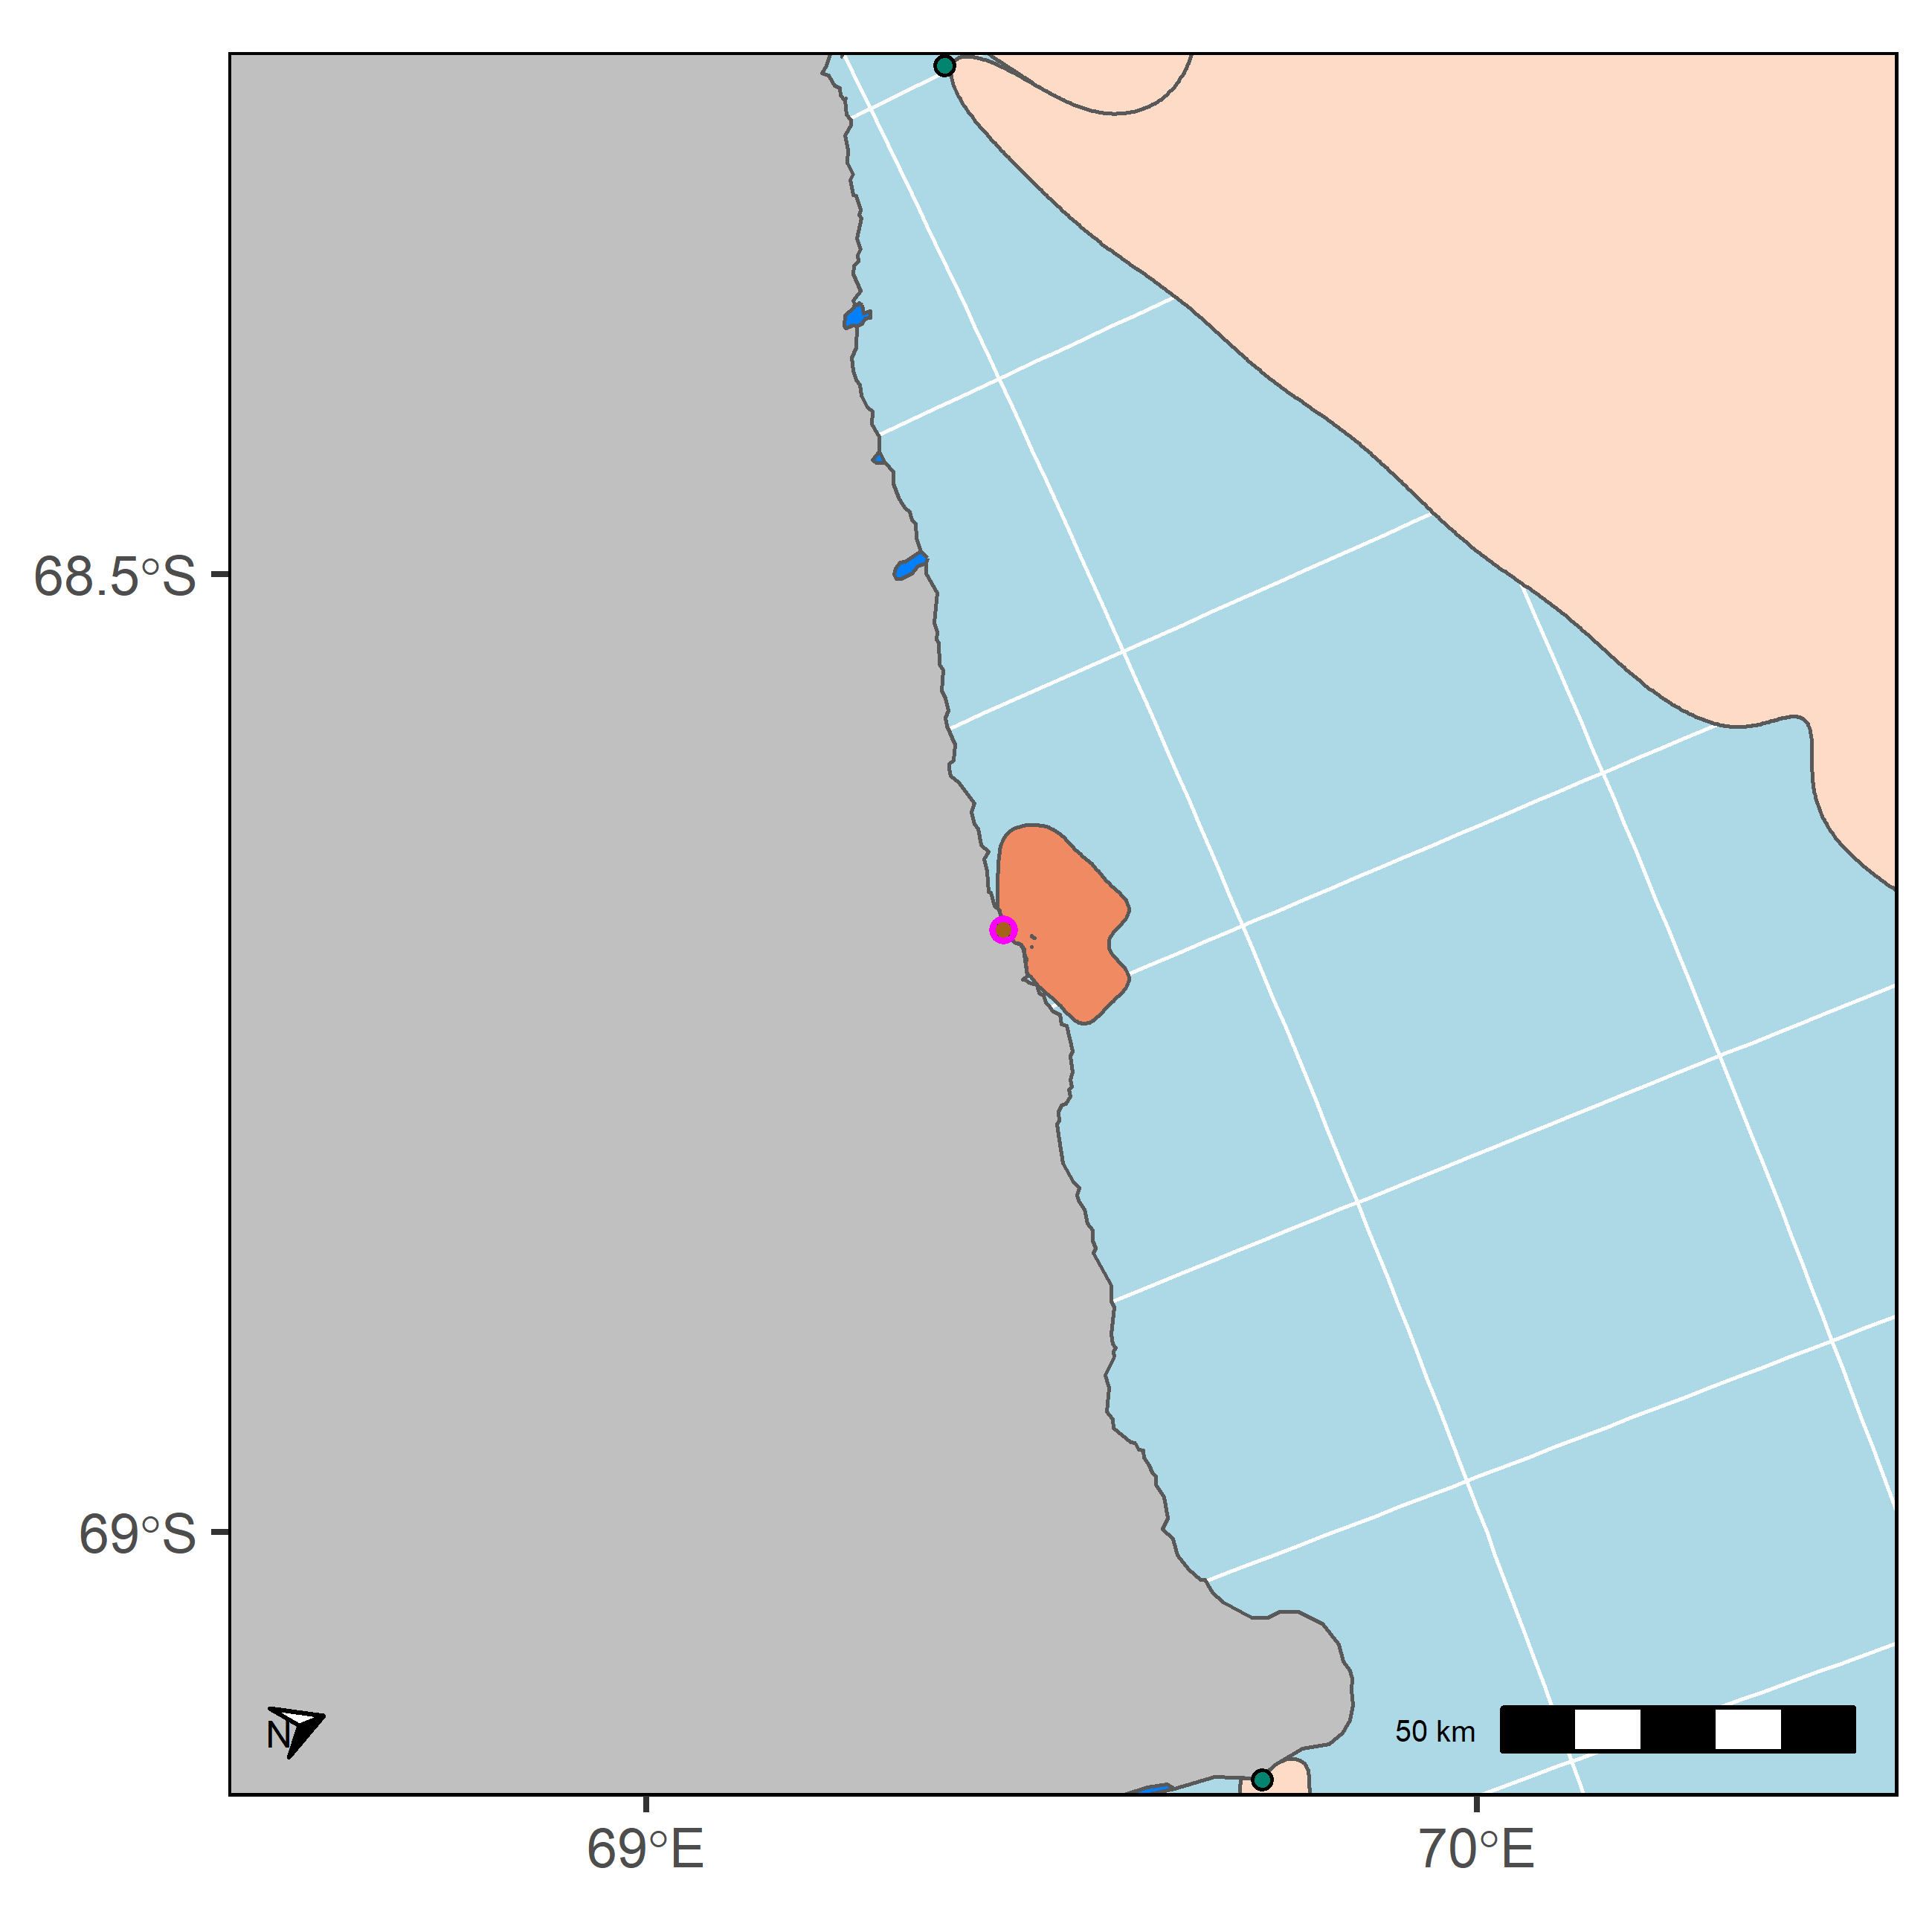


Figure A32.1: Focal Antarctica marine IBA 32 (orange polygon) for penguins, and other marine IBAs (light orange) for penguins identified during the project. Colonies circled in purple are those whose populations contributed to the marine IBA triggering IBA criteria A4 (>1% of the global population). See Table A32.2.

Table A32.1: Population estimates and count types (those that triggered IBA Criteria A4, >1% of global population) for key penguin species in Antarctic marine IBA 32. Key sources of colony input data associated with this marine IBA are detailed in Table A32.2. Population estimates refer to the lower and upper estimated number of adult breeding pairs likely to be using the marine IBA; derived from summing over all cells from individual colony density distribution surfaces which contributed to the identification of the marine IBA.

| Site code | Species | Count type | Lower | Upper |
| --- | --- | --- | --- | --- |
| 32 | ADP | min | 38020 | 54499 |
| 32 | ADP | max | 38020 | 54499 |
| 32 | ADP | median | 38020 | 54499 |
| 32 | ADP | recent | 38020 | 54499 |

Table A32.2: Population estimates (adult breeding pairs) and count types from individual colony(ies) density distribution surfaces which contributed to the identification of marine IBA: 32. I.e. The lower and upper estimated number of adult breeding pairs from a given colony that may utilise the marine IBA. Note, the lower population estimate represents the lowest estimated number of breeding pairs from a given colony contributing to the delineation of the marine IBA site. The lower population estimate may therefore be zero when only part of the individual colony(ies) density distribution surface contributed to the marine IBA. *The Count Year for the median population estimate indicates the number of yearly population assessments for the given colony. Colony names are given in the ‘Colony Codes’ table at the end of this document.

| Site code | Species | Colony | Count type | Lower | Upper | Count year* |
| --- | --- | --- | --- | --- | --- | --- |
| 32 | ADP | SCUL | min | 38020 | 54499 | 2011 |
| 32 | ADP | SCUL | max | 38020 | 54499 | 2011 |
| 32 | ADP | SCUL | median | 38020 | 54499 | 1 |
| 32 | ADP | SCUL | recent | 38020 | 54499 | 2011 |

# Antarctica marine IBA: 33

| Site code | 33 |
| --- | --- |
| Species | EMP |
| IBA criteria | A4: Congregations |
| Decimal Latitude | -67.87 |
| Decimal Longitude | 69.77 |
| Area (ha) | 8193.346 |
| Area (km2) | 81.93346 |
| MPA Overlap | EARSMPA |
| MPA Type | Proposed |
| MPA Zones | MacRobertson MPA |


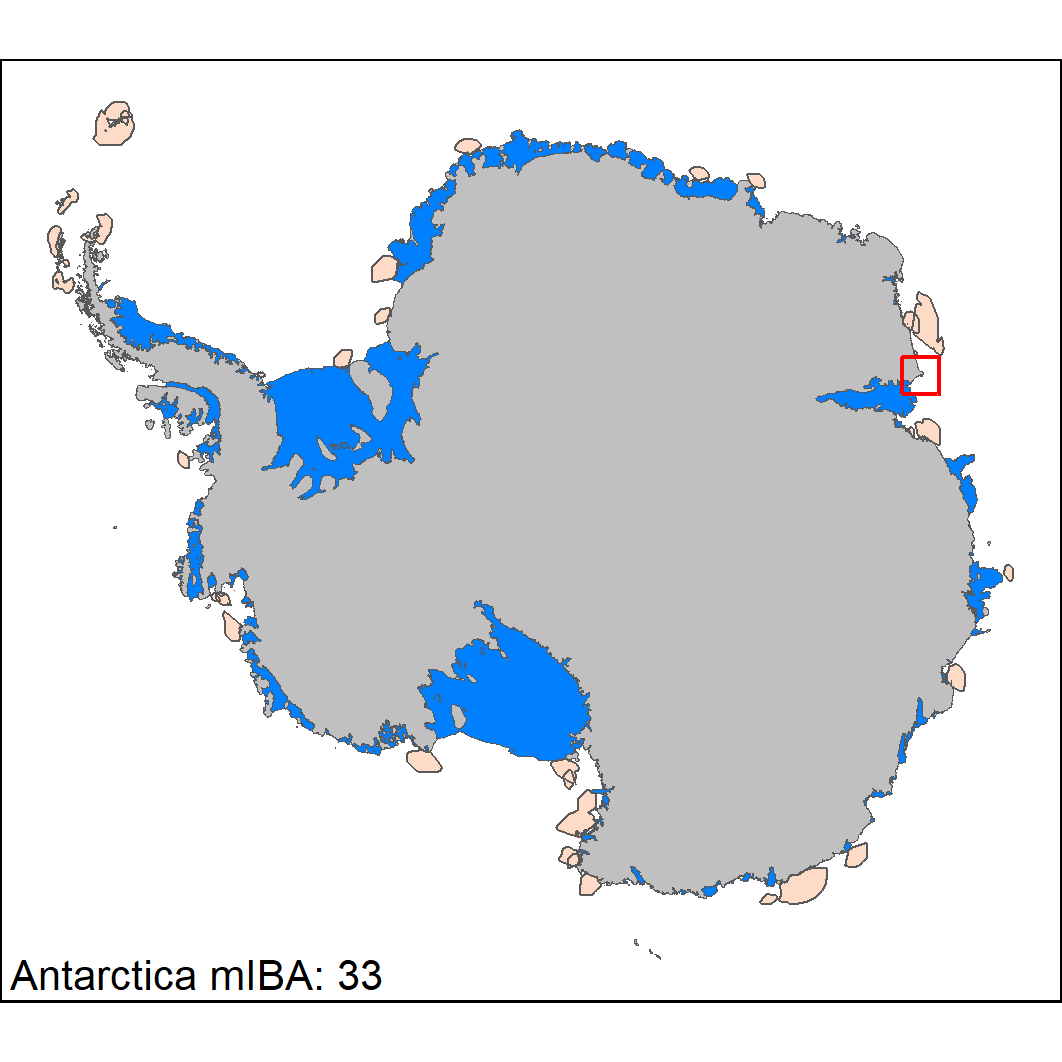


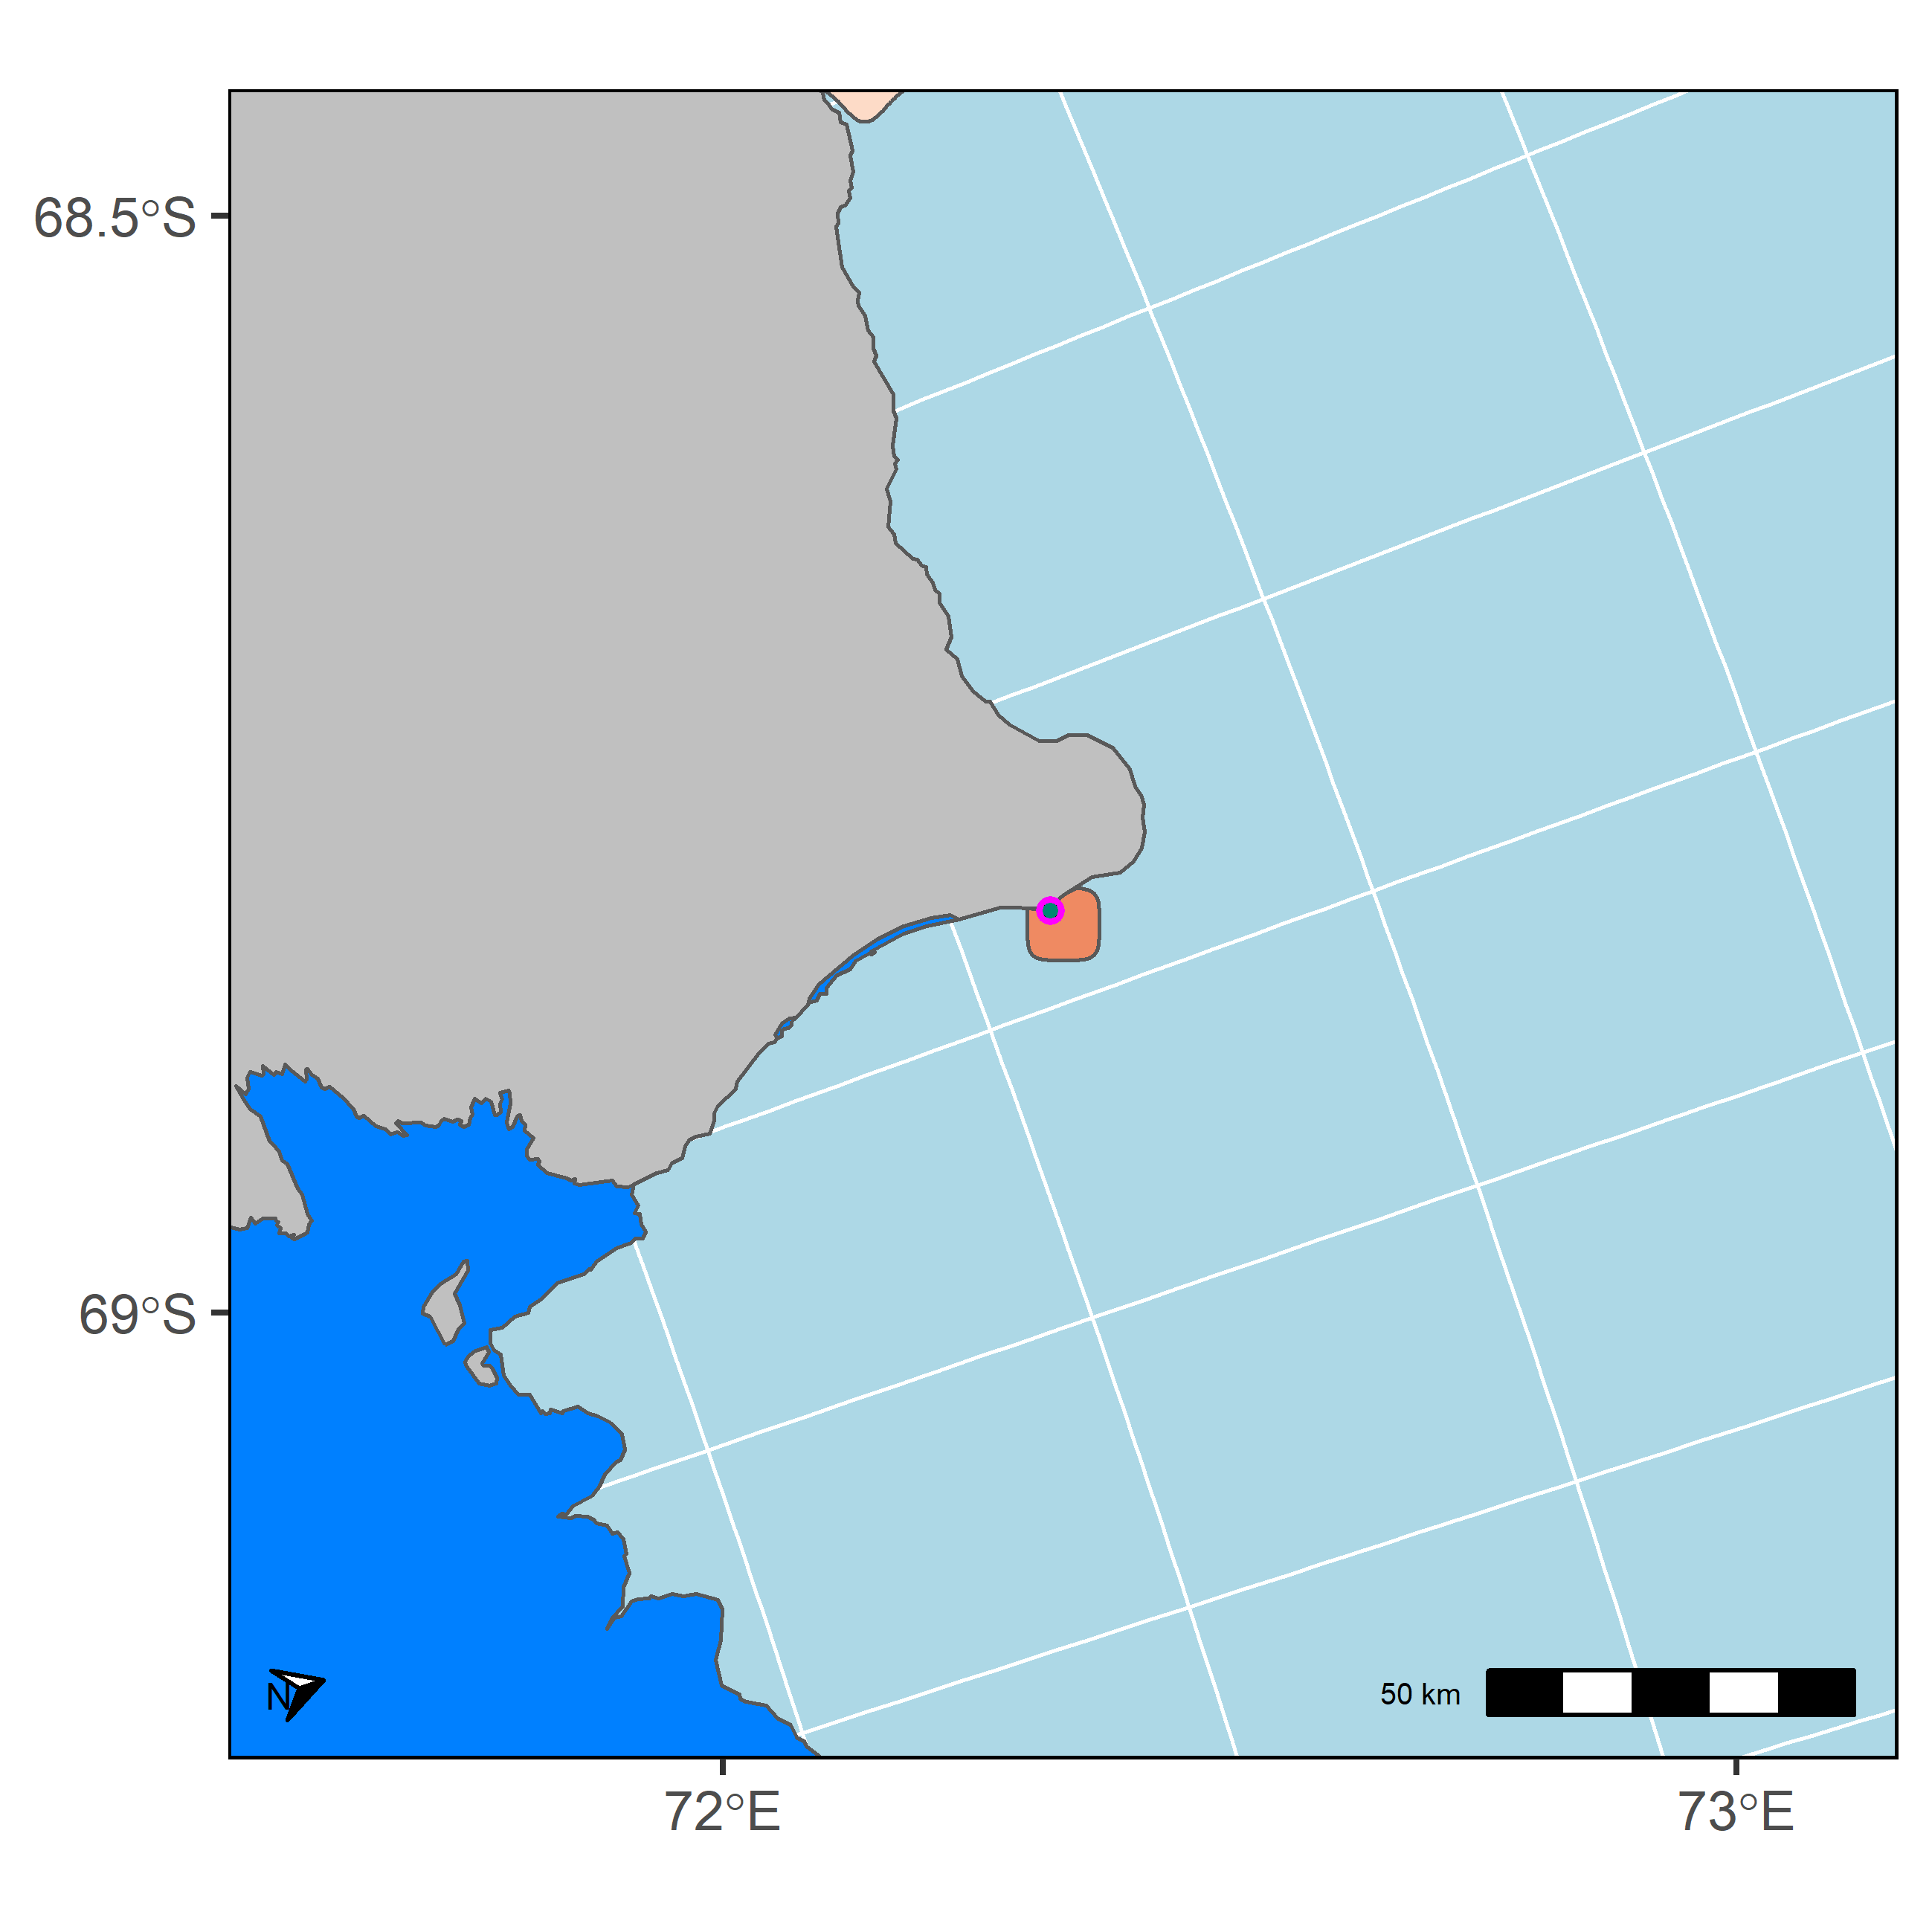


Figure A33.1: Focal Antarctica marine IBA 33 (orange polygon) for penguins, and other marine IBAs (light orange) for penguins identified during the project. Colonies circled in purple are those whose populations contributed to the marine IBA triggering IBA criteria A4 (>1% of the global population). See Table A33.2.

Table A33.1: Population estimates and count types (those that triggered IBA Criteria A4, >1% of global population) for key penguin species in Antarctic marine IBA 33. Key sources of colony input data associated with this marine IBA are detailed in Table A33.2. Population estimates refer to the lower and upper estimated number of adult breeding pairs likely to be using the marine IBA; derived from summing over all cells from individual colony density distribution surfaces which contributed to the identification of the marine IBA.

| Site code | Species | Count type | Lower | Upper |
| --- | --- | --- | --- | --- |
| 33 | EMP | min | 2633 | 3465 |
| 33 | EMP | max | 3800 | 5000 |
| 33 | EMP | median | 3216 | 4232 |
| 33 | EMP | recent | 2633 | 3465 |

Table A33.2: Population estimates (adult breeding pairs) and count types from individual colony(ies) density distribution surfaces which contributed to the identification of marine IBA: 33. I.e. The lower and upper estimated number of adult breeding pairs from a given colony that may utilise the marine IBA. Note, the lower population estimate represents the lowest estimated number of breeding pairs from a given colony contributing to the delineation of the marine IBA site. The lower population estimate may therefore be zero when only part of the individual colony(ies) density distribution surface contributed to the marine IBA. *The Count Year for the median population estimate indicates the number of yearly population assessments for the given colony. Colony names are given in the ‘Colony Codes’ table at the end of this document.

| Site code | Species | Colony | Count type | Lower | Upper | Count year* |
| --- | --- | --- | --- | --- | --- | --- |
| 33 | EMP | DARN | min | 2633 | 3465 | 2009 |
| 33 | EMP | DARN | max | 3800 | 5000 | 1961 |
| 33 | EMP | DARN | median | 3216 | 4232 | 2 |
| 33 | EMP | DARN | recent | 2633 | 3465 | 2009 |

# Antarctica marine IBA: 34

| Site code | 34 |
| --- | --- |
| Species | EMP |
| IBA criteria | A4: Congregations |
| Decimal Latitude | -69.138 |
| Decimal Longitude | 76.755 |
| Area (ha) | 102466.9 |
| Area (km2) | 1024.669 |
| MPA Overlap |  |
| MPA Type | NA |
| MPA Zones |  |


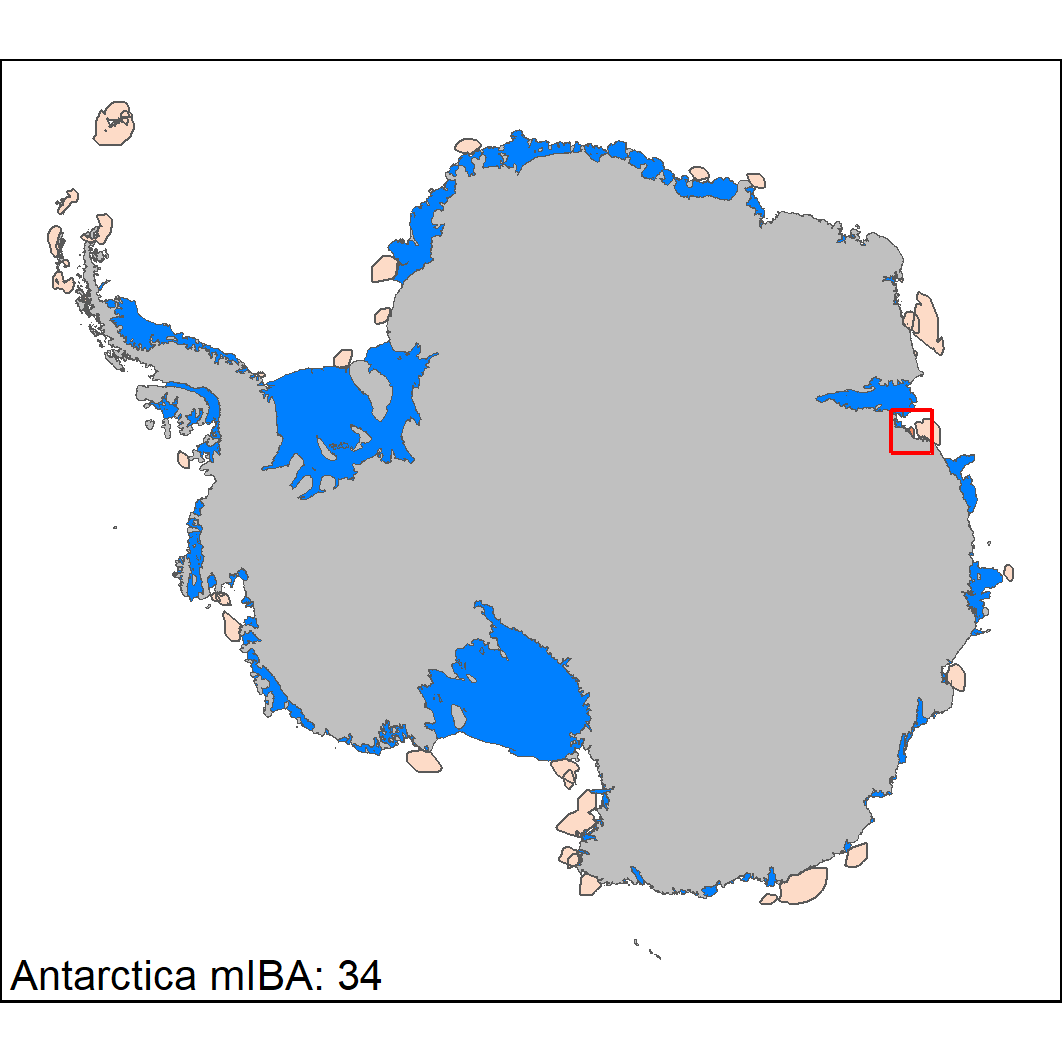


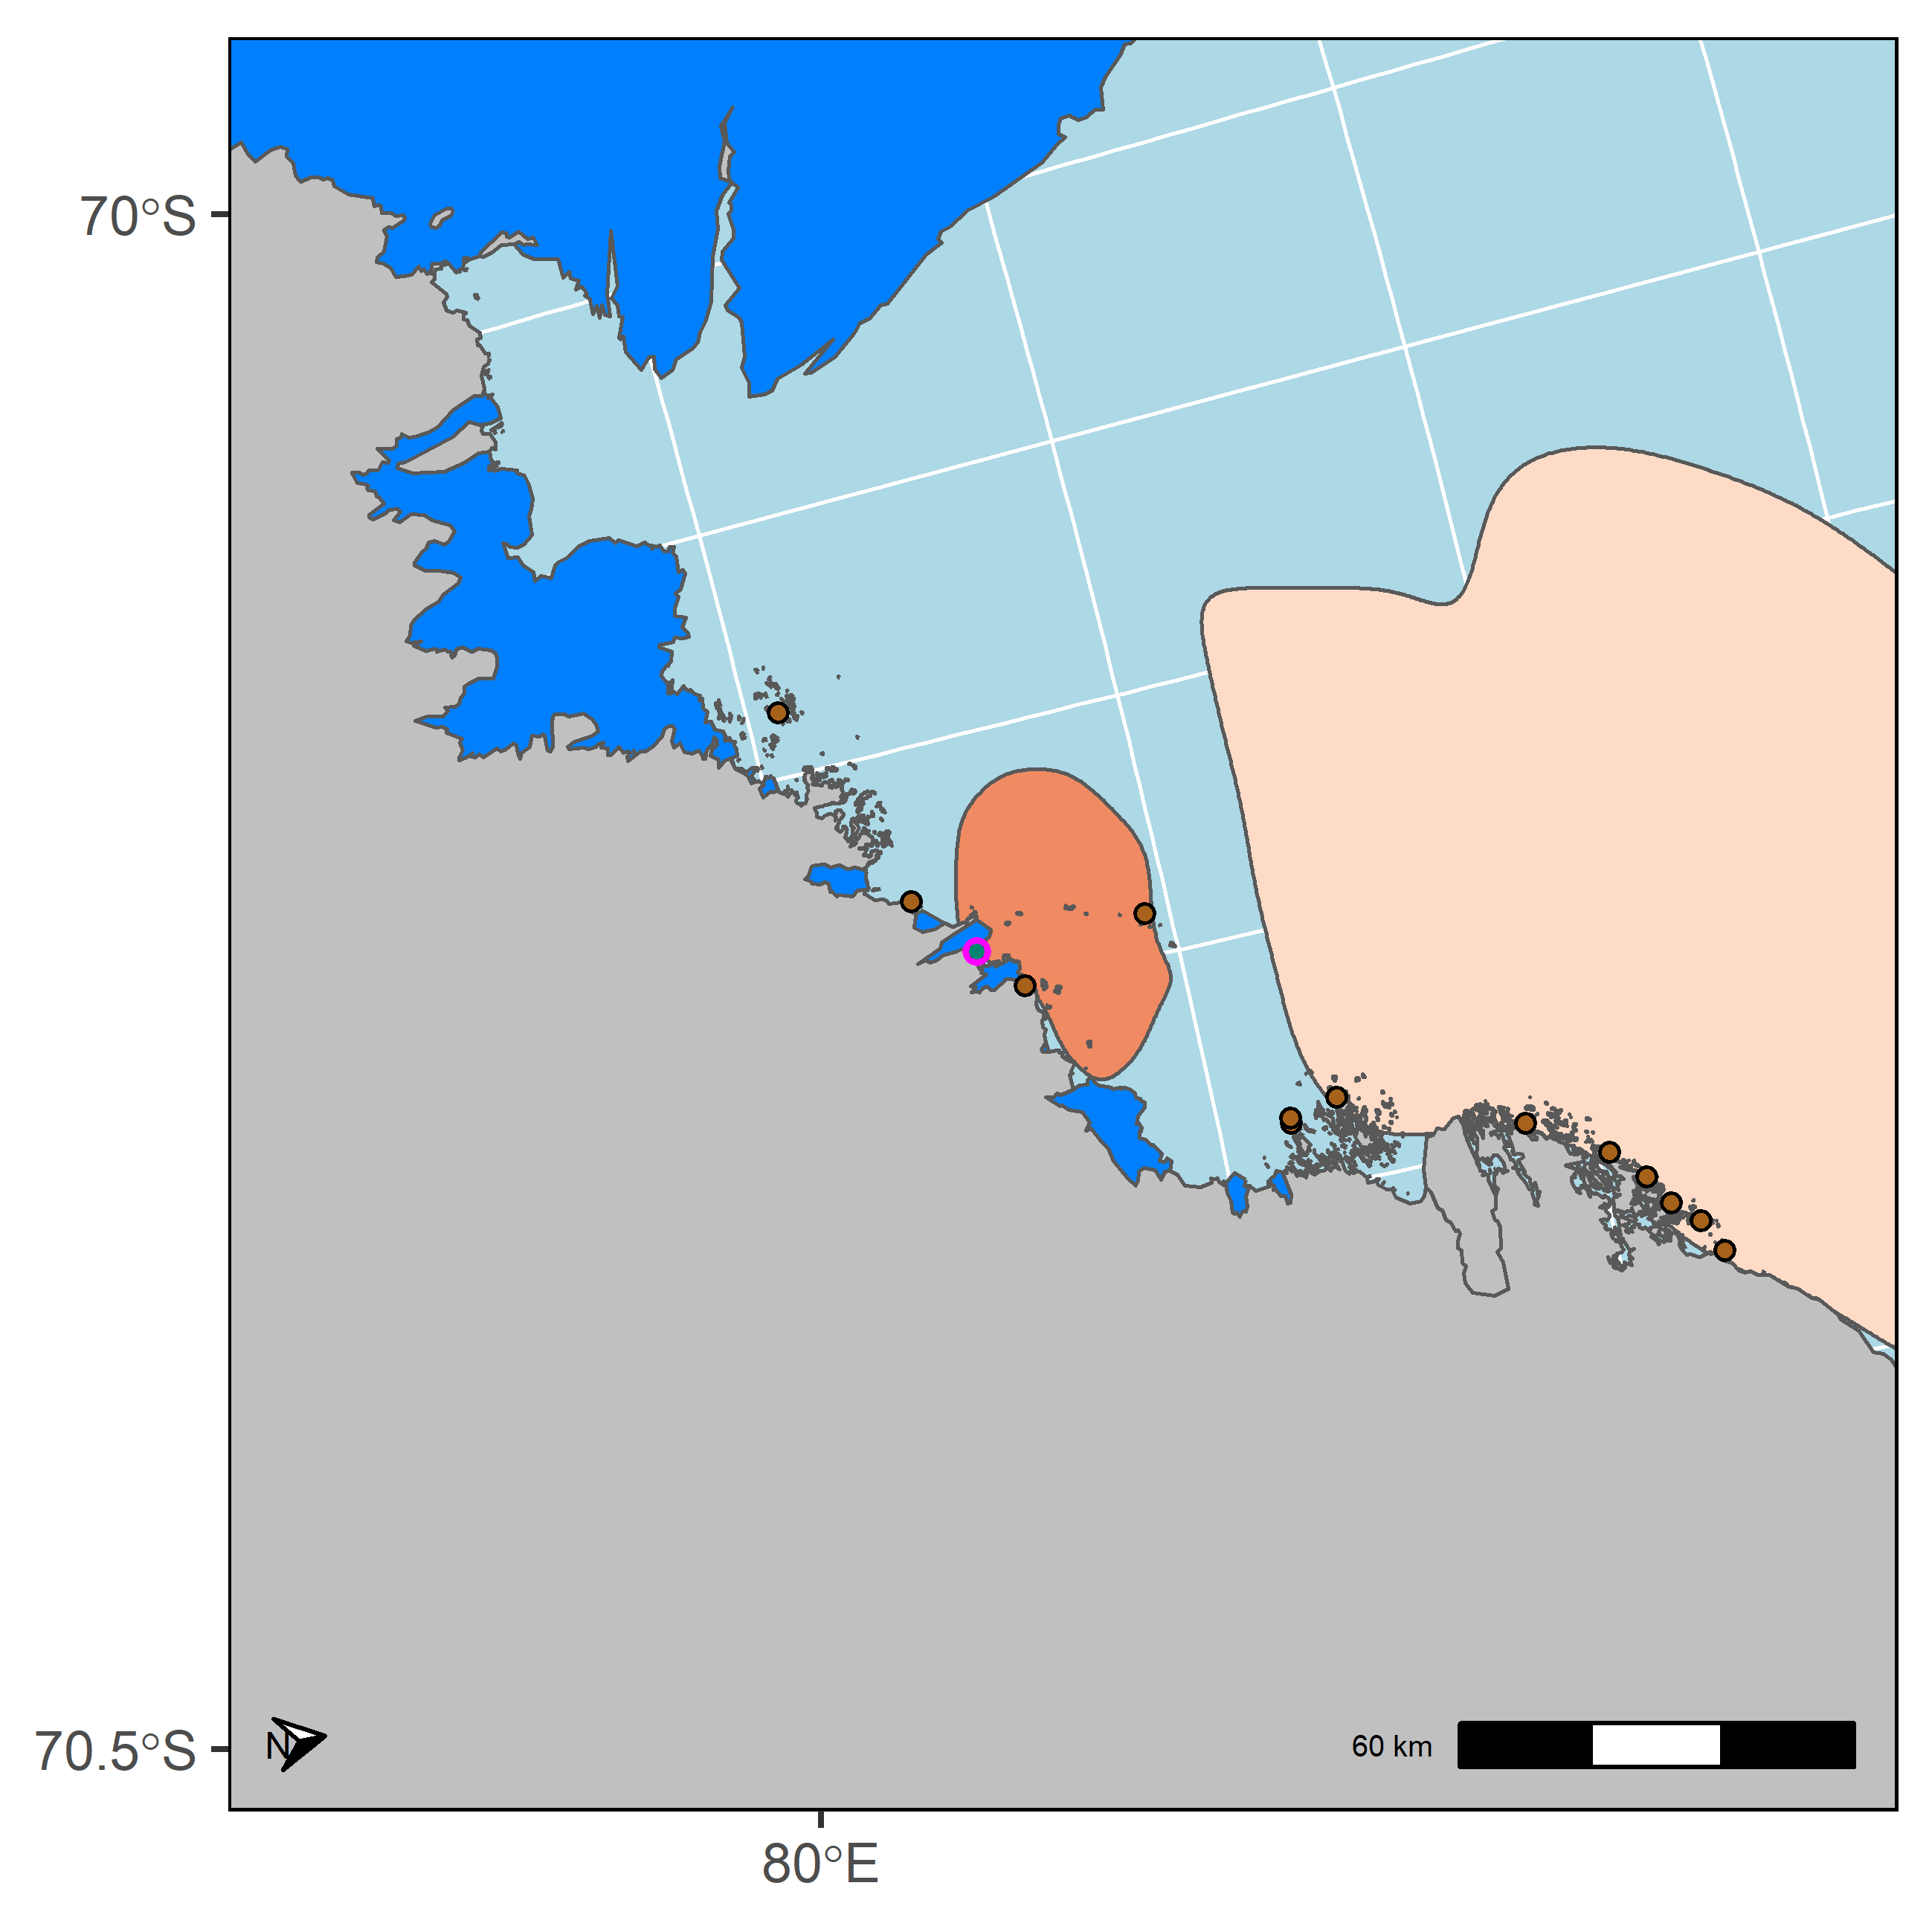


Figure A34.1: Focal Antarctica marine IBA 34 (orange polygon) for penguins, and other marine IBAs (light orange) for penguins identified during the project. Colonies circled in purple are those whose populations contributed to the marine IBA triggering IBA criteria A4 (>1% of the global population). See Table A34.2.

Table A34.1: Population estimates and count types (those that triggered IBA Criteria A4, >1% of global population) for key penguin species in Antarctic marine IBA 34. Key sources of colony input data associated with this marine IBA are detailed in Table A34.2. Population estimates refer to the lower and upper estimated number of adult breeding pairs likely to be using the marine IBA; derived from summing over all cells from individual colony density distribution surfaces which contributed to the identification of the marine IBA.

| Site code | Species | Count type | Lower | Upper |
| --- | --- | --- | --- | --- |
| 34 | EMP | max | 4206 | 6831 |
| 34 | EMP | median | 2565 | 4166 |
| 34 | EMP | recent | 4206 | 6831 |

Table A34.2: Population estimates (adult breeding pairs) and count types from individual colony(ies) density distribution surfaces which contributed to the identification of marine IBA: 34. I.e. The lower and upper estimated number of adult breeding pairs from a given colony that may utilise the marine IBA. Note, the lower population estimate represents the lowest estimated number of breeding pairs from a given colony contributing to the delineation of the marine IBA site. The lower population estimate may therefore be zero when only part of the individual colony(ies) density distribution surface contributed to the marine IBA. *The Count Year for the median population estimate indicates the number of yearly population assessments for the given colony. Colony names are given in the ‘Colony Codes’ table at the end of this document.

| Site code | Species | Colony | Count type | Lower | Upper | Count year* |
| --- | --- | --- | --- | --- | --- | --- |
| 34 | EMP | AMAN | max | 4206 | 6831 | 2009 |
| 34 | EMP | AMAN | median | 2565 | 4166 | 2 |
| 34 | EMP | AMAN | recent | 4206 | 6831 | 2009 |

# Antarctica marine IBA: 35

| Site code | 35 |
| --- | --- |
| Species | ADP |
| IBA criteria | A4: Congregations |
| Decimal Latitude | -68.274 |
| Decimal Longitude | 77.26 |
| Area (ha) | 1397197 |
| Area (km2) | 13971.97 |
| MPA Overlap |  |
| MPA Type | NA |
| MPA Zones |  |


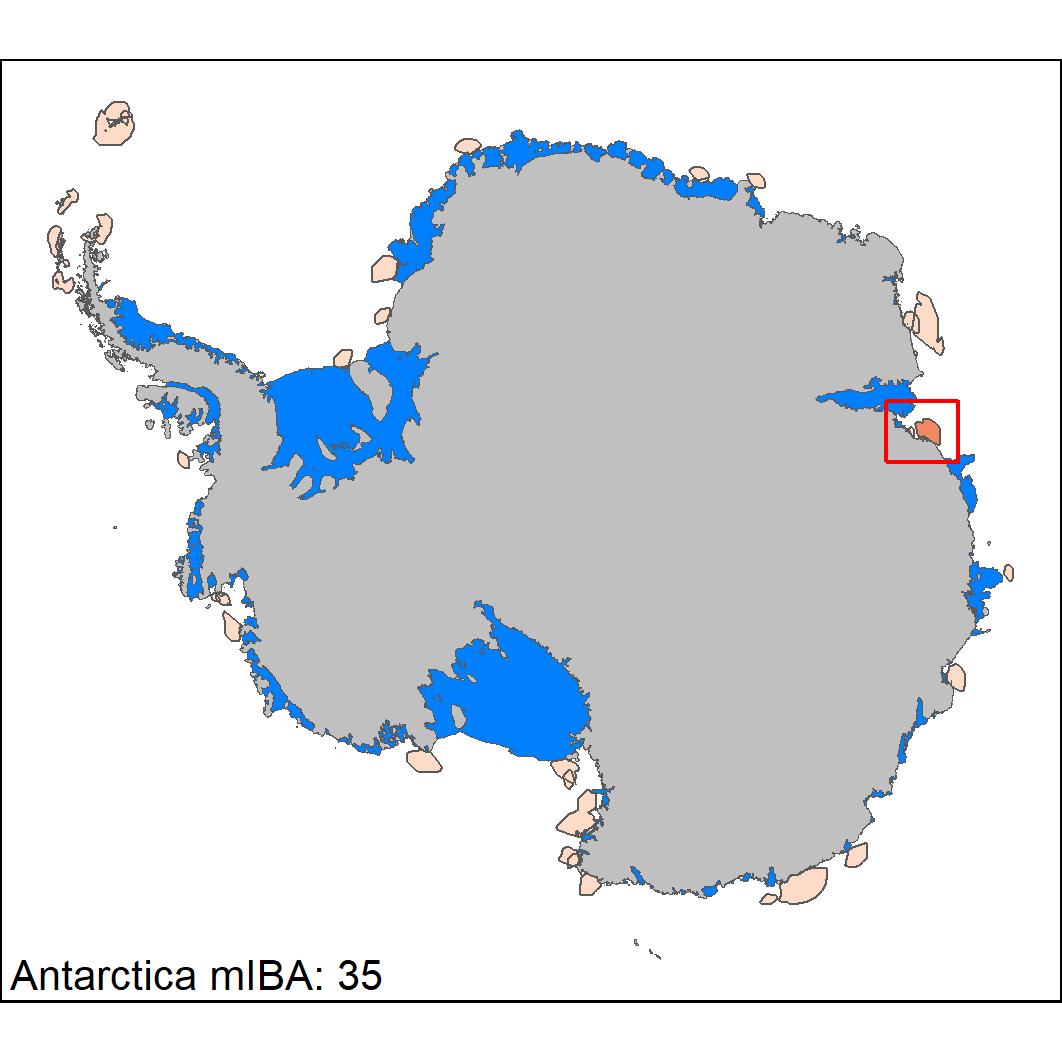


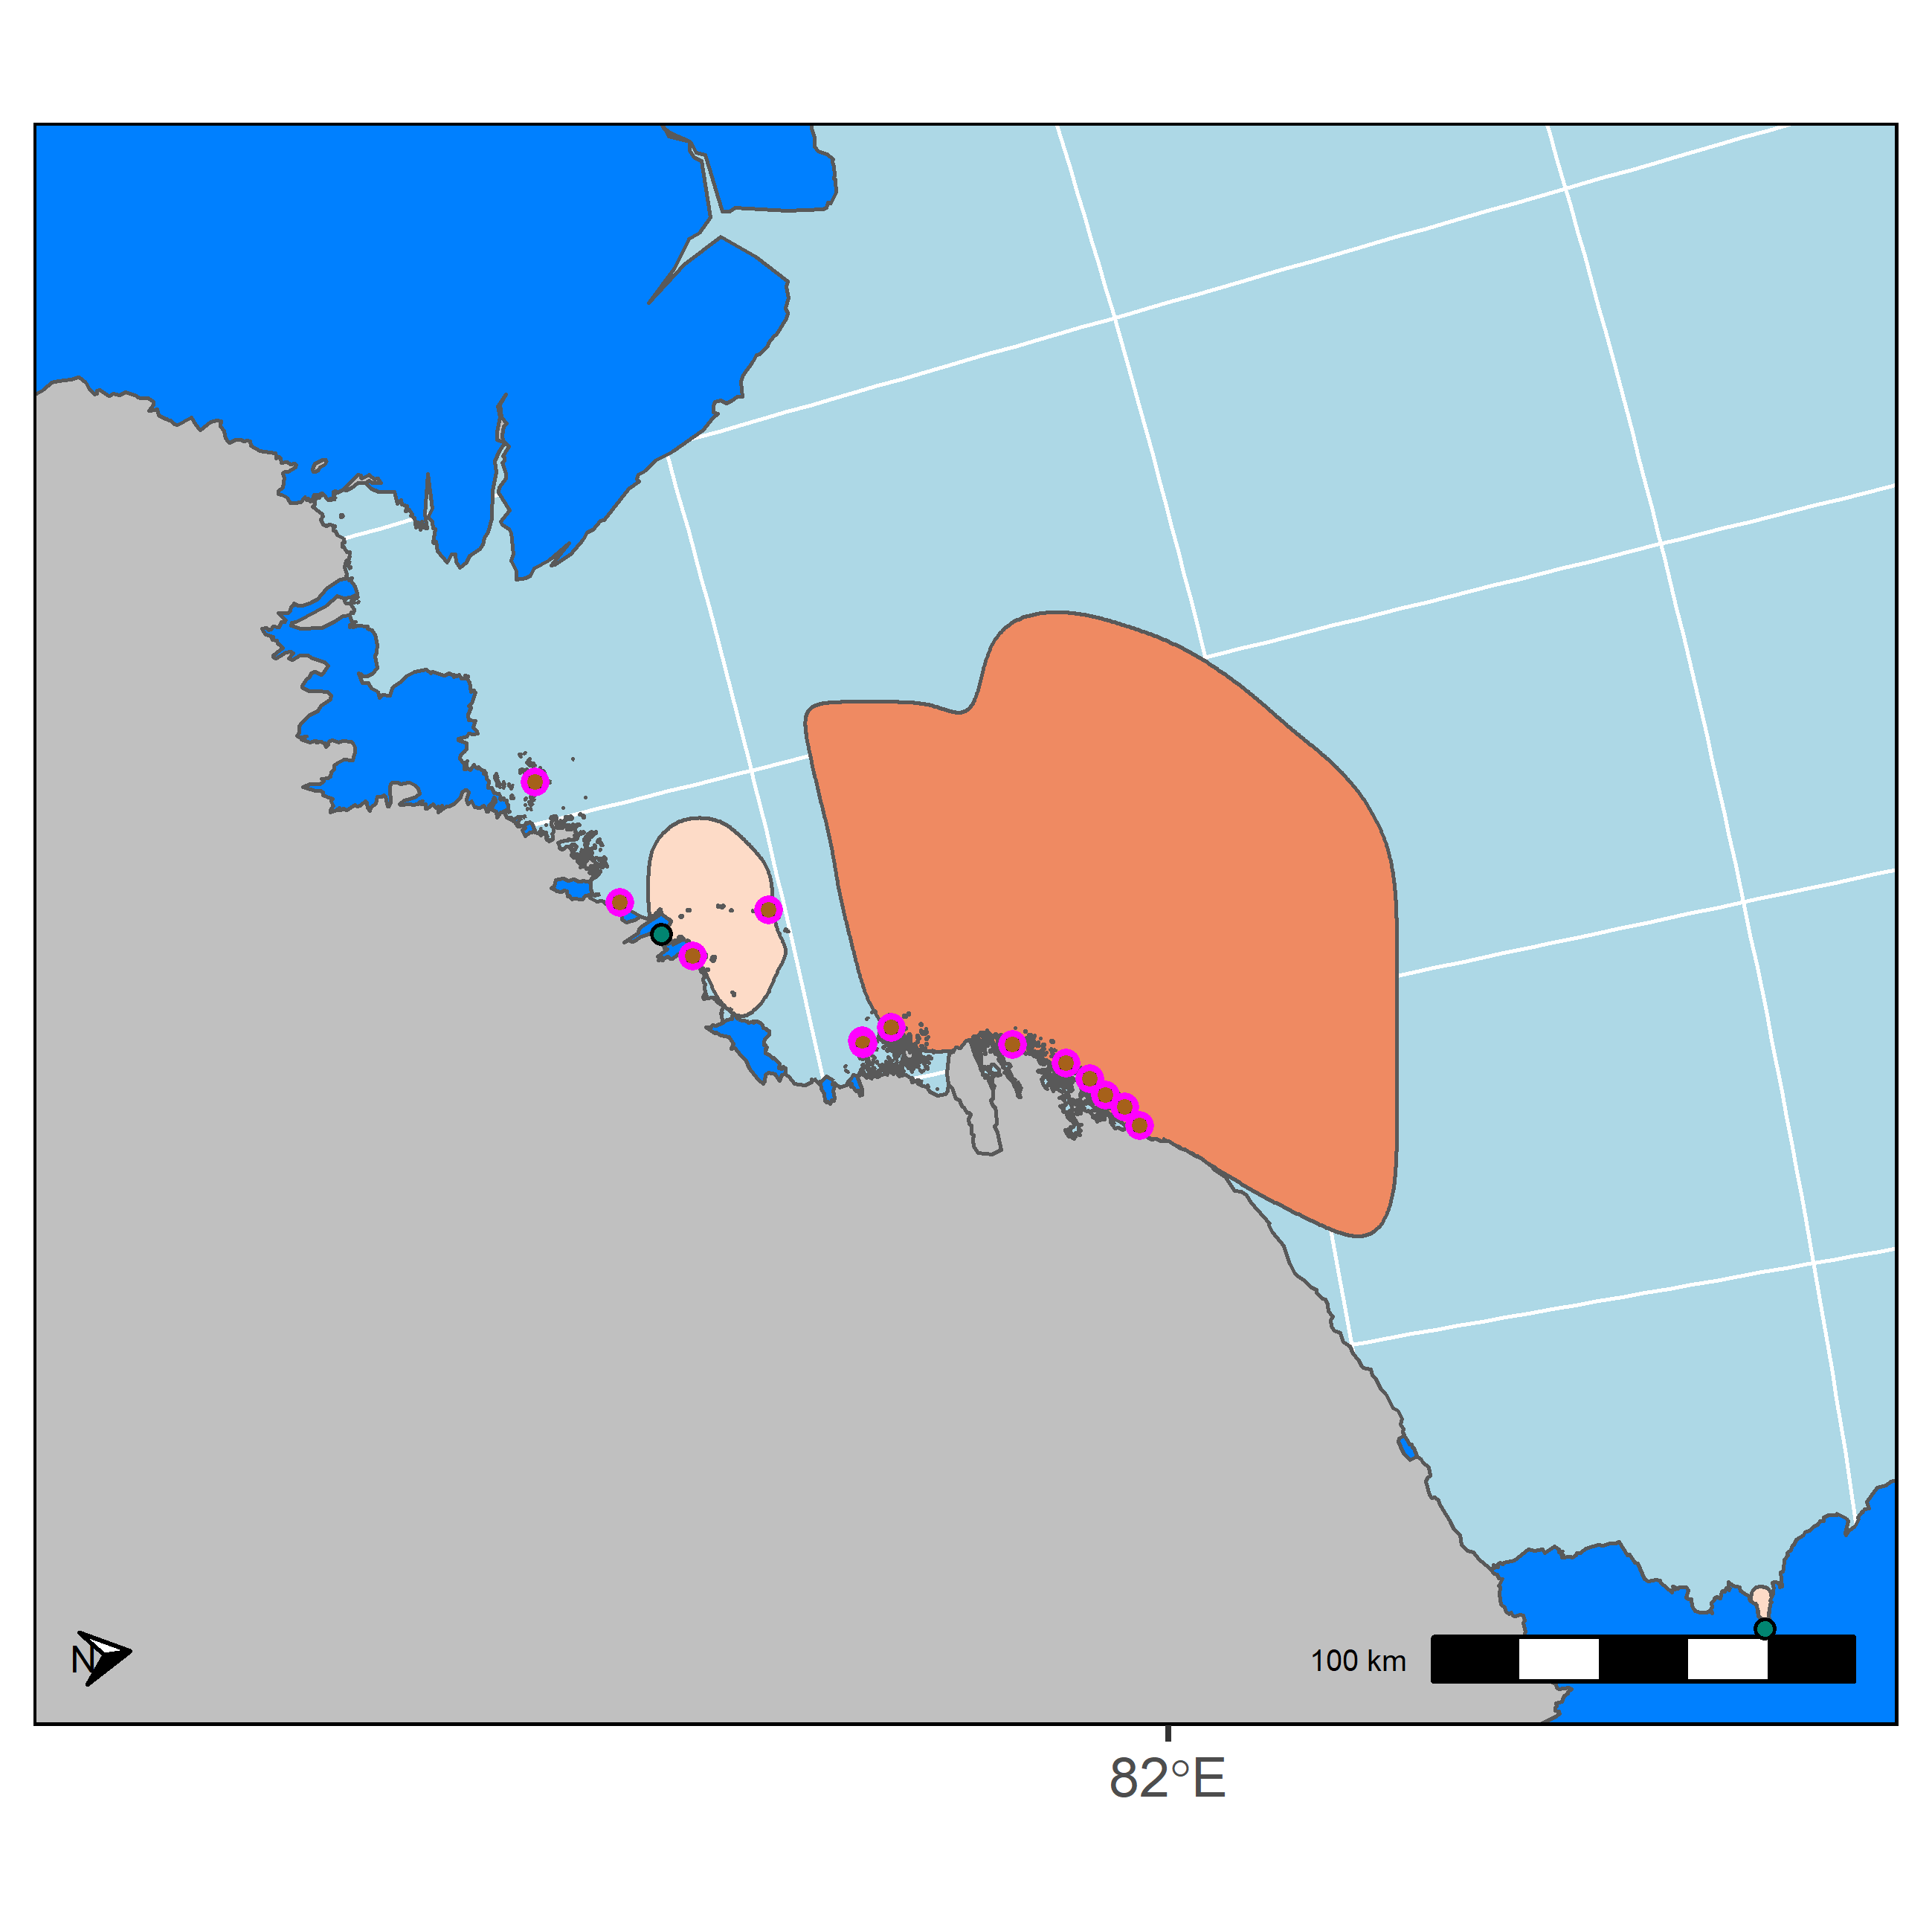


Figure A35.1: Focal Antarctica marine IBA 35 (orange polygon) for penguins, and other marine IBAs (light orange) for penguins identified during the project. Colonies circled in purple are those whose populations contributed to the marine IBA triggering IBA criteria A4 (>1% of the global population). See Table A35.2.

Table A35.1: Population estimates and count types (those that triggered IBA Criteria A4, >1% of global population) for key penguin species in Antarctic marine IBA 35. Key sources of colony input data associated with this marine IBA are detailed in Table A35.2. Population estimates refer to the lower and upper estimated number of adult breeding pairs likely to be using the marine IBA; derived from summing over all cells from individual colony density distribution surfaces which contributed to the identification of the marine IBA.

| Site code | Species | Count type | Lower | Upper |
| --- | --- | --- | --- | --- |
| 35 | ADP | max | 39664 | 219752 |
| 35 | ADP | median | 38138 | 197770 |
| 35 | ADP | recent | 38127 | 181075 |

Table A35.2: Population estimates (adult breeding pairs) and count types from individual colony(ies) density distribution surfaces which contributed to the identification of marine IBA: 35. I.e. The lower and upper estimated number of adult breeding pairs from a given colony that may utilise the marine IBA. Note, the lower population estimate represents the lowest estimated number of breeding pairs from a given colony contributing to the delineation of the marine IBA site. The lower population estimate may therefore be zero when only part of the individual colony(ies) density distribution surface contributed to the marine IBA. *The Count Year for the median population estimate indicates the number of yearly population assessments for the given colony. Colony names are given in the ‘Colony Codes’ table at the end of this document.

| Site code | Species | Colony | Count type | Lower | Upper | Count year* |
| --- | --- | --- | --- | --- | --- | --- |
| 35 | ADP | BOLI | max | 0 | 135 | 1981 |
| 35 | ADP | BOLI | median | 0 | 135 | 1 |
| 35 | ADP | BOLI | recent | 0 | 135 | 1981 |
| 35 | ADP | BRAT | max | 0 | 2717 | 1981 |
| 35 | ADP | BRAT | median | 0 | 2717 | 1 |
| 35 | ADP | BRAT | recent | 0 | 2717 | 1981 |
| 35 | ADP | LONG | max | 351 | 6815 | 1981 |
| 35 | ADP | LONG | median | 259 | 5034 | 2 |
| 35 | ADP | LONG | recent | 167 | 3252 | 2011 |
| 35 | ADP | RAUE | max | 3362 | 115034 | 2011 |
| 35 | ADP | RAUE | median | 3200 | 109475 | 2 |
| 35 | ADP | RAUE | recent | 3362 | 115034 | 2011 |
| 35 | ADP | STEI | max | 0 | 502 | 1981 |
| 35 | ADP | STEI | median | 0 | 344 | 2 |
| 35 | ADP | STEI | recent | 0 | 185 | 2011 |
| 35 | ADP | SVIS | max | 0 | 11406 | 1981 |
| 35 | ADP | SVIS | median | 0 | 11406 | 1 |
| 35 | ADP | SVIS | recent | 0 | 11406 | 1981 |
| 35 | ADP | TRYN | max | 941 | 13789 | 2011 |
| 35 | ADP | TRYN | median | 941 | 13789 | 1 |
| 35 | ADP | TRYN | recent | 941 | 13789 | 2011 |
| 35 | ADP | UIP2 | max | 2 | 34 | 2011 |
| 35 | ADP | UIP2 | median | 2 | 34 | 1 |
| 35 | ADP | UIP2 | recent | 2 | 34 | 2011 |
| 35 | ADP | UIP3 | max | 9 | 123 | 2011 |
| 35 | ADP | UIP3 | median | 9 | 123 | 1 |
| 35 | ADP | UIP3 | recent | 9 | 123 | 2011 |
| 35 | ADP | UIPN | max | 339 | 5594 | 2011 |
| 35 | ADP | UIPN | median | 339 | 5594 | 1 |
| 35 | ADP | UIPN | recent | 339 | 5594 | 2011 |
| 35 | ADP | VESN | max | 6480 | 61739 | 1981 |
| 35 | ADP | VESN | median | 5628 | 53618 | 2 |
| 35 | ADP | VESN | recent | 4776 | 45497 | 2012 |
| 35 | ADP | VESS | max | 17559 | 132049 | 1981 |
| 35 | ADP | VESS | median | 15514 | 116673 | 2 |
| 35 | ADP | VESS | recent | 13470 | 101297 | 2012 |
| 35 | ADP | WYAT | max | 51 | 1028 | 2011 |
| 35 | ADP | WYAT | median | 51 | 1028 | 1 |
| 35 | ADP | WYAT | recent | 51 | 1028 | 2011 |

# Antarctica marine IBA: 36

| Site code | 36 |
| --- | --- |
| Species | EMP |
| IBA criteria | A4: Congregations |
| Decimal Latitude | -67.222 |
| Decimal Longitude | 81.797 |
| Area (ha) | 3183.076 |
| Area (km2) | 31.83076 |
| MPA Overlap |  |
| MPA Type | NA |
| MPA Zones |  |


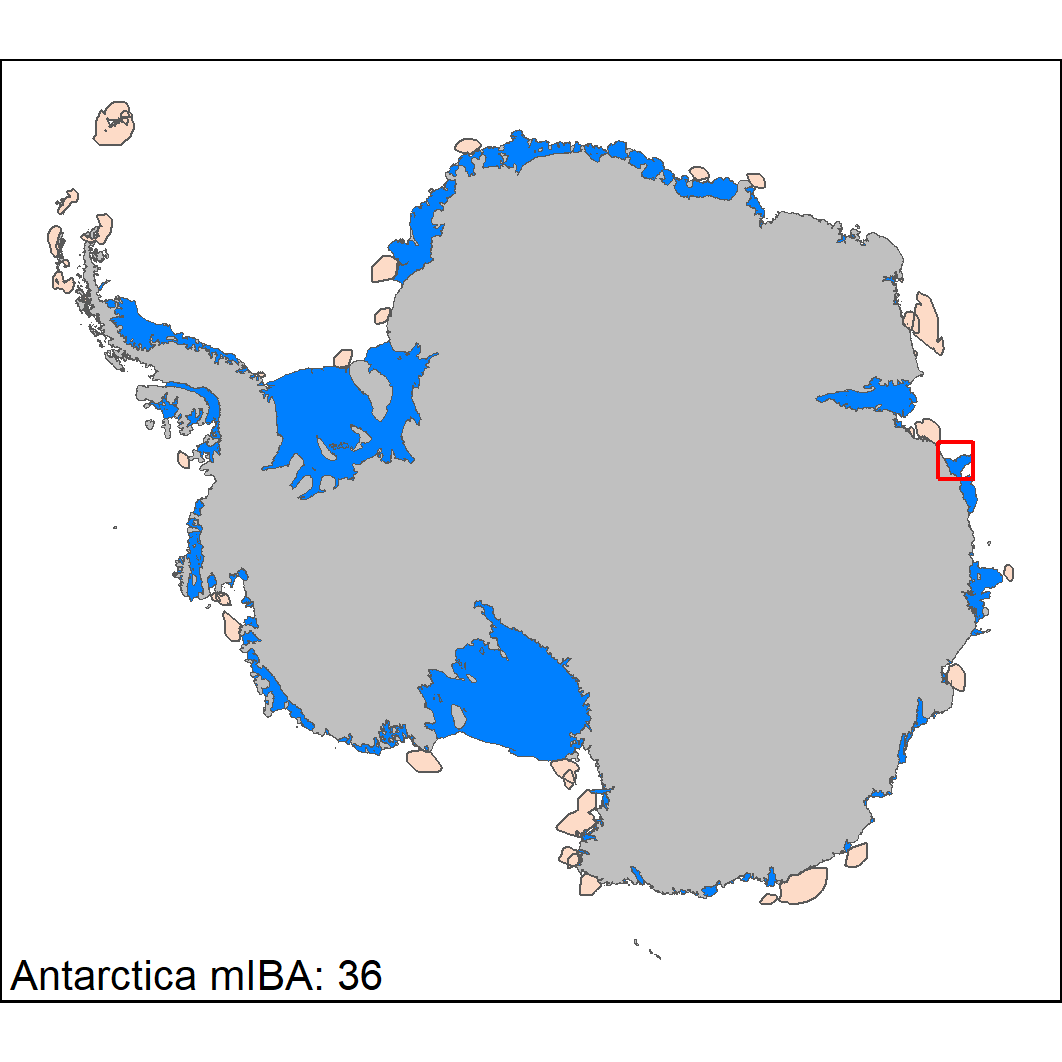


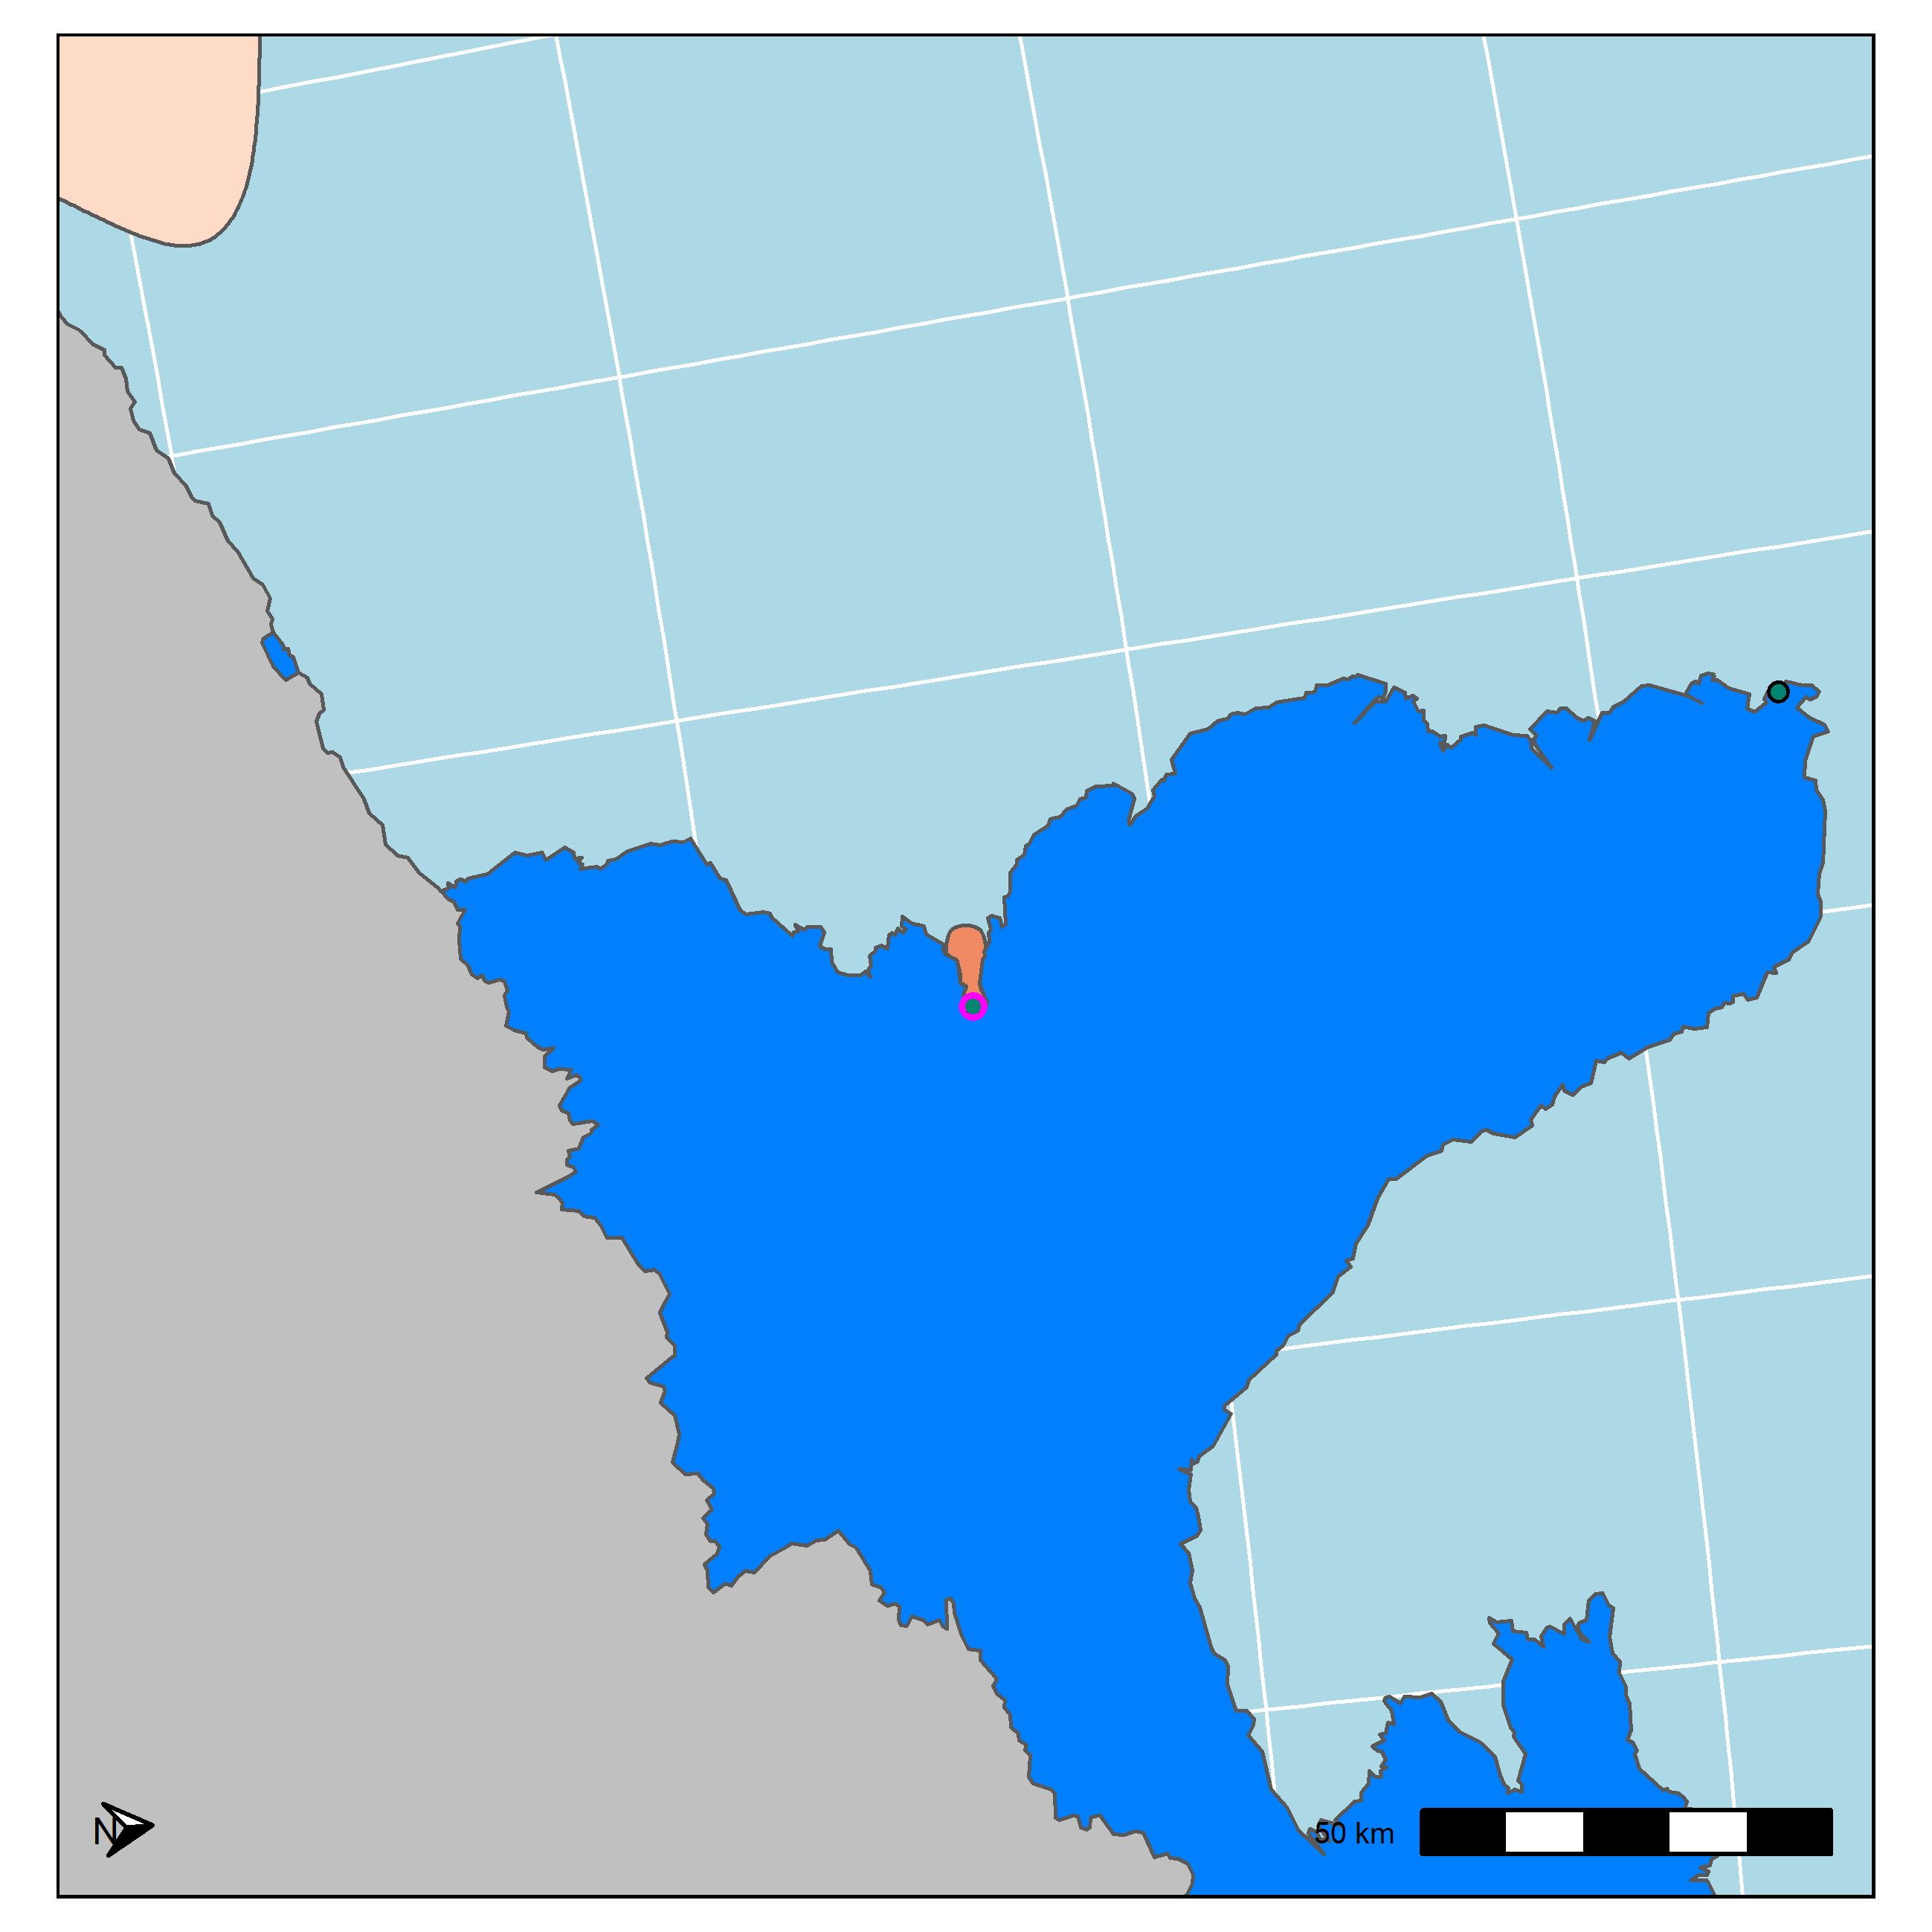


Figure A36.1: Focal Antarctica marine IBA 36 (orange polygon) for penguins, and other marine IBAs (light orange) for penguins identified during the project. Colonies circled in purple are those whose populations contributed to the marine IBA triggering IBA criteria A4 (>1% of the global population). See Table A36.2.

Table A36.1: Population estimates and count types (those that triggered IBA Criteria A4, >1% of global population) for key penguin species in Antarctic marine IBA 36. Key sources of colony input data associated with this marine IBA are detailed in Table A36.2. Population estimates refer to the lower and upper estimated number of adult breeding pairs likely to be using the marine IBA; derived from summing over all cells from individual colony density distribution surfaces which contributed to the identification of the marine IBA.

| Site code | Species | Count type | Lower | Upper |
| --- | --- | --- | --- | --- |
| 36 | EMP | min | 2716 | 3436 |
| 36 | EMP | max | 2716 | 3436 |
| 36 | EMP | median | 2716 | 3436 |
| 36 | EMP | recent | 2716 | 3436 |

Table A36.2: Population estimates (adult breeding pairs) and count types from individual colony(ies) density distribution surfaces which contributed to the identification of marine IBA: 36. I.e. The lower and upper estimated number of adult breeding pairs from a given colony that may utilise the marine IBA. Note, the lower population estimate represents the lowest estimated number of breeding pairs from a given colony contributing to the delineation of the marine IBA site. The lower population estimate may therefore be zero when only part of the individual colony(ies) density distribution surface contributed to the marine IBA. *The Count Year for the median population estimate indicates the number of yearly population assessments for the given colony. Colony names are given in the ‘Colony Codes’ table at the end of this document.

| Site code | Species | Colony | Count type | Lower | Upper | Count year* |
| --- | --- | --- | --- | --- | --- | --- |
| 36 | EMP | WEIS | min | 2716 | 3436 | 2011 |
| 36 | EMP | WEIS | max | 2716 | 3436 | 2011 |
| 36 | EMP | WEIS | median | 2716 | 3436 | 1 |
| 36 | EMP | WEIS | recent | 2716 | 3436 | 2011 |

# Antarctica marine IBA: 37

| Site code | 37 |
| --- | --- |
| Species | EMP |
| IBA criteria | A4: Congregations |
| Decimal Latitude | -66.514 |
| Decimal Longitude | 93.002 |
| Area (ha) | 12165.48 |
| Area (km2) | 121.6548 |
| MPA Overlap | EARSMPA |
| MPA Type | Proposed |
| MPA Zones | D’Urville Sea-Mertz MPA |


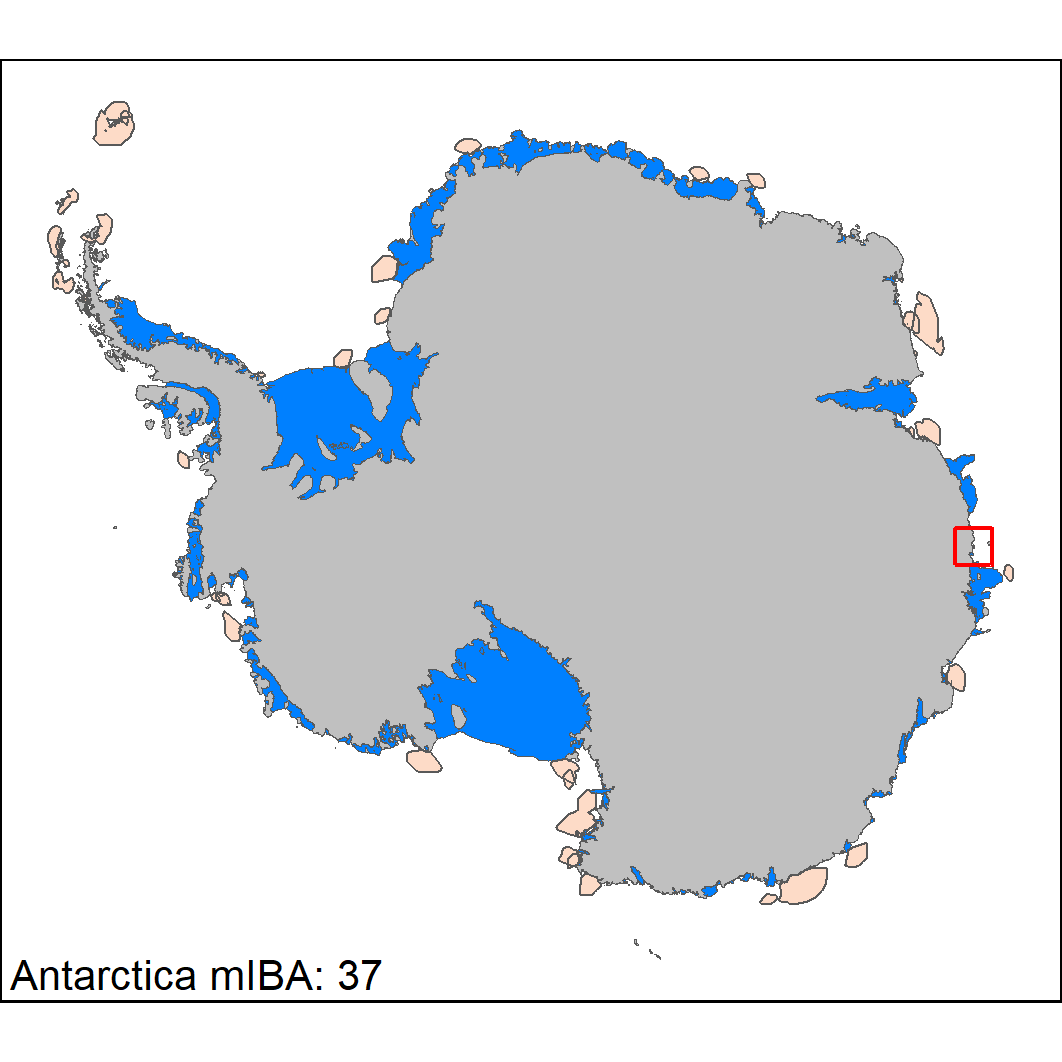


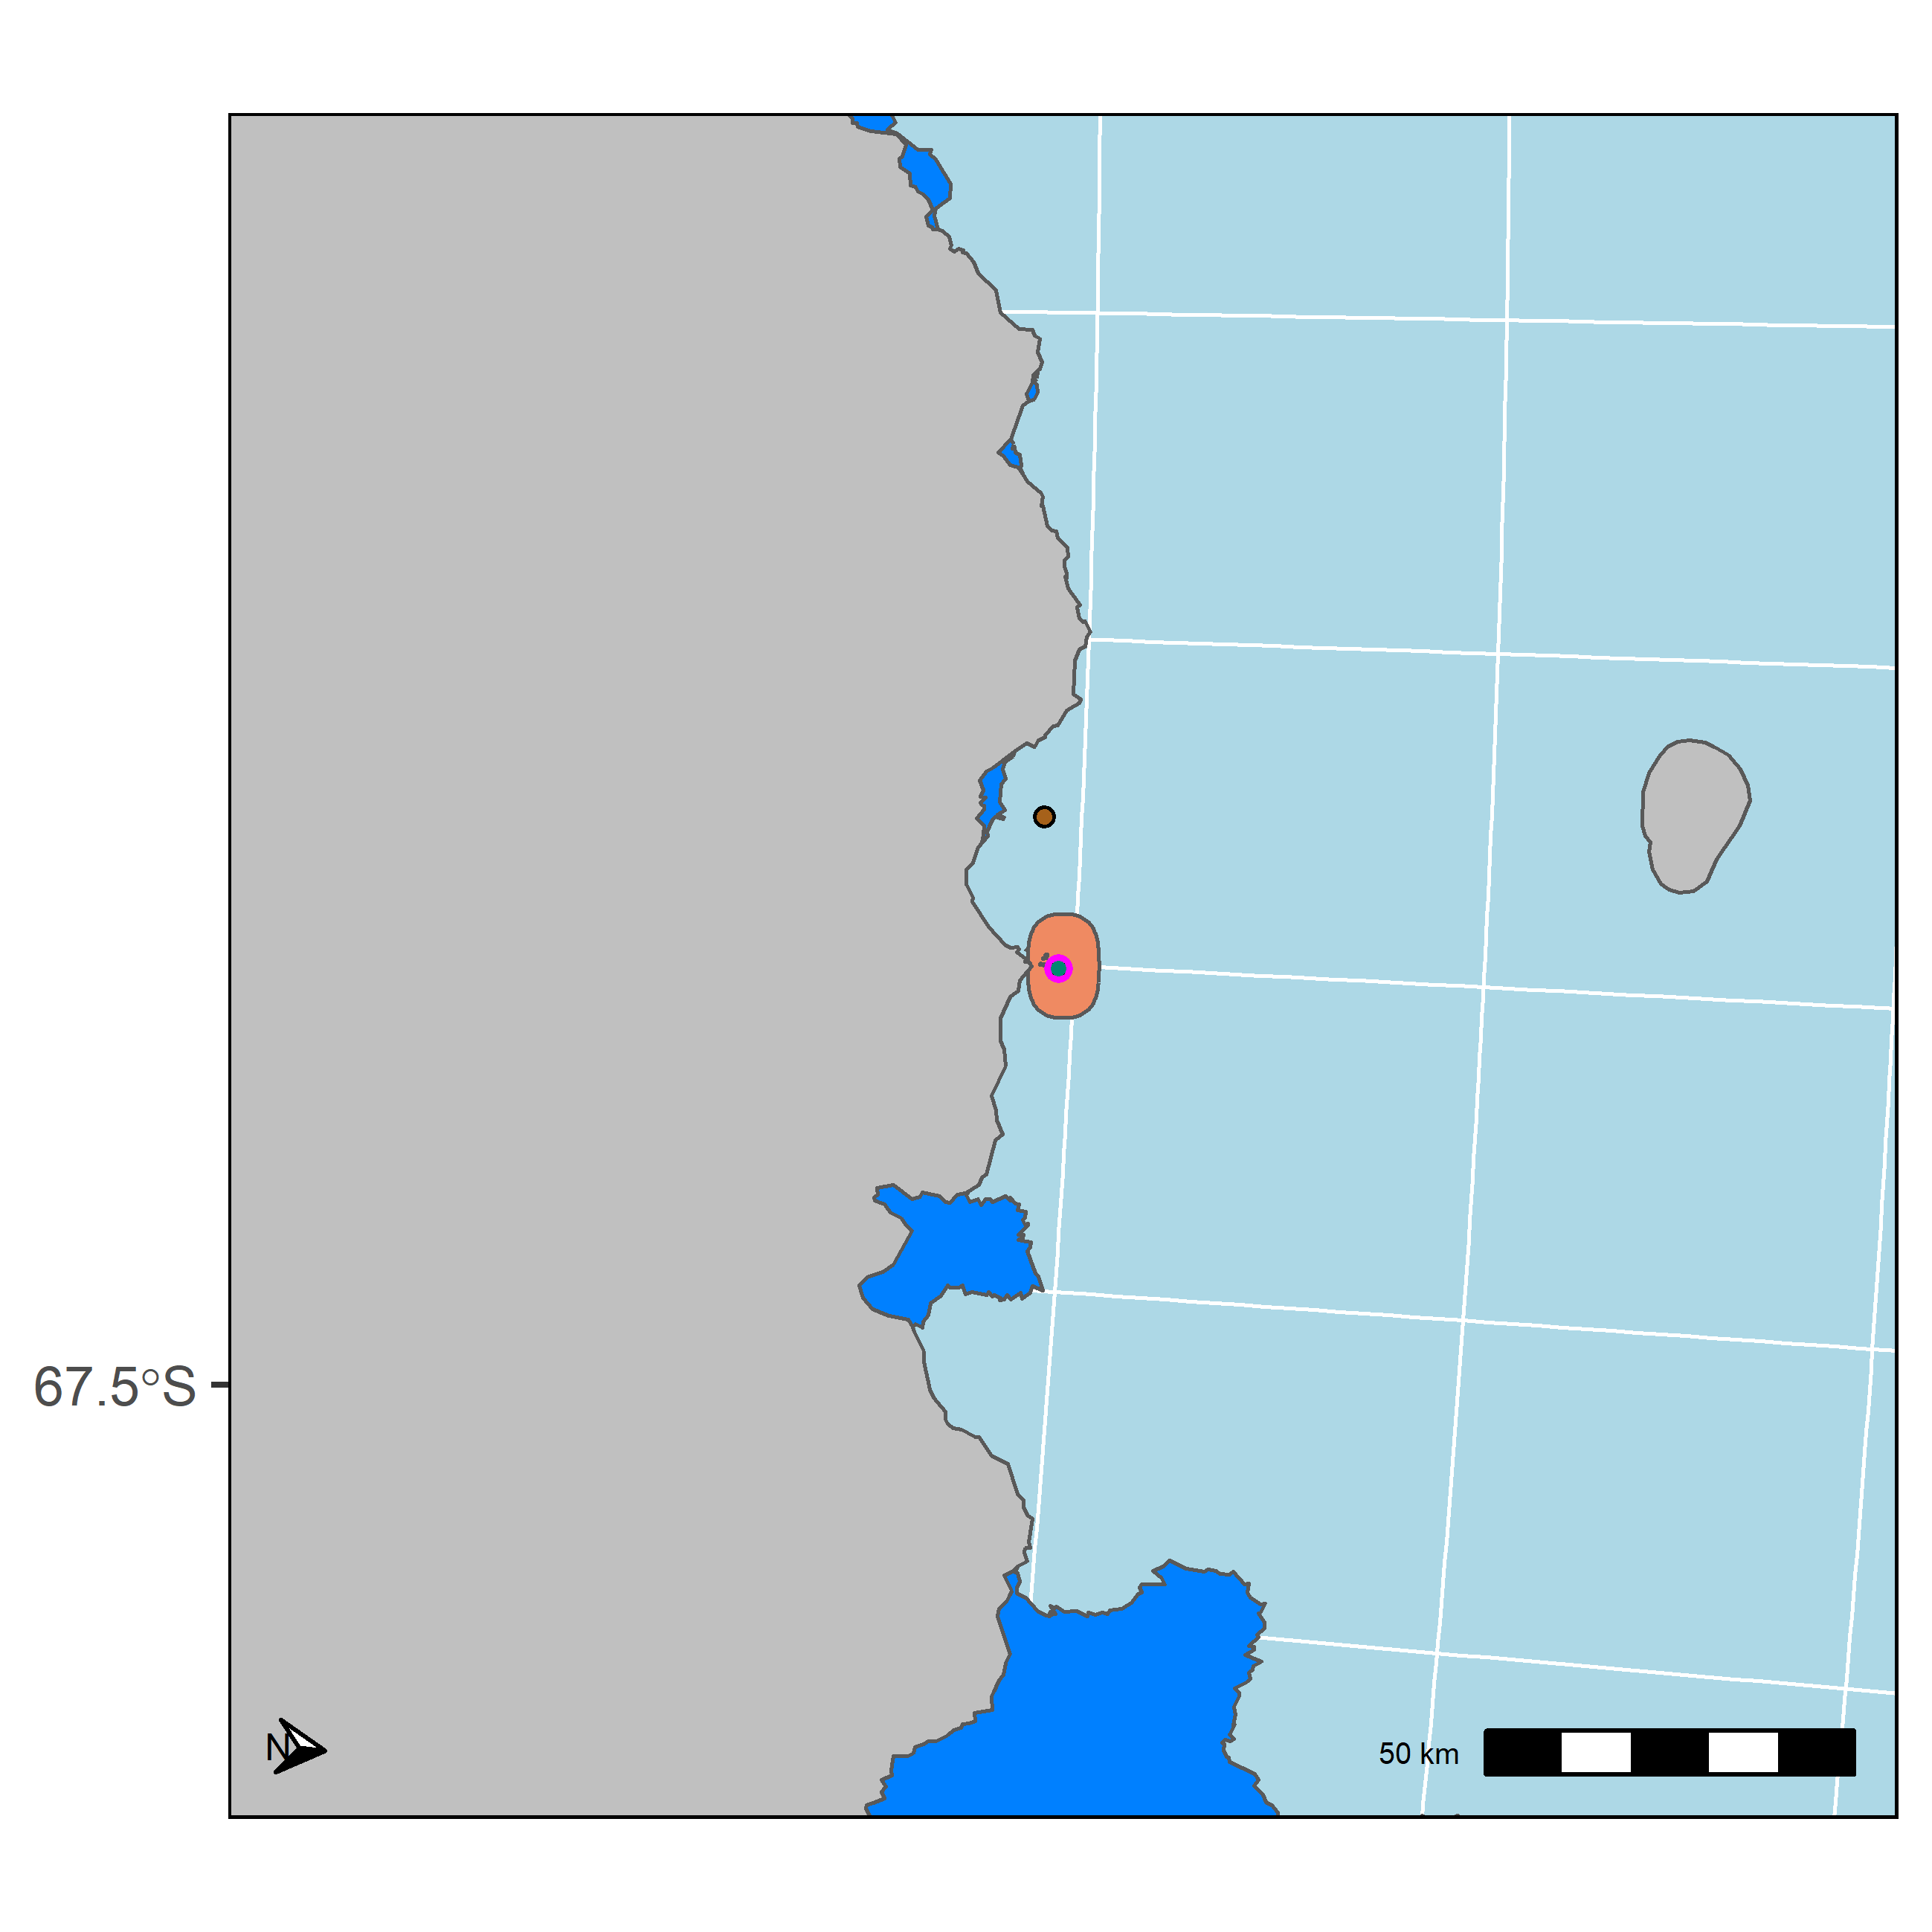


Figure A37.1: Focal Antarctica marine IBA 37 (orange polygon) for penguins, and other marine IBAs (light orange) for penguins identified during the project. Colonies circled in purple are those whose populations contributed to the marine IBA triggering IBA criteria A4 (>1% of the global population). See Table A37.2.

Table A37.1: Population estimates and count types (those that triggered IBA Criteria A4, >1% of global population) for key penguin species in Antarctic marine IBA 37. Key sources of colony input data associated with this marine IBA are detailed in Table A37.2. Population estimates refer to the lower and upper estimated number of adult breeding pairs likely to be using the marine IBA; derived from summing over all cells from individual colony density distribution surfaces which contributed to the identification of the marine IBA.

| Site code | Species | Count type | Lower | Upper |
| --- | --- | --- | --- | --- |
| 37 | EMP | min | 2607 | 3247 |
| 37 | EMP | max | 13649 | 17000 |
| 37 | EMP | median | 7226 | 9000 |
| 37 | EMP | recent | 2607 | 3247 |

Table A37.2: Population estimates (adult breeding pairs) and count types from individual colony(ies) density distribution surfaces which contributed to the identification of marine IBA: 37. I.e. The lower and upper estimated number of adult breeding pairs from a given colony that may utilise the marine IBA. Note, the lower population estimate represents the lowest estimated number of breeding pairs from a given colony contributing to the delineation of the marine IBA site. The lower population estimate may therefore be zero when only part of the individual colony(ies) density distribution surface contributed to the marine IBA. *The Count Year for the median population estimate indicates the number of yearly population assessments for the given colony. Colony names are given in the ‘Colony Codes’ table at the end of this document.

| Site code | Species | Colony | Count type | Lower | Upper | Count year* |
| --- | --- | --- | --- | --- | --- | --- |
| 37 | EMP | HASW | min | 2607 | 3247 | 2009 |
| 37 | EMP | HASW | max | 13649 | 17000 | 1970 |
| 37 | EMP | HASW | median | 7226 | 9000 | 3 |
| 37 | EMP | HASW | recent | 2607 | 3247 | 2009 |

# Antarctica marine IBA: 38

| Site code | 38 |
| --- | --- |
| Species | EMP |
| IBA criteria | A4: Congregations |
| Decimal Latitude | -64.632 |
| Decimal Longitude | 95.826 |
| Area (ha) | 366193.2 |
| Area (km2) | 3661.932 |
| MPA Overlap | EARSMPA |
| MPA Type | Proposed |
| MPA Zones | D’Urville Sea-Mertz MPA |


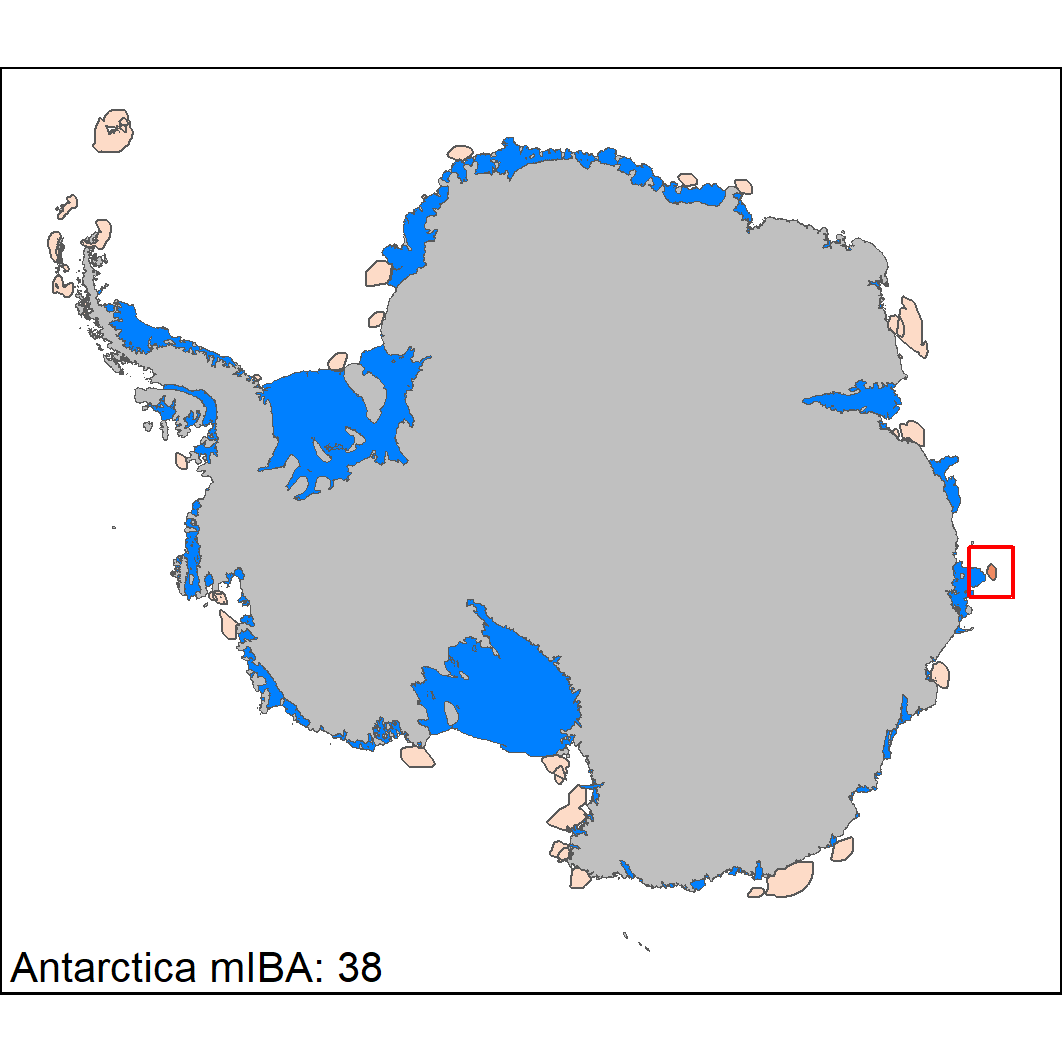


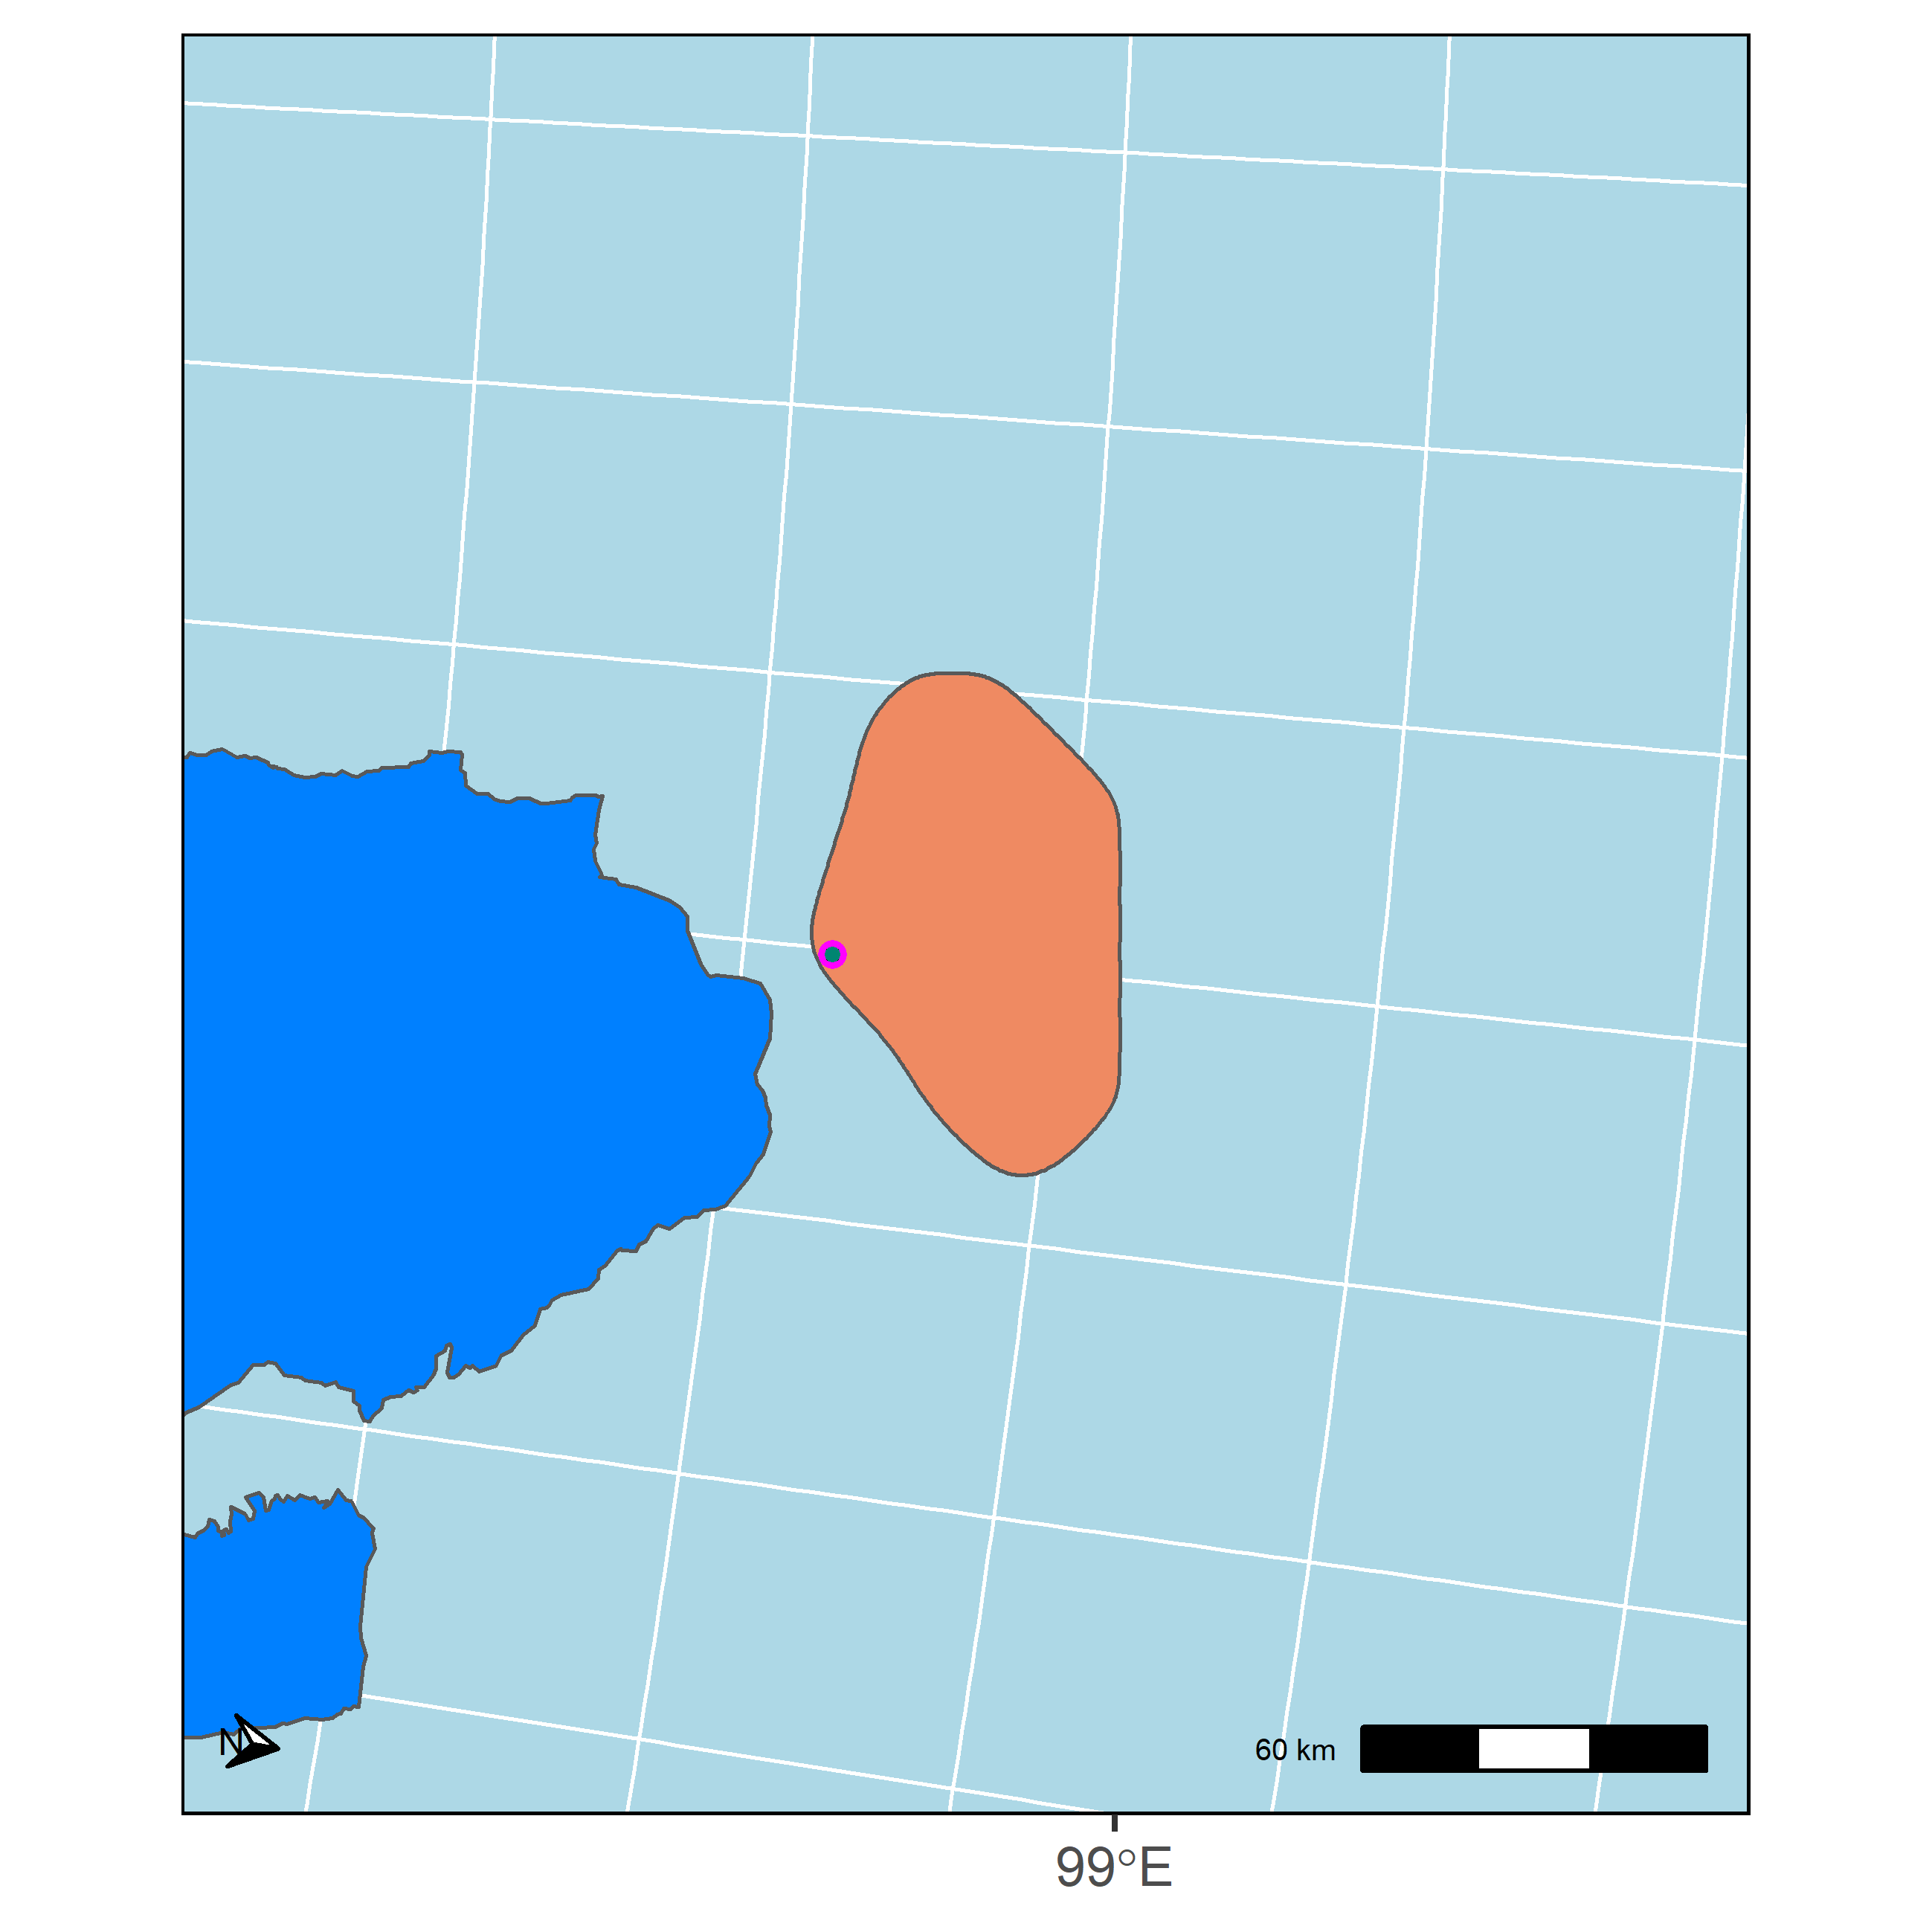


Figure A38.1: Focal Antarctica marine IBA 38 (orange polygon) for penguins, and other marine IBAs (light orange) for penguins identified during the project. Colonies circled in purple are those whose populations contributed to the marine IBA triggering IBA criteria A4 (>1% of the global population). See Table A38.2.

Table A38.1: Population estimates and count types (those that triggered IBA Criteria A4, >1% of global population) for key penguin species in Antarctic marine IBA 38. Key sources of colony input data associated with this marine IBA are detailed in Table A38.2. Population estimates refer to the lower and upper estimated number of adult breeding pairs likely to be using the marine IBA; derived from summing over all cells from individual colony density distribution surfaces which contributed to the identification of the marine IBA.

| Site code | Species | Count type | Lower | Upper |
| --- | --- | --- | --- | --- |
| 38 | EMP | max | 2949 | 6471 |
| 38 | EMP | median | 2614 | 5736 |
| 38 | EMP | recent | 2949 | 6471 |

Table A38.2: Population estimates (adult breeding pairs) and count types from individual colony(ies) density distribution surfaces which contributed to the identification of marine IBA: 38. I.e. The lower and upper estimated number of adult breeding pairs from a given colony that may utilise the marine IBA. Note, the lower population estimate represents the lowest estimated number of breeding pairs from a given colony contributing to the delineation of the marine IBA site. The lower population estimate may therefore be zero when only part of the individual colony(ies) density distribution surface contributed to the marine IBA. *The Count Year for the median population estimate indicates the number of yearly population assessments for the given colony. Colony names are given in the ‘Colony Codes’ table at the end of this document.

| Site code | Species | Colony | Count type | Lower | Upper | Count year* |
| --- | --- | --- | --- | --- | --- | --- |
| 38 | EMP | SHAC | max | 2949 | 6471 | 2009 |
| 38 | EMP | SHAC | median | 2614 | 5736 | 2 |
| 38 | EMP | SHAC | recent | 2949 | 6471 | 2009 |

# Antarctica marine IBA: 39

| Site code | 39 |
| --- | --- |
| Species | ADP |
| IBA criteria | A4: Congregations |
| Decimal Latitude | -66.056 |
| Decimal Longitude | 109.535 |
| Area (ha) | 1205384 |
| Area (km2) | 12053.84 |
| MPA Overlap |  |
| MPA Type | NA |
| MPA Zones |  |


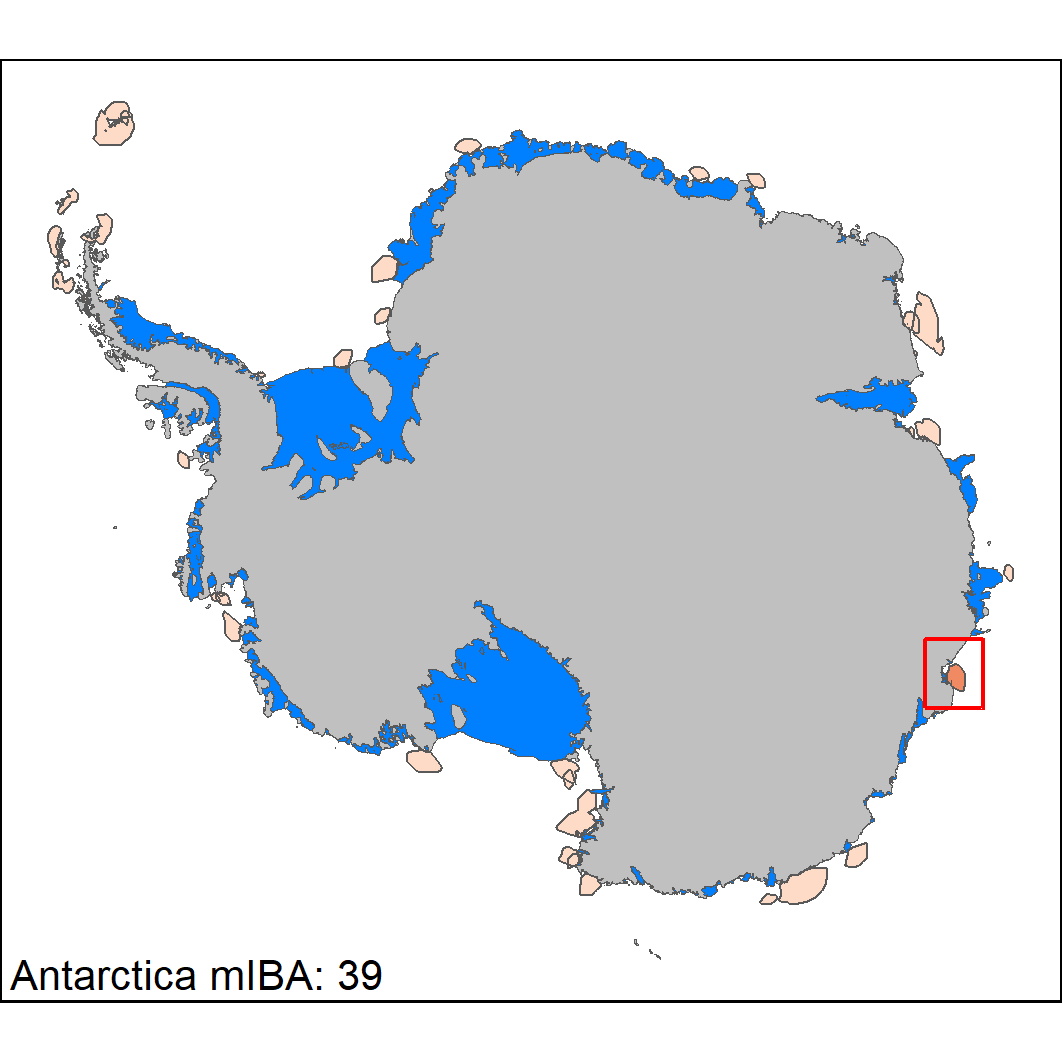


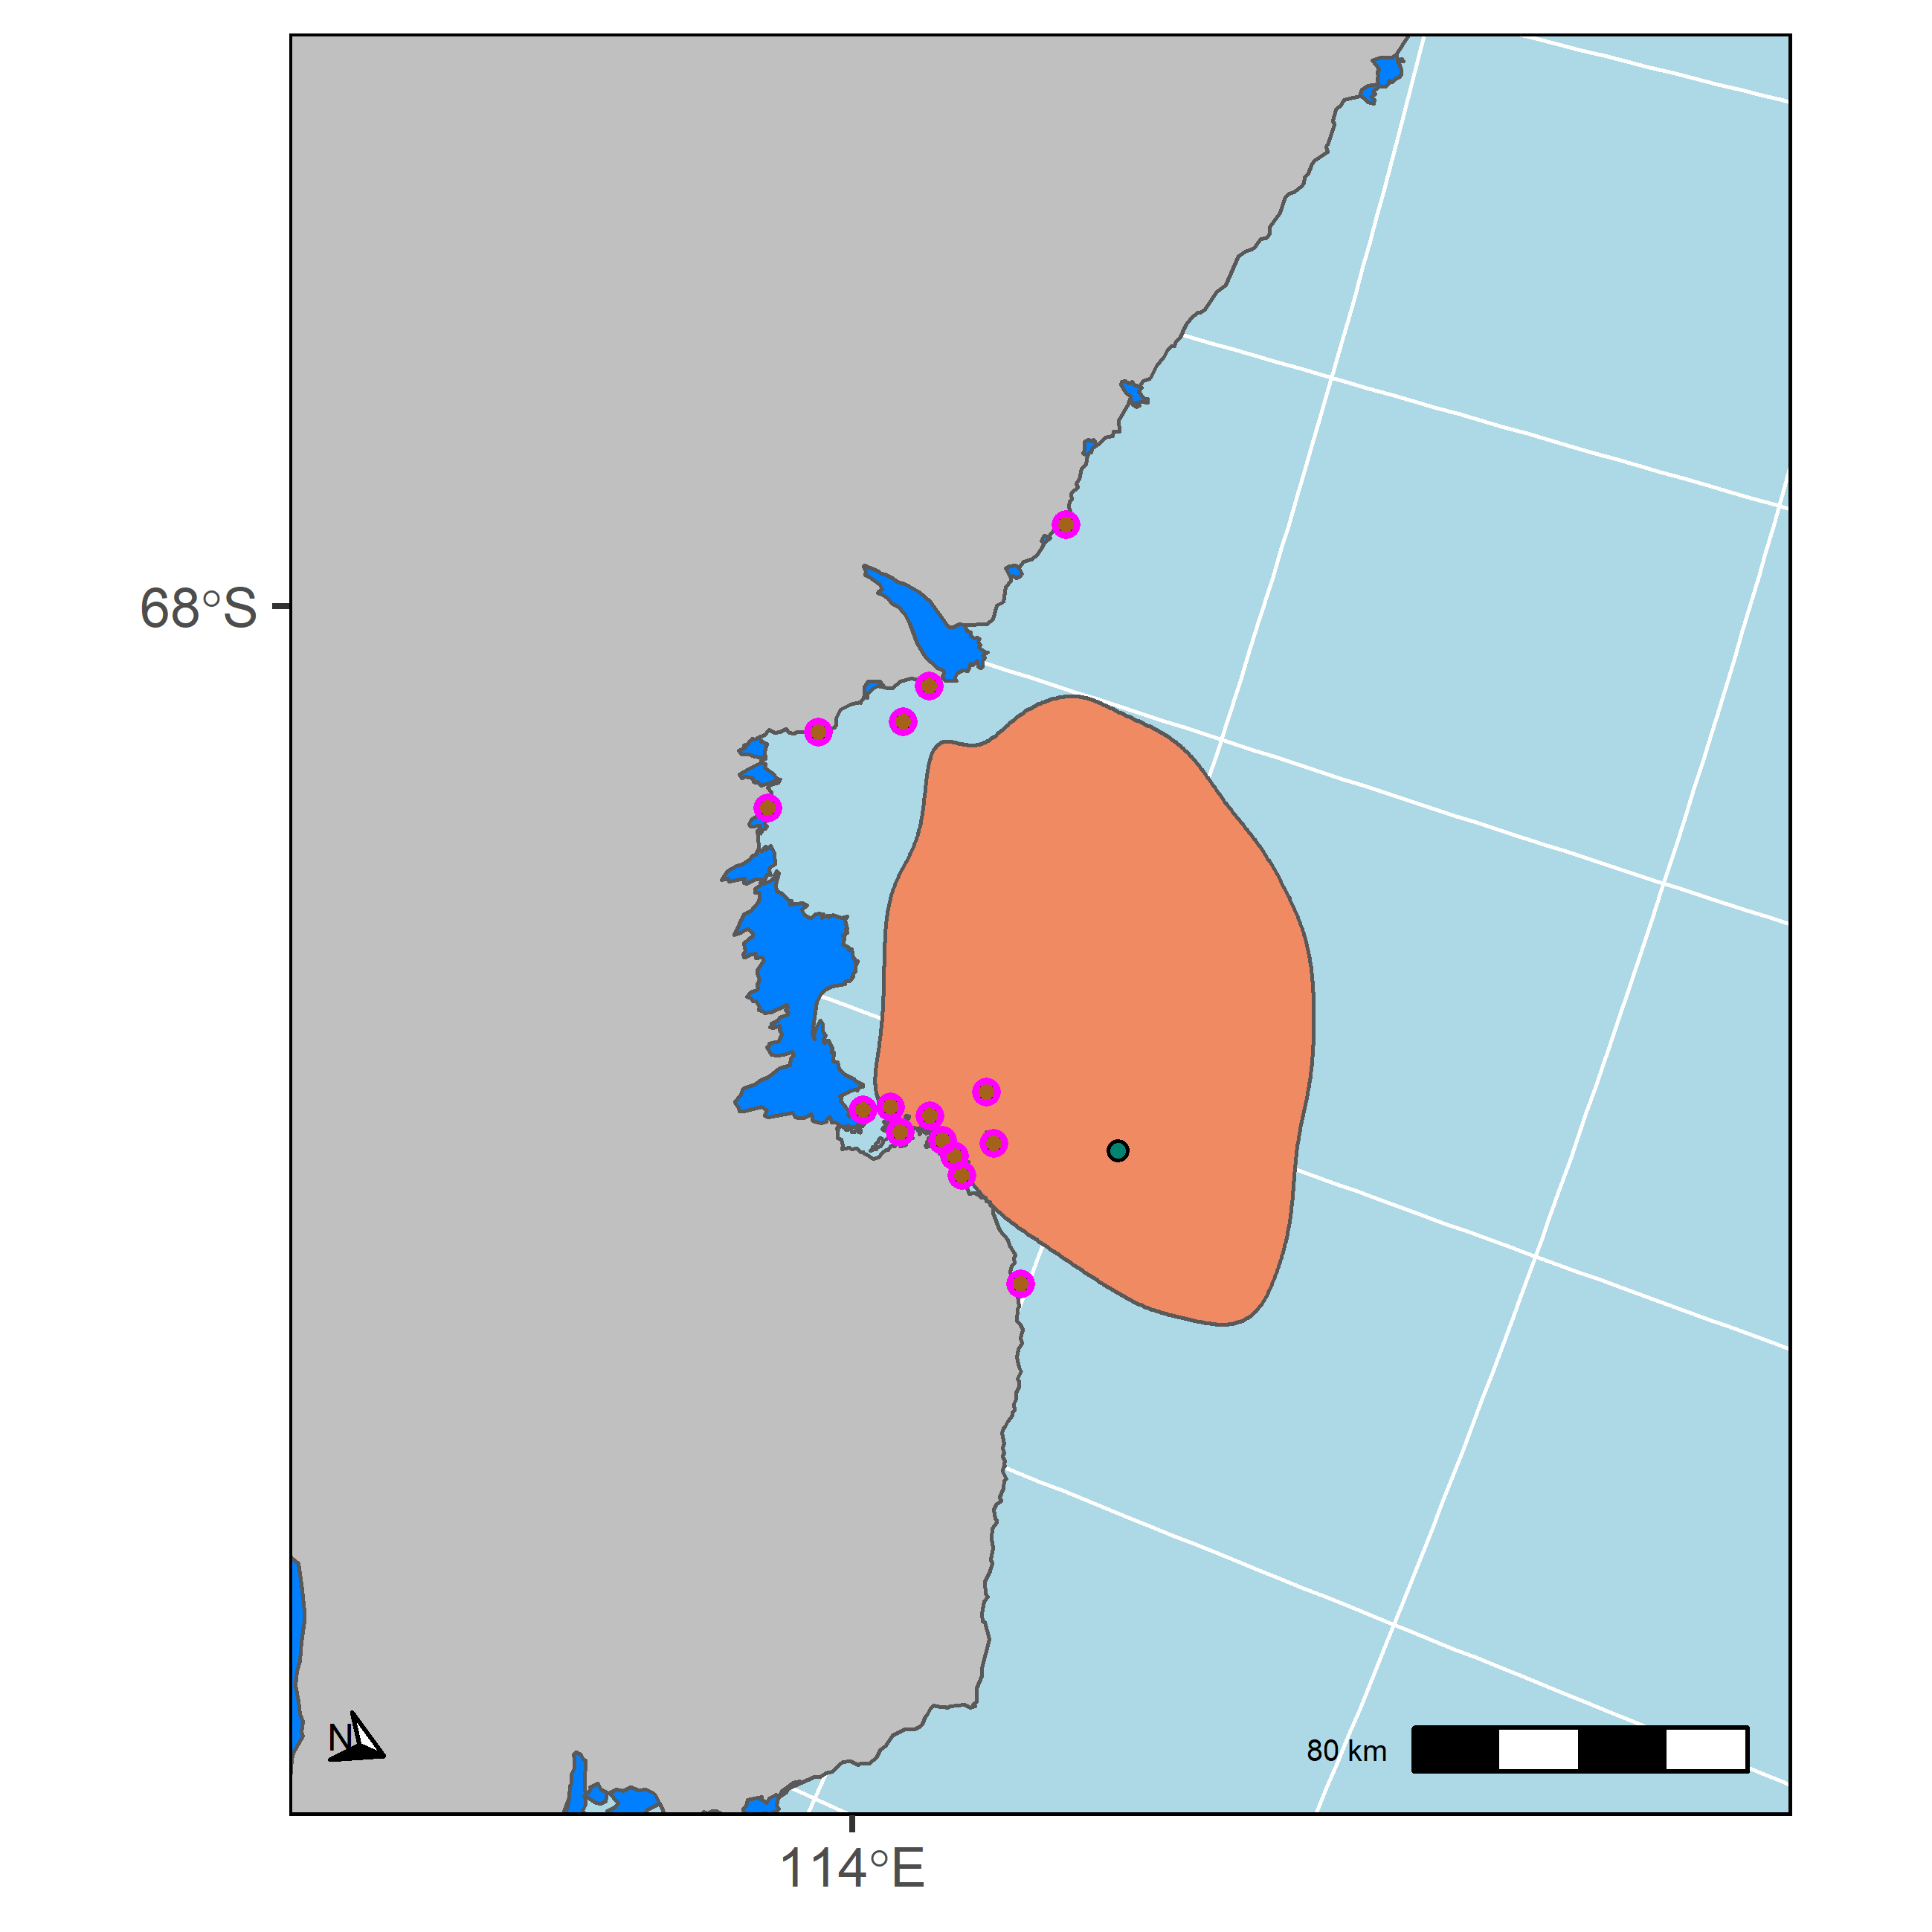


Figure A39.1: Focal Antarctica marine IBA 39 (orange polygon) for penguins, and other marine IBAs (light orange) for penguins identified during the project. Colonies circled in purple are those whose populations contributed to the marine IBA triggering IBA criteria A4 (>1% of the global population). See Table A39.2.

Table A39.1: Population estimates and count types (those that triggered IBA Criteria A4, >1% of global population) for key penguin species in Antarctic marine IBA 39. Key sources of colony input data associated with this marine IBA are detailed in Table A39.2. Population estimates refer to the lower and upper estimated number of adult breeding pairs likely to be using the marine IBA; derived from summing over all cells from individual colony density distribution surfaces which contributed to the identification of the marine IBA.

| Site code | Species | Count type | Lower | Upper |
| --- | --- | --- | --- | --- |
| 39 | ADP | max | 37900 | 98239 |
| 39 | ADP | median | 37900 | 74775 |
| 39 | ADP | recent | 37900 | 93507 |

Table A39.2: Population estimates (adult breeding pairs) and count types from individual colony(ies) density distribution surfaces which contributed to the identification of marine IBA: 39. I.e. The lower and upper estimated number of adult breeding pairs from a given colony that may utilise the marine IBA. Note, the lower population estimate represents the lowest estimated number of breeding pairs from a given colony contributing to the delineation of the marine IBA site. The lower population estimate may therefore be zero when only part of the individual colony(ies) density distribution surface contributed to the marine IBA. *The Count Year for the median population estimate indicates the number of yearly population assessments for the given colony. Colony names are given in the ‘Colony Codes’ table at the end of this document.

| Site code | Species | Colony | Count type | Lower | Upper | Count year* |
| --- | --- | --- | --- | --- | --- | --- |
| 39 | ADP | BALA | max | 44 | 104 | 2011 |
| 39 | ADP | BALA | median | 44 | 104 | 1 |
| 39 | ADP | BALA | recent | 44 | 104 | 2011 |
| 39 | ADP | BERK | max | 3812 | 12182 | 2011 |
| 39 | ADP | BERK | median | 1843 | 5888 | 3 |
| 39 | ADP | BERK | recent | 3812 | 12182 | 2011 |
| 39 | ADP | CHAP | max | 1753 | 5780 | 1989 |
| 39 | ADP | CHAP | median | 1394 | 4597 | 3 |
| 39 | ADP | CHAP | recent | 1394 | 4597 | 2011 |
| 39 | ADP | DAVI | max | 1474 | 7284 | 1993 |
| 39 | ADP | DAVI | median | 1448 | 7154 | 2 |
| 39 | ADP | DAVI | recent | 1421 | 7023 | 2011 |
| 39 | ADP | HOLL | max | 9613 | 30514 | 2011 |
| 39 | ADP | HOLL | median | 7425 | 23568 | 2 |
| 39 | ADP | HOLL | recent | 9613 | 30514 | 2011 |
| 39 | ADP | IVAN | max | 901 | 3737 | 2009 |
| 39 | ADP | IVAN | median | 901 | 3737 | 1 |
| 39 | ADP | IVAN | recent | 901 | 3737 | 2009 |
| 39 | ADP | MALL | max | 528 | 2799 | 2011 |
| 39 | ADP | MALL | median | 314 | 1663 | 2 |
| 39 | ADP | MALL | recent | 528 | 2799 | 2011 |
| 39 | ADP | MERR | max | 16 | 300 | 2010 |
| 39 | ADP | MERR | median | 12 | 234 | 2 |
| 39 | ADP | MERR | recent | 16 | 300 | 2010 |
| 39 | ADP | MIDG | max | 3145 | 10237 | 1989 |
| 39 | ADP | MIDG | median | 1939 | 6311 | 3 |
| 39 | ADP | MIDG | recent | 1939 | 6311 | 2011 |
| 39 | ADP | NEIS | max | 530 | 1316 | 2011 |
| 39 | ADP | NEIS | median | 223 | 554 | 3 |
| 39 | ADP | NEIS | recent | 530 | 1316 | 2011 |
| 39 | ADP | NUTT | max | 296 | 1499 | 2010 |
| 39 | ADP | NUTT | median | 255 | 1287 | 2 |
| 39 | ADP | NUTT | recent | 212 | 1074 | 2011 |
| 39 | ADP | ODBE | max | 3433 | 10132 | 1990 |
| 39 | ADP | ODBE | median | 3202 | 9449 | 2 |
| 39 | ADP | ODBE | recent | 2970 | 8766 | 2011 |
| 39 | ADP | PISL | max | 9615 | 29049 | 2011 |
| 39 | ADP | PISL | median | 6459 | 19513 | 3 |
| 39 | ADP | PISL | recent | 9615 | 29049 | 2011 |
| 39 | ADP | SHLY | max | 4170 | 13658 | 2011 |
| 39 | ADP | SHLY | median | 4048 | 13260 | 2 |
| 39 | ADP | SHLY | recent | 4170 | 13658 | 2011 |
| 39 | ADP | WHTY | max | 2907 | 9379 | 2011 |
| 39 | ADP | WHTY | median | 2527 | 8153 | 3 |
| 39 | ADP | WHTY | recent | 2907 | 9379 | 2011 |

# Antarctica marine IBA: 40

| Site code | 40 |
| --- | --- |
| Species | EMP |
| IBA criteria | A4: Congregations |
| Decimal Latitude | -65.516 |
| Decimal Longitude | 134.718 |
| Area (ha) | 1246963 |
| Area (km2) | 12469.63 |
| MPA Overlap | EARSMPA |
| MPA Type | Proposed |
| MPA Zones | Drygalski MPA |


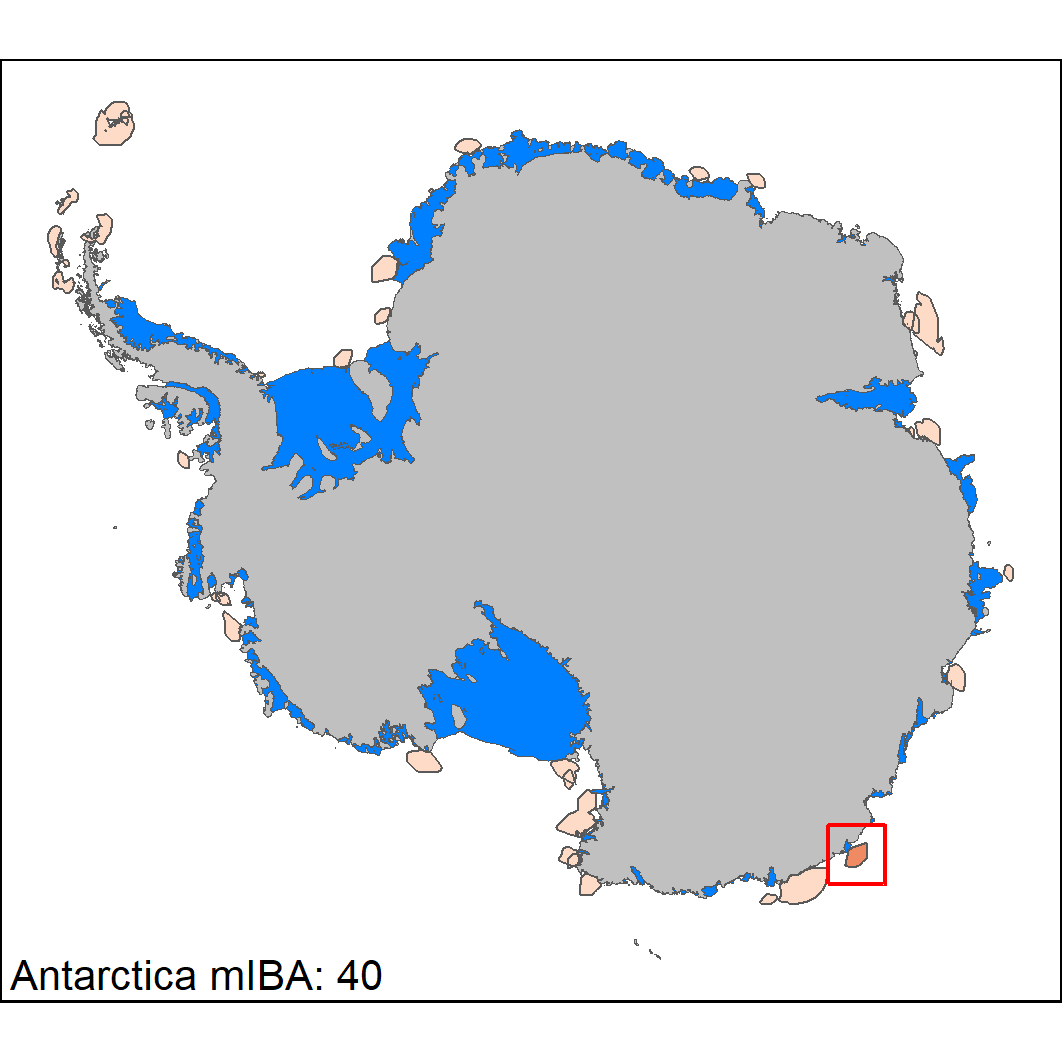


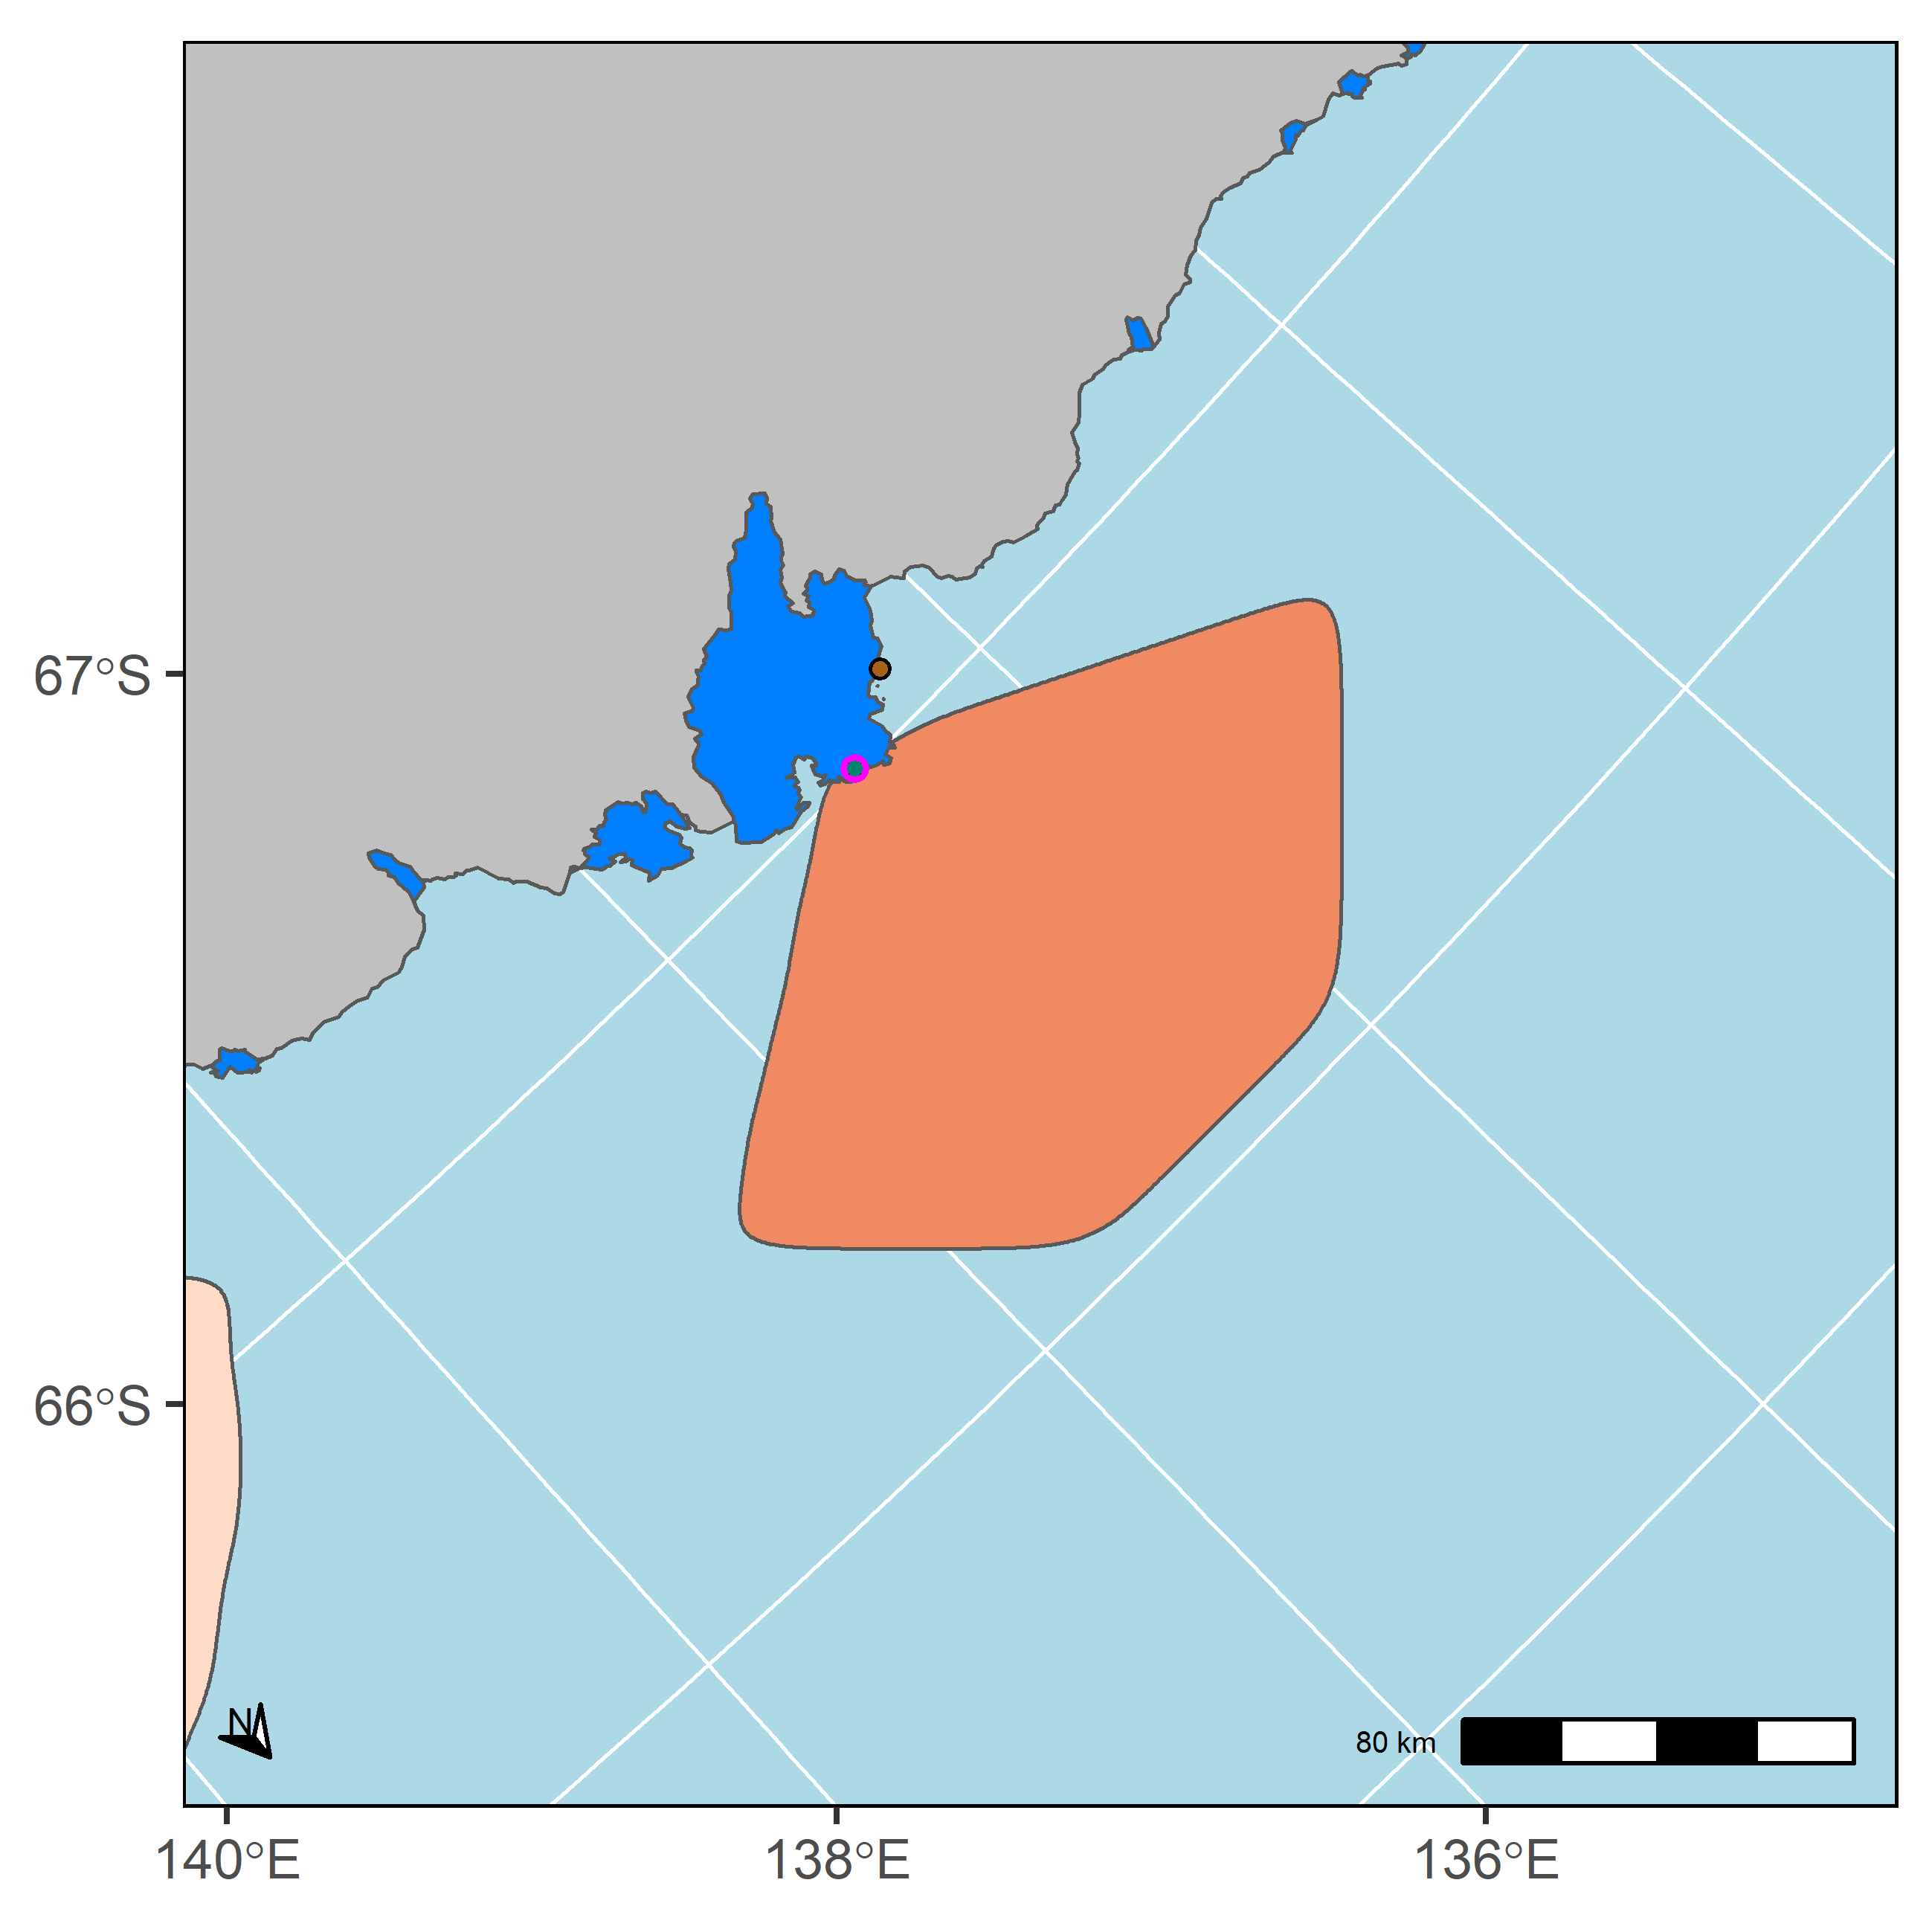


Figure A40.1: Focal Antarctica marine IBA 40 (orange polygon) for penguins, and other marine IBAs (light orange) for penguins identified during the project. Colonies circled in purple are those whose populations contributed to the marine IBA triggering IBA criteria A4 (>1% of the global population). See Table A40.2.

Table A40.1: Population estimates and count types (those that triggered IBA Criteria A4, >1% of global population) for key penguin species in Antarctic marine IBA 40. Key sources of colony input data associated with this marine IBA are detailed in Table A40.2. Population estimates refer to the lower and upper estimated number of adult breeding pairs likely to be using the marine IBA; derived from summing over all cells from individual colony density distribution surfaces which contributed to the identification of the marine IBA.

| Site code | Species | Count type | Lower | Upper |
| --- | --- | --- | --- | --- |
| 40 | EMP | min | 2686 | 12476 |
| 40 | EMP | max | 2686 | 12476 |
| 40 | EMP | median | 2686 | 12476 |
| 40 | EMP | recent | 2686 | 12476 |

Table A40.2: Population estimates (adult breeding pairs) and count types from individual colony(ies) density distribution surfaces which contributed to the identification of marine IBA: 40. I.e. The lower and upper estimated number of adult breeding pairs from a given colony that may utilise the marine IBA. Note, the lower population estimate represents the lowest estimated number of breeding pairs from a given colony contributing to the delineation of the marine IBA site. The lower population estimate may therefore be zero when only part of the individual colony(ies) density distribution surface contributed to the marine IBA. *The Count Year for the median population estimate indicates the number of yearly population assessments for the given colony. Colony names are given in the ‘Colony Codes’ table at the end of this document.

| Site code | Species | Colony | Count type | Lower | Upper | Count year* |
| --- | --- | --- | --- | --- | --- | --- |
| 40 | EMP | DIBB | min | 2686 | 12476 | 2009 |
| 40 | EMP | DIBB | max | 2686 | 12476 | 2009 |
| 40 | EMP | DIBB | median | 2686 | 12476 | 1 |
| 40 | EMP | DIBB | recent | 2686 | 12476 | 2009 |

# Antarctica marine IBA: 41

| Site code | 41 |
| --- | --- |
| Species | ADP |
| IBA criteria | A4: Congregations |
| Decimal Latitude | -66.145 |
| Decimal Longitude | 142.121 |
| Area (ha) | 4035212 |
| Area (km2) | 40352.12 |
| MPA Overlap | EARSMPA |
| MPA Type | Proposed |
| MPA Zones | Drygalski MPA |


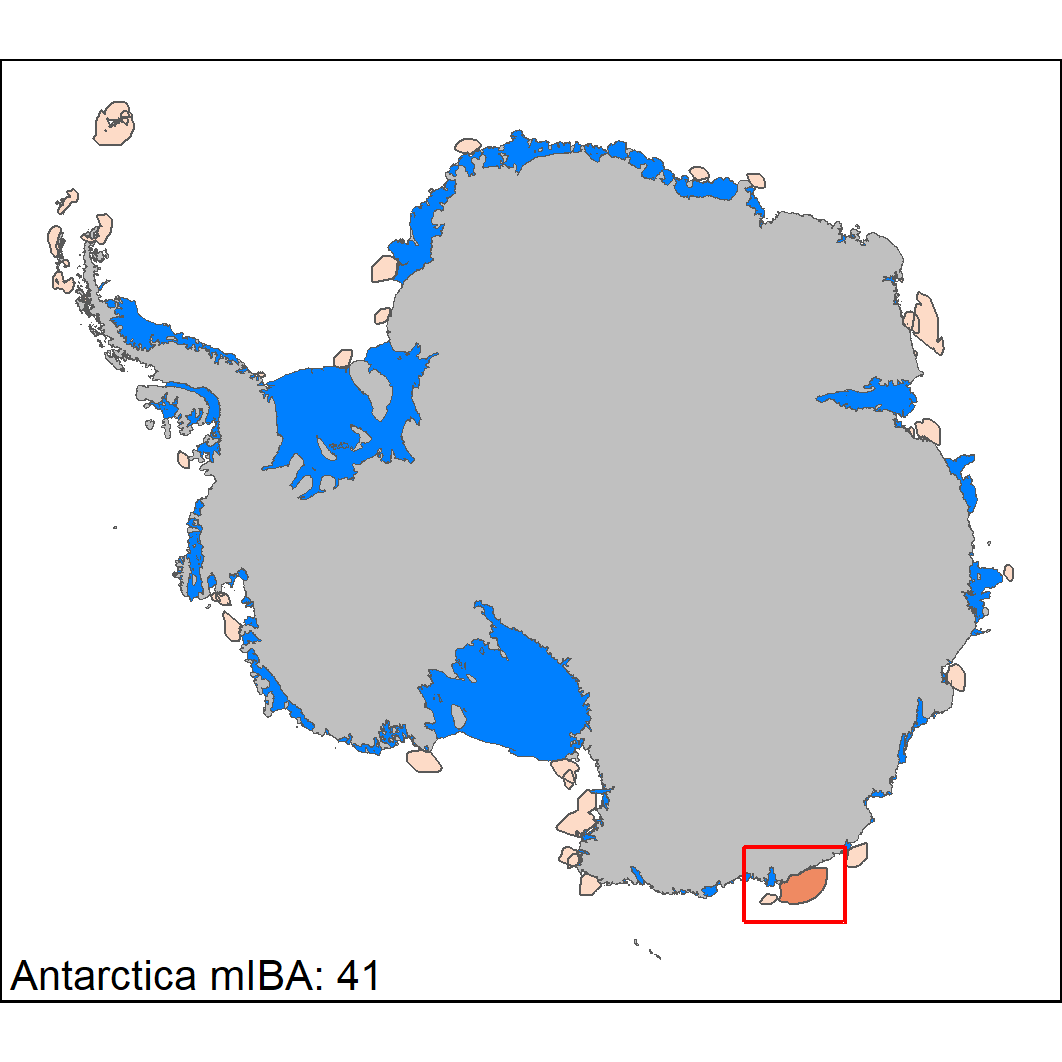


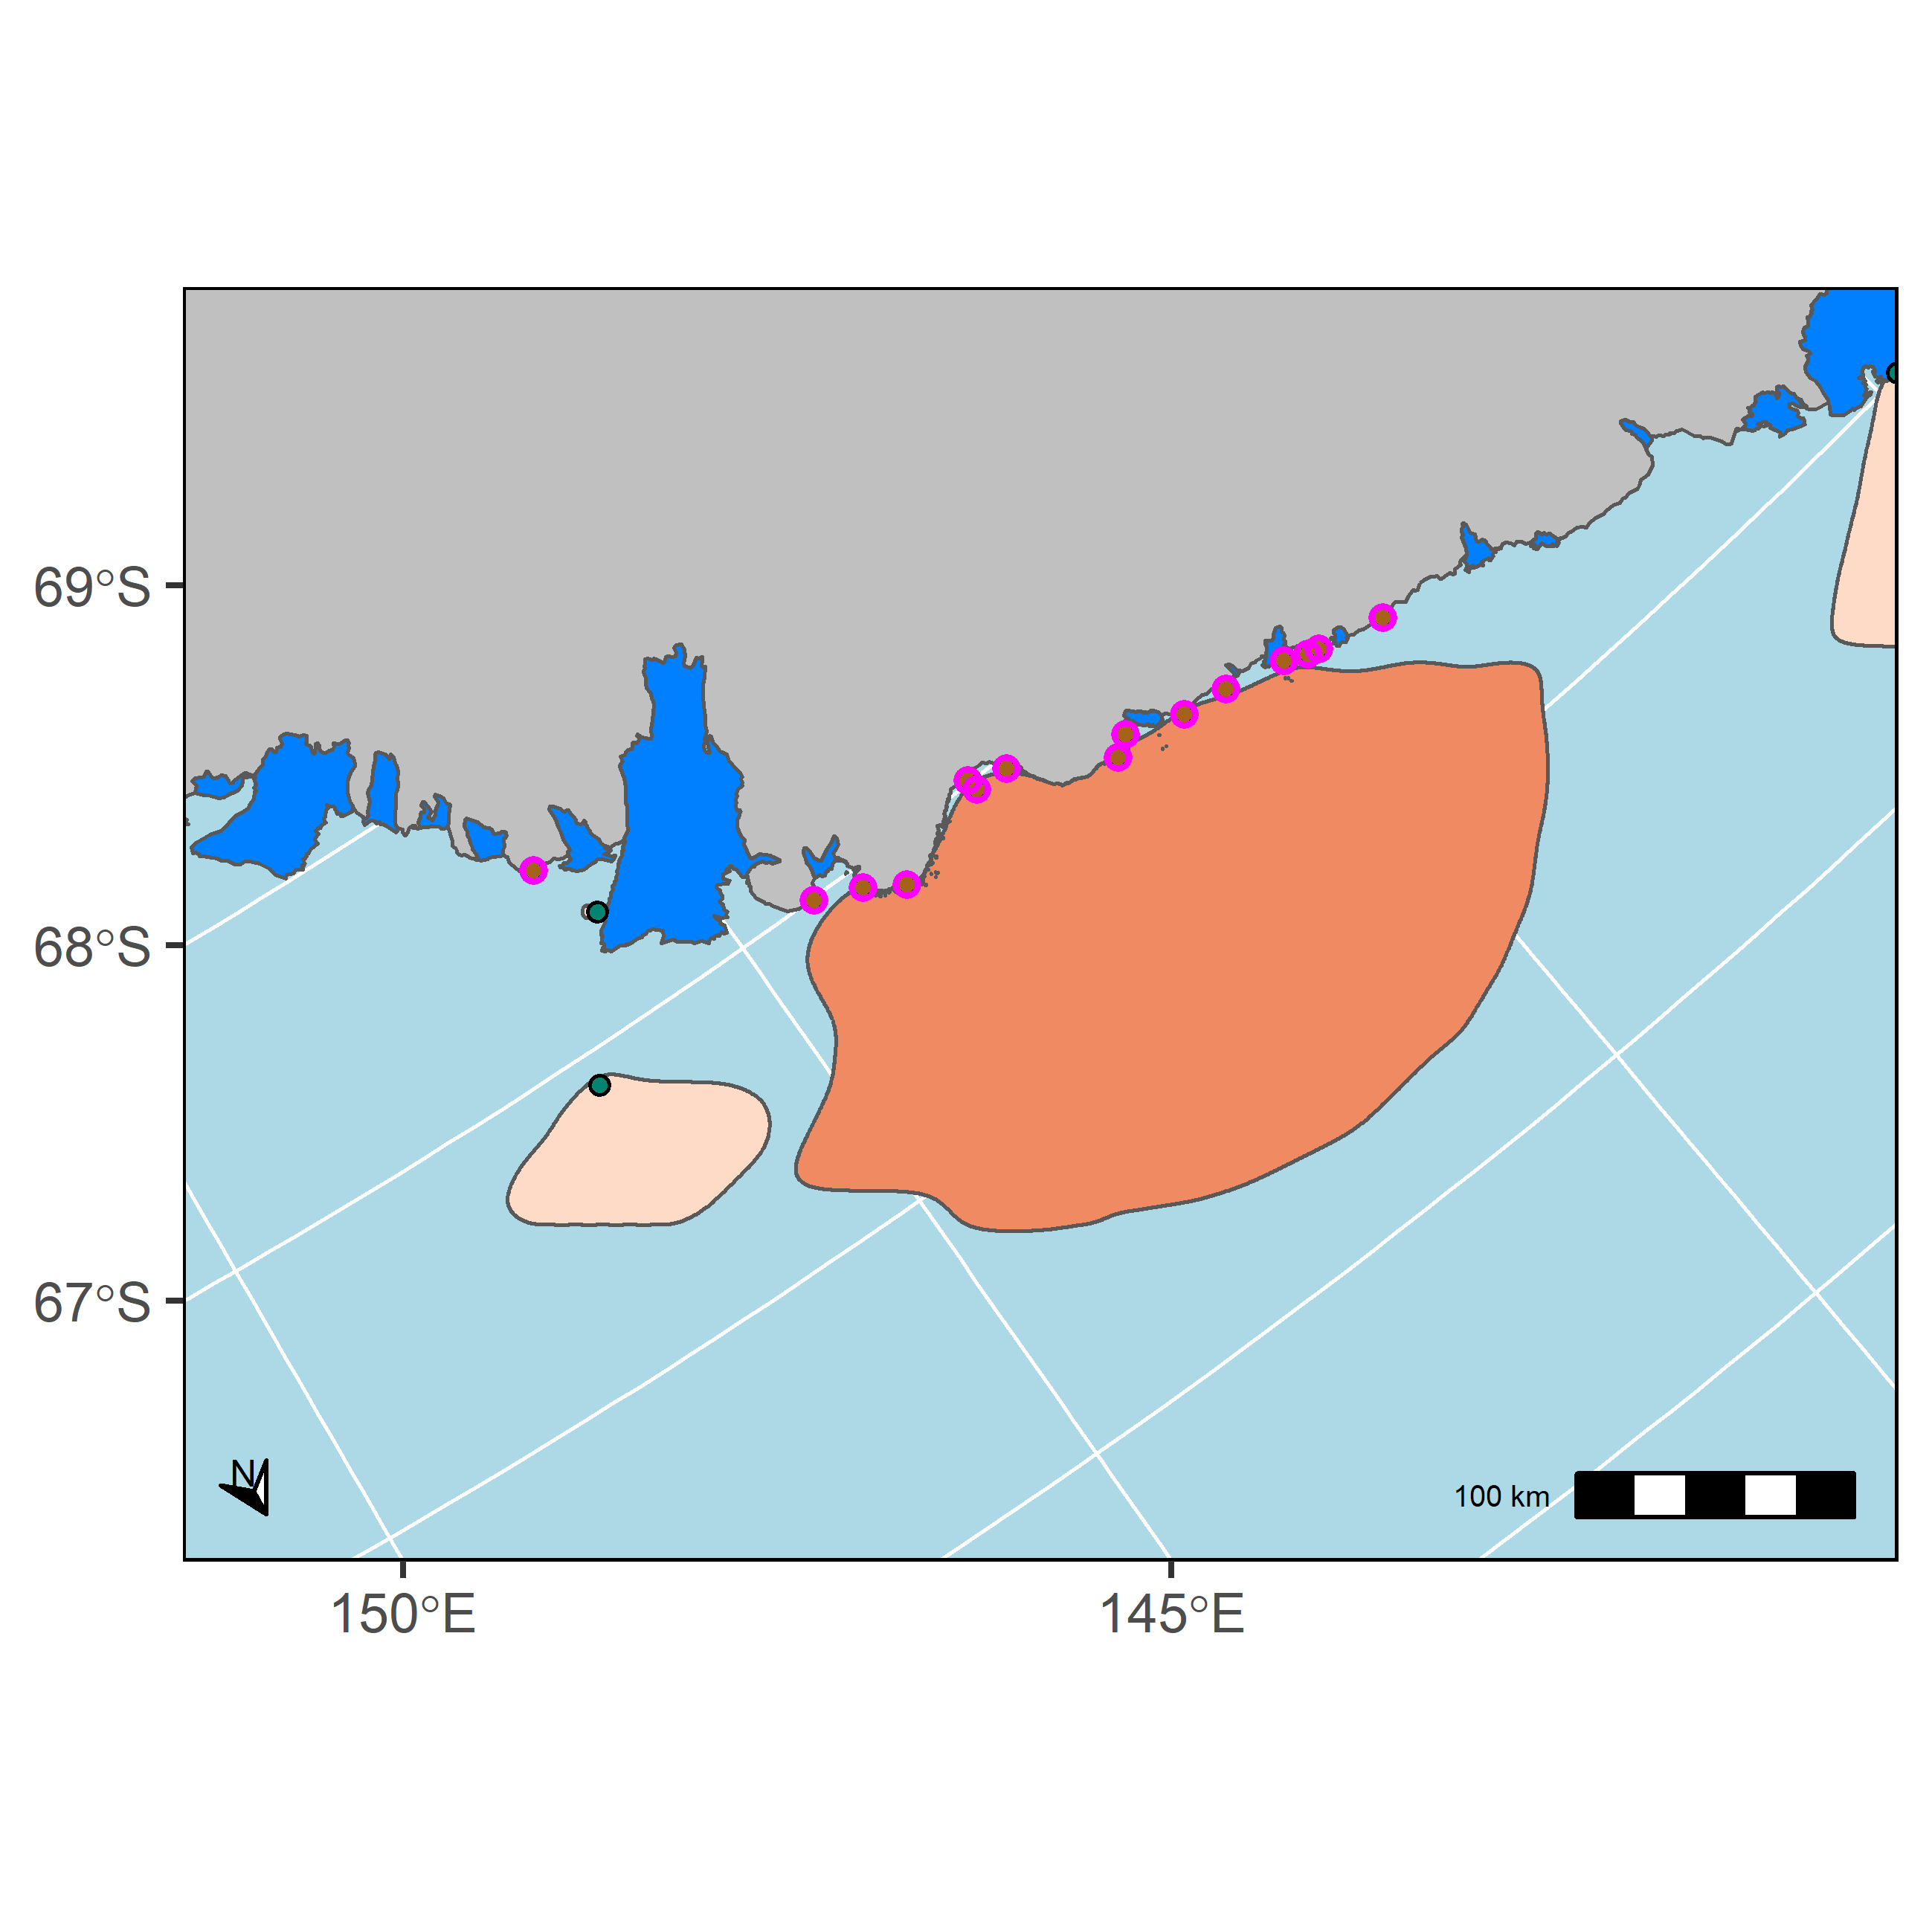


Figure A41.1: Focal Antarctica marine IBA 41 (orange polygon) for penguins, and other marine IBAs (light orange) for penguins identified during the project. Colonies circled in purple are those whose populations contributed to the marine IBA triggering IBA criteria A4 (>1% of the global population). See Table A41.2.

Table A41.1: Population estimates and count types (those that triggered IBA Criteria A4, >1% of global population) for key penguin species in Antarctic marine IBA 41. Key sources of colony input data associated with this marine IBA are detailed in Table A41.2. Population estimates refer to the lower and upper estimated number of adult breeding pairs likely to be using the marine IBA; derived from summing over all cells from individual colony density distribution surfaces which contributed to the identification of the marine IBA.

| Site code | Species | Count type | Lower | Upper |
| --- | --- | --- | --- | --- |
| 41 | ADP | max | 37900 | 148640 |
| 41 | ADP | median | 37900 | 128035 |
| 41 | ADP | recent | 37900 | 145540 |

Table A41.2: Population estimates (adult breeding pairs) and count types from individual colony(ies) density distribution surfaces which contributed to the identification of marine IBA: 41. I.e. The lower and upper estimated number of adult breeding pairs from a given colony that may utilise the marine IBA. Note, the lower population estimate represents the lowest estimated number of breeding pairs from a given colony contributing to the delineation of the marine IBA site. The lower population estimate may therefore be zero when only part of the individual colony(ies) density distribution surface contributed to the marine IBA. *The Count Year for the median population estimate indicates the number of yearly population assessments for the given colony. Colony names are given in the ‘Colony Codes’ table at the end of this document.

| Site code | Species | Colony | Count type | Lower | Upper | Count year* |
| --- | --- | --- | --- | --- | --- | --- |
| 41 | ADP | BIEN | max | 1051 | 29909 | 2011 |
| 41 | ADP | BIEN | median | 445 | 12669 | 3 |
| 41 | ADP | BIEN | recent | 1051 | 29909 | 2011 |
| 41 | ADP | CHUN | max | 497 | 15296 | 1997 |
| 41 | ADP | CHUN | median | 368 | 11333 | 2 |
| 41 | ADP | CHUN | recent | 239 | 7371 | 2010 |
| 41 | ADP | CURZ | max | 1545 | 14694 | 2011 |
| 41 | ADP | CURZ | median | 1437 | 13668 | 2 |
| 41 | ADP | CURZ | recent | 1545 | 14694 | 2011 |
| 41 | ADP | DENI | max | 0 | 12604 | 2011 |
| 41 | ADP | DENI | median | 0 | 12604 | 1 |
| 41 | ADP | DENI | recent | 0 | 12604 | 2011 |
| 41 | ADP | FRAM | max | 0 | 689 | 2011 |
| 41 | ADP | FRAM | median | 0 | 660 | 2 |
| 41 | ADP | FRAM | recent | 0 | 689 | 2011 |
| 41 | ADP | IFOI | max | 0 | 701 | 1998 |
| 41 | ADP | IFOI | median | 0 | 701 | 1 |
| 41 | ADP | IFOI | recent | 0 | 701 | 1998 |
| 41 | ADP | JANE | max | 0 | 1352 | 2011 |
| 41 | ADP | JANE | median | 0 | 1352 | 1 |
| 41 | ADP | JANE | recent | 0 | 1352 | 2011 |
| 41 | ADP | JULE | max | 2747 | 56399 | 2011 |
| 41 | ADP | JULE | median | 2427 | 49829 | 2 |
| 41 | ADP | JULE | recent | 2747 | 56399 | 2011 |
| 41 | ADP | MACK | max | 2 | 80360 | 2011 |
| 41 | ADP | MACK | median | 2 | 80360 | 1 |
| 41 | ADP | MACK | recent | 2 | 80360 | 2011 |
| 41 | ADP | PGEO | max | 2011 | 36668 | 1998 |
| 41 | ADP | PGEO | median | 1702 | 31024 | 2 |
| 41 | ADP | PGEO | recent | 2011 | 36668 | 1998 |
| 41 | ADP | PIGE | max | 1 | 64607 | 2011 |
| 41 | ADP | PIGE | median | 1 | 64607 | 1 |
| 41 | ADP | PIGE | recent | 1 | 64607 | 2011 |
| 41 | ADP | PMAR | max | 2953 | 32630 | 2011 |
| 41 | ADP | PMAR | median | 2535 | 28013 | 2 |
| 41 | ADP | PMAR | recent | 2953 | 32630 | 2011 |
| 41 | ADP | SEFB | max | 0 | 2 | 2012 |
| 41 | ADP | SEFB | median | 0 | 2 | 1 |
| 41 | ADP | SEFB | recent | 0 | 2 | 2012 |
| 41 | ADP | WATT | max | 0 | 2301 | 2012 |
| 41 | ADP | WATT | median | 0 | 2301 | 1 |
| 41 | ADP | WATT | recent | 0 | 2301 | 2012 |
| 41 | ADP | WAYA | max | 0 | 5997 | 2011 |
| 41 | ADP | WAYA | median | 0 | 5997 | 1 |
| 41 | ADP | WAYA | recent | 0 | 5997 | 2011 |

# Antarctica marine IBA: 42

| Site code | 42 |
| --- | --- |
| Species | EMP |
| IBA criteria | A4: Congregations |
| Decimal Latitude | -66.636 |
| Decimal Longitude | 146.652 |
| Area (ha) | 399152.2 |
| Area (km2) | 3991.522 |
| MPA Overlap | EARSMPA |
| MPA Type | Proposed |
| MPA Zones | Drygalski MPA |


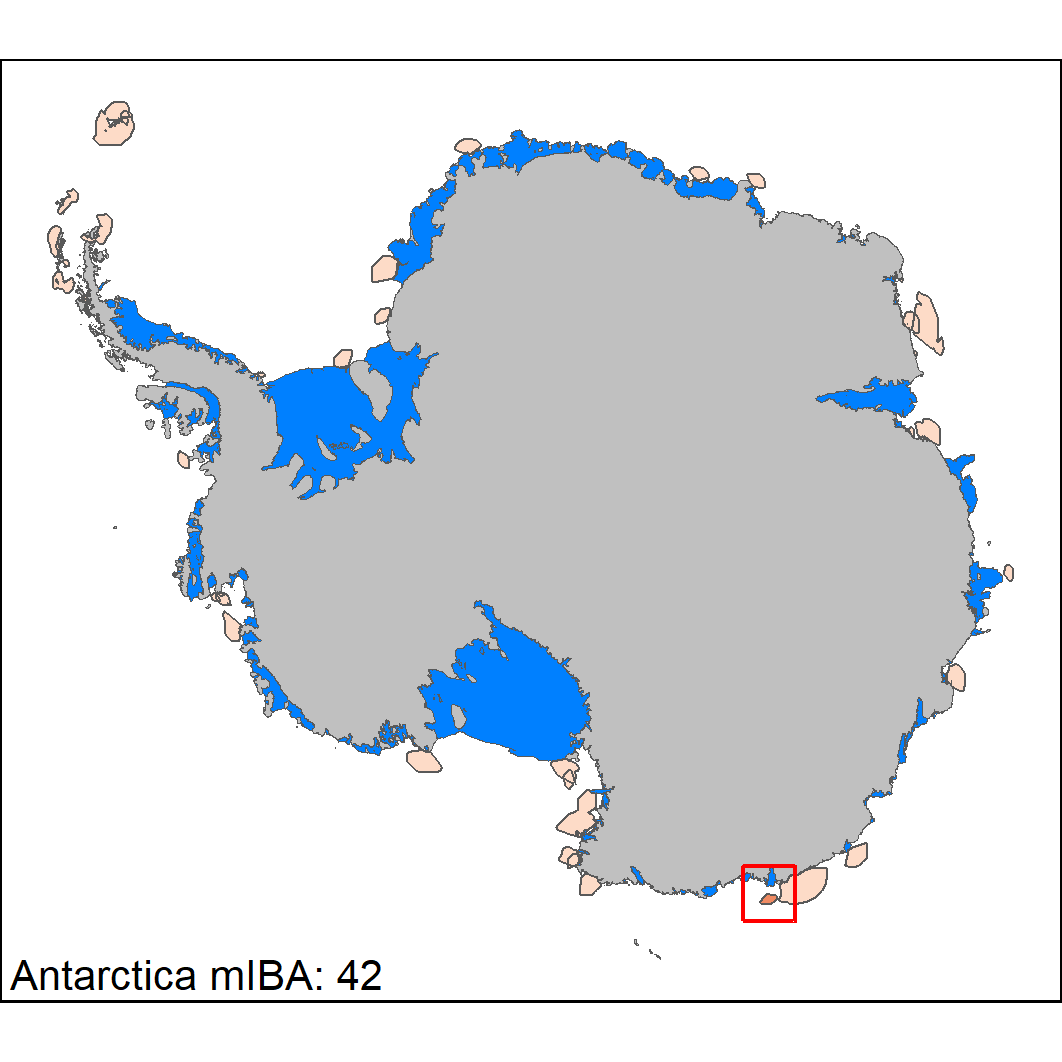


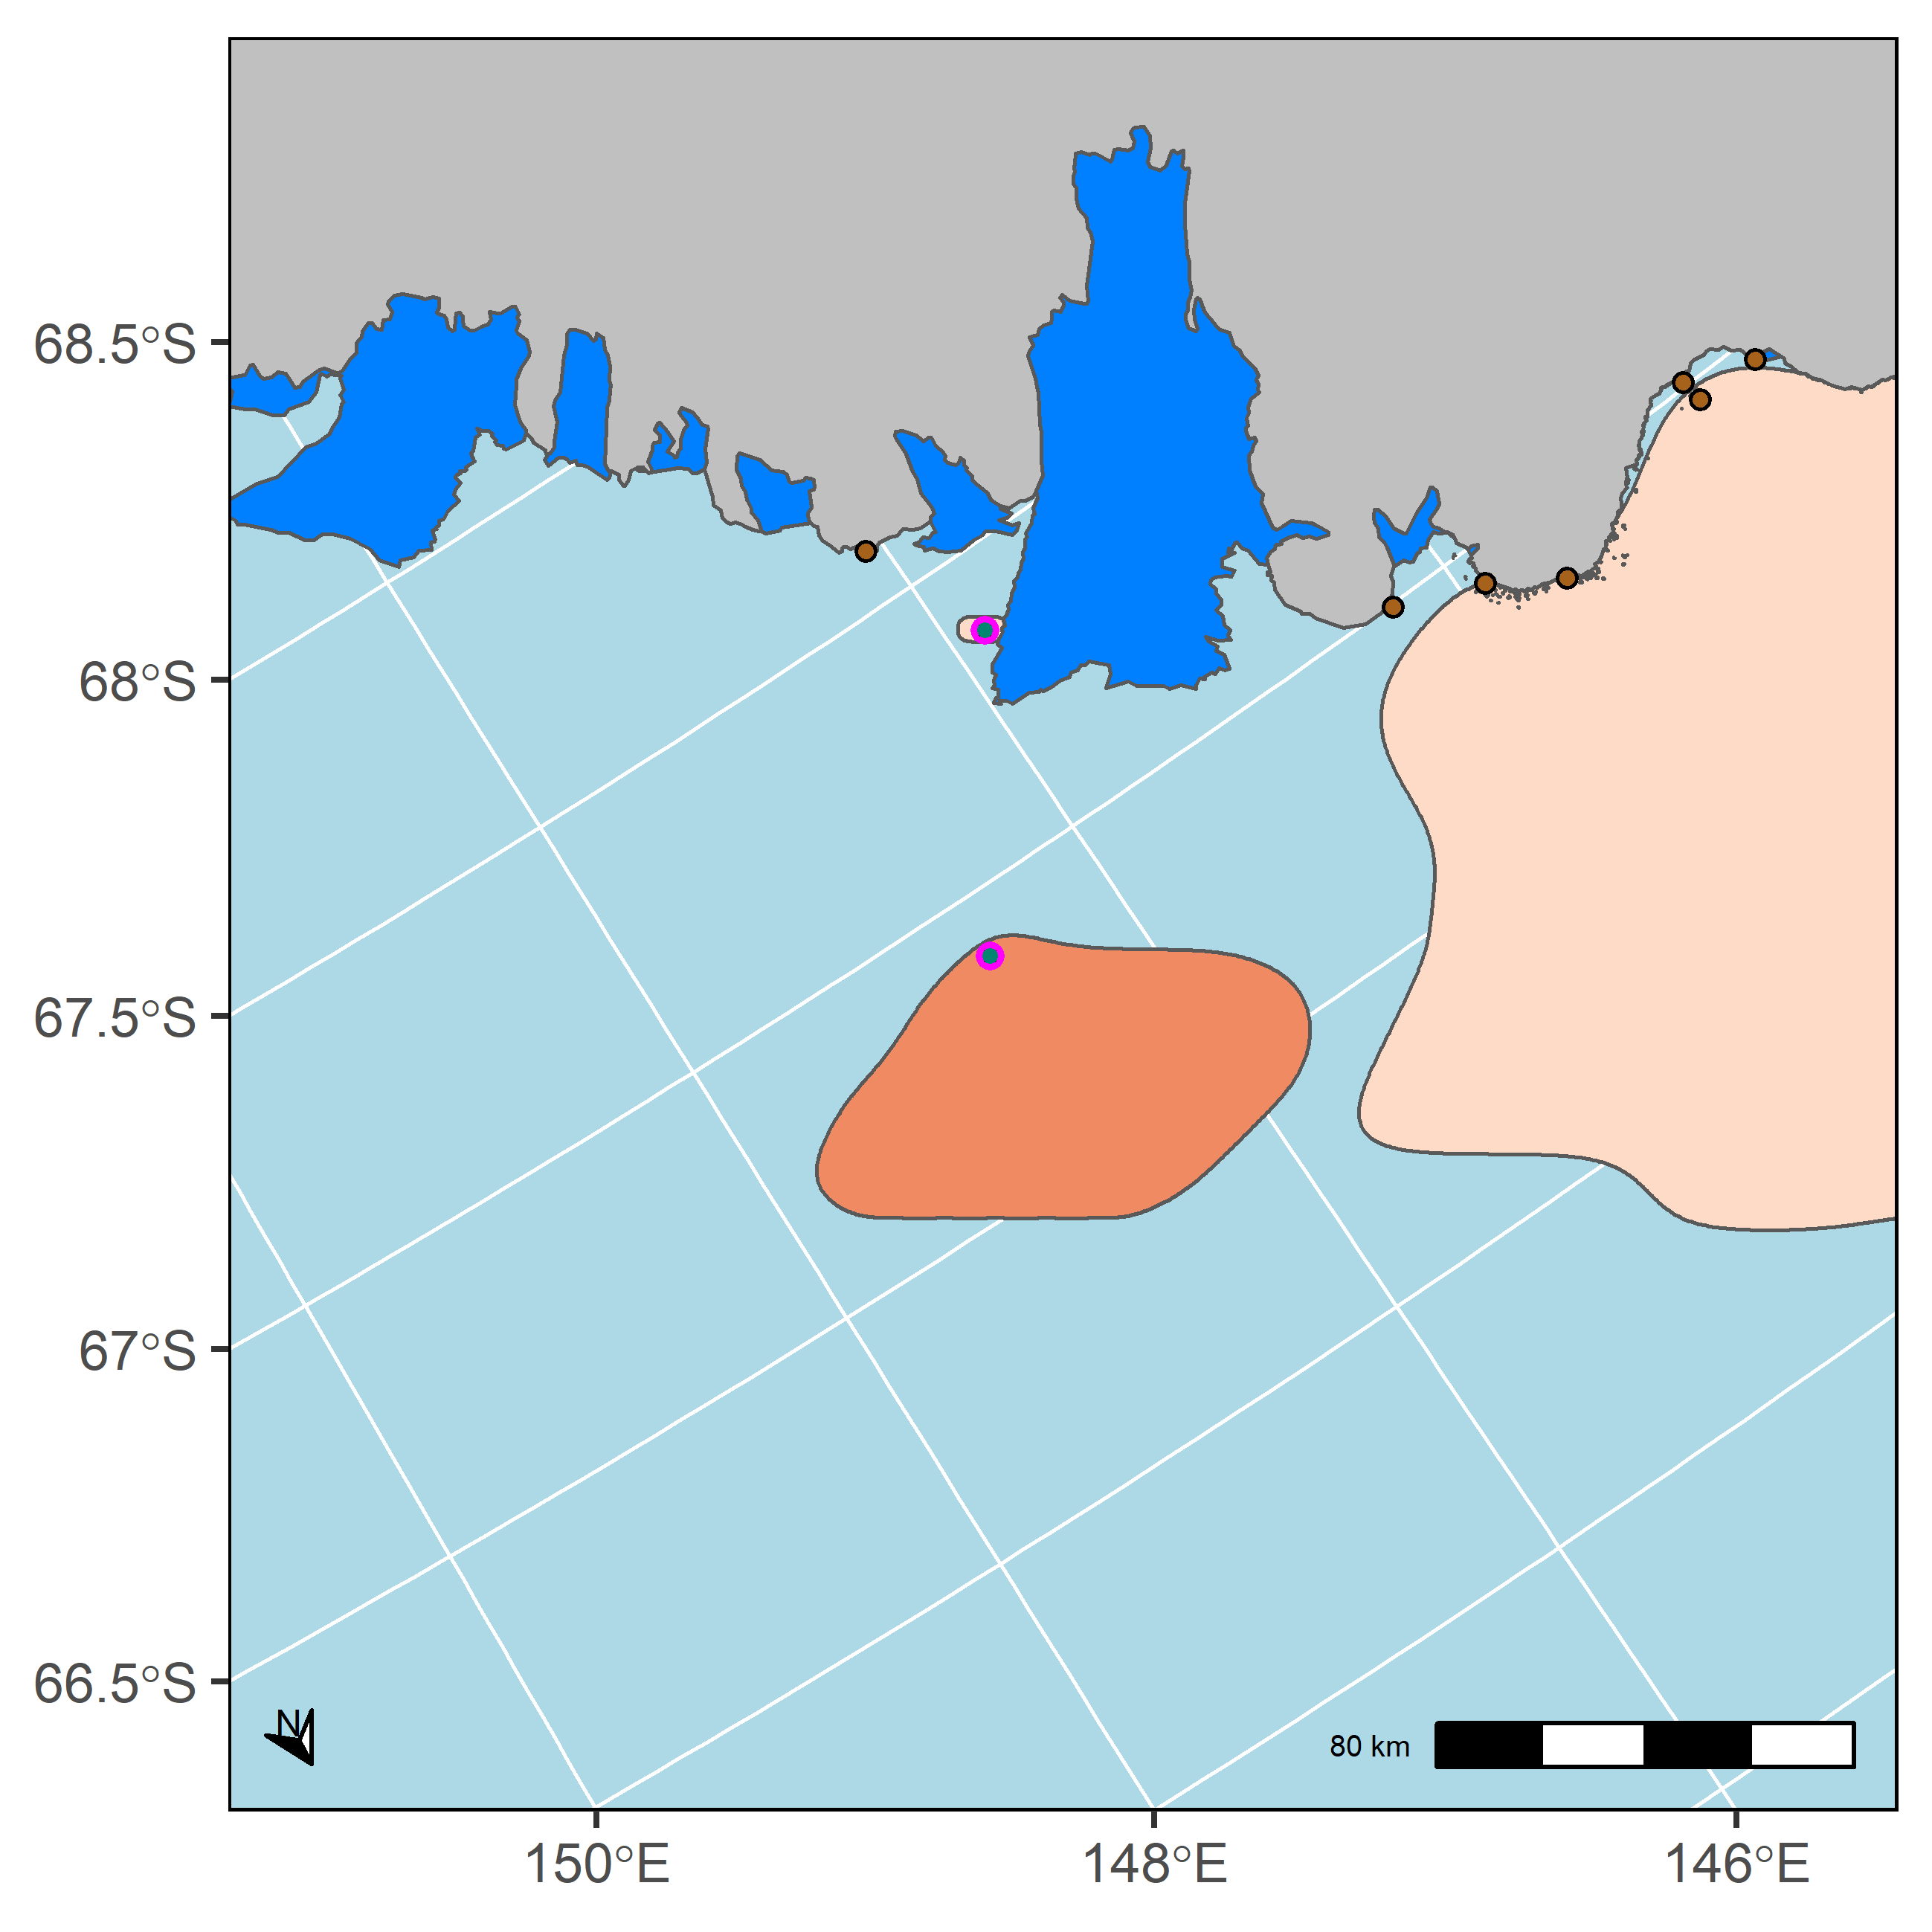


Figure A42.1: Focal Antarctica marine IBA 42 (orange polygon) for penguins, and other marine IBAs (light orange) for penguins identified during the project. Colonies circled in purple are those whose populations contributed to the marine IBA triggering IBA criteria A4 (>1% of the global population). See Table A42.2.

Table A42.1: Population estimates and count types (those that triggered IBA Criteria A4, >1% of global population) for key penguin species in Antarctic marine IBA 42. Key sources of colony input data associated with this marine IBA are detailed in Table A42.2. Population estimates refer to the lower and upper estimated number of adult breeding pairs likely to be using the marine IBA; derived from summing over all cells from individual colony density distribution surfaces which contributed to the identification of the marine IBA.

| Site code | Species | Count type | Lower | Upper |
| --- | --- | --- | --- | --- |
| 42 | EMP | min | 2575 | 5946 |
| 42 | EMP | max | 2575 | 5946 |
| 42 | EMP | median | 2575 | 5946 |
| 42 | EMP | recent | 2575 | 5946 |

Table A42.2: Population estimates (adult breeding pairs) and count types from individual colony(ies) density distribution surfaces which contributed to the identification of marine IBA: 42. I.e. The lower and upper estimated number of adult breeding pairs from a given colony that may utilise the marine IBA. Note, the lower population estimate represents the lowest estimated number of breeding pairs from a given colony contributing to the delineation of the marine IBA site. The lower population estimate may therefore be zero when only part of the individual colony(ies) density distribution surface contributed to the marine IBA. *The Count Year for the median population estimate indicates the number of yearly population assessments for the given colony. Colony names are given in the ‘Colony Codes’ table at the end of this document.

| Site code | Species | Colony | Count type | Lower | Upper | Count year* |
| --- | --- | --- | --- | --- | --- | --- |
| 42 | EMP | MBOF | min | 471 | 1269 | 2019 |
| 42 | EMP | MBOF | max | 471 | 1269 | 2019 |
| 42 | EMP | MBOF | median | 471 | 1269 | 1 |
| 42 | EMP | MBOF | recent | 471 | 1269 | 2019 |
| 42 | EMP | MERT | min | 1855 | 4781 | 2009 |
| 42 | EMP | MERT | max | 1855 | 4781 | 2009 |
| 42 | EMP | MERT | median | 1855 | 4781 | 1 |
| 42 | EMP | MERT | recent | 1855 | 4781 | 2009 |

# Antarctica marine IBA: 43

| Site code | 43 |
| --- | --- |
| Species | EMP |
| IBA criteria | A4: Congregations |
| Decimal Latitude | -67.371 |
| Decimal Longitude | 145.846 |
| Area (ha) | 3997.123 |
| Area (km2) | 39.97123 |
| MPA Overlap | EARSMPA |
| MPA Type | Proposed |
| MPA Zones | Drygalski MPA |


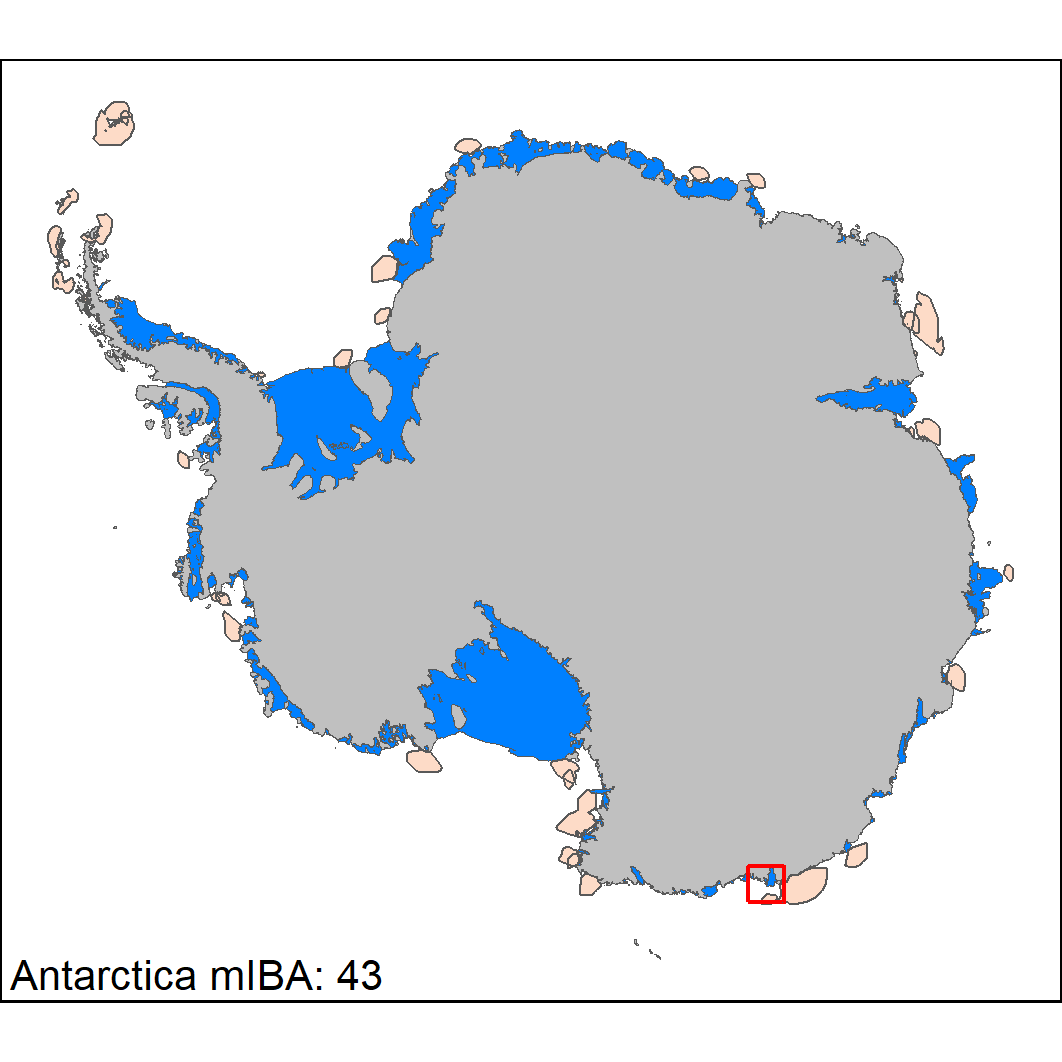


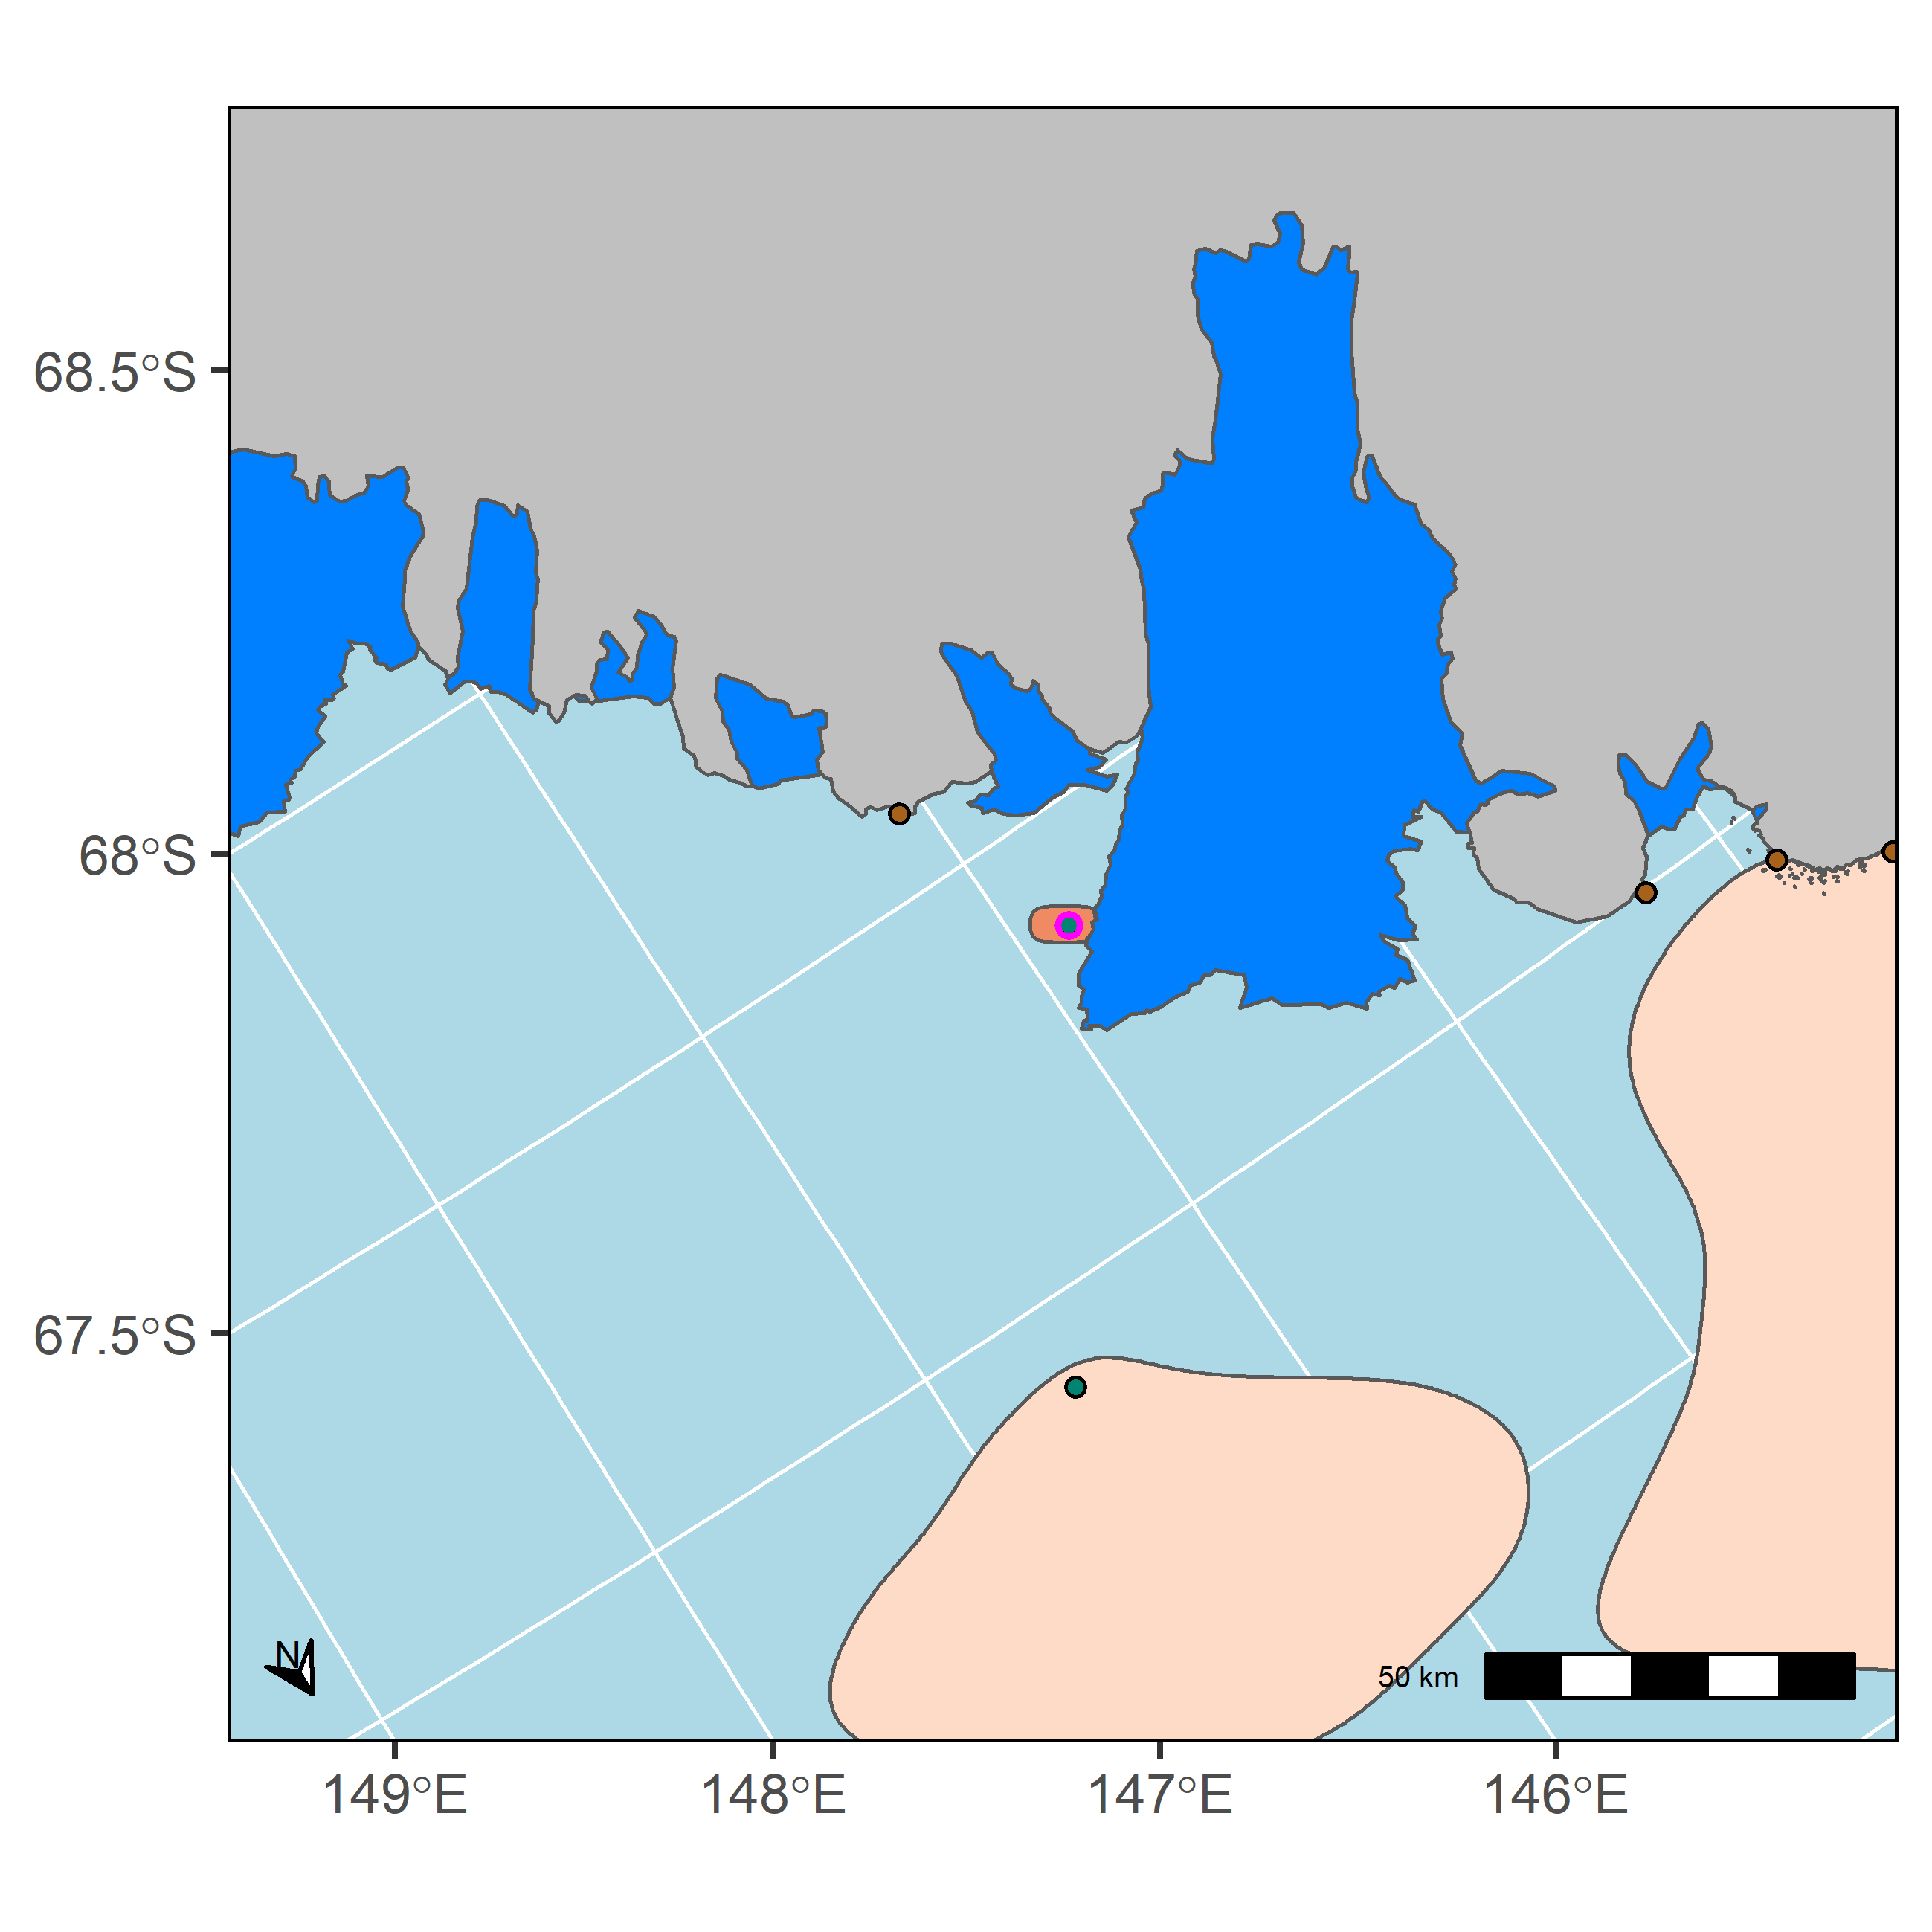


Figure A43.1: Focal Antarctica marine IBA 43 (orange polygon) for penguins, and other marine IBAs (light orange) for penguins identified during the project. Colonies circled in purple are those whose populations contributed to the marine IBA triggering IBA criteria A4 (>1% of the global population). See Table A43.2.

Table A43.1: Population estimates and count types (those that triggered IBA Criteria A4, >1% of global population) for key penguin species in Antarctic marine IBA 43. Key sources of colony input data associated with this marine IBA are detailed in Table A43.2. Population estimates refer to the lower and upper estimated number of adult breeding pairs likely to be using the marine IBA; derived from summing over all cells from individual colony density distribution surfaces which contributed to the identification of the marine IBA.

| Site code | Species | Count type | Lower | Upper |
| --- | --- | --- | --- | --- |
| 43 | EMP | min | 2726 | 3000 |
| 43 | EMP | max | 2726 | 3000 |
| 43 | EMP | median | 2726 | 3000 |
| 43 | EMP | recent | 2726 | 3000 |

Table A43.2: Population estimates (adult breeding pairs) and count types from individual colony(ies) density distribution surfaces which contributed to the identification of marine IBA: 43. I.e. The lower and upper estimated number of adult breeding pairs from a given colony that may utilise the marine IBA. Note, the lower population estimate represents the lowest estimated number of breeding pairs from a given colony contributing to the delineation of the marine IBA site. The lower population estimate may therefore be zero when only part of the individual colony(ies) density distribution surface contributed to the marine IBA. *The Count Year for the median population estimate indicates the number of yearly population assessments for the given colony. Colony names are given in the ‘Colony Codes’ table at the end of this document.

| Site code | Species | Colony | Count type | Lower | Upper | Count year* |
| --- | --- | --- | --- | --- | --- | --- |
| 43 | EMP | MBOF | min | 2726 | 3000 | 2019 |
| 43 | EMP | MBOF | max | 2726 | 3000 | 2019 |
| 43 | EMP | MBOF | median | 2726 | 3000 | 1 |
| 43 | EMP | MBOF | recent | 2726 | 3000 | 2019 |

# Antarctica marine IBA: 44

| Site code | 44 |
| --- | --- |
| Species | ADP |
| IBA criteria | A4: Congregations |
| Decimal Latitude | -70.81 |
| Decimal Longitude | 169.386 |
| Area (ha) | 1073500 |
| Area (km2) | 10735 |
| MPA Overlap | Ross Sea MPA |
| MPA Type | Confirmed |
| MPA Zones | RS-GPZi |


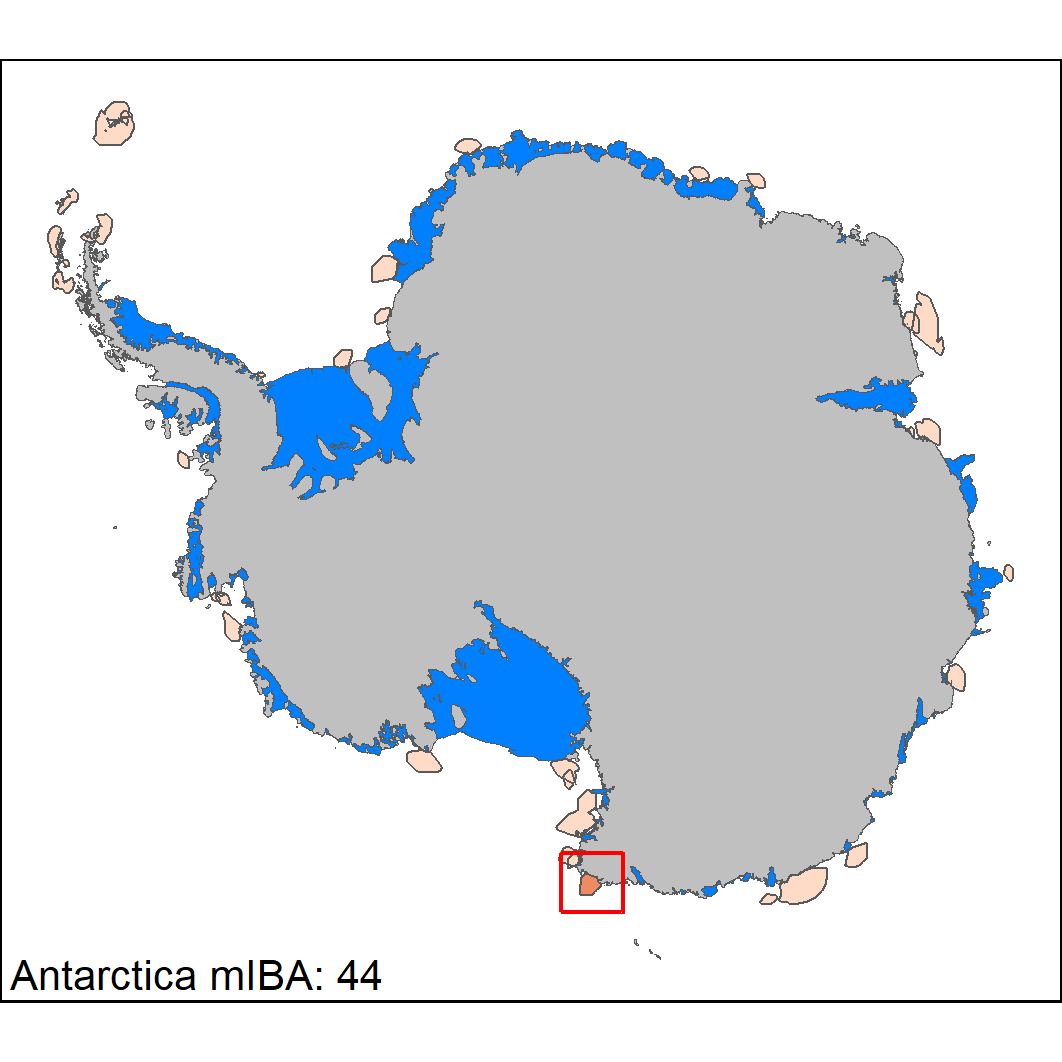


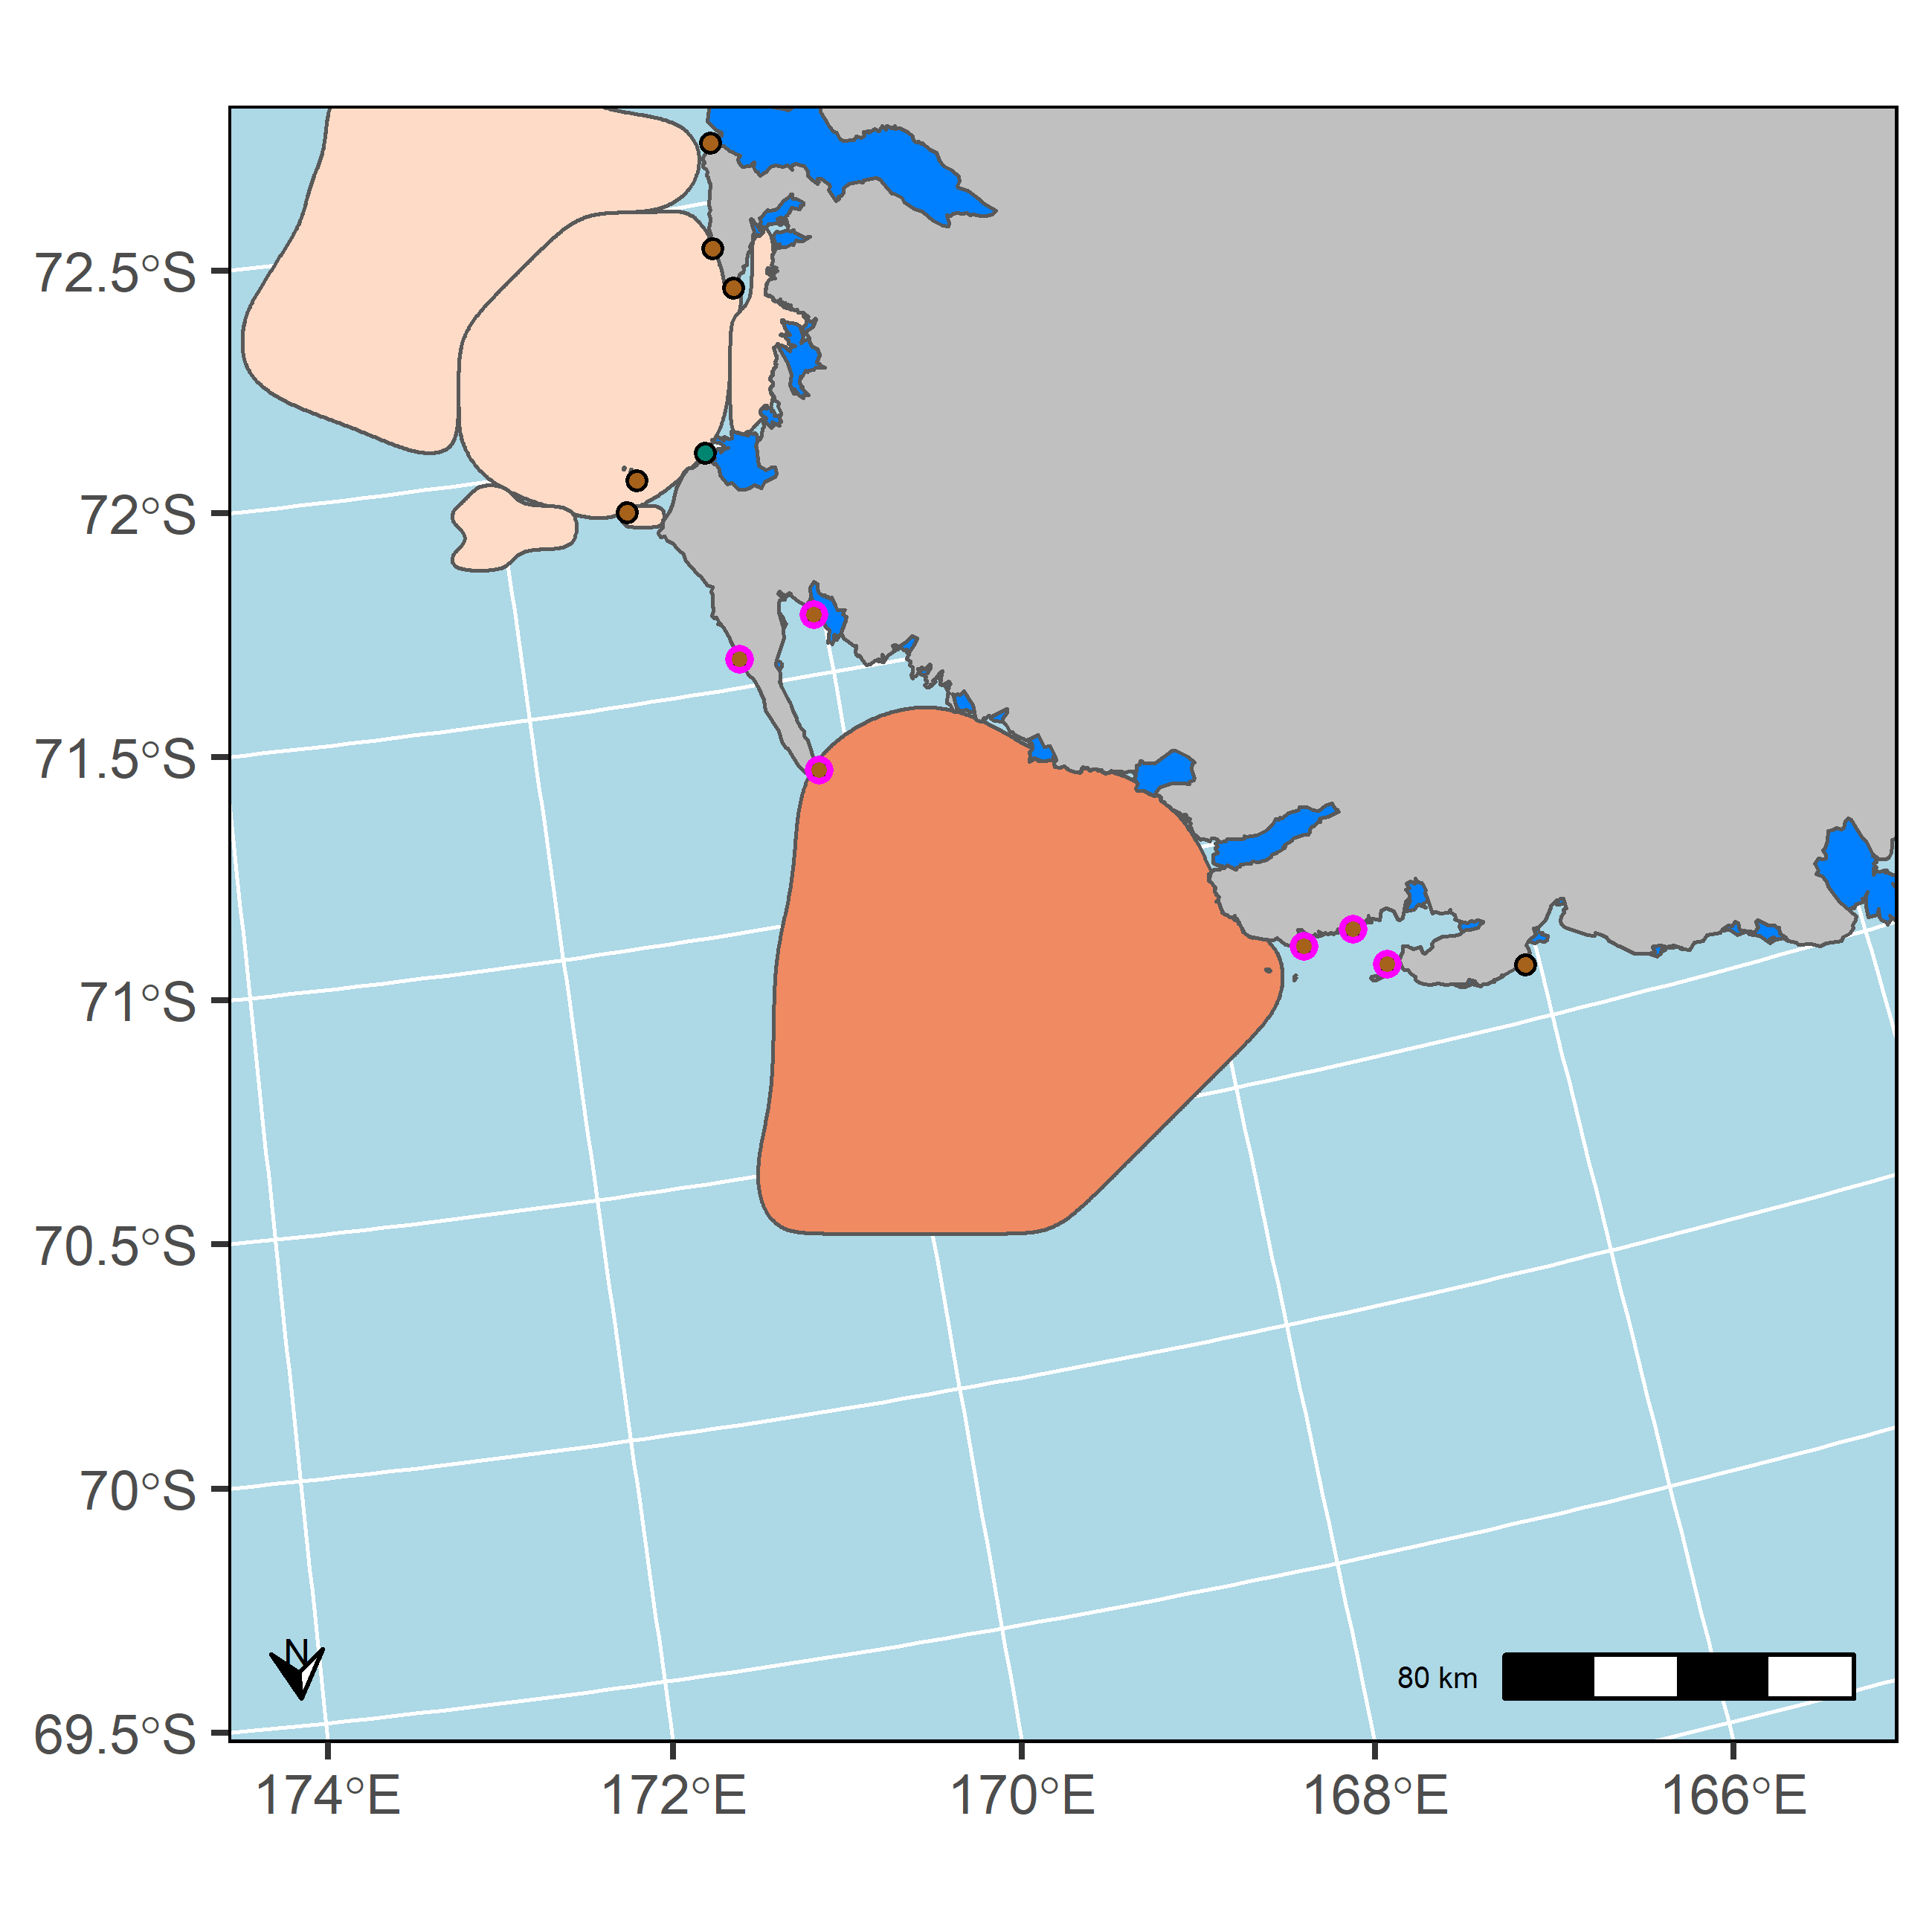


Figure A44.1: Focal Antarctica marine IBA 44 (orange polygon) for penguins, and other marine IBAs (light orange) for penguins identified during the project. Colonies circled in purple are those whose populations contributed to the marine IBA triggering IBA criteria A4 (>1% of the global population). See Table A44.2.

Table A44.1: Population estimates and count types (those that triggered IBA Criteria A4, >1% of global population) for key penguin species in Antarctic marine IBA 44. Key sources of colony input data associated with this marine IBA are detailed in Table A44.2. Population estimates refer to the lower and upper estimated number of adult breeding pairs likely to be using the marine IBA; derived from summing over all cells from individual colony density distribution surfaces which contributed to the identification of the marine IBA.

| Site code | Species | Count type | Lower | Upper |
| --- | --- | --- | --- | --- |
| 44 | ADP | max | 58366 | 437471 |
| 44 | ADP | median | 39488 | 292365 |
| 44 | ADP | recent | 58366 | 433201 |

Table A44.2: Population estimates (adult breeding pairs) and count types from individual colony(ies) density distribution surfaces which contributed to the identification of marine IBA: 44. I.e. The lower and upper estimated number of adult breeding pairs from a given colony that may utilise the marine IBA. Note, the lower population estimate represents the lowest estimated number of breeding pairs from a given colony contributing to the delineation of the marine IBA site. The lower population estimate may therefore be zero when only part of the individual colony(ies) density distribution surface contributed to the marine IBA. *The Count Year for the median population estimate indicates the number of yearly population assessments for the given colony. Colony names are given in the ‘Colony Codes’ table at the end of this document.

| Site code | Species | Colony | Count type | Lower | Upper | Count year* |
| --- | --- | --- | --- | --- | --- | --- |
| 44 | ADP | ADAR | max | 58175 | 428516 | 2013 |
| 44 | ADP | ADAR | median | 39353 | 289875 | 8 |
| 44 | ADP | ADAR | recent | 58175 | 428516 | 2013 |
| 44 | ADP | DOWN | max | 0 | 20479 | 2013 |
| 44 | ADP | DOWN | median | 0 | 12395 | 10 |
| 44 | ADP | DOWN | recent | 0 | 20479 | 2013 |
| 44 | ADP | DUKE | max | 0 | 10141 | 2011 |
| 44 | ADP | DUKE | median | 0 | 2820 | 7 |
| 44 | ADP | DUKE | recent | 0 | 5305 | 2013 |
| 44 | ADP | FBER | max | 51 | 197 | 2011 |
| 44 | ADP | FBER | median | 51 | 197 | 1 |
| 44 | ADP | FBER | recent | 51 | 197 | 2011 |
| 44 | ADP | SENT | max | 22 | 273 | 2011 |
| 44 | ADP | SENT | median | 15 | 184 | 2 |
| 44 | ADP | SENT | recent | 22 | 273 | 2011 |
| 44 | ADP | UNGE | max | 0 | 182 | 2011 |
| 44 | ADP | UNGE | median | 0 | 82 | 3 |
| 44 | ADP | UNGE | recent | 0 | 182 | 2011 |

# Antarctica marine IBA: 45

| Site code | 45 |
| --- | --- |
| Species | ADP |
| IBA criteria | A4: Congregations |
| Decimal Latitude | -71.881 |
| Decimal Longitude | 171.06 |
| Area (ha) | 4071.784 |
| Area (km2) | 40.71784 |
| MPA Overlap | Ross Sea MPA |
| MPA Type | Confirmed |
| MPA Zones | RS-GPZi |


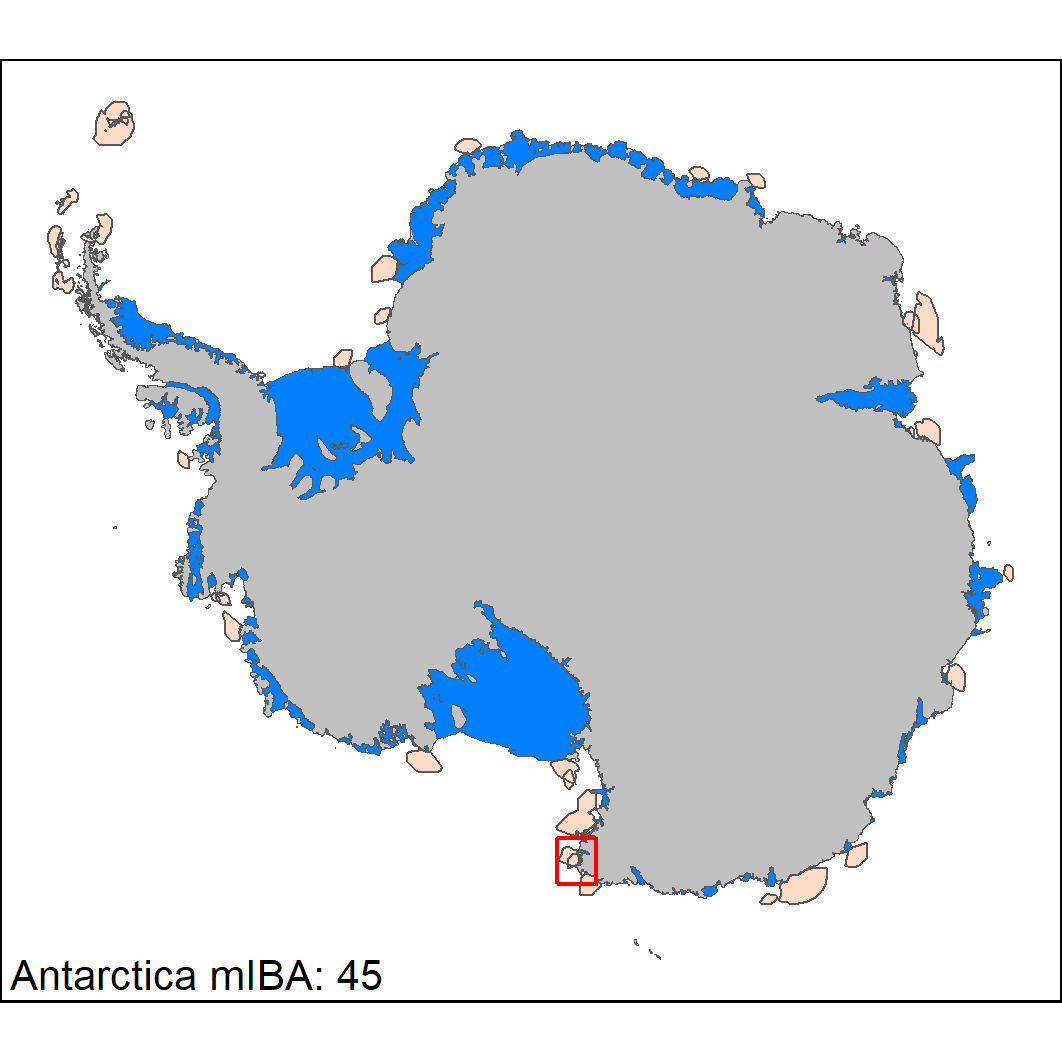


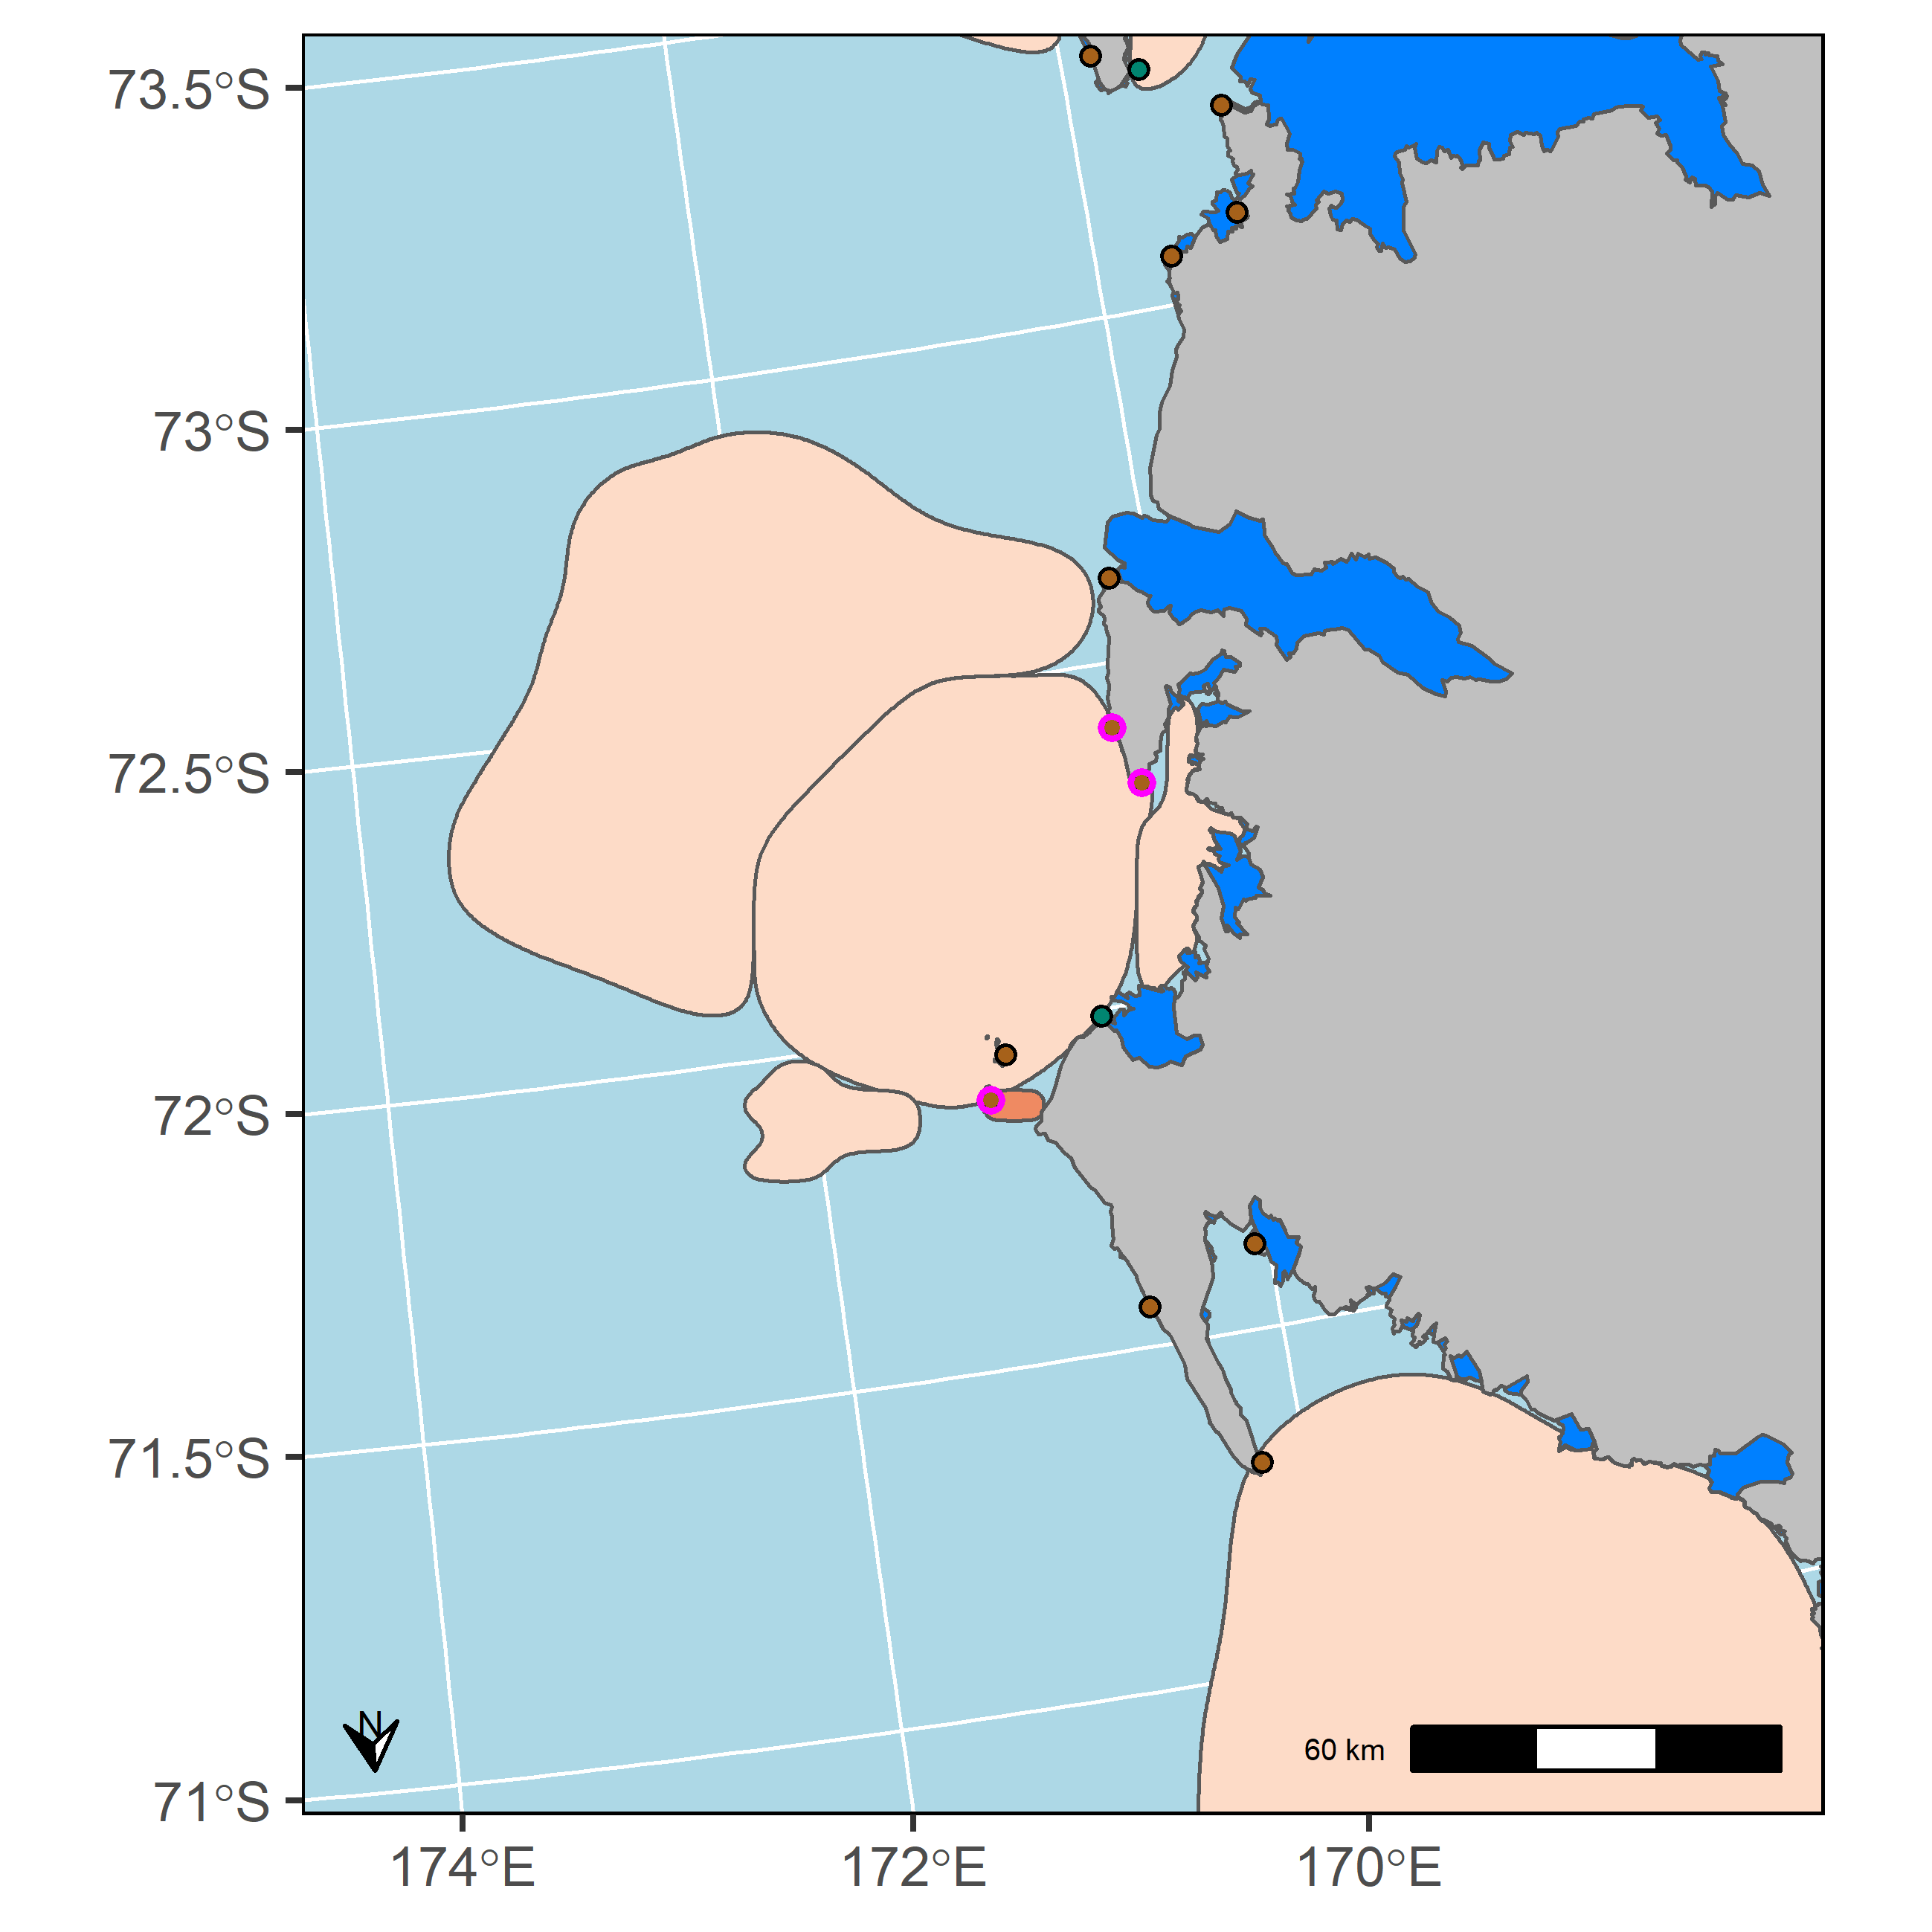


Figure A45.1: Focal Antarctica marine IBA 45 (orange polygon) for penguins, and other marine IBAs (light orange) for penguins identified during the project. Colonies circled in purple are those whose populations contributed to the marine IBA triggering IBA criteria A4 (>1% of the global population). See Table A45.2.

Table A45.1: Population estimates and count types (those that triggered IBA Criteria A4, >1% of global population) for key penguin species in Antarctic marine IBA 45. Key sources of colony input data associated with this marine IBA are detailed in Table A45.2. Population estimates refer to the lower and upper estimated number of adult breeding pairs likely to be using the marine IBA; derived from summing over all cells from individual colony density distribution surfaces which contributed to the identification of the marine IBA.

| Site code | Species | Count type | Lower | Upper |
| --- | --- | --- | --- | --- |
| 45 | ADP | min | 80365 | 97457 |
| 45 | ADP | max | 188489 | 227204 |
| 45 | ADP | median | 147016 | 177949 |
| 45 | ADP | recent | 177330 | 215567 |

Table A45.2: Population estimates (adult breeding pairs) and count types from individual colony(ies) density distribution surfaces which contributed to the identification of marine IBA: 45. I.e. The lower and upper estimated number of adult breeding pairs from a given colony that may utilise the marine IBA. Note, the lower population estimate represents the lowest estimated number of breeding pairs from a given colony contributing to the delineation of the marine IBA site. The lower population estimate may therefore be zero when only part of the individual colony(ies) density distribution surface contributed to the marine IBA. *The Count Year for the median population estimate indicates the number of yearly population assessments for the given colony. Colony names are given in the ‘Colony Codes’ table at the end of this document.

| Site code | Species | Colony | Count type | Lower | Upper | Count year* |
| --- | --- | --- | --- | --- | --- | --- |
| 45 | ADP | CHAL | min | 9977 | 10339 | 2006 |
| 45 | ADP | CHAL | max | 26629 | 27596 | 1987 |
| 45 | ADP | CHAL | median | 19075 | 19767 | 17 |
| 45 | ADP | CHAL | recent | 18940 | 19627 | 2013 |
| 45 | ADP | COTT | min | 7710 | 8150 | 2006 |
| 45 | ADP | COTT | max | 21295 | 22512 | 1987 |
| 45 | ADP | COTT | median | 14850 | 15699 | 10 |
| 45 | ADP | COTT | recent | 17824 | 18843 | 2013 |
| 45 | ADP | POSS | min | 62678 | 78967 | 2006 |
| 45 | ADP | POSS | max | 140566 | 177097 | 2013 |
| 45 | ADP | POSS | median | 113092 | 142483 | 5 |
| 45 | ADP | POSS | recent | 140566 | 177097 | 2013 |

# Antarctica marine IBA: 46

| Site code | 46 |
| --- | --- |
| Species | EMP |
| IBA criteria | A4: Congregations |
| Decimal Latitude | -71.898 |
| Decimal Longitude | 171.972 |
| Area (ha) | 37504.17 |
| Area (km2) | 375.0417 |
| MPA Overlap | Ross Sea MPA |
| MPA Type | Confirmed |
| MPA Zones | RS-GPZi |


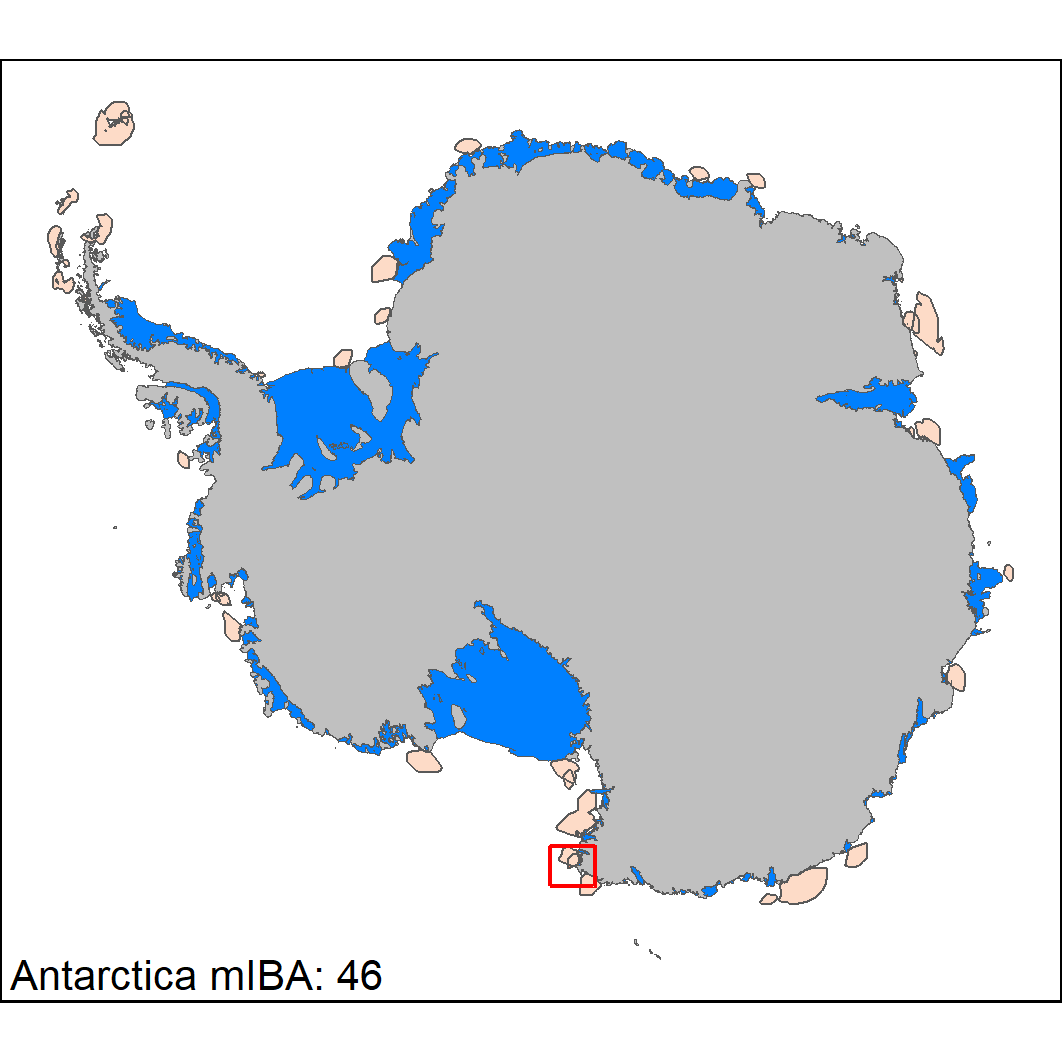


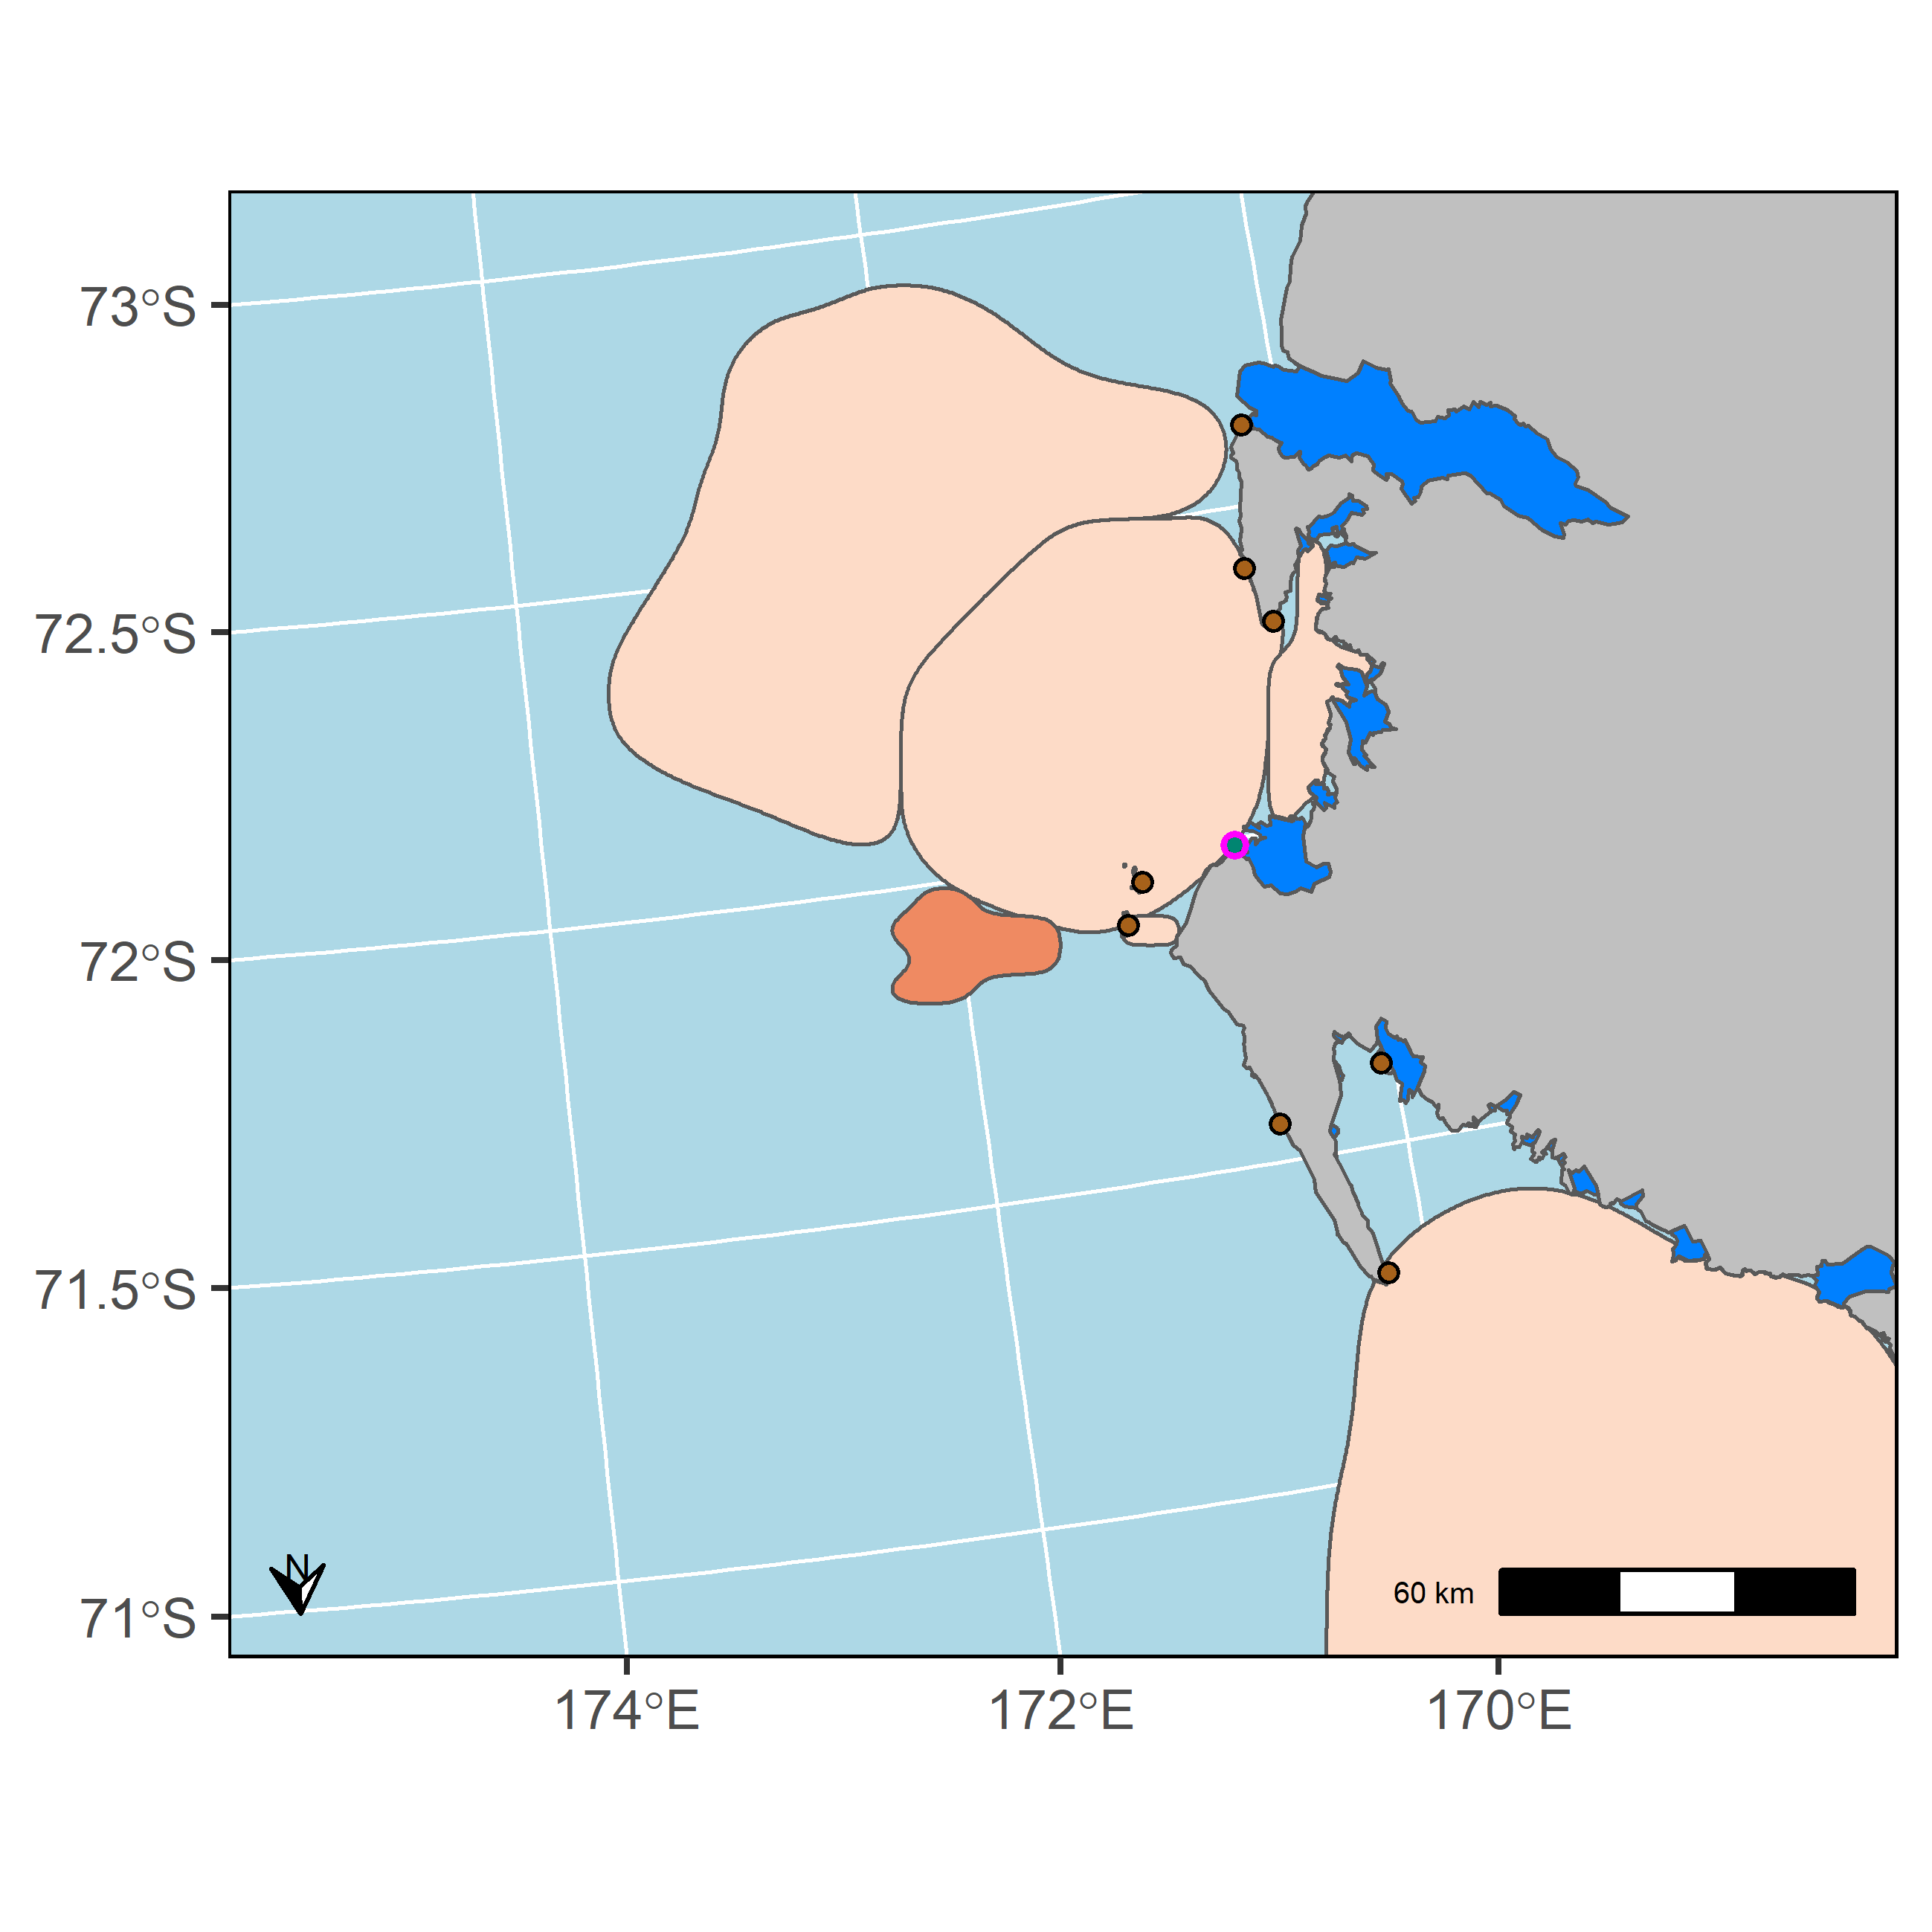


Figure A46.1: Focal Antarctica marine IBA 46 (orange polygon) for penguins, and other marine IBAs (light orange) for penguins identified during the project. Colonies circled in purple are those whose populations contributed to the marine IBA triggering IBA criteria A4 (>1% of the global population). See Table A46.2.

Table A46.1: Population estimates and count types (those that triggered IBA Criteria A4, >1% of global population) for key penguin species in Antarctic marine IBA 46. Key sources of colony input data associated with this marine IBA are detailed in Table A46.2. Population estimates refer to the lower and upper estimated number of adult breeding pairs likely to be using the marine IBA; derived from summing over all cells from individual colony density distribution surfaces which contributed to the identification of the marine IBA.

| Site code | Species | Count type | Lower | Upper |
| --- | --- | --- | --- | --- |
| 46 | EMP | max | 4085 | 5509 |
| 46 | EMP | median | 2623 | 3537 |
| 46 | EMP | recent | 2695 | 3634 |

Table A46.2: Population estimates (adult breeding pairs) and count types from individual colony(ies) density distribution surfaces which contributed to the identification of marine IBA: 46. I.e. The lower and upper estimated number of adult breeding pairs from a given colony that may utilise the marine IBA. Note, the lower population estimate represents the lowest estimated number of breeding pairs from a given colony contributing to the delineation of the marine IBA site. The lower population estimate may therefore be zero when only part of the individual colony(ies) density distribution surface contributed to the marine IBA. *The Count Year for the median population estimate indicates the number of yearly population assessments for the given colony. Colony names are given in the ‘Colony Codes’ table at the end of this document.

| Site code | Species | Colony | Count type | Lower | Upper | Count year* |
| --- | --- | --- | --- | --- | --- | --- |
| 46 | EMP | ROGE | max | 4085 | 5509 | 2009 |
| 46 | EMP | ROGE | median | 2623 | 3537 | 6 |
| 46 | EMP | ROGE | recent | 2695 | 3634 | 2012 |

# Antarctica marine IBA: 47

| Site code | 47 |
| --- | --- |
| Species | ADP,EMP |
| IBA criteria | A4: Congregations |
| Decimal Latitude | -72.206 |
| Decimal Longitude | 171.185 |
| Area (ha) | 350757.6 |
| Area (km2) | 3507.576 |
| MPA Overlap | Ross Sea MPA |
| MPA Type | Confirmed |
| MPA Zones | RS-GPZi |


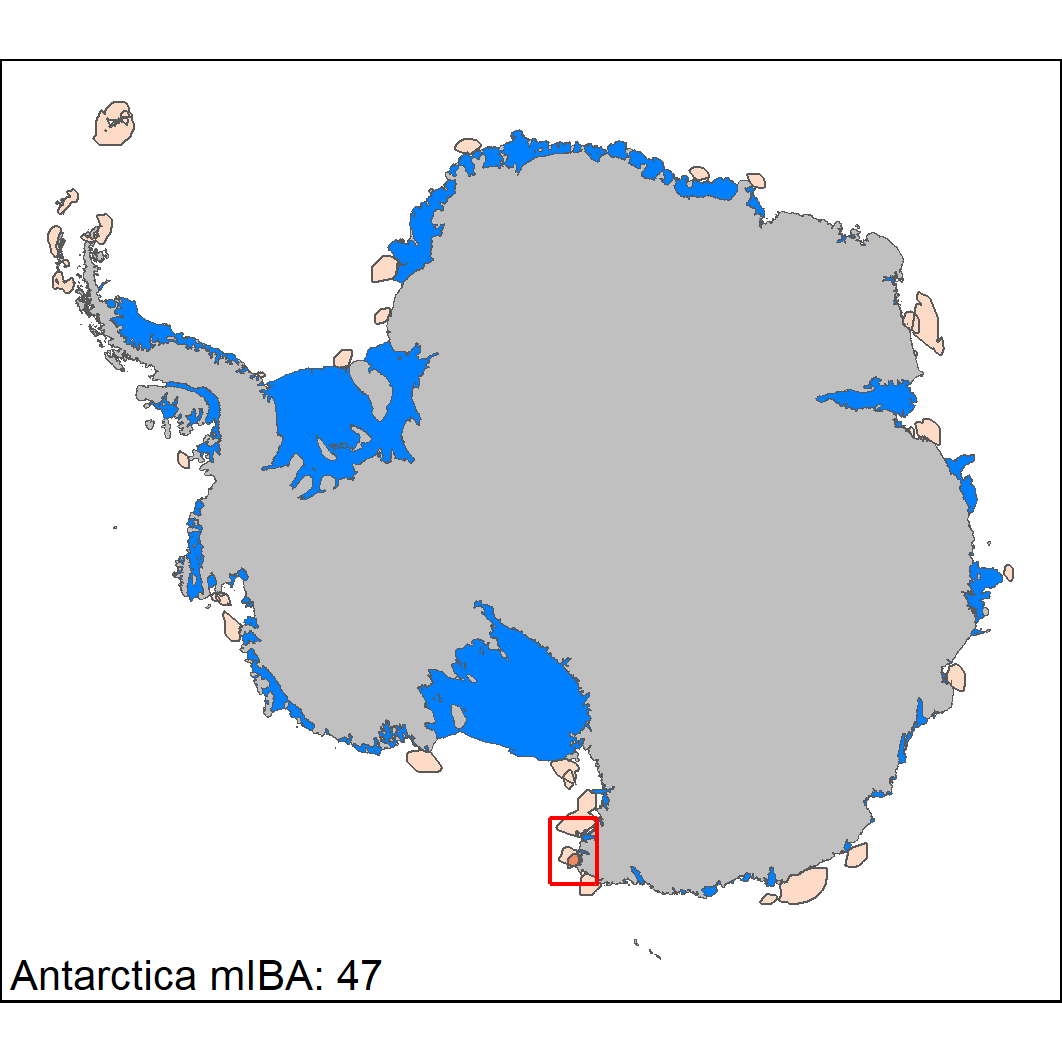


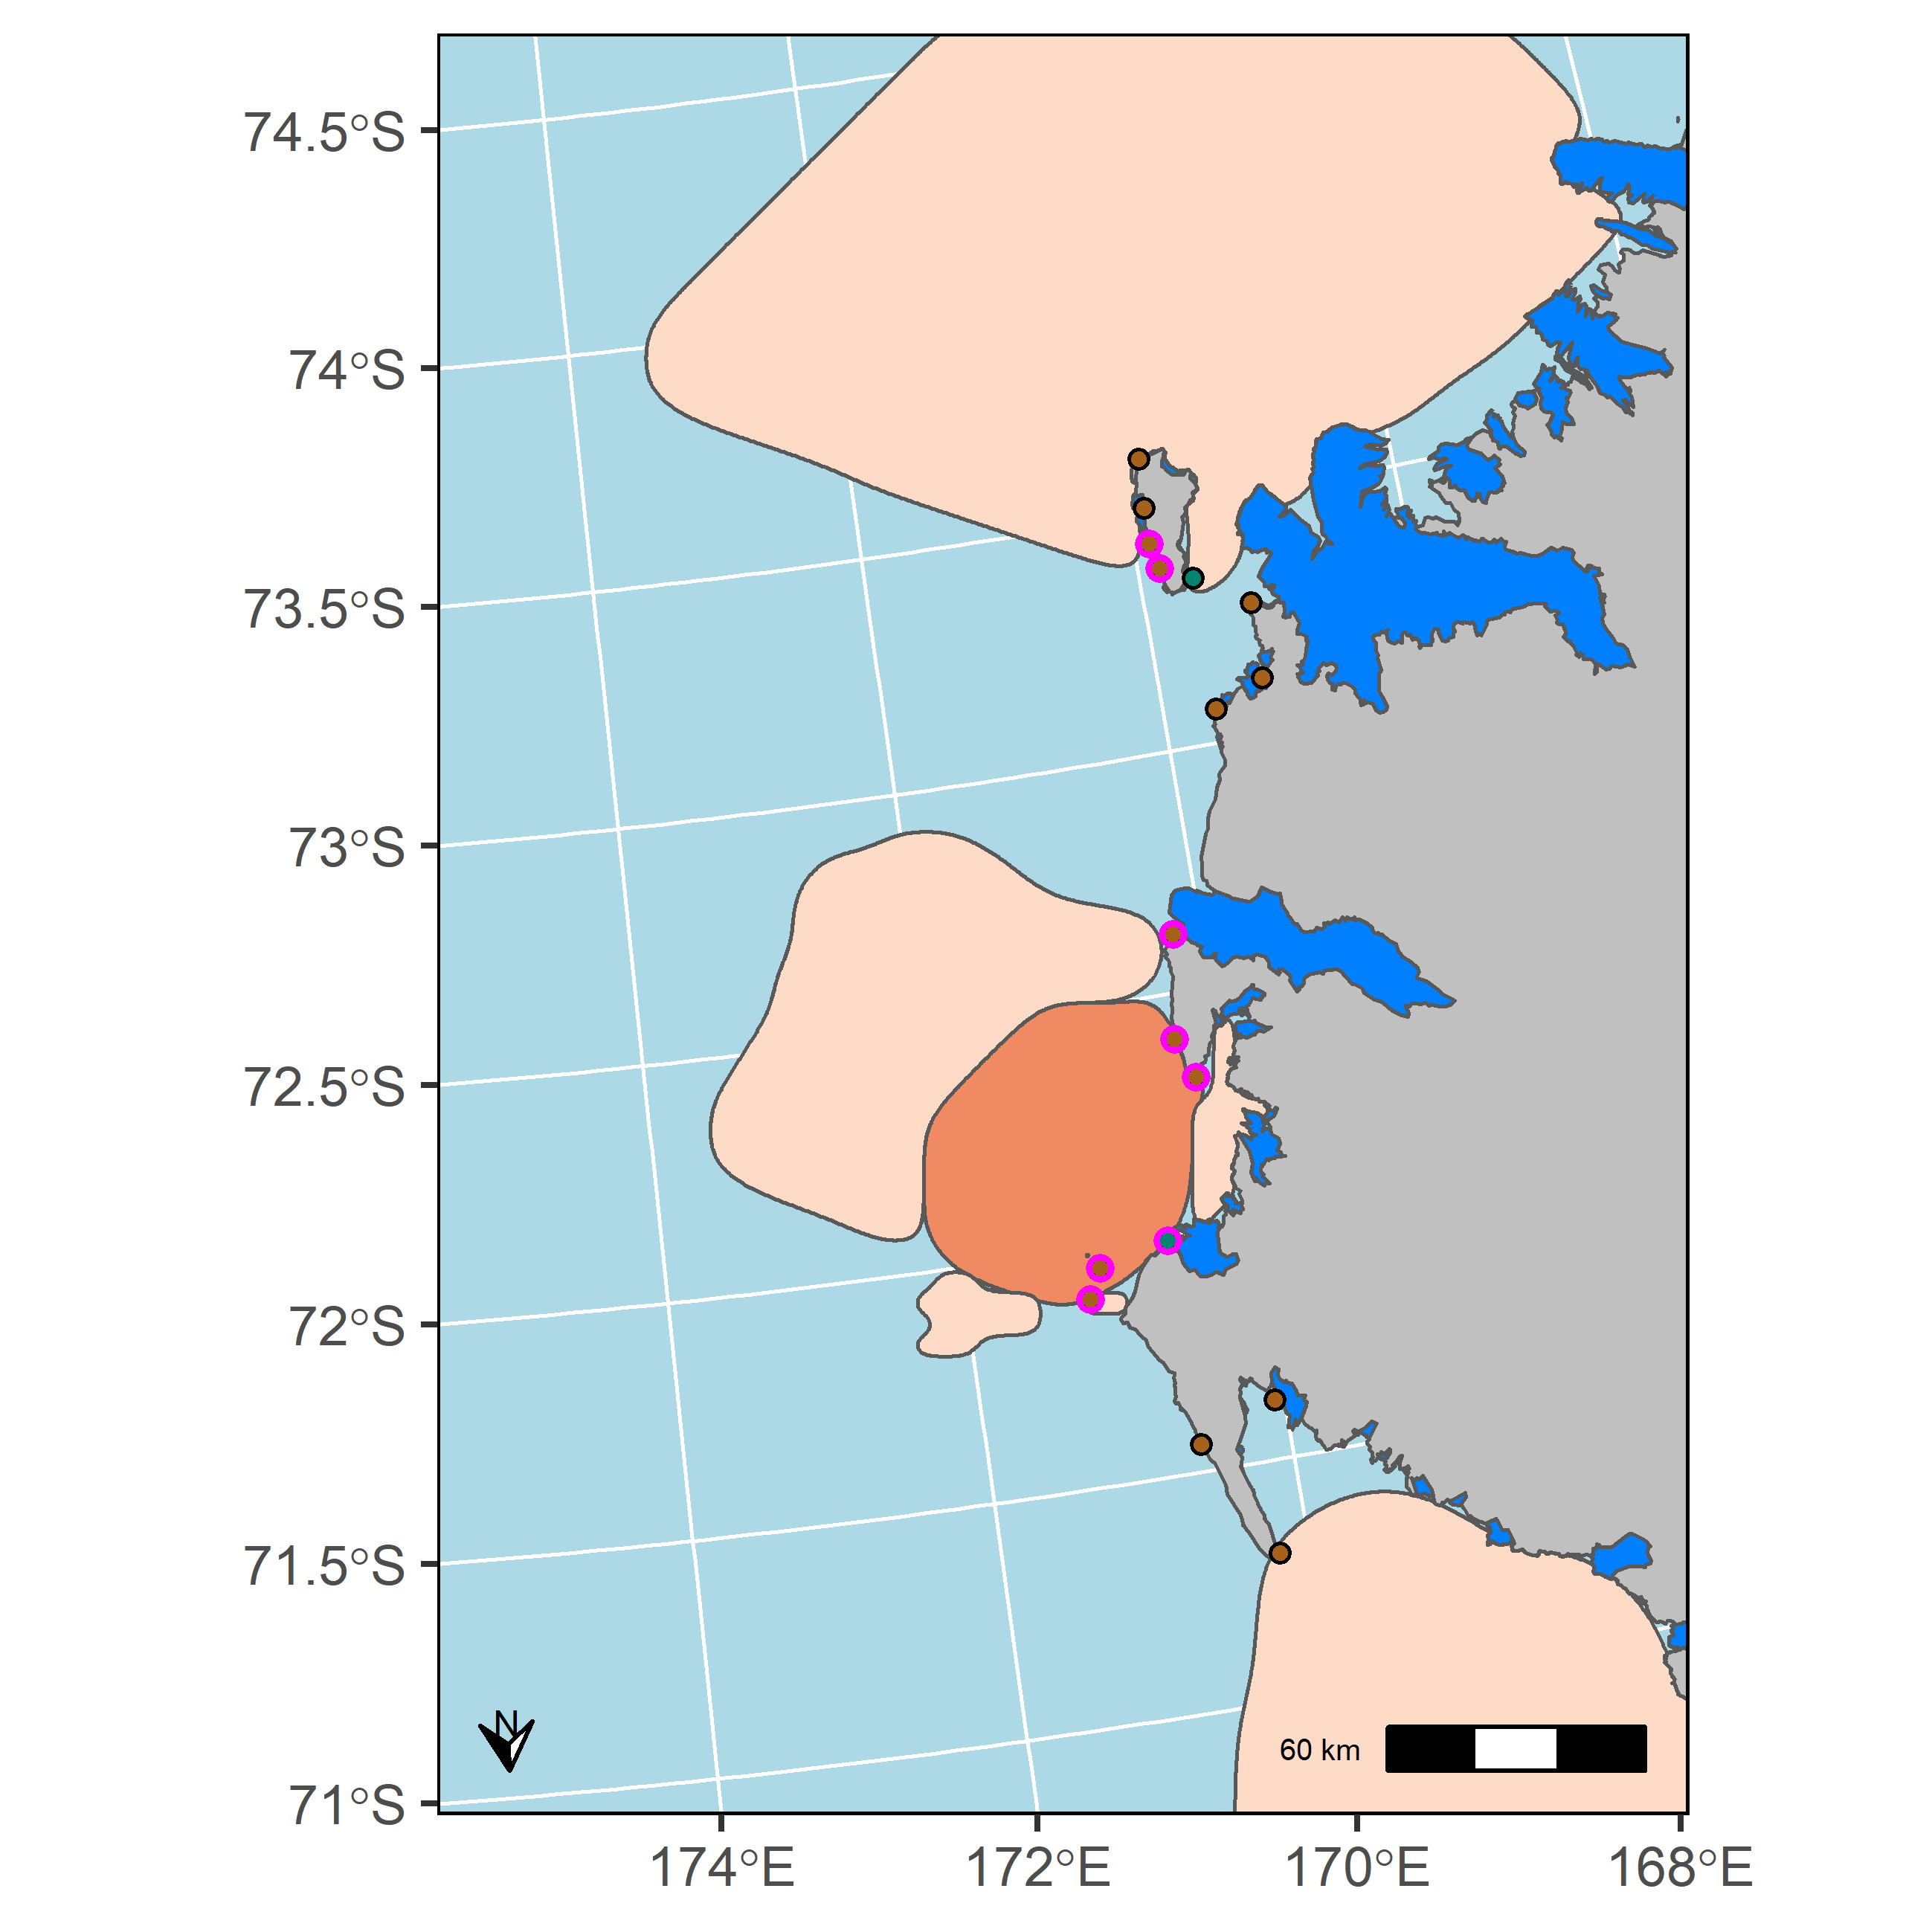


Figure A47.1: Focal Antarctica marine IBA 47 (orange polygon) for penguins, and other marine IBAs (light orange) for penguins identified during the project. Colonies circled in purple are those whose populations contributed to the marine IBA triggering IBA criteria A4 (>1% of the global population). See Table A47.2.

Table A47.1: Population estimates and count types (those that triggered IBA Criteria A4, >1% of global population) for key penguin species in Antarctic marine IBA 47. Key sources of colony input data associated with this marine IBA are detailed in Table A47.2. Population estimates refer to the lower and upper estimated number of adult breeding pairs likely to be using the marine IBA; derived from summing over all cells from individual colony density distribution surfaces which contributed to the identification of the marine IBA.

| Site code | Species | Count type | Lower | Upper |
| --- | --- | --- | --- | --- |
| 47 | ADP | min | 46301 | 102689 |
| 47 | ADP | max | 112659 | 239983 |
| 47 | ADP | median | 83248 | 182324 |
| 47 | ADP | recent | 103343 | 227524 |
| 47 | EMP | max | 4002 | 9505 |
| 47 | EMP | median | 2569 | 6102 |
| 47 | EMP | recent | 2640 | 6270 |

Table A47.2: Population estimates (adult breeding pairs) and count types from individual colony(ies) density distribution surfaces which contributed to the identification of marine IBA: 47. I.e. The lower and upper estimated number of adult breeding pairs from a given colony that may utilise the marine IBA. Note, the lower population estimate represents the lowest estimated number of breeding pairs from a given colony contributing to the delineation of the marine IBA site. The lower population estimate may therefore be zero when only part of the individual colony(ies) density distribution surface contributed to the marine IBA. *The Count Year for the median population estimate indicates the number of yearly population assessments for the given colony. Colony names are given in the ‘Colony Codes’ table at the end of this document.

| Site code | Species | Colony | Count type | Lower | Upper | Count year* |
| --- | --- | --- | --- | --- | --- | --- |
| 47 | ADP | CHAL | min | 8429 | 24848 | 2006 |
| 47 | ADP | CHAL | max | 22497 | 66319 | 1987 |
| 47 | ADP | CHAL | median | 16115 | 47505 | 17 |
| 47 | ADP | CHAL | recent | 16001 | 47169 | 2013 |
| 47 | ADP | CMID | min | 0 | 373 | 1998 |
| 47 | ADP | CMID | max | 0 | 1299 | 2013 |
| 47 | ADP | CMID | median | 0 | 616 | 14 |
| 47 | ADP | CMID | recent | 0 | 1299 | 2013 |
| 47 | ADP | CNOR | min | 0 | 78 | 2010 |
| 47 | ADP | CNOR | max | 0 | 427 | 2013 |
| 47 | ADP | CNOR | median | 0 | 291 | 11 |
| 47 | ADP | CNOR | recent | 0 | 427 | 2013 |
| 47 | ADP | COTT | min | 6960 | 18791 | 2006 |
| 47 | ADP | COTT | max | 19223 | 51901 | 1987 |
| 47 | ADP | COTT | median | 13405 | 36194 | 10 |
| 47 | ADP | COTT | recent | 16090 | 43444 | 2013 |
| 47 | ADP | POSS | min | 23173 | 66444 | 2006 |
| 47 | ADP | POSS | max | 51969 | 149012 | 2013 |
| 47 | ADP | POSS | median | 41812 | 119887 | 5 |
| 47 | ADP | POSS | recent | 51969 | 149012 | 2013 |
| 47 | ADP | SVEN | min | 7061 | 19587 | 1990 |
| 47 | ADP | SVEN | max | 16067 | 44571 | 2013 |
| 47 | ADP | SVEN | median | 10647 | 29536 | 11 |
| 47 | ADP | SVEN | recent | 16067 | 44571 | 2013 |
| 47 | ADP | WHEA | min | 584 | 920 | 1998 |
| 47 | ADP | WHEA | max | 2257 | 3557 | 2006 |
| 47 | ADP | WHEA | median | 814 | 1282 | 12 |
| 47 | ADP | WHEA | recent | 786 | 1239 | 2013 |
| 47 | EMP | ROGE | max | 4002 | 9505 | 2009 |
| 47 | EMP | ROGE | median | 2569 | 6102 | 6 |
| 47 | EMP | ROGE | recent | 2640 | 6270 | 2012 |

# Antarctica marine IBA: 48

| Site code | 48 |
| --- | --- |
| Species | ADP |
| IBA criteria | A4: Congregations |
| Decimal Latitude | -72.2 |
| Decimal Longitude | 170.119 |
| Area (ha) | 38025.92 |
| Area (km2) | 380.2592 |
| MPA Overlap | Ross Sea MPA |
| MPA Type | Confirmed |
| MPA Zones | RS-GPZi |


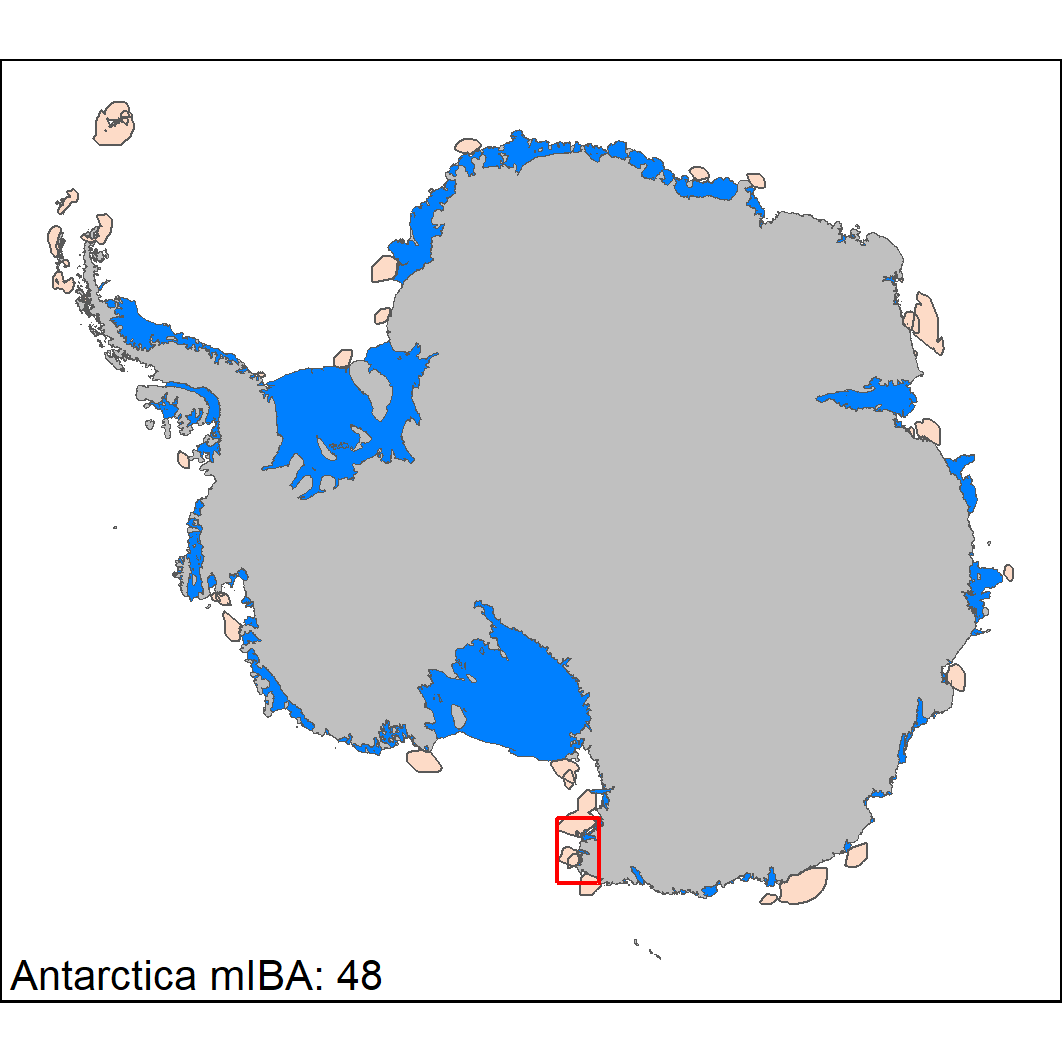


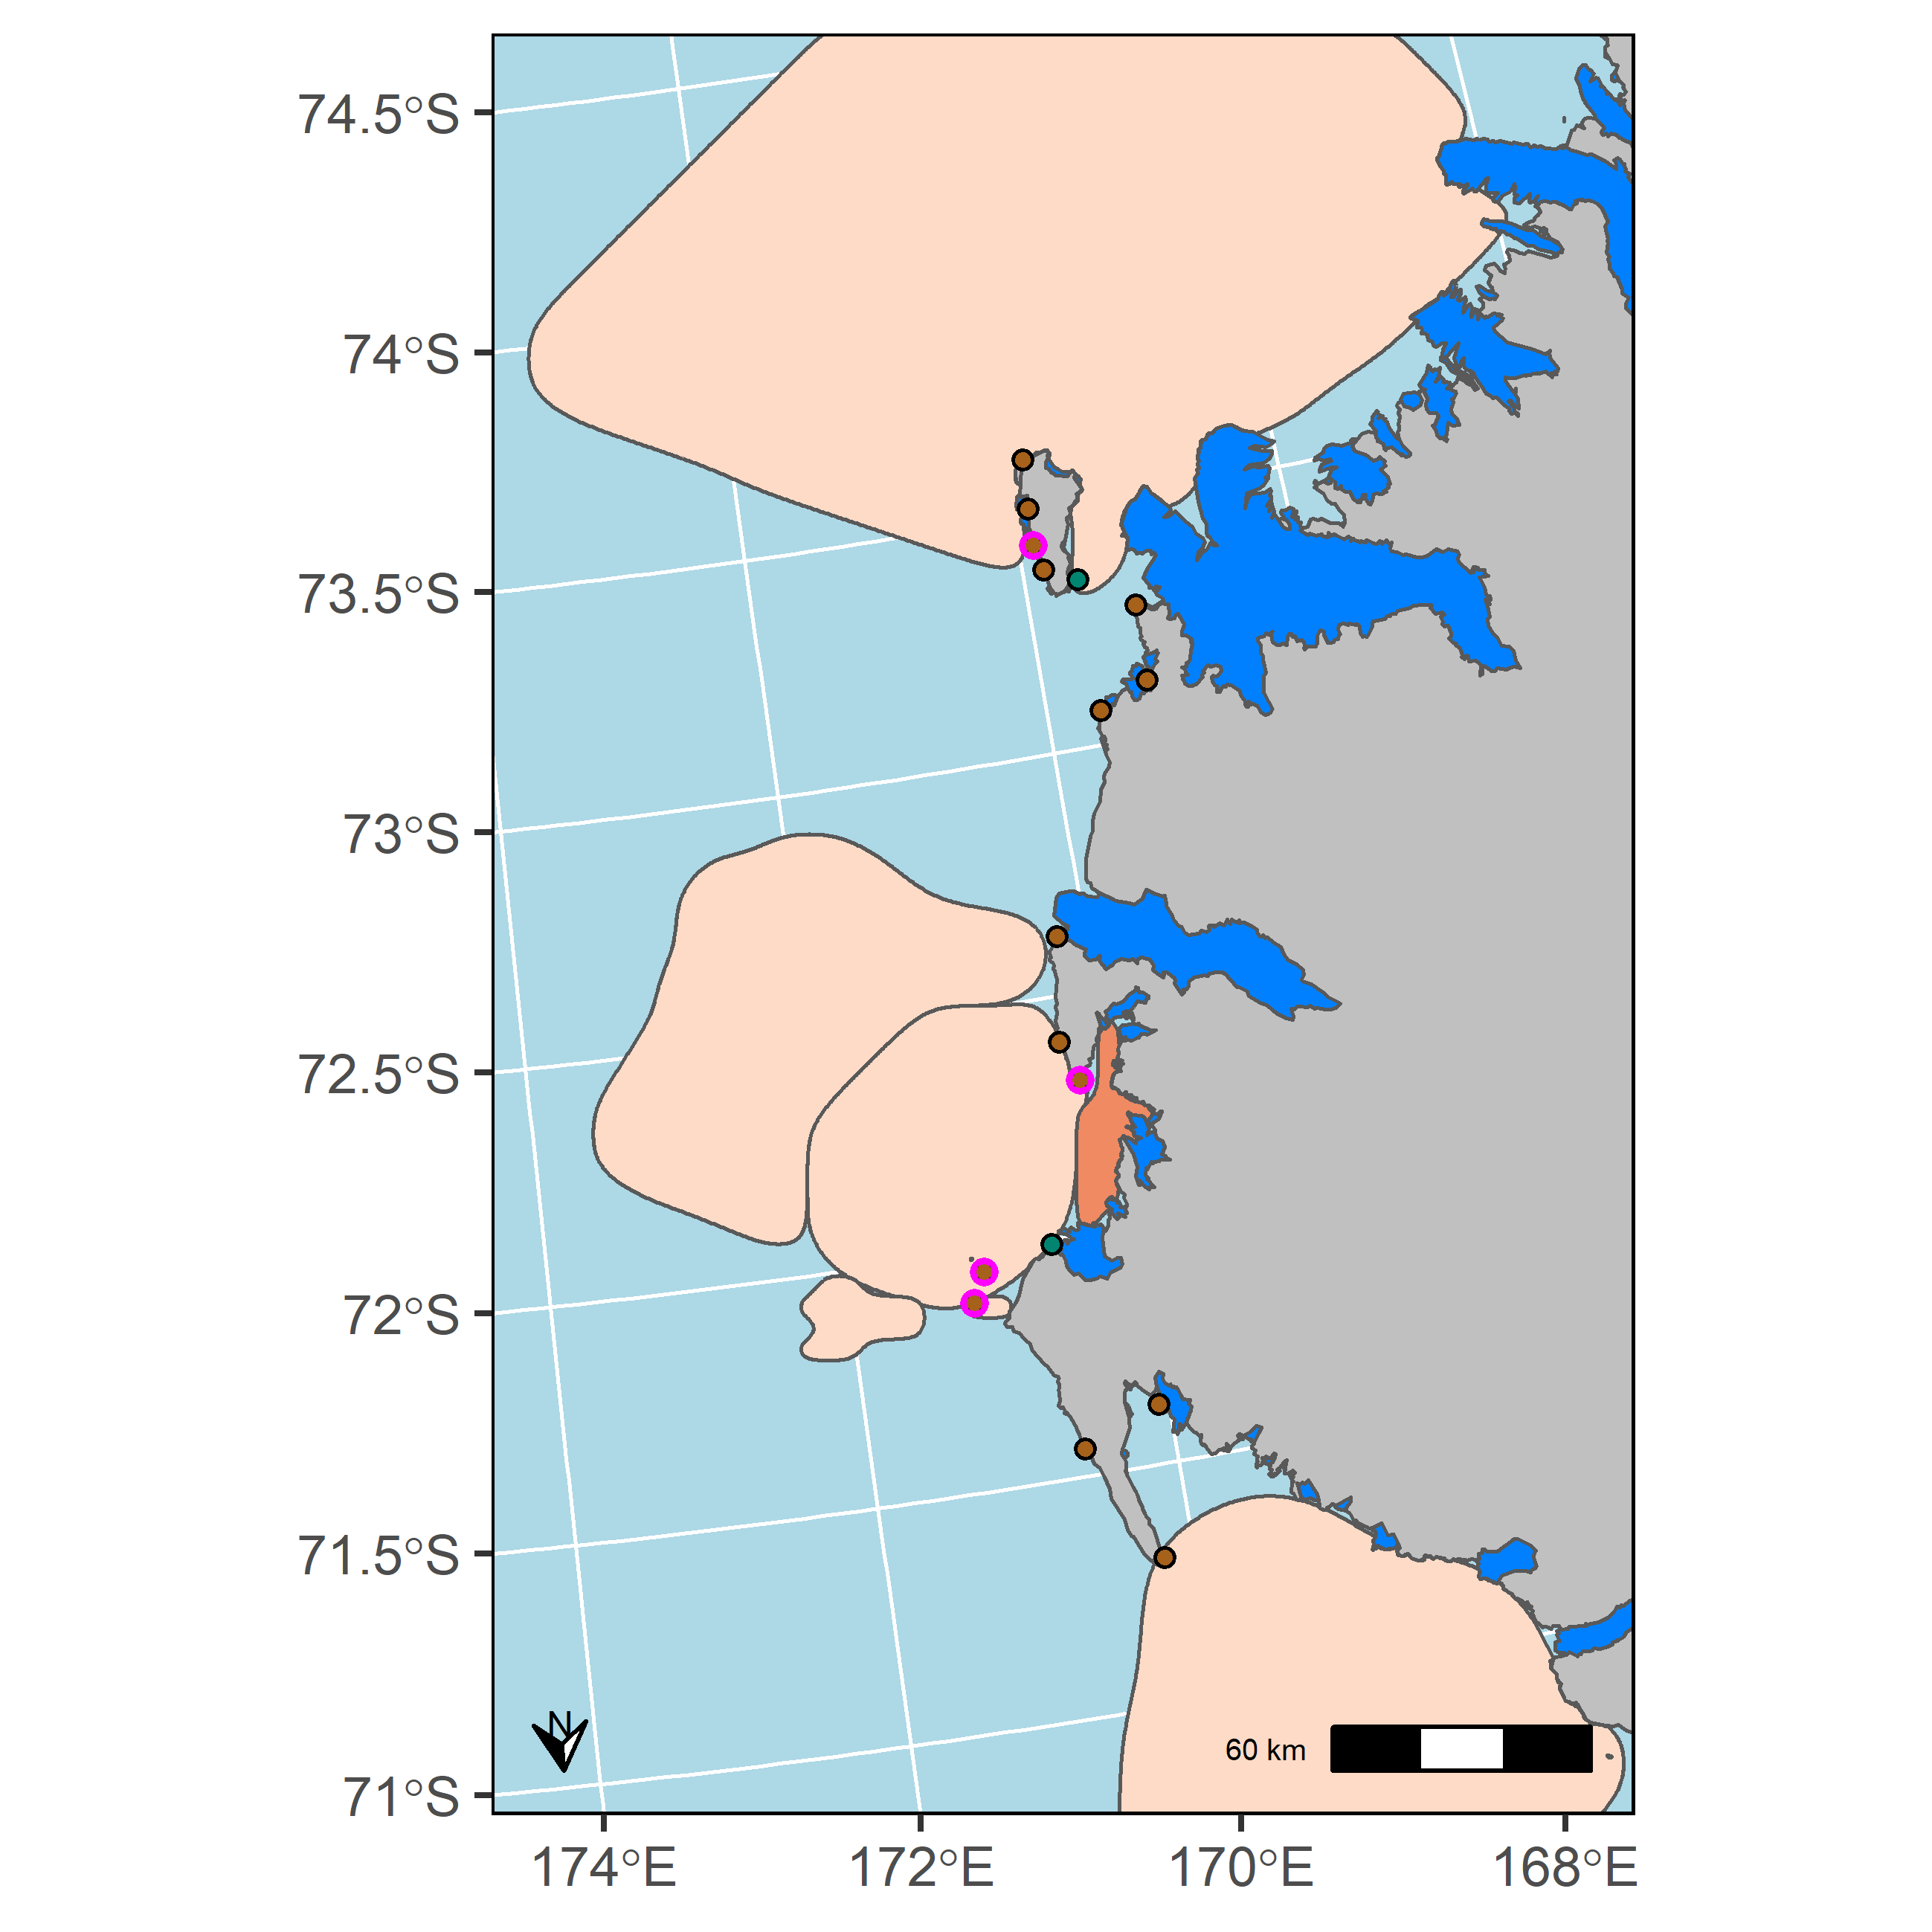


Figure A48.1: Focal Antarctica marine IBA 48 (orange polygon) for penguins, and other marine IBAs (light orange) for penguins identified during the project. Colonies circled in purple are those whose populations contributed to the marine IBA triggering IBA criteria A4 (>1% of the global population). See Table A48.2.

Table A48.1: Population estimates and count types (those that triggered IBA Criteria A4, >1% of global population) for key penguin species in Antarctic marine IBA 48. Key sources of colony input data associated with this marine IBA are detailed in Table A48.2. Population estimates refer to the lower and upper estimated number of adult breeding pairs likely to be using the marine IBA; derived from summing over all cells from individual colony density distribution surfaces which contributed to the identification of the marine IBA.

| Site code | Species | Count type | Lower | Upper |
| --- | --- | --- | --- | --- |
| 48 | ADP | max | 74993 | 159149 |
| 48 | ADP | median | 57922 | 121120 |
| 48 | ADP | recent | 74993 | 148880 |

Table A48.2: Population estimates (adult breeding pairs) and count types from individual colony(ies) density distribution surfaces which contributed to the identification of marine IBA: 48. I.e. The lower and upper estimated number of adult breeding pairs from a given colony that may utilise the marine IBA. Note, the lower population estimate represents the lowest estimated number of breeding pairs from a given colony contributing to the delineation of the marine IBA site. The lower population estimate may therefore be zero when only part of the individual colony(ies) density distribution surface contributed to the marine IBA. *The Count Year for the median population estimate indicates the number of yearly population assessments for the given colony. Colony names are given in the ‘Colony Codes’ table at the end of this document.

| Site code | Species | Colony | Count type | Lower | Upper | Count year* |
| --- | --- | --- | --- | --- | --- | --- |
| 48 | ADP | CHAL | max | 35563 | 52621 | 1987 |
| 48 | ADP | CHAL | median | 25474 | 37693 | 17 |
| 48 | ADP | CHAL | recent | 25294 | 37426 | 2013 |
| 48 | ADP | CMID | max | 1 | 198 | 2013 |
| 48 | ADP | CMID | median | 1 | 94 | 14 |
| 48 | ADP | CMID | recent | 1 | 198 | 2013 |
| 48 | ADP | POSS | max | 57986 | 96907 | 2013 |
| 48 | ADP | POSS | median | 46652 | 77966 | 5 |
| 48 | ADP | POSS | recent | 57986 | 96907 | 2013 |
| 48 | ADP | SVEN | max | 17007 | 26679 | 2013 |
| 48 | ADP | SVEN | median | 11270 | 17679 | 11 |
| 48 | ADP | SVEN | recent | 17007 | 26679 | 2013 |

# Antarctica marine IBA: 49

| Site code | 49 |
| --- | --- |
| Species | ADP |
| IBA criteria | A4: Congregations |
| Decimal Latitude | -72.536 |
| Decimal Longitude | 172.149 |
| Area (ha) | 528448.5 |
| Area (km2) | 5284.485 |
| MPA Overlap | Ross Sea MPA |
| MPA Type | Confirmed |
| MPA Zones | RS-GPZi |


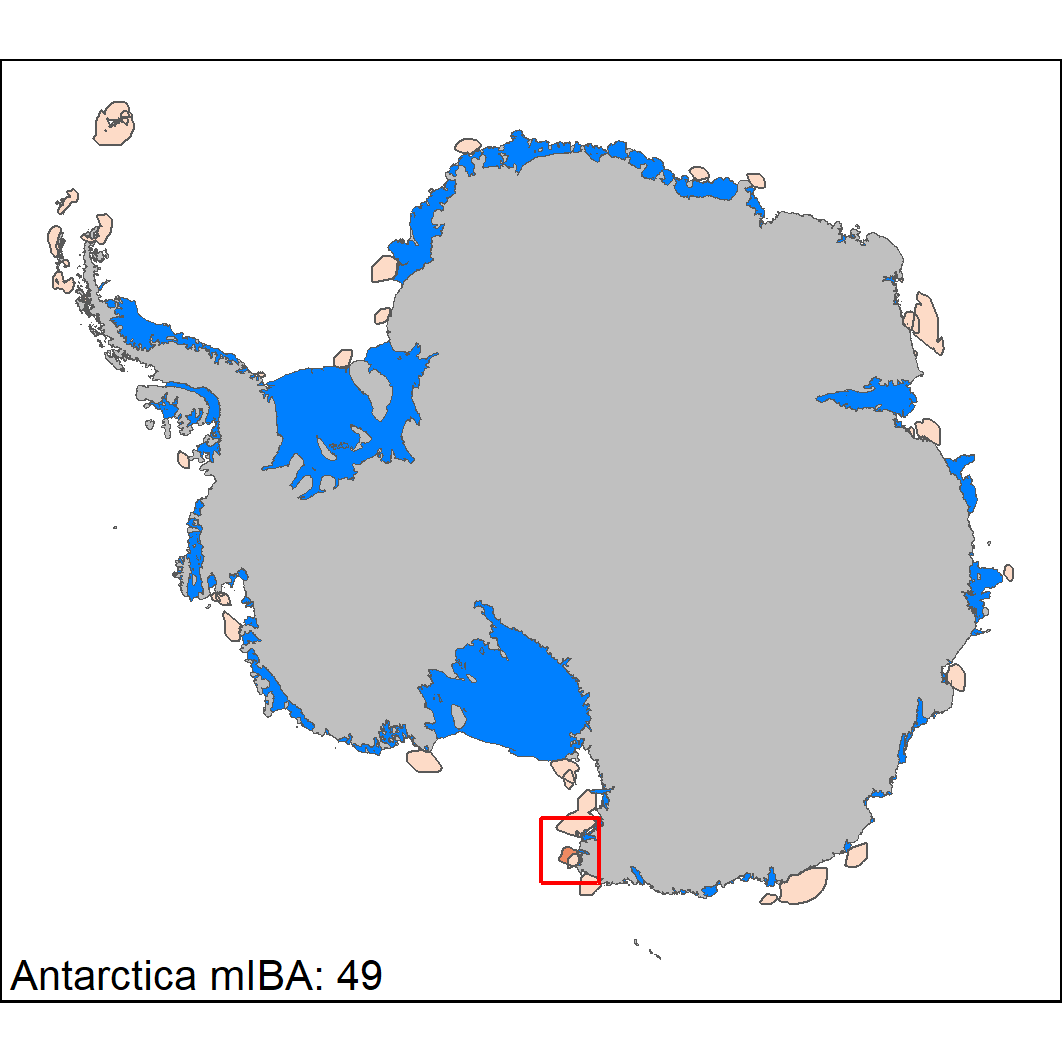


Figure A49.1: Focal Antarctica marine IBA 49 (orange polygon) for penguins, and other marine IBAs (light orange) for penguins identified during the project. Colonies circled in purple are those whose populations contributed to the marine IBA triggering IBA criteria A4 (>1% of the global population). See Table A49.2.

Table A49.1: Population estimates and count types (those that triggered IBA Criteria A4, >1% of global population) for key penguin species in Antarctic marine IBA 49. Key sources of colony input data associated with this marine IBA are detailed in Table A49.2. Population estimates refer to the lower and upper estimated number of adult breeding pairs likely to be using the marine IBA; derived from summing over all cells from individual colony density distribution surfaces which contributed to the identification of the marine IBA.

| Site code | Species | Count type | Lower | Upper |
| --- | --- | --- | --- | --- |
| 49 | ADP | max | 49399 | 151544 |
| 49 | ADP | median | 38210 | 110415 |
| 49 | ADP | recent | 45645 | 132186 |

Table A49.2: Population estimates (adult breeding pairs) and count types from individual colony(ies) density distribution surfaces which contributed to the identification of marine IBA: 49. I.e. The lower and upper estimated number of adult breeding pairs from a given colony that may utilise the marine IBA. Note, the lower population estimate represents the lowest estimated number of breeding pairs from a given colony contributing to the delineation of the marine IBA site. The lower population estimate may therefore be zero when only part of the individual colony(ies) density distribution surface contributed to the marine IBA. *The Count Year for the median population estimate indicates the number of yearly population assessments for the given colony. Colony names are given in the ‘Colony Codes’ table at the end of this document.

| Site code | Species | Colony | Count type | Lower | Upper | Count year* |
| --- | --- | --- | --- | --- | --- | --- |
| 49 | ADP | CHAL | max | 4767 | 39269 | 1987 |
| 49 | ADP | CHAL | median | 3414 | 28129 | 17 |
| 49 | ADP | CHAL | recent | 3390 | 27930 | 2013 |
| 49 | ADP | CMID | max | 0 | 3151 | 2013 |
| 49 | ADP | CMID | median | 0 | 1496 | 14 |
| 49 | ADP | CMID | recent | 0 | 3151 | 2013 |
| 49 | ADP | CNOR | max | 0 | 821 | 2013 |
| 49 | ADP | CNOR | median | 0 | 560 | 11 |
| 49 | ADP | CNOR | recent | 0 | 821 | 2013 |
| 49 | ADP | COTT | max | 6982 | 39715 | 1987 |
| 49 | ADP | COTT | median | 4869 | 27696 | 10 |
| 49 | ADP | COTT | recent | 5844 | 33243 | 2013 |
| 49 | ADP | MAND | max | 1617 | 6407 | 2013 |
| 49 | ADP | MAND | median | 1099 | 4358 | 7 |
| 49 | ADP | MAND | recent | 1617 | 6407 | 2013 |
| 49 | ADP | PHIL | max | 1923 | 3118 | 2013 |
| 49 | ADP | PHIL | median | 783 | 1269 | 8 |
| 49 | ADP | PHIL | recent | 1923 | 3118 | 2013 |
| 49 | ADP | POSS | max | 19942 | 81856 | 2013 |
| 49 | ADP | POSS | median | 16045 | 65857 | 5 |
| 49 | ADP | POSS | recent | 19942 | 81856 | 2013 |
| 49 | ADP | SVEN | max | 5896 | 19555 | 2013 |
| 49 | ADP | SVEN | median | 3907 | 12959 | 11 |
| 49 | ADP | SVEN | recent | 5896 | 19555 | 2013 |
| 49 | ADP | WHEA | max | 573 | 5292 | 2006 |
| 49 | ADP | WHEA | median | 207 | 1908 | 12 |
| 49 | ADP | WHEA | recent | 200 | 1844 | 2013 |

# Antarctica marine IBA: 50

| Site code | 50 |
| --- | --- |
| Species | EMP |
| IBA criteria | A4: Congregations |
| Decimal Latitude | -74.385 |
| Decimal Longitude | 168.539 |
| Area (ha) | 3139022 |
| Area (km2) | 31390.22 |
| MPA Overlap | Ross Sea MPA |
| MPA Type | Confirmed |
| MPA Zones | RS-GPZi |

Figure A50.1: Focal Antarctica marine IBA 50 (orange polygon) for penguins, and other marine IBAs (light orange) for penguins identified during the project. Colonies circled in purple are those whose populations contributed to the marine IBA triggering IBA criteria A4 (>1% of the global population). See Table A50.2.

Table A50.1: Population estimates and count types (those that triggered IBA Criteria A4, >1% of global population) for key penguin species in Antarctic marine IBA 50. Key sources of colony input data associated with this marine IBA are detailed in Table A50.2. Population estimates refer to the lower and upper estimated number of adult breeding pairs likely to be using the marine IBA; derived from summing over all cells from individual colony density distribution surfaces which contributed to the identification of the marine IBA.

| Site code | Species | Count type | Lower | Upper |
| --- | --- | --- | --- | --- |
| 50 | EMP | max | 3226 | 31432 |
| 50 | EMP | median | 2592 | 25417 |
| 50 | EMP | recent | 2610 | 25428 |

Table A50.2: Population estimates (adult breeding pairs) and count types from individual colony(ies) density distribution surfaces which contributed to the identification of marine IBA: 50. I.e. The lower and upper estimated number of adult breeding pairs from a given colony that may utilise the marine IBA. Note, the lower population estimate represents the lowest estimated number of breeding pairs from a given colony contributing to the delineation of the marine IBA site. The lower population estimate may therefore be zero when only part of the individual colony(ies) density distribution surface contributed to the marine IBA. *The Count Year for the median population estimate indicates the number of yearly population assessments for the given colony. Colony names are given in the ‘Colony Codes’ table at the end of this document.

| Site code | Species | Colony | Count type | Lower | Upper | Count year* |
| --- | --- | --- | --- | --- | --- | --- |
| 50 | EMP | BEAU | max | 0 | 122 | 2010 |
| 50 | EMP | BEAU | median | 0 | 64 | 13 |
| 50 | EMP | BEAU | recent | 0 | 47 | 2012 |
| 50 | EMP | COUL | max | 0 | 31432 | 2006 |
| 50 | EMP | COUL | median | 0 | 25417 | 8 |
| 50 | EMP | COUL | recent | 0 | 25428 | 2012 |
| 50 | EMP | ROGE | max | 0 | 161 | 2009 |
| 50 | EMP | ROGE | median | 0 | 104 | 6 |
| 50 | EMP | ROGE | recent | 0 | 106 | 2012 |
| 50 | EMP | WASH | max | 0 | 17096 | 2012 |
| 50 | EMP | WASH | median | 0 | 11808 | 9 |
| 50 | EMP | WASH | recent | 0 | 17096 | 2012 |

# Antarctica marine IBA: 51

| Site code | 51 |
| --- | --- |
| Species | EMP |
| IBA criteria | A4: Congregations |
| Decimal Latitude | -76.112 |
| Decimal Longitude | 169.844 |
| Area (ha) | 160528.1 |
| Area (km2) | 1605.281 |
| MPA Overlap | Ross Sea MPA |
| MPA Type | Confirmed |
| MPA Zones | RS-GPZi |

Figure A51.1: Focal Antarctica marine IBA 51 (orange polygon) for penguins, and other marine IBAs (light orange) for penguins identified during the project. Colonies circled in purple are those whose populations contributed to the marine IBA triggering IBA criteria A4 (>1% of the global population). See Table A51.2.

Table A51.1: Population estimates and count types (those that triggered IBA Criteria A4, >1% of global population) for key penguin species in Antarctic marine IBA 51. Key sources of colony input data associated with this marine IBA are detailed in Table A51.2. Population estimates refer to the lower and upper estimated number of adult breeding pairs likely to be using the marine IBA; derived from summing over all cells from individual colony density distribution surfaces which contributed to the identification of the marine IBA.

| Site code | Species | Count type | Lower | Upper |
| --- | --- | --- | --- | --- |
| 51 | EMP | max | 3900 | 6047 |
| 51 | EMP | median | 2567 | 4011 |
| 51 | EMP | recent | 3504 | 5439 |

Table A51.2: Population estimates (adult breeding pairs) and count types from individual colony(ies) density distribution surfaces which contributed to the identification of marine IBA: 51. I.e. The lower and upper estimated number of adult breeding pairs from a given colony that may utilise the marine IBA. Note, the lower population estimate represents the lowest estimated number of breeding pairs from a given colony contributing to the delineation of the marine IBA site. The lower population estimate may therefore be zero when only part of the individual colony(ies) density distribution surface contributed to the marine IBA. *The Count Year for the median population estimate indicates the number of yearly population assessments for the given colony. Colony names are given in the ‘Colony Codes’ table at the end of this document.

| Site code | Species | Colony | Count type | Lower | Upper | Count year* |
| --- | --- | --- | --- | --- | --- | --- |
| 51 | EMP | BEAU | max | 123 | 508 | 2010 |
| 51 | EMP | BEAU | median | 64 | 266 | 13 |
| 51 | EMP | BEAU | recent | 47 | 194 | 2012 |
| 51 | EMP | CROZ | max | 0 | 177 | 2012 |
| 51 | EMP | CROZ | median | 0 | 70 | 11 |
| 51 | EMP | CROZ | recent | 0 | 177 | 2012 |
| 51 | EMP | FRAN | max | 3386 | 5654 | 2009 |
| 51 | EMP | FRAN | median | 2279 | 3806 | 11 |
| 51 | EMP | FRAN | recent | 3168 | 5289 | 2012 |

# Antarctica marine IBA: 52

| Site code | 52 |
| --- | --- |
| Species | ADP,EMP |
| IBA criteria | A4: Congregations |
| Decimal Latitude | -76.48 |
| Decimal Longitude | 169.272 |
| Area (ha) | 301323.8 |
| Area (km2) | 3013.238 |
| MPA Overlap | Ross Sea MPA |
| MPA Type | Confirmed |
| MPA Zones | RS-GPZi |

Figure A52.1: Focal Antarctica marine IBA 52 (orange polygon) for penguins, and other marine IBAs (light orange) for penguins identified during the project. Colonies circled in purple are those whose populations contributed to the marine IBA triggering IBA criteria A4 (>1% of the global population). See Table A52.2.

Table A52.1: Population estimates and count types (those that triggered IBA Criteria A4, >1% of global population) for key penguin species in Antarctic marine IBA 52. Key sources of colony input data associated with this marine IBA are detailed in Table A52.2. Population estimates refer to the lower and upper estimated number of adult breeding pairs likely to be using the marine IBA; derived from summing over all cells from individual colony density distribution surfaces which contributed to the identification of the marine IBA.

| Site code | Species | Count type | Lower | Upper |
| --- | --- | --- | --- | --- |
| 52 | ADP | max | 67222 | 178557 |
| 52 | ADP | median | 38928 | 103123 |
| 52 | ADP | recent | 38871 | 158881 |
| 52 | EMP | max | 4042 | 8102 |
| 52 | EMP | median | 2573 | 5371 |
| 52 | EMP | recent | 3239 | 7280 |

Table A52.2: Population estimates (adult breeding pairs) and count types from individual colony(ies) density distribution surfaces which contributed to the identification of marine IBA: 52. I.e. The lower and upper estimated number of adult breeding pairs from a given colony that may utilise the marine IBA. Note, the lower population estimate represents the lowest estimated number of breeding pairs from a given colony contributing to the delineation of the marine IBA site. The lower population estimate may therefore be zero when only part of the individual colony(ies) density distribution surface contributed to the marine IBA. *The Count Year for the median population estimate indicates the number of yearly population assessments for the given colony. Colony names are given in the ‘Colony Codes’ table at the end of this document.

| Site code | Species | Colony | Count type | Lower | Upper | Count year* |
| --- | --- | --- | --- | --- | --- | --- |
| 52 | ADP | BEAN | max | 170 | 466 | 2013 |
| 52 | ADP | BEAN | median | 93 | 257 | 5 |
| 52 | ADP | BEAN | recent | 170 | 466 | 2013 |
| 52 | ADP | BEAU | max | 10180 | 31690 | 2013 |
| 52 | ADP | BEAU | median | 6148 | 19140 | 19 |
| 52 | ADP | BEAU | recent | 10180 | 31690 | 2013 |
| 52 | ADP | BRDM | max | 0 | 1592 | 2012 |
| 52 | ADP | BRDM | median | 0 | 855 | 30 |
| 52 | ADP | BRDM | recent | 0 | 1407 | 2013 |
| 52 | ADP | BRDN | max | 2 | 15444 | 2012 |
| 52 | ADP | BRDN | median | 1 | 9490 | 31 |
| 52 | ADP | BRDN | recent | 2 | 13882 | 2013 |
| 52 | ADP | BRDS | max | 1 | 5316 | 2012 |
| 52 | ADP | BRDS | median | 0 | 3087 | 31 |
| 52 | ADP | BRDS | recent | 0 | 4437 | 2013 |
| 52 | ADP | CROZ | max | 6 | 95248 | 2009 |
| 52 | ADP | CROZ | median | 3 | 53525 | 28 |
| 52 | ADP | CROZ | recent | 6 | 94665 | 2013 |
| 52 | ADP | FRAE | max | 631 | 1944 | 2005 |
| 52 | ADP | FRAE | median | 314 | 966 | 12 |
| 52 | ADP | FRAE | recent | 83 | 255 | 2011 |
| 52 | ADP | FRAW | max | 27947 | 94338 | 2005 |
| 52 | ADP | FRAW | median | 16246 | 54840 | 10 |
| 52 | ADP | FRAW | recent | 12246 | 41339 | 2011 |
| 52 | ADP | ROYD | max | 0 | 550 | 1987 |
| 52 | ADP | ROYD | median | 0 | 394 | 32 |
| 52 | ADP | ROYD | recent | 0 | 406 | 2013 |
| 52 | EMP | BEAU | max | 446 | 1024 | 2010 |
| 52 | EMP | BEAU | median | 233 | 535 | 13 |
| 52 | EMP | BEAU | recent | 171 | 392 | 2012 |
| 52 | EMP | CROZ | max | 177 | 398 | 2012 |
| 52 | EMP | CROZ | median | 70 | 157 | 11 |
| 52 | EMP | CROZ | recent | 177 | 398 | 2012 |
| 52 | EMP | FRAN | max | 3063 | 7561 | 2009 |
| 52 | EMP | FRAN | median | 2061 | 5089 | 11 |
| 52 | EMP | FRAN | recent | 2865 | 7073 | 2012 |

# Antarctica marine IBA: 53

| Site code | 53 |
| --- | --- |
| Species | ADP |
| IBA criteria | A4: Congregations |
| Decimal Latitude | -76.263 |
| Decimal Longitude | 168.237 |
| Area (ha) | 4324.253 |
| Area (km2) | 43.24253 |
| MPA Overlap | Ross Sea MPA |
| MPA Type | Confirmed |
| MPA Zones | RS-GPZi |

Figure A53.1: Focal Antarctica marine IBA 53 (orange polygon) for penguins, and other marine IBAs (light orange) for penguins identified during the project. Colonies circled in purple are those whose populations contributed to the marine IBA triggering IBA criteria A4 (>1% of the global population). See Table A53.2.

Table A53.1: Population estimates and count types (those that triggered IBA Criteria A4, >1% of global population) for key penguin species in Antarctic marine IBA 53. Key sources of colony input data associated with this marine IBA are detailed in Table A53.2. Population estimates refer to the lower and upper estimated number of adult breeding pairs likely to be using the marine IBA; derived from summing over all cells from individual colony density distribution surfaces which contributed to the identification of the marine IBA.

| Site code | Species | Count type | Lower | Upper |
| --- | --- | --- | --- | --- |
| 53 | ADP | max | 95072 | 102587 |
| 53 | ADP | median | 55504 | 59767 |
| 53 | ADP | recent | 58036 | 68729 |

Table A53.2: Population estimates (adult breeding pairs) and count types from individual colony(ies) density distribution surfaces which contributed to the identification of marine IBA: 53. I.e. The lower and upper estimated number of adult breeding pairs from a given colony that may utilise the marine IBA. Note, the lower population estimate represents the lowest estimated number of breeding pairs from a given colony contributing to the delineation of the marine IBA site. The lower population estimate may therefore be zero when only part of the individual colony(ies) density distribution surface contributed to the marine IBA. *The Count Year for the median population estimate indicates the number of yearly population assessments for the given colony. Colony names are given in the ‘Colony Codes’ table at the end of this document.

| Site code | Species | Colony | Count type | Lower | Upper | Count year* |
| --- | --- | --- | --- | --- | --- | --- |
| 53 | ADP | BEAN | max | 275 | 276 | 2013 |
| 53 | ADP | BEAN | median | 151 | 152 | 5 |
| 53 | ADP | BEAN | recent | 275 | 276 | 2013 |
| 53 | ADP | BEAU | max | 15212 | 17318 | 2013 |
| 53 | ADP | BEAU | median | 9188 | 10460 | 19 |
| 53 | ADP | BEAU | recent | 15212 | 17318 | 2013 |
| 53 | ADP | BRDM | max | 337 | 478 | 2012 |
| 53 | ADP | BRDM | median | 181 | 257 | 30 |
| 53 | ADP | BRDM | recent | 298 | 422 | 2013 |
| 53 | ADP | BRDN | max | 3264 | 4632 | 2012 |
| 53 | ADP | BRDN | median | 2006 | 2846 | 31 |
| 53 | ADP | BRDN | recent | 2934 | 4164 | 2013 |
| 53 | ADP | BRDS | max | 1332 | 1337 | 2012 |
| 53 | ADP | BRDS | median | 774 | 777 | 31 |
| 53 | ADP | BRDS | recent | 1112 | 1116 | 2013 |
| 53 | ADP | CROZ | max | 9884 | 19820 | 2009 |
| 53 | ADP | CROZ | median | 5554 | 11138 | 28 |
| 53 | ADP | CROZ | recent | 9823 | 19698 | 2013 |
| 53 | ADP | FRAW | max | 58725 | 64768 | 2005 |
| 53 | ADP | FRAW | median | 34138 | 37651 | 10 |
| 53 | ADP | FRAW | recent | 25734 | 28382 | 2011 |

# Antarctica marine IBA: 54

| Site code | 54 |
| --- | --- |
| Species | ADP |
| IBA criteria | A4: Congregations |
| Decimal Latitude | -77.003 |
| Decimal Longitude | 169.968 |
| Area (ha) | 1080217 |
| Area (km2) | 10802.17 |
| MPA Overlap | Ross Sea MPA |
| MPA Type | Confirmed |
| MPA Zones | RS-GPZi |

Figure A54.1: Focal Antarctica marine IBA 54 (orange polygon) for penguins, and other marine IBAs (light orange) for penguins identified during the project. Colonies circled in purple are those whose populations contributed to the marine IBA triggering IBA criteria A4 (>1% of the global population). See Table A54.2.

Table A54.1: Population estimates and count types (those that triggered IBA Criteria A4, >1% of global population) for key penguin species in Antarctic marine IBA 54. Key sources of colony input data associated with this marine IBA are detailed in Table A54.2. Population estimates refer to the lower and upper estimated number of adult breeding pairs likely to be using the marine IBA; derived from summing over all cells from individual colony density distribution surfaces which contributed to the identification of the marine IBA.

| Site code | Species | Count type | Lower | Upper |
| --- | --- | --- | --- | --- |
| 54 | ADP | max | 62521 | 324656 |
| 54 | ADP | median | 37900 | 184154 |
| 54 | ADP | recent | 50838 | 320606 |

Table A54.2: Population estimates (adult breeding pairs) and count types from individual colony(ies) density distribution surfaces which contributed to the identification of marine IBA: 54. I.e. The lower and upper estimated number of adult breeding pairs from a given colony that may utilise the marine IBA. Note, the lower population estimate represents the lowest estimated number of breeding pairs from a given colony contributing to the delineation of the marine IBA site. The lower population estimate may therefore be zero when only part of the individual colony(ies) density distribution surface contributed to the marine IBA. *The Count Year for the median population estimate indicates the number of yearly population assessments for the given colony. Colony names are given in the ‘Colony Codes’ table at the end of this document.

| Site code | Species | Colony | Count type | Lower | Upper | Count year* |
| --- | --- | --- | --- | --- | --- | --- |
| 54 | ADP | BEAN | max | 0 | 989 | 2013 |
| 54 | ADP | BEAN | median | 0 | 544 | 5 |
| 54 | ADP | BEAN | recent | 0 | 989 | 2013 |
| 54 | ADP | BEAU | max | 3 | 70468 | 2013 |
| 54 | ADP | BEAU | median | 2 | 42561 | 19 |
| 54 | ADP | BEAU | recent | 3 | 70468 | 2013 |
| 54 | ADP | BRDM | max | 0 | 2918 | 2012 |
| 54 | ADP | BRDM | median | 0 | 1568 | 30 |
| 54 | ADP | BRDM | recent | 0 | 2580 | 2013 |
| 54 | ADP | BRDN | max | 0 | 28432 | 2012 |
| 54 | ADP | BRDN | median | 0 | 17471 | 31 |
| 54 | ADP | BRDN | recent | 0 | 25555 | 2013 |
| 54 | ADP | BRDS | max | 1 | 11131 | 2012 |
| 54 | ADP | BRDS | median | 0 | 6465 | 31 |
| 54 | ADP | BRDS | recent | 1 | 9292 | 2013 |
| 54 | ADP | CROZ | max | 28433 | 282515 | 2009 |
| 54 | ADP | CROZ | median | 15978 | 158760 | 28 |
| 54 | ADP | CROZ | recent | 28259 | 280787 | 2013 |
| 54 | ADP | FRAE | max | 0 | 666 | 2005 |
| 54 | ADP | FRAE | median | 0 | 331 | 12 |
| 54 | ADP | FRAE | recent | 0 | 87 | 2011 |
| 54 | ADP | FRAW | max | 1 | 50595 | 2005 |
| 54 | ADP | FRAW | median | 0 | 29412 | 10 |
| 54 | ADP | FRAW | recent | 0 | 22171 | 2011 |
| 54 | ADP | ROYD | max | 0 | 1582 | 1987 |
| 54 | ADP | ROYD | median | 0 | 1132 | 32 |
| 54 | ADP | ROYD | recent | 0 | 1168 | 2013 |

# Antarctica marine IBA: 55

| Site code | 55 |
| --- | --- |
| Species | EMP |
| IBA criteria | A4: Congregations |
| Decimal Latitude | -76.499 |
| Decimal Longitude | -157.705 |
| Area (ha) | 1834872 |
| Area (km2) | 18348.72 |
| MPA Overlap | Ross Sea MPA |
| MPA Type | Confirmed |
| MPA Zones | RS-GPZi |

Figure A55.1: Focal Antarctica marine IBA 55 (orange polygon) for penguins, and other marine IBAs (light orange) for penguins identified during the project. Colonies circled in purple are those whose populations contributed to the marine IBA triggering IBA criteria A4 (>1% of the global population). See Table A55.2.

Table A55.1: Population estimates and count types (those that triggered IBA Criteria A4, >1% of global population) for key penguin species in Antarctic marine IBA 55. Key sources of colony input data associated with this marine IBA are detailed in Table A55.2. Population estimates refer to the lower and upper estimated number of adult breeding pairs likely to be using the marine IBA; derived from summing over all cells from individual colony density distribution surfaces which contributed to the identification of the marine IBA.

| Site code | Species | Count type | Lower | Upper |
| --- | --- | --- | --- | --- |
| 55 | EMP | max | 3962 | 26266 |
| 55 | EMP | median | 2655 | 17602 |
| 55 | EMP | recent | 3226 | 21385 |

Table A55.2: Population estimates (adult breeding pairs) and count types from individual colony(ies) density distribution surfaces which contributed to the identification of marine IBA: 55. I.e. The lower and upper estimated number of adult breeding pairs from a given colony that may utilise the marine IBA. Note, the lower population estimate represents the lowest estimated number of breeding pairs from a given colony contributing to the delineation of the marine IBA site. The lower population estimate may therefore be zero when only part of the individual colony(ies) density distribution surface contributed to the marine IBA. *The Count Year for the median population estimate indicates the number of yearly population assessments for the given colony. Colony names are given in the ‘Colony Codes’ table at the end of this document.

| Site code | Species | Colony | Count type | Lower | Upper | Count year* |
| --- | --- | --- | --- | --- | --- | --- |
| 55 | EMP | CBEK | max | 3962 | 26266 | 2011 |
| 55 | EMP | CBEK | median | 2655 | 17602 | 4 |
| 55 | EMP | CBEK | recent | 3226 | 21385 | 2012 |

# Antarctica marine IBA: 56

| Site code | 56 |
| --- | --- |
| Species | EMP |
| IBA criteria | A4: Congregations |
| Decimal Latitude | -73.92 |
| Decimal Longitude | -109.924 |
| Area (ha) | 1062817 |
| Area (km2) | 10628.17 |
| MPA Overlap |  |
| MPA Type | NA |
| MPA Zones |  |

Figure A56.1: Focal Antarctica marine IBA 56 (orange polygon) for penguins, and other marine IBAs (light orange) for penguins identified during the project. Colonies circled in purple are those whose populations contributed to the marine IBA triggering IBA criteria A4 (>1% of the global population). See Table A56.2.

Table A56.1: Population estimates and count types (those that triggered IBA Criteria A4, >1% of global population) for key penguin species in Antarctic marine IBA 56. Key sources of colony input data associated with this marine IBA are detailed in Table A56.2. Population estimates refer to the lower and upper estimated number of adult breeding pairs likely to be using the marine IBA; derived from summing over all cells from individual colony density distribution surfaces which contributed to the identification of the marine IBA.

| Site code | Species | Count type | Lower | Upper |
| --- | --- | --- | --- | --- |
| 56 | EMP | min | 2586 | 9457 |
| 56 | EMP | max | 2586 | 9457 |
| 56 | EMP | median | 2586 | 9457 |
| 56 | EMP | recent | 2586 | 9457 |

Table A56.2: Population estimates (adult breeding pairs) and count types from individual colony(ies) density distribution surfaces which contributed to the identification of marine IBA: 56. I.e. The lower and upper estimated number of adult breeding pairs from a given colony that may utilise the marine IBA. Note, the lower population estimate represents the lowest estimated number of breeding pairs from a given colony contributing to the delineation of the marine IBA site. The lower population estimate may therefore be zero when only part of the individual colony(ies) density distribution surface contributed to the marine IBA. *The Count Year for the median population estimate indicates the number of yearly population assessments for the given colony. Colony names are given in the ‘Colony Codes’ table at the end of this document.

| Site code | Species | Colony | Count type | Lower | Upper | Count year* |
| --- | --- | --- | --- | --- | --- | --- |
| 56 | EMP | BEAR | min | 979 | 9457 | 2009 |
| 56 | EMP | BEAR | max | 979 | 9457 | 2009 |
| 56 | EMP | BEAR | median | 979 | 9457 | 1 |
| 56 | EMP | BEAR | recent | 979 | 9457 | 2009 |
| 56 | EMP | BSON | min | 0 | 1692 | 2009 |
| 56 | EMP | BSON | max | 0 | 1692 | 2009 |
| 56 | EMP | BSON | median | 0 | 1692 | 1 |
| 56 | EMP | BSON | recent | 0 | 1692 | 2009 |

# Antarctica marine IBA: 57

| Site code | 57 |
| --- | --- |
| Species | EMP |
| IBA criteria | A4: Congregations |
| Decimal Latitude | -73.971 |
| Decimal Longitude | -104.493 |
| Area (ha) | 352704.8 |
| Area (km2) | 3527.048 |
| MPA Overlap |  |
| MPA Type | NA |
| MPA Zones |  |

Figure A57.1: Focal Antarctica marine IBA 57 (orange polygon) for penguins, and other marine IBAs (light orange) for penguins identified during the project. Colonies circled in purple are those whose populations contributed to the marine IBA triggering IBA criteria A4 (>1% of the global population). See Table A57.2.

Table A57.1: Population estimates and count types (those that triggered IBA Criteria A4, >1% of global population) for key penguin species in Antarctic marine IBA 57. Key sources of colony input data associated with this marine IBA are detailed in Table A57.2. Population estimates refer to the lower and upper estimated number of adult breeding pairs likely to be using the marine IBA; derived from summing over all cells from individual colony density distribution surfaces which contributed to the identification of the marine IBA.

| Site code | Species | Count type | Lower | Upper |
| --- | --- | --- | --- | --- |
| 57 | EMP | min | 2567 | 5732 |
| 57 | EMP | max | 2567 | 5732 |
| 57 | EMP | median | 2567 | 5732 |
| 57 | EMP | recent | 2567 | 5732 |

Table A57.2: Population estimates (adult breeding pairs) and count types from individual colony(ies) density distribution surfaces which contributed to the identification of marine IBA: 57. I.e. The lower and upper estimated number of adult breeding pairs from a given colony that may utilise the marine IBA. Note, the lower population estimate represents the lowest estimated number of breeding pairs from a given colony contributing to the delineation of the marine IBA site. The lower population estimate may therefore be zero when only part of the individual colony(ies) density distribution surface contributed to the marine IBA. *The Count Year for the median population estimate indicates the number of yearly population assessments for the given colony. Colony names are given in the ‘Colony Codes’ table at the end of this document.

| Site code | Species | Colony | Count type | Lower | Upper | Count year* |
| --- | --- | --- | --- | --- | --- | --- |
| 57 | EMP | BSON | min | 2567 | 5732 | 2009 |
| 57 | EMP | BSON | max | 2567 | 5732 | 2009 |
| 57 | EMP | BSON | median | 2567 | 5732 | 1 |
| 57 | EMP | BSON | recent | 2567 | 5732 | 2009 |

# Antarctica marine IBA: 58

| Site code | 58 |
| --- | --- |
| Species | ADP,EMP |
| IBA criteria | A4: Congregations |
| Decimal Latitude | -73.666 |
| Decimal Longitude | -103.955 |
| Area (ha) | 51158.43 |
| Area (km2) | 511.5843 |
| MPA Overlap |  |
| MPA Type | NA |
| MPA Zones |  |

Figure A58.1: Focal Antarctica marine IBA 58 (orange polygon) for penguins, and other marine IBAs (light orange) for penguins identified during the project. Colonies circled in purple are those whose populations contributed to the marine IBA triggering IBA criteria A4 (>1% of the global population). See Table A58.2.

Table A58.1: Population estimates and count types (those that triggered IBA Criteria A4, >1% of global population) for key penguin species in Antarctic marine IBA 58. Key sources of colony input data associated with this marine IBA are detailed in Table A58.2. Population estimates refer to the lower and upper estimated number of adult breeding pairs likely to be using the marine IBA; derived from summing over all cells from individual colony density distribution surfaces which contributed to the identification of the marine IBA.

| Site code | Species | Count type | Lower | Upper |
| --- | --- | --- | --- | --- |
| 58 | ADP | min | 40807 | 92256 |
| 58 | ADP | max | 40807 | 92256 |
| 58 | ADP | median | 40807 | 92256 |
| 58 | ADP | recent | 40807 | 92256 |
| 58 | EMP | min | 2569 | 2988 |
| 58 | EMP | max | 2569 | 2988 |
| 58 | EMP | median | 2569 | 2988 |
| 58 | EMP | recent | 2569 | 2988 |

Table A58.2: Population estimates (adult breeding pairs) and count types from individual colony(ies) density distribution surfaces which contributed to the identification of marine IBA: 58. I.e. The lower and upper estimated number of adult breeding pairs from a given colony that may utilise the marine IBA. Note, the lower population estimate represents the lowest estimated number of breeding pairs from a given colony contributing to the delineation of the marine IBA site. The lower population estimate may therefore be zero when only part of the individual colony(ies) density distribution surface contributed to the marine IBA. *The Count Year for the median population estimate indicates the number of yearly population assessments for the given colony. Colony names are given in the ‘Colony Codes’ table at the end of this document.

| Site code | Species | Colony | Count type | Lower | Upper | Count year* |
| --- | --- | --- | --- | --- | --- | --- |
| 58 | ADP | BSON | min | 2222 | 4351 | 2011 |
| 58 | ADP | BSON | max | 2222 | 4351 | 2011 |
| 58 | ADP | BSON | median | 2222 | 4351 | 1 |
| 58 | ADP | BSON | recent | 2222 | 4351 | 2011 |
| 58 | ADP | CLAR | min | 62 | 109 | 2012 |
| 58 | ADP | CLAR | max | 62 | 109 | 2012 |
| 58 | ADP | CLAR | median | 62 | 109 | 1 |
| 58 | ADP | CLAR | recent | 62 | 109 | 2012 |
| 58 | ADP | EDWI | min | 10683 | 26881 | 2010 |
| 58 | ADP | EDWI | max | 10683 | 26881 | 2010 |
| 58 | ADP | EDWI | median | 10683 | 26881 | 1 |
| 58 | ADP | EDWI | recent | 10683 | 26881 | 2010 |
| 58 | ADP | LSAY | min | 26125 | 80704 | 2011 |
| 58 | ADP | LSAY | max | 26125 | 80704 | 2011 |
| 58 | ADP | LSAY | median | 26125 | 80704 | 1 |
| 58 | ADP | LSAY | recent | 26125 | 80704 | 2011 |
| 58 | EMP | BSON | min | 2569 | 2988 | 2009 |
| 58 | EMP | BSON | max | 2569 | 2988 | 2009 |
| 58 | EMP | BSON | median | 2569 | 2988 | 1 |
| 58 | EMP | BSON | recent | 2569 | 2988 | 2009 |

# Antarctica marine IBA: 59

| Site code | 59 |
| --- | --- |
| Species | ADP |
| IBA criteria | A4: Congregations |
| Decimal Latitude | -73.5 |
| Decimal Longitude | -103.597 |
| Area (ha) | 96494.22 |
| Area (km2) | 964.9422 |
| MPA Overlap |  |
| MPA Type | NA |
| MPA Zones |  |

Figure A59.1: Focal Antarctica marine IBA 59 (orange polygon) for penguins, and other marine IBAs (light orange) for penguins identified during the project. Colonies circled in purple are those whose populations contributed to the marine IBA triggering IBA criteria A4 (>1% of the global population). See Table A59.2.

Table A59.1: Population estimates and count types (those that triggered IBA Criteria A4, >1% of global population) for key penguin species in Antarctic marine IBA 59. Key sources of colony input data associated with this marine IBA are detailed in Table A59.2. Population estimates refer to the lower and upper estimated number of adult breeding pairs likely to be using the marine IBA; derived from summing over all cells from individual colony density distribution surfaces which contributed to the identification of the marine IBA.

| Site code | Species | Count type | Lower | Upper |
| --- | --- | --- | --- | --- |
| 59 | ADP | min | 37923 | 88800 |
| 59 | ADP | max | 37923 | 88800 |
| 59 | ADP | median | 37923 | 88800 |
| 59 | ADP | recent | 37923 | 88800 |

Table A59.2: Population estimates (adult breeding pairs) and count types from individual colony(ies) density distribution surfaces which contributed to the identification of marine IBA: 59. I.e. The lower and upper estimated number of adult breeding pairs from a given colony that may utilise the marine IBA. Note, the lower population estimate represents the lowest estimated number of breeding pairs from a given colony contributing to the delineation of the marine IBA site. The lower population estimate may therefore be zero when only part of the individual colony(ies) density distribution surface contributed to the marine IBA. *The Count Year for the median population estimate indicates the number of yearly population assessments for the given colony. Colony names are given in the ‘Colony Codes’ table at the end of this document.

| Site code | Species | Colony | Count type | Lower | Upper | Count year* |
| --- | --- | --- | --- | --- | --- | --- |
| 59 | ADP | BSON | min | 0 | 2217 | 2011 |
| 59 | ADP | BSON | max | 0 | 2217 | 2011 |
| 59 | ADP | BSON | median | 0 | 2217 | 1 |
| 59 | ADP | BSON | recent | 0 | 2217 | 2011 |
| 59 | ADP | CLAR | min | 0 | 52 | 2012 |
| 59 | ADP | CLAR | max | 0 | 52 | 2012 |
| 59 | ADP | CLAR | median | 0 | 52 | 1 |
| 59 | ADP | CLAR | recent | 0 | 52 | 2012 |
| 59 | ADP | EDWI | min | 7420 | 24589 | 2010 |
| 59 | ADP | EDWI | max | 7420 | 24589 | 2010 |
| 59 | ADP | EDWI | median | 7420 | 24589 | 1 |
| 59 | ADP | EDWI | recent | 7420 | 24589 | 2010 |
| 59 | ADP | LSAY | min | 26664 | 67713 | 2011 |
| 59 | ADP | LSAY | max | 26664 | 67713 | 2011 |
| 59 | ADP | LSAY | median | 26664 | 67713 | 1 |
| 59 | ADP | LSAY | recent | 26664 | 67713 | 2011 |

# Antarctica marine IBA: 60

| Site code | 60 |
| --- | --- |
| Species | ADP,EMP |
| IBA criteria | A4: Congregations |
| Decimal Latitude | -73.9 |
| Decimal Longitude | -103.306 |
| Area (ha) | 50993.34 |
| Area (km2) | 509.9334 |
| MPA Overlap |  |
| MPA Type | NA |
| MPA Zones |  |

Figure A60.1: Focal Antarctica marine IBA 60 (orange polygon) for penguins, and other marine IBAs (light orange) for penguins identified during the project. Colonies circled in purple are those whose populations contributed to the marine IBA triggering IBA criteria A4 (>1% of the global population). See Table A60.2.

Table A60.1: Population estimates and count types (those that triggered IBA Criteria A4, >1% of global population) for key penguin species in Antarctic marine IBA 60. Key sources of colony input data associated with this marine IBA are detailed in Table A60.2. Population estimates refer to the lower and upper estimated number of adult breeding pairs likely to be using the marine IBA; derived from summing over all cells from individual colony density distribution surfaces which contributed to the identification of the marine IBA.

| Site code | Species | Count type | Lower | Upper |
| --- | --- | --- | --- | --- |
| 60 | ADP | min | 37986 | 53180 |
| 60 | ADP | max | 37986 | 53180 |
| 60 | ADP | median | 37986 | 53180 |
| 60 | ADP | recent | 37986 | 53180 |
| 60 | EMP | min | 2923 | 4613 |
| 60 | EMP | max | 2923 | 4613 |
| 60 | EMP | median | 2923 | 4613 |
| 60 | EMP | recent | 2923 | 4613 |

Table A60.2: Population estimates (adult breeding pairs) and count types from individual colony(ies) density distribution surfaces which contributed to the identification of marine IBA: 60. I.e. The lower and upper estimated number of adult breeding pairs from a given colony that may utilise the marine IBA. Note, the lower population estimate represents the lowest estimated number of breeding pairs from a given colony contributing to the delineation of the marine IBA site. The lower population estimate may therefore be zero when only part of the individual colony(ies) density distribution surface contributed to the marine IBA. *The Count Year for the median population estimate indicates the number of yearly population assessments for the given colony. Colony names are given in the ‘Colony Codes’ table at the end of this document.

| Site code | Species | Colony | Count type | Lower | Upper | Count year* |
| --- | --- | --- | --- | --- | --- | --- |
| 60 | ADP | BACK | min | 16 | 111 | 2011 |
| 60 | ADP | BACK | max | 16 | 111 | 2011 |
| 60 | ADP | BACK | median | 16 | 111 | 1 |
| 60 | ADP | BACK | recent | 16 | 111 | 2011 |
| 60 | ADP | BSON | min | 3906 | 11852 | 2011 |
| 60 | ADP | BSON | max | 3906 | 11852 | 2011 |
| 60 | ADP | BSON | median | 3906 | 11852 | 1 |
| 60 | ADP | BSON | recent | 3906 | 11852 | 2011 |
| 60 | ADP | EDWI | min | 26791 | 47485 | 2010 |
| 60 | ADP | EDWI | max | 26791 | 47485 | 2010 |
| 60 | ADP | EDWI | median | 26791 | 47485 | 1 |
| 60 | ADP | EDWI | recent | 26791 | 47485 | 2010 |
| 60 | EMP | BSON | min | 2923 | 4613 | 2009 |
| 60 | EMP | BSON | max | 2923 | 4613 | 2009 |
| 60 | EMP | BSON | median | 2923 | 4613 | 1 |
| 60 | EMP | BSON | recent | 2923 | 4613 | 2009 |

# Antarctica marine IBA: 61

| Site code | 61 |
| --- | --- |
| Species | ADP |
| IBA criteria | A4: Congregations |
| Decimal Latitude | -73.913 |
| Decimal Longitude | -102.997 |
| Area (ha) | 6131.47 |
| Area (km2) | 61.3147 |
| MPA Overlap |  |
| MPA Type | NA |
| MPA Zones |  |

Figure A61.1: Focal Antarctica marine IBA 61 (orange polygon) for penguins, and other marine IBAs (light orange) for penguins identified during the project. Colonies circled in purple are those whose populations contributed to the marine IBA triggering IBA criteria A4 (>1% of the global population). See Table A61.2.

Table A61.1: Population estimates and count types (those that triggered IBA Criteria A4, >1% of global population) for key penguin species in Antarctic marine IBA 61. Key sources of colony input data associated with this marine IBA are detailed in Table A61.2. Population estimates refer to the lower and upper estimated number of adult breeding pairs likely to be using the marine IBA; derived from summing over all cells from individual colony density distribution surfaces which contributed to the identification of the marine IBA.

| Site code | Species | Count type | Lower | Upper |
| --- | --- | --- | --- | --- |
| 61 | ADP | min | 38126 | 58058 |
| 61 | ADP | max | 38126 | 58058 |
| 61 | ADP | median | 38126 | 58058 |
| 61 | ADP | recent | 38126 | 58058 |

Table A61.2: Population estimates (adult breeding pairs) and count types from individual colony(ies) density distribution surfaces which contributed to the identification of marine IBA: 61. I.e. The lower and upper estimated number of adult breeding pairs from a given colony that may utilise the marine IBA. Note, the lower population estimate represents the lowest estimated number of breeding pairs from a given colony contributing to the delineation of the marine IBA site. The lower population estimate may therefore be zero when only part of the individual colony(ies) density distribution surface contributed to the marine IBA. *The Count Year for the median population estimate indicates the number of yearly population assessments for the given colony. Colony names are given in the ‘Colony Codes’ table at the end of this document.

| Site code | Species | Colony | Count type | Lower | Upper | Count year* |
| --- | --- | --- | --- | --- | --- | --- |
| 61 | ADP | BACK | min | 97 | 98 | 2011 |
| 61 | ADP | BACK | max | 97 | 98 | 2011 |
| 61 | ADP | BACK | median | 97 | 98 | 1 |
| 61 | ADP | BACK | recent | 97 | 98 | 2011 |
| 61 | ADP | EDWI | min | 38028 | 58058 | 2010 |
| 61 | ADP | EDWI | max | 38028 | 58058 | 2010 |
| 61 | ADP | EDWI | median | 38028 | 58058 | 1 |
| 61 | ADP | EDWI | recent | 38028 | 58058 | 2010 |

# Antarctica marine IBA: 62

| Site code | 62 |
| --- | --- |
| Species | EMP |
| IBA criteria | A4: Congregations |
| Decimal Latitude | -71.722 |
| Decimal Longitude | -98.405 |
| Area (ha) | 25255.89 |
| Area (km2) | 252.5589 |
| MPA Overlap |  |
| MPA Type | NA |
| MPA Zones |  |

Figure A62.1: Focal Antarctica marine IBA 62 (orange polygon) for penguins, and other marine IBAs (light orange) for penguins identified during the project. Colonies circled in purple are those whose populations contributed to the marine IBA triggering IBA criteria A4 (>1% of the global population). See Table A62.2.

Table A62.1: Population estimates and count types (those that triggered IBA Criteria A4, >1% of global population) for key penguin species in Antarctic marine IBA 62. Key sources of colony input data associated with this marine IBA are detailed in Table A62.2. Population estimates refer to the lower and upper estimated number of adult breeding pairs likely to be using the marine IBA; derived from summing over all cells from individual colony density distribution surfaces which contributed to the identification of the marine IBA.

| Site code | Species | Count type | Lower | Upper |
| --- | --- | --- | --- | --- |
| 62 | EMP | min | 2571 | 3568 |
| 62 | EMP | max | 2571 | 3568 |
| 62 | EMP | median | 2571 | 3568 |
| 62 | EMP | recent | 2571 | 3568 |

Table A62.2: Population estimates (adult breeding pairs) and count types from individual colony(ies) density distribution surfaces which contributed to the identification of marine IBA: 62. I.e. The lower and upper estimated number of adult breeding pairs from a given colony that may utilise the marine IBA. Note, the lower population estimate represents the lowest estimated number of breeding pairs from a given colony contributing to the delineation of the marine IBA site. The lower population estimate may therefore be zero when only part of the individual colony(ies) density distribution surface contributed to the marine IBA. *The Count Year for the median population estimate indicates the number of yearly population assessments for the given colony. Colony names are given in the ‘Colony Codes’ table at the end of this document.

| Site code | Species | Colony | Count type | Lower | Upper | Count year* |
| --- | --- | --- | --- | --- | --- | --- |
| 62 | EMP | NOVI | min | 2571 | 3568 | 2009 |
| 62 | EMP | NOVI | max | 2571 | 3568 | 2009 |
| 62 | EMP | NOVI | median | 2571 | 3568 | 1 |
| 62 | EMP | NOVI | recent | 2571 | 3568 | 2009 |

# Antarctica marine IBA: 63

| Site code | 63 |
| --- | --- |
| Species | EMP |
| IBA criteria | A4: Congregations |
| Decimal Latitude | -72.086 |
| Decimal Longitude | -79.458 |
| Area (ha) | 449501 |
| Area (km2) | 4495.01 |
| MPA Overlap | D1MPA |
| MPA Type | Proposed |
| MPA Zones | GPZ-SWAP |

Figure A63.1: Focal Antarctica marine IBA 63 (orange polygon) for penguins, and other marine IBAs (light orange) for penguins identified during the project. Colonies circled in purple are those whose populations contributed to the marine IBA triggering IBA criteria A4 (>1% of the global population). See Table A63.2.

Table A63.1: Population estimates and count types (those that triggered IBA Criteria A4, >1% of global population) for key penguin species in Antarctic marine IBA 63. Key sources of colony input data associated with this marine IBA are detailed in Table A63.2. Population estimates refer to the lower and upper estimated number of adult breeding pairs likely to be using the marine IBA; derived from summing over all cells from individual colony density distribution surfaces which contributed to the identification of the marine IBA.

| Site code | Species | Count type | Lower | Upper |
| --- | --- | --- | --- | --- |
| 63 | EMP | min | 2566 | 6061 |
| 63 | EMP | max | 2566 | 6061 |
| 63 | EMP | median | 2566 | 6061 |
| 63 | EMP | recent | 2566 | 6061 |

Table A63.2: Population estimates (adult breeding pairs) and count types from individual colony(ies) density distribution surfaces which contributed to the identification of marine IBA: 63. I.e. The lower and upper estimated number of adult breeding pairs from a given colony that may utilise the marine IBA. Note, the lower population estimate represents the lowest estimated number of breeding pairs from a given colony contributing to the delineation of the marine IBA site. The lower population estimate may therefore be zero when only part of the individual colony(ies) density distribution surface contributed to the marine IBA. *The Count Year for the median population estimate indicates the number of yearly population assessments for the given colony. Colony names are given in the ‘Colony Codes’ table at the end of this document.

| Site code | Species | Colony | Count type | Lower | Upper | Count year* |
| --- | --- | --- | --- | --- | --- | --- |
| 63 | EMP | SMYL | min | 2566 | 6061 | 2009 |
| 63 | EMP | SMYL | max | 2566 | 6061 | 2009 |
| 63 | EMP | SMYL | median | 2566 | 6061 | 1 |
| 63 | EMP | SMYL | recent | 2566 | 6061 | 2009 |

# Colony Codes

| Species code | CCAMLR subarea | Site code | Site name | Longitude (EPSG: 4326) | Latitude (EPSG: 4326) | Years of data for mIBA assessment |
| --- | --- | --- | --- | --- | --- | --- |
| ADP | 48.1 | AMBU | Ambush Bay | -55.393 | -63.184 | 1 |
| ADP | 48.1 | ANCH | Anchorage Island | -68.2089 | -67.6042 | 2 |
| ADP | 48.1 | ANDI | Andresen Island Site 2 | -66.711 | -66.875 | 3 |
| ADP | 48.1 | ANDR | Andresen Island Site 1 | -66.649 | -66.879 | 3 |
| ADP | 48.1 | ARDL | Ardley Island | -58.933 | -62.213 | 20 |
| ADP | 48.1 | ARMS | Armstrong Reef | -66.2117 | -65.8919 | 2 |
| ADP | 48.1 | AVIA | Avian Island | -68.8855 | -67.7732 | 2 |
| ADP | 48.1 | BARC | Barcroft Islands | -67.1397 | -66.4575 | 2 |
| ADP | 48.1 | BEAG | Beagle Island | -54.6675 | -63.4139 | 2 |
| ADP | 48.1 | BERT | Berthelot Islands (excl. Green Island) | -64.112 | -65.333 | 4 |
| ADP | 48.1 | BISC | Biscoe Point | -63.7775 | -64.8114 | 11 |
| ADP | 48.1 | BONG | Bongrain Point (Pourquoi Pas Island) | -67.7319 | -67.7233 | 4 |
| ADP | 48.1 | BOWL | Cape Bowles | -54.091 | -61.316 | 2 |
| ADP | 48.1 | BRAS | Brash Island | -54.9142 | -63.3864 | 2 |
| ADP | 48.1 | BROW | Brown Bluff | -56.905 | -63.5222 | 2 |
| ADP | 48.1 | CHAT | Chatos Island | -69.152 | -67.66 | 2 |
| ADP | 48.1 | CHIS | Christine Island | -64.0236 | -64.7946 | 5 |
| ADP | 48.1 | COCK | Cockburn Island | -56.8412 | -64.2005 | 1 |
| ADP | 48.1 | CONE | Cone Island | -69.1531 | -67.6749 | 2 |
| ADP | 48.1 | CORM | Cormorant Island | -63.9667 | -64.7939 | 7 |
| ADP | 48.1 | DARB | Darbel Island | -65.9003 | -66.3808 | 2 |
| ADP | 48.1 | DARW | Darwin Island | -54.726 | -63.437 | 2 |
| ADP | 48.1 | DARX | Darboux Island | -64.215 | -65.4028 | 1 |
| ADP | 48.1 | DEEI | Dee Island | -59.7836 | -62.4229 | 1 |
| ADP | 48.1 | DESC | Descazes Island | -67.3334 | -67.3334 | 1 |
| ADP | 48.1 | DETA | Detaille Island | -66.7867 | -66.8708 | 4 |
| ADP | 48.1 | DEVI | Devil Island | -57.2889 | -63.7992 | 2 |
| ADP | 48.1 | DREA | Dream Island | -64.2256 | -64.7254 | 3 |
| ADP | 48.1 | DURO | Duroch Islands | -57.8903 | -63.3033 | 1 |
| ADP | 48.1 | DURV | d'Urville Monument | -56.2944 | -63.4267 | 3 |
| ADP | 48.1 | DUTH | Duthoit Point | -58.835 | -62.307 | 1 |
| ADP | 48.1 | EARL | Earle Island | -54.7833 | -63.4833 | 2 |
| ADP | 48.1 | EDEN | Eden Rocks | -55.7018 | -63.4946 | 2 |
| ADP | 48.1 | EMPE | Emperor Island | -68.71 | -67.8647 | 1 |
| ADP | 48.1 | ETNA | Etna Island | -55.179 | -63.0948 | 1 |
| ADP | 48.1 | EVEN | Cape Evensen (mainland) | -65.683 | -66.164 | 3 |
| ADP | 48.1 | EVER | Cape Evensen (offshore rocks) | -65.7205 | -66.1579 | 1 |
| ADP | 48.1 | FISH | Fish Islands | -65.3611 | -66.0275 | 4 |
| ADP | 48.1 | FIZK | Fizkin Island (islet northeast of Fizkin Island) | -65.48 | -65.514 | 2 |
| ADP | 48.1 | FLIE | Fliess Bay | -55.2412 | -63.2045 | 1 |
| ADP | 48.1 | GERL | Gerlache Island | -64.214 | -64.601 | 1 |
| ADP | 48.1 | GING | Ginger Island | -68.6858 | -67.7494 | 1 |
| ADP | 48.1 | GOUR | Gourdin Island | -57.3074 | -63.1969 | 2 |
| ADP | 48.1 | GREI | Green Island | -64.1487 | -65.3236 | 1 |
| ADP | 48.1 | HANN | Hannah Point | -60.6134 | -62.6545 | 2 |
| ADP | 48.1 | HERO | Heroina Island | -54.6083 | -63.3944 | 2 |
| ADP | 48.1 | HOLD | Holdfast Point (mainland and offshore rocks) | -66.5867 | -66.7917 | 2 |
| ADP | 48.1 | HOPE | Hope Bay | -56.9978 | -63.3972 | 4 |
| ADP | 48.1 | HUMB | Humble Island | -64.0875 | -64.7647 | 7 |
| ADP | 48.1 | JING | Jingle Island | -65.3253 | -65.4303 | 1 |
| ADP | 48.1 | JOUB | Joubin Islands | -64.3992 | -64.7744 | 3 |
| ADP | 48.1 | KING | King Point | -55.481 | -63.16 | 1 |
| ADP | 48.1 | KNOB | Knobble Head, Bransfield Island | -56.5694 | -63.1619 | 1 |
| ADP | 48.1 | KUNO | Kuno Point | -67.1603 | -66.3978 | 1 |
| ADP | 48.1 | LAGO | Lagotellerie Island | -67.4017 | -67.8869 | 2 |
| ADP | 48.1 | LAKT | Islet next to Laktionov Island | -65.7897 | -65.7585 | 1 |
| ADP | 48.1 | LAVO | Islet 1 km west of Lavosier Island | -66.829 | -66.122 | 2 |
| ADP | 48.1 | LION | Lions Rump | -58.1229 | -62.1331 | 8 |
| ADP | 48.1 | LITC | Litchfield Island | -64.0919 | -64.7708 | 27 |
| ADP | 48.1 | LLAN | Llano Point | -58.446 | -62.176 | 29 |
| ADP | 48.1 | MADD | Madder Cliff (Joinville Island) | -56.4831 | -63.2989 | 1 |
| ADP | 48.1 | MADI | Madder Cliff Island | -56.499 | -63.306 | 2 |
| ADP | 48.1 | NCAP | North Cape (d'Urville Island) | -56.489 | -62.974 | 1 |
| ADP | 48.1 | NESM | Northeast of Smiggers Island | -65.3465 | -65.4516 | 1 |
| ADP | 48.1 | PATE | Patella Island | -55.5238 | -63.1294 | 1 |
| ADP | 48.1 | PAUL | Paulet Island | -55.7881 | -63.5801 | 4 |
| ADP | 48.1 | PCHA | Port Charcot | -64.026 | -65.067 | 14 |
| ADP | 48.1 | PEIN | Peine Island (Comb Island) | -54.717 | -63.411 | 2 |
| ADP | 48.1 | PENG | Penguin Island | -57.9269 | -62.102 | 8 |
| ADP | 48.1 | PEPO | Penguin Point (Seymour Island) | -56.7114 | -64.3061 | 3 |
| ADP | 48.1 | PETE | Petermann Island | -64.137 | -65.176 | 20 |
| ADP | 48.1 | PLAT | Plato Island (Platter Island) | -54.6742 | -63.433 | 2 |
| ADP | 48.1 | PLEN | Pleneau Island | -64.0556 | -65.104 | 1 |
| ADP | 48.1 | PPPT | Pink Pool Point | -54.079 | -61.309 | 1 |
| ADP | 48.1 | PTHO | Point Thomas | -58.4615 | -62.1631 | 14 |
| ADP | 48.1 | REDI | Red Island | -57.88 | -63.7356 | 1 |
| ADP | 48.1 | RHYO | Rhyolite Island | -68.5709 | -69.6488 | 2 |
| ADP | 48.1 | RRRI | Red Rock Ridge | -67.1686 | -68.2878 | 1 |
| ADP | 48.1 | SAXU | Saxum Nunatak | -56.0533 | -63.1367 | 1 |
| ADP | 48.1 | SHEN | Sheppard Nunatak | -57.0154 | -63.3629 | 1 |
| ADP | 48.1 | SHEP | Sheppard Point | -56.9844 | -63.3707 | 1 |
| ADP | 48.1 | SMIG | Smiggers Island | -65.3514 | -65.4597 | 1 |
| ADP | 48.1 | SOMI | South of Martin Islands | -65.3381 | -65.6881 | 2 |
| ADP | 48.1 | STRA | Stranger Point | -58.6161 | -62.26 | 8 |
| ADP | 48.1 | TAYH | Tay Head (Joinville Island) | -55.5508 | -63.3486 | 3 |
| ADP | 48.1 | TORG | Torgersen Island | -64.0741 | -64.7731 | 5 |
| ADP | 48.1 | TRUN | Trundle Island | -65.2885 | -65.3938 | 1 |
| ADP | 48.1 | TSIS | Three Sisters | -57.9135 | -62.0779 | 3 |
| ADP | 48.1 | TURR | Turret Point (King George Island) | -57.9514 | -62.0875 | 5 |
| ADP | 48.1 | VIEU | Vieugue Island | -65.2144 | -65.6682 | 2 |
| ADP | 48.1 | VORT | Vortex Island | -57.6415 | -63.7257 | 2 |
| ADP | 48.1 | WELL | Weller Island | -65.3817 | -65.4453 | 1 |
| ADP | 48.1 | WIDE | Wideopen Islands | -55.8492 | -63.0042 | 1 |
| ADP | 48.1 | WINK | Winkle Island (two islets next to Winkle Island) | -65.686 | -65.52 | 1 |
| ADP | 48.1 | YALO | Yalour Islands | -64.1564 | -65.2389 | 8 |
| ADP | 48.2 | ACUN | Acuna Island | -44.637 | -60.7612 | 4 |
| ADP | 48.2 | AMPH | Amphibolite Point | -45.339 | -60.684 | 2 |
| ADP | 48.2 | CHRI | Christoffersen Island | -45.035 | -60.728 | 1 |
| ADP | 48.2 | CORP | Cormorant Point | -44.732 | -60.756 | 2 |
| ADP | 48.2 | FERR | Ferrier Peninsula | -44.425 | -60.715 | 3 |
| ADP | 48.2 | FITC | Fitchie Bay | -44.494 | -60.714 | 3 |
| ADP | 48.2 | GERD | Gerd Island | -45.7437 | -60.6574 | 1 |
| ADP | 48.2 | GOPT | Gourlay Point | -45.5863 | -60.7309 | 2 |
| ADP | 48.2 | GOSL | Gosling Islands | -45.9178 | -60.6406 | 1 |
| ADP | 48.2 | GRAP | Graptolite Island | -44.4621 | -60.7159 | 3 |
| ADP | 48.2 | HANS | Cape Hansen, Coronation Island | -45.584 | -60.659 | 2 |
| ADP | 48.2 | MART | Point Martin | -44.7185 | -60.7709 | 3 |
| ADP | 48.2 | NOPT | North Point | -45.626 | -60.672 | 3 |
| ADP | 48.2 | OUTE | Outer Island | -45.5806 | -60.7069 | 1 |
| ADP | 48.2 | PAGE | Pageant Point | -45.5843 | -60.7286 | 2 |
| ADP | 48.2 | PANT | Pantomime Point | -45.5833 | -60.7266 | 2 |
| ADP | 48.2 | POWE | Powell Island | -45.029 | -60.725 | 1 |
| ADP | 48.2 | SHIN | Shingle Cove (Coronation Island) | -45.5636 | -60.6469 | 2 |
| ADP | 48.2 | SPRO | Spindrift Rocks | -45.644 | -60.683 | 3 |
| ADP | 48.2 | STEN | Stene Point | -45.707 | -60.654 | 2 |
| ADP | 48.2 | WEDD | Weddell Island | -44.8479 | -60.6359 | 1 |
| ADP | 48.2 | WPEC | Watson Peninsula (east coast) | -44.5436 | -60.6761 | 5 |
| ADP | 88.1 | ADAR | Cape Adare | 170.1999 | -71.3063 | 8 |
| ADP | 88.1 | ANNE | Cape Anne | 169.85 | -73.617 | 9 |
| ADP | 88.1 | ARTH | Arthurson Ridge | 158.5109 | -69.3634 | 1 |
| ADP | 88.1 | BEAN | Beaufort Island North | 166.881 | -76.9288 | 5 |
| ADP | 88.1 | BEAU | Beaufort Island | 166.8978 | -76.9694 | 19 |
| ADP | 88.1 | BRDM | Cape Bird Middle | 166.4187 | -77.2304 | 30 |
| ADP | 88.1 | BRDN | Cape Bird North | 166.4459 | -77.2145 | 31 |
| ADP | 88.1 | BRDS | Cape Bird South | 166.3794 | -77.2594 | 31 |
| ADP | 88.1 | BUCK | Buckle Island | 163.2871 | -66.8908 | 2 |
| ADP | 88.1 | CBAR | Cape Barne | 166.2416 | -77.578 | 3 |
| ADP | 88.1 | CDAV | Cape Davis | 163.5333 | -66.65 | 2 |
| ADP | 88.1 | CHAL | Cape Hallett | 170.2142 | -72.3179 | 17 |
| ADP | 88.1 | CHII | Chinstrap Islet | 163.311 | -66.925 | 2 |
| ADP | 88.1 | CMID | Coulman Middle | 169.8854 | -73.4372 | 14 |
| ADP | 88.1 | CNOR | Coulman North | 169.8401 | -73.3822 | 11 |
| ADP | 88.1 | CONI | Conical Island (Aviation Islands) | 158.7833 | -69.2667 | 1 |
| ADP | 88.1 | CORN | Cape Cornish (NE Buckle) | 163.2139 | -66.7031 | 2 |
| ADP | 88.1 | COTT | Cape Cotter | 170.3122 | -72.4045 | 10 |
| ADP | 88.1 | CROZ | Cape Crozier | 169.32 | -77.46 | 28 |
| ADP | 88.1 | CSOU | Coulman South | 169.8779 | -73.5137 | 11 |
| ADP | 88.1 | DOME | Dome Island (Aviation Islands) | 158.7833 | -69.2667 | 1 |
| ADP | 88.1 | DOWN | Downshire Cliffs | 170.592 | -71.5582 | 10 |
| ADP | 88.1 | DUKE | Duke of York Island | 170.0635 | -71.6235 | 7 |
| ADP | 88.1 | EDMO | Edmonson Point | 165.0666 | -74.3167 | 11 |
| ADP | 88.1 | FBER | Fortenberry | 167.0789 | -70.7662 | 1 |
| ADP | 88.1 | FRAE | Franklin Island East | 168.4101 | -76.1581 | 12 |
| ADP | 88.1 | FRAW | Franklin Island West | 168.3383 | -76.1618 | 10 |
| ADP | 88.1 | HBAY | Harald Bay | 157.6894 | -69.1977 | 1 |
| ADP | 88.1 | INEX | Inexpressible Island | 163.7287 | -74.9009 | 14 |
| ADP | 88.1 | JONE | Cape Jones | 169.2272 | -73.2762 | 9 |
| ADP | 88.1 | MAND | Mandible Cirque | 169.25 | -73.117 | 7 |
| ADP | 88.1 | NELL | Nella/Thalla Islands | 166.0873 | -70.6136 | 2 |
| ADP | 88.1 | NORF | Northern Foothills (Terra Nova Bay) | 164 | -74.75 | 14 |
| ADP | 88.1 | PHIL | Cape Phillips | 169.6168 | -73.0714 | 8 |
| ADP | 88.1 | POSS | Possession Island | 171.1692 | -71.8946 | 5 |
| ADP | 88.1 | ROYD | Cape Royds | 166.1639 | -77.5545 | 32 |
| ADP | 88.1 | SABR | Sabrina Island | 163.309 | -66.9171 | 3 |
| ADP | 88.1 | SENT | Sentry Rocks | 167.4046 | -70.7543 | 2 |
| ADP | 88.1 | SEPR | SE Promontory | 163.05 | -66.65 | 2 |
| ADP | 88.1 | STUR | Sturge Island | 164.633 | -67.467 | 1 |
| ADP | 88.1 | SVEN | Sven Foyn Island | 171.0695 | -71.956 | 11 |
| ADP | 88.1 | SWIS | Southwest Island (Aviation Islands) | 158.7833 | -69.2666 | 1 |
| ADP | 88.1 | UNGE | Unger Island (Unger Rock) | 166.919 | -70.6811 | 3 |
| ADP | 88.1 | WHEA | Cape Wheatstone | 170.2024 | -72.6217 | 12 |
| ADP | 88.1 | WOOD | Wood Bay | 165.1332 | -74.3299 | 8 |
| ADP | 88.2 | BURK | Cape Burks | -136.83 | -74.7505 | 2 |
| ADP | 88.2 | CLAR | Clark Island | -105.193 | -74.056 | 1 |
| ADP | 88.2 | CRUZ | Cruzen Island | -140.327 | -74.7341 | 1 |
| ADP | 88.2 | LAUF | Lauff Island | -126.775 | -73.2325 | 2 |
| ADP | 88.2 | LOVI | Lovill Bluff | -127.436 | -73.538 | 2 |
| ADP | 88.2 | MAHE | Maher Island | -127.05 | -73.1983 | 2 |
| ADP | 88.2 | SHEI | Shepard Island | -132.552 | -74.3773 | 1 |
| ADP | 88.2 | WOPT | Worley Point | -132.777 | -74.4057 | 1 |
| ADP | 88.3 | BACK | Backer Islands | -102.552 | -74.4112 | 1 |
| ADP | 88.3 | BSON | Brownson Islands | -103.636 | -74.1681 | 1 |
| ADP | 88.3 | CHAR | Charcot Island | -75.4074 | -69.7617 | 1 |
| ADP | 88.3 | EDWI | Edwards Islands | -103.006 | -73.8701 | 1 |
| ADP | 88.3 | LSAY | Lindsay Islands | -103.183 | -73.6094 | 1 |
| ADP | 88.3 | PIIS | Peter I Island | -90.4917 | -68.835 | 1 |
| ADP | 88.3 | SIMS | Sims Island | -78.5407 | -73.2725 | 1 |
| ADP | 88.3 | WAIT | Cape Waites | -103.451 | -72.713 | 1 |
| ADP | 58.4.1 | ADAM | Adams Island | 92.5486 | -66.5459 | 2 |
| ADP | 58.4.1 | BALA | Balaena Islands | 111.0688 | -66.0158 | 1 |
| ADP | 58.4.1 | BERK | Berkley/Cameron | 110.64 | -66.2163 | 3 |
| ADP | 58.4.1 | BIEN | Cape Bienvenue | 140.5252 | -66.7203 | 3 |
| ADP | 58.4.1 | CHAP | Chappel Island | 110.4193 | -66.1772 | 3 |
| ADP | 58.4.1 | CHIC | Chick Islands | 120.9934 | -66.7918 | 1 |
| ADP | 58.4.1 | CHUN | Cape Hunter | 142.349 | -66.963 | 2 |
| ADP | 58.4.1 | CURZ | Curzon Islands | 141.5669 | -66.767 | 2 |
| ADP | 58.4.1 | DAVI | Davis Island | 108.4444 | -66.6637 | 2 |
| ADP | 58.4.1 | DENI | Cape Denison | 142.6647 | -67.0072 | 1 |
| ADP | 58.4.1 | FRAM | Fram Islands | 139.825 | -66.637 | 2 |
| ADP | 58.4.1 | HASW | Haswell Island | 93.01 | -66.52 | 1 |
| ADP | 58.4.1 | HENR | Henry Islands | 120.6206 | -66.8781 | 2 |
| ADP | 58.4.1 | HOLL | Holl/O'Connor | 110.4315 | -66.4118 | 2 |
| ADP | 58.4.1 | IFOI | Ifo Island Area | 139.728 | -66.627 | 1 |
| ADP | 58.4.1 | IVAN | Ivanhoff Head | 109.1276 | -66.8803 | 1 |
| ADP | 58.4.1 | JANE | Janet Rock | 139.1651 | -66.5698 | 1 |
| ADP | 58.4.1 | JULE | Cape Jules | 140.9189 | -66.7438 | 2 |
| ADP | 58.4.1 | LEWI | Lewis Island | 134.3849 | -66.1051 | 2 |
| ADP | 58.4.1 | MACK | MacKellar Islands | 142.65 | -66.967 | 1 |
| ADP | 58.4.1 | MALL | Mallory Point | 108.6433 | -66.83 | 2 |
| ADP | 58.4.1 | MERR | Merritt Island | 107.1565 | -66.4588 | 2 |
| ADP | 58.4.1 | MIDG | Hollin/Midgley | 110.4036 | -66.3259 | 3 |
| ADP | 58.4.1 | NEIS | Nelly Island | 110.1782 | -66.2294 | 3 |
| ADP | 58.4.1 | NUTT | Cape Nutt | 108.2127 | -66.6352 | 2 |
| ADP | 58.4.1 | ODBE | Odbert Island | 110.5421 | -66.3742 | 2 |
| ADP | 58.4.1 | PGEO | Point Geologie | 140.01 | -66.67 | 2 |
| ADP | 58.4.1 | PIGE | Cape Pigeon Rocks | 143.894 | -66.9334 | 1 |
| ADP | 58.4.1 | PISL | Peterson Island | 110.4993 | -66.4665 | 3 |
| ADP | 58.4.1 | PMAR | Port Martin | 141.3997 | -66.8113 | 2 |
| ADP | 58.4.1 | SEFB | SE Fisher Bay | 146.0809 | -67.5949 | 1 |
| ADP | 58.4.1 | SHLY | Shirley/Beall | 110.5 | -66.283 | 2 |
| ADP | 58.4.1 | WATT | Watt Bay | 144.2854 | -66.9949 | 1 |
| ADP | 58.4.1 | WAYA | Way Archipelago | 143.5895 | -66.8571 | 1 |
| ADP | 58.4.1 | WHTY | Blakeney/Whitney | 110.5573 | -66.2457 | 3 |
| ADP | 58.4.2 | AKAR | Akarui Point | 41.3901 | -68.4999 | 3 |
| ADP | 58.4.2 | ALAS | Alasheyev Bight | 46.109 | -67.654 | 1 |
| ADP | 58.4.2 | ANDS | Andersen Island | 63.3572 | -67.4353 | 1 |
| ADP | 58.4.2 | AUST | Auster Islands | 63.98 | -67.39 | 1 |
| ADP | 58.4.2 | BATT | Cape Batterbee | 53.8129 | -65.842 | 1 |
| ADP | 58.4.2 | BECH | Bechervaise Island | 62.8167 | -67.5833 | 12 |
| ADP | 58.4.2 | BENT | Benten | 39.25 | -69.0417 | 16 |
| ADP | 58.4.2 | BOLI | Bolingen/Lichen Island | 75.7474 | -69.456 | 1 |
| ADP | 58.4.2 | BRAT | Brattstrand Bluff | 76.9995 | -69.2157 | 1 |
| ADP | 58.4.2 | CBAY | Casey Bay | 48.6565 | -67.3774 | 1 |
| ADP | 58.4.2 | CHI1 | Child Rocks Islands 1 | 63.2749 | -67.4377 | 1 |
| ADP | 58.4.2 | CHI2 | Child Rocks Islands 2 | 63.2824 | -67.438 | 1 |
| ADP | 58.4.2 | CHI3 | Child Rocks Islands 3 | 63.2715 | -67.4387 | 1 |
| ADP | 58.4.2 | COLB | Colbeck Archipelago Unnamed 1 | 61.0647 | -67.3436 | 1 |
| ADP | 58.4.2 | DOU1 | Douglas Islands 1 | 63.3893 | -67.3803 | 1 |
| ADP | 58.4.2 | DOU2 | Douglas Islands 2 | 63.3895 | -67.3849 | 1 |
| ADP | 58.4.2 | FORB | Forbes Glacier | 62.2858 | -67.5964 | 2 |
| ADP | 58.4.2 | GNEY | Gibbney Island | 62.3205 | -67.5543 | 1 |
| ADP | 58.4.2 | HINO | Cape Hinode | 42.6612 | -68.1453 | 3 |
| ADP | 58.4.2 | HOKU | Hokuro Cove | 39.629 | -69.213 | 21 |
| ADP | 58.4.2 | KIDS | Kidson Island | 61.187 | -67.2144 | 2 |
| ADP | 58.4.2 | KIRB | Kirby Head | 46.5372 | -67.2726 | 1 |
| ADP | 58.4.2 | KIRT | Kirton/Macklin | 63.6378 | -67.4907 | 1 |
| ADP | 58.4.2 | KUZI | Kuzira Point | 38.2667 | -69.6 | 3 |
| ADP | 58.4.2 | LONG | Long Peninsula Island | 78.324 | -68.4163 | 2 |
| ADP | 58.4.2 | LOWT | Low Tongue | 61.9906 | -67.5456 | 1 |
| ADP | 58.4.2 | MAME | Mame-zima | 39.4833 | -69.0167 | 25 |
| ADP | 58.4.2 | MAWS | Mawson Coast (excl. Bechervaise Island) | 62.9406 | -67.5563 | 1 |
| ADP | 58.4.2 | MBIS | Mount Biscoe | 51.3275 | -66.2209 | 2 |
| ADP | 58.4.2 | MCDO | McDonald Point | 59.6654 | -67.3427 | 1 |
| ADP | 58.4.2 | MEHO | Meholmen Island | 39.4788 | -69.0254 | 2 |
| ADP | 58.4.2 | MGLE | Mount Gleadell | 50.44 | -66.941 | 1 |
| ADP | 58.4.2 | MIZU | Mizukuguri Cove | 39.614 | -69.197 | 22 |
| ADP | 58.4.2 | MRII | Mount Riiser-Larsen | 50.5511 | -66.7908 | 2 |
| ADP | 58.4.2 | MYAL | Myall/McMahon | 45.7356 | -67.6721 | 1 |
| ADP | 58.4.2 | NOKK | Nokkelholmane Islands | 39.4635 | -69.3811 | 14 |
| ADP | 58.4.2 | OLDH | Oldham Island | 61.7253 | -67.5208 | 1 |
| ADP | 58.4.2 | OMGA | Cape Omega | 40.9833 | -68.5667 | 3 |
| ADP | 58.4.2 | ONGU | Ongulkaven | 39.4252 | -69.0171 | 25 |
| ADP | 58.4.2 | PROC | Proclamation Island | 53.6876 | -65.8424 | 1 |
| ADP | 58.4.2 | RAUE | Rauer Islands | 77.6765 | -68.8331 | 2 |
| ADP | 58.4.2 | RBSN | Robinson | 63.4596 | -67.4543 | 2 |
| ADP | 58.4.2 | RONW | Robinson (northwest) | 63.413 | -67.4489 | 1 |
| ADP | 58.4.2 | ROOK | Rookery Islands | 62.5099 | -67.6044 | 2 |
| ADP | 58.4.2 | ROSE | Robinson (southeast) | 63.4956 | -67.4749 | 2 |
| ADP | 58.4.2 | RUMP | Rumpa Island | 39.3905 | -69.1441 | 25 |
| ADP | 58.4.2 | SCUL | Scullin/Murray | 66.6968 | -67.7833 | 1 |
| ADP | 58.4.2 | SHEE | Sheelagh Islands | 50.1804 | -66.5464 | 1 |
| ADP | 58.4.2 | SIGA | Sigaren | 39.4344 | -69.1693 | 4 |
| ADP | 58.4.2 | STAN | Stanton Continental Rock | 61.7175 | -67.5342 | 1 |
| ADP | 58.4.2 | STEI | Steines Island | 76.5825 | -69.3412 | 2 |
| ADP | 58.4.2 | STUN | Stanton unnamed | 61.5978 | -67.5078 | 1 |
| ADP | 58.4.2 | SVIS | Svenner Islands | 76.8346 | -69.0341 | 1 |
| ADP | 58.4.2 | TENM | Tenmondai Rock | 41.701 | -68.4445 | 2 |
| ADP | 58.4.2 | THOR | Thorgaut | 63.5433 | -67.4425 | 2 |
| ADP | 58.4.2 | TORI | Torinosu Cove | 39.5667 | -69.4833 | 17 |
| ADP | 58.4.2 | TRYN | Tryne Islands | 78.4125 | -68.3809 | 1 |
| ADP | 58.4.2 | UFSI | Ufs Island | 61.1406 | -67.4694 | 2 |
| ADP | 58.4.2 | UIP2 | Unnnamed Island PE 2 | 77.736 | -68.9012 | 1 |
| ADP | 58.4.2 | UIP3 | Unnnamed Island PE 3 | 78.211 | -68.4419 | 1 |
| ADP | 58.4.2 | UIPN | Unnamed Island PE 2 North | 77.7162 | -68.9013 | 1 |
| ADP | 58.4.2 | UNN2 | Unnamed 2 | 63.5435 | -67.4402 | 1 |
| ADP | 58.4.2 | UNN7 | Unnamed 7 | 63.3336 | -67.4475 | 1 |
| ADP | 58.4.2 | VESN | Vestfold North | 78.0954 | -68.4842 | 2 |
| ADP | 58.4.2 | VESS | Vestfold South | 77.9227 | -68.5883 | 2 |
| ADP | 58.4.2 | WYAT | Wyatt Earp Islands | 78.5385 | -68.3569 | 1 |
| ADP | 58.4.2 | YTRE | Ytrehovdeholmen | 39.4333 | -69.2167 | 17 |
| CHP | 48.1 | AITC | Barrientos Island (Aitcho Islands) | -59.7517 | -62.4071 | 4 |
| CHP | 48.1 | ALCO | Alcock Island | -61.127 | -64.24 | 4 |
| CHP | 48.1 | ARDL | Ardley Island | -58.933 | -62.213 | 19 |
| CHP | 48.1 | ARMS | Armstrong Reef | -66.2117 | -65.8919 | 3 |
| CHP | 48.1 | ASPL | Aspland Island | -55.894 | -61.468 | 1 |
| CHP | 48.1 | ASTR | Astrolabe Island | -58.683 | -63.316 | 1 |
| CHP | 48.1 | BACH | Bach Quartet | -58.028 | -61.921 | 1 |
| CHP | 48.1 | BAIL | Baily Head (Deception Is) | -60.506 | -62.965 | 4 |
| CHP | 48.1 | BAIS | Bath Island | -59.789 | -62.381 | 1 |
| CHP | 48.1 | BARN | Barnard Pt (Livingston Is) | -60.338 | -62.758 | 1 |
| CHP | 48.1 | BART | Barton Peninsula | -58.791 | -62.224 | 16 |
| CHP | 48.1 | BEAV | Beaver Rocks | -59.362 | -63.679 | 1 |
| CHP | 48.1 | BELI | Guesalaga Island | -61.9976 | -64.2782 | 1 |
| CHP | 48.1 | BELL | Bell Point | -58.889 | -62.119 | 1 |
| CHP | 48.1 | BELS | Cape Belsham | -54.883 | -61.096 | 1 |
| CHP | 48.1 | BLAK | Blake Island | -59.0303 | -63.649 | 2 |
| CHP | 48.1 | BOWL | Cape Bowles | -54.091 | -61.316 | 1 |
| CHP | 48.1 | BOYE | Boyer Rocks | -59.0371 | -63.583 | 2 |
| CHP | 48.1 | BPTS | Byewater Point (South) | -61.5263 | -62.7747 | 1 |
| CHP | 48.1 | BRIM | Brimstone Peak | -57.7525 | -61.9124 | 2 |
| CHP | 48.1 | BRIT | Britannia's Figleaf | -55.213 | -61.278 | 2 |
| CHP | 48.1 | BRPW | Brimstone Peak (West) | -57.7633 | -61.9183 | 2 |
| CHP | 48.1 | BUSK | Buskin Rocks | -55.149 | -61.057 | 1 |
| CHP | 48.1 | BYEW | Byewater Point | -61.5021 | -62.7528 | 1 |
| CHP | 48.1 | CARO | Caroline Bluff | -57.659 | -61.911 | 1 |
| CHP | 48.1 | CAST | Castle Rock | -61.5814 | -62.7886 | 1 |
| CHP | 48.1 | CASY | Casy Island | -57.5052 | -63.2365 | 1 |
| CHP | 48.1 | CCMP | Chinstrap Camp | -54.756 | -61.156 | 1 |
| CHP | 48.1 | CCOE | Cape Conway (East) | -61.424 | -62.838 | 1 |
| CHP | 48.1 | CHAB | Chabrier Rock - Vaureal Peak | -58.2961 | -62.1874 | 3 |
| CHP | 48.1 | CHIN | Chinstrap Cove | -54.197 | -61.245 | 1 |
| CHP | 48.1 | CHNE | Cape Herschel (North-East) | -60.986 | -64.042 | 1 |
| CHP | 48.1 | CHPT | Charles Point | -61 | -64.236 | 5 |
| CHP | 48.1 | CHSE | Cape Herschel (South-East) | -61.033 | -64.078 | 3 |
| CHP | 48.1 | CIPT | Cieslak Point | -58.655 | -62.009 | 1 |
| CHP | 48.1 | CLIN | Cape Lindsey | -55.48 | -61.107 | 1 |
| CHP | 48.1 | CLPT | Claude Point | -62.6177 | -64.116 | 1 |
| CHP | 48.1 | CMEL | Cape Melville | -57.58 | -62.022 | 2 |
| CHP | 48.1 | COBA | Cobalescou Island | -61.6499 | -64.1795 | 3 |
| CHP | 48.1 | CONE | Cone Island | -69.1531 | -67.6749 | 2 |
| CHP | 48.1 | CPTW | Cieslak Point (West) | -58.689 | -62.012 | 1 |
| CHP | 48.1 | CRAB | Crab Beach | -55.17 | -61.246 | 1 |
| CHP | 48.1 | CRAG | Near Craggy Point | -54.186 | -61.302 | 1 |
| CHP | 48.1 | CRBA | Cresta Run Bay | -55.359 | -61.236 | 1 |
| CHP | 48.1 | CRIS | Cricklewood Island | -59.774 | -62.385 | 1 |
| CHP | 48.1 | CRWL | Cornwallis Island | -54.4641 | -61.0724 | 1 |
| CHP | 48.1 | DAVE | Davey Point | -58.5302 | -61.9689 | 2 |
| CHP | 48.1 | DECI | Decimal Point | -54.702 | -61.097 | 1 |
| CHP | 48.1 | DELA | Delaite Island | -62.1881 | -64.5643 | 3 |
| CHP | 48.1 | DEMA | Demay Point | -58.4191 | -62.2137 | 10 |
| CHP | 48.1 | DEPT | Devils Point | -61.1829 | -62.6714 | 1 |
| CHP | 48.1 | DESO | Desolation Island | -60.3468 | -62.4578 | 1 |
| CHP | 48.1 | DPOS | Decimal Point South | -54.709 | -61.105 | 1 |
| CHP | 48.1 | DREA | Dream Island | -64.2256 | -64.7254 | 4 |
| CHP | 48.1 | DREW | Dream Island West (Casey Islands) | -64.254 | -64.7295 | 1 |
| CHP | 48.1 | DUPT | Duthiers Point | -62.8179 | -64.8049 | 5 |
| CHP | 48.1 | DURO | Duroch Islands | -57.8903 | -63.3033 | 1 |
| CHP | 48.1 | EADI | Eadie Island | -55.929 | -61.482 | 1 |
| CHP | 48.1 | ECKE | Eckener Point | -61.6042 | -64.4309 | 3 |
| CHP | 48.1 | EDWA | Edwards Point | -59.4984 | -62.4629 | 1 |
| CHP | 48.1 | EGAR | East (2-3 km) of Cape Garry | -62.2131 | -63.3555 | 1 |
| CHP | 48.1 | EIN6 | Elephant Island north coast Point 6 | -55.057 | -61.097 | 1 |
| CHP | 48.1 | EIP0 | Elephant Island north coast Point 0 | -55.145 | -61.077 | 1 |
| CHP | 48.1 | EIP1 | Elephant Island north coast Point 1 | -55.113 | -61.091 | 1 |
| CHP | 48.1 | EIP2 | Elephant Island north coast Point 2 | -55.087 | -61.093 | 1 |
| CHP | 48.1 | EIP3 | Elephant Island north coast Point 3 | -55.074 | -61.092 | 1 |
| CHP | 48.1 | EIP5 | Elephant Island north coast Point 5 | -55.057 | -61.094 | 1 |
| CHP | 48.1 | ELPT | Elephant Point | -60.8573 | -62.6924 | 1 |
| CHP | 48.1 | EMER | Emerald Cove | -57.6822 | -61.9062 | 2 |
| CHP | 48.1 | EMPE | Emperor Island | -68.71 | -67.8647 | 1 |
| CHP | 48.1 | ENTR | Entrance Point | -60.5533 | -62.9981 | 9 |
| CHP | 48.1 | ENTW | Entrance Point West | -60.562 | -63.008 | 1 |
| CHP | 48.1 | FARE | Farewell Rock | -61.0183 | -63.8678 | 4 |
| CHP | 48.1 | FARI | False Ridge | -54.052 | -61.283 | 1 |
| CHP | 48.1 | FILD | Fildes Peninsula (Northwest side) | -58.97 | -62.173 | 1 |
| CHP | 48.1 | FORT | Fort Point (Greenwich Island) | -59.58 | -62.542 | 6 |
| CHP | 48.1 | FRPT | False Round Point | -57.9893 | -61.8983 | 1 |
| CHP | 48.1 | FURS | Fur Seal Point | -54.043 | -61.218 | 1 |
| CHP | 48.1 | GAMP | Gam Pt area | -57.9546 | -61.9227 | 1 |
| CHP | 48.1 | GARY | Cape Garry | -62.258 | -63.361 | 1 |
| CHP | 48.1 | GAST | Gaston Islands | -61.827 | -64.4848 | 7 |
| CHP | 48.1 | GEOR | Georges Point (Ronge Island) | -62.6696 | -64.6694 | 22 |
| CHP | 48.1 | GERL | Gerlache Island | -64.214 | -64.601 | 1 |
| CHP | 48.1 | GIBB | Gibbs Island | -55.6385 | -61.471 | 1 |
| CHP | 48.1 | GOLF | Golfcourse Point | -55.473 | -61.128 | 1 |
| CHP | 48.1 | GOUR | Gourdin Island | -57.3074 | -63.1969 | 2 |
| CHP | 48.1 | GREE | The Green Glen | -55.266 | -61.271 | 1 |
| CHP | 48.1 | GRIB | Georges Rib | -54.973 | -61.157 | 1 |
| CHP | 48.1 | GRIN | Grinder Rock | -61.4256 | -63.966 | 1 |
| CHP | 48.1 | HALF | Half Moon Island | -59.918 | -62.596 | 15 |
| CHP | 48.1 | HANN | Hannah Point | -60.6134 | -62.6545 | 9 |
| CHP | 48.1 | HARE | Harmony Point (East) | -59.229 | -62.304 | 1 |
| CHP | 48.1 | HARM | Harmony Point | -59.2425 | -62.3064 | 4 |
| CHP | 48.1 | HERO | Heroina Island | -54.6083 | -63.3944 | 1 |
| CHP | 48.1 | HEYW | Heywood Island | -59.6854 | -62.3174 | 1 |
| CHP | 48.1 | HOOK | Cape Hooker | -61.963 | -63.334 | 1 |
| CHP | 48.1 | HORS | Cape Hooker Rock (South) | -61.982 | -63.345 | 1 |
| CHP | 48.1 | HPNE | Hall Peninsula (North-East) | -61.241 | -62.769 | 1 |
| CHP | 48.1 | HPSW | Hall Peninsula (South-West) | -61.244 | -62.775 | 2 |
| CHP | 48.1 | HRSO | Hydrurga Rocks South | -61.626 | -64.15 | 1 |
| CHP | 48.1 | HUNT | Hunt Island | -62.117 | -64.333 | 1 |
| CHP | 48.1 | HUTB | Hut Bluff | -55.14 | -61.219 | 1 |
| CHP | 48.1 | HYDR | Hydrurga Rocks | -61.6259 | -64.1454 | 6 |
| CHP | 48.1 | INTE | Intercurrence Island | -61.416 | -63.933 | 1 |
| CHP | 48.1 | IOLB | Isles of Litwin Bay | -58.569 | -61.99 | 1 |
| CHP | 48.1 | JACO | Jacobs Ladder | -54.737 | -61.152 | 1 |
| CHP | 48.1 | JACP | Jacques Peak | -61.8342 | -64.5152 | 5 |
| CHP | 48.1 | JAME | Cape James | -62.6979 | -63.0903 | 1 |
| CHP | 48.1 | JAQU | Jaquinot Rocks | -58.421 | -63.441 | 1 |
| CHP | 48.1 | JING | Jingle Island | -65.3253 | -65.4303 | 2 |
| CHP | 48.1 | JORG | Jorge Island | -59.7607 | -62.3798 | 1 |
| CHP | 48.1 | JOUB | Joubin Islands | -64.3992 | -64.7744 | 2 |
| CHP | 48.1 | JPTI | Jameson Point Islands | -62.2622 | -63.2944 | 1 |
| CHP | 48.1 | JPTS | Jameson Point (South) | -62.2524 | -63.3079 | 1 |
| CHP | 48.1 | JPTV | Jameson Point (Vicinity) | -62.2583 | -63.296 | 1 |
| CHP | 48.1 | KELL | Kellick Island | -58.3928 | -61.9186 | 2 |
| CHP | 48.1 | KETL | Ketley Point | -62.7631 | -64.7066 | 1 |
| CHP | 48.1 | KITC | Kitchen Point | -59.347 | -62.387 | 1 |
| CHP | 48.1 | LAIR | Lair Point | -61.0353 | -62.615 | 1 |
| CHP | 48.1 | LAJA | Lajarte Island | -63.4752 | -64.2357 | 1 |
| CHP | 48.1 | LARK | Lafarge Rocks | -57.549 | -63.209 | 1 |
| CHP | 48.1 | LEPP | Islet South of Le Petit Prince | -58.021 | -61.911 | 1 |
| CHP | 48.1 | LION | Lions Rump | -58.1229 | -62.1331 | 9 |
| CHP | 48.1 | LITW | Litwin Bay (SW of Davey Point) | -58.565 | -61.987 | 1 |
| CHP | 48.1 | LLAN | Llano Point | -58.446 | -62.176 | 14 |
| CHP | 48.1 | LLOY | Cape Lloyd | -54.0103 | -61.1298 | 1 |
| CHP | 48.1 | LOBO | Lobodon Island | -61.6009 | -64.086 | 1 |
| CHP | 48.1 | LOOK | Cape Lookout | -55.205 | -61.278 | 3 |
| CHP | 48.1 | MBNE | Miers Bluff Cove (North-East) | -60.431 | -62.716 | 1 |
| CHP | 48.1 | MBNW | Miers Bluff (North-West) | -60.431 | -62.716 | 1 |
| CHP | 48.1 | MEGA | Megaptera Island | -60.806 | -63.678 | 1 |
| CHP | 48.1 | METC | Metchnikoff Point | -62.5747 | -64.041 | 1 |
| CHP | 48.1 | MIDA | Midas Island | -61.1008 | -64.1685 | 4 |
| CHP | 48.1 | MIER | Miers Bluff | -60.4282 | -62.7167 | 3 |
| CHP | 48.1 | MONU | Monument Rocks | -60.9433 | -64.017 | 1 |
| CHP | 48.1 | MOPT | Monroe Point | -61.5162 | -62.8112 | 1 |
| CHP | 48.1 | MPTE | Macaroni Point (East) | -60.543 | -62.8987 | 1 |
| CHP | 48.1 | MPTW | Macaroni Point (West) | -60.5833 | -62.8991 | 2 |
| CHP | 48.1 | MUCK | Muckle Bluff | -54.86 | -61.157 | 1 |
| CHP | 48.1 | NCOI | North of Cornwall Island | -59.702 | -62.33 | 1 |
| CHP | 48.1 | NEPT | Nelly Point | -54.775 | -61.157 | 1 |
| CHP | 48.1 | NEWE | Newell Point | -59.52 | -62.3374 | 1 |
| CHP | 48.1 | NFOR | North Foreland | -57.688 | -61.8928 | 2 |
| CHP | 48.1 | NPRO | Promontories on north-central coast | -62.075 | -63.25 | 1 |
| CHP | 48.1 | OBRI | O'Brien Island | -55.956 | -61.507 | 1 |
| CHP | 48.1 | ORCW | Offshore Rocks off Cape Wallace | -62.228 | -63.235 | 1 |
| CHP | 48.1 | ORNE | Orne Islands | -62.673 | -64.662 | 21 |
| CHP | 48.1 | ORRO | Ornen Rocks | -57.566 | -62.009 | 1 |
| CHP | 48.1 | OWEN | Owen Island | -58.3886 | -61.9332 | 2 |
| CHP | 48.1 | PALA | Palaver Point | -61.759 | -64.1486 | 2 |
| CHP | 48.1 | PAPT | Patelnia Point | -58.472 | -62.235 | 11 |
| CHP | 48.1 | PCHA | Port Charcot | -64.026 | -65.067 | 15 |
| CHP | 48.1 | PENG | Penguin Island | -57.9269 | -62.102 | 10 |
| CHP | 48.1 | PILL | Pillar Ridge | -54.222 | -61.271 | 1 |
| CHP | 48.1 | PING | Pinguino Island | -60.9857 | -64.1435 | 10 |
| CHP | 48.1 | PKUP | Pickup Point | -54.645 | -61.116 | 1 |
| CHP | 48.1 | PLDR | Penguin Ladder | -54.72 | -61.143 | 1 |
| CHP | 48.1 | POPO | Pottinger Point | -58.3582 | -61.9325 | 2 |
| CHP | 48.1 | PPPT | Pink Pool Point | -54.079 | -61.309 | 1 |
| CHP | 48.1 | PTHO | Point Thomas | -58.4615 | -62.1631 | 10 |
| CHP | 48.1 | PTWD | Point Wordie | -55.328 | -61.245 | 1 |
| CHP | 48.1 | PYRI | Pyrites Island | -57.9491 | -61.9241 | 1 |
| CHP | 48.1 | QPTN | Quinton Point (North) | -63.6367 | -64.3144 | 1 |
| CHP | 48.1 | QUPM | Quinton Point (Middle) | -63.683 | -64.335 | 1 |
| CHP | 48.1 | QUPS | Quinton Point (South) | -63.687 | -64.345 | 1 |
| CHP | 48.1 | QUPW | Quinton Point (West) | -63.699 | -64.331 | 1 |
| CHP | 48.1 | RENI | Renier Point | -59.81 | -62.609 | 6 |
| CHP | 48.1 | RIDL | Ridley Island | -58.016 | -61.85 | 1 |
| CHP | 48.1 | RIPP | Rip Point | -59.001 | -62.235 | 1 |
| CHP | 48.1 | ROBE | Robert Point (Robert Is) | -59.383 | -62.45 | 4 |
| CHP | 48.1 | ROME | Romeo Island | -59.9268 | -62.3763 | 1 |
| CHP | 48.1 | ROQU | Cape Roquemaurel | -58.9652 | -63.5486 | 1 |
| CHP | 48.1 | RUGG | Rugged Rocks | -59.816 | -62.601 | 6 |
| CHP | 48.1 | RZEP | Rzepeki Islands | -58.824 | -62.099 | 1 |
| CHP | 48.1 | SAPT | Saddleback Point | -54.901 | -61.099 | 1 |
| CHP | 48.1 | SEAL | Seal Islands | -55.393 | -60.975 | 1 |
| CHP | 48.1 | SEGI | Small island southeast on Gerlache Island | -64.2038 | -64.6037 | 1 |
| CHP | 48.1 | SELV | Selvick Cove | -62.5691 | -64.6405 | 11 |
| CHP | 48.1 | SEMP | Southeast of Monroe Point | -61.478 | -62.83 | 1 |
| CHP | 48.1 | SERA | Serac Point | -54.026 | -61.177 | 1 |
| CHP | 48.1 | SHIL | Shilling Shelf | -54.735 | -61.097 | 1 |
| CHP | 48.1 | SHIR | Cape Shirreff | -60.7874 | -62.4575 | 15 |
| CHP | 48.1 | SHIS | Shag Island | -58.297 | -62.185 | 1 |
| CHP | 48.1 | SMAL | Small Island | -61.4549 | -64.0121 | 1 |
| CHP | 48.1 | SMIG | Smiggers Island | -65.3514 | -65.4597 | 2 |
| CHP | 48.1 | SMIT | Cape Smith | -62.3 | -62.8738 | 1 |
| CHP | 48.1 | SPBL | South Point Bluff | -60.6347 | -63.0158 | 2 |
| CHP | 48.1 | SPIP | Spigot Peak Point | -62.558 | -64.625 | 8 |
| CHP | 48.1 | SPLI | Split Beach | -54.937 | -61.156 | 1 |
| CHP | 48.1 | SPNW | South Point Bluff (North-West) | -60.6702 | -63.0138 | 2 |
| CHP | 48.1 | SPRD | Spigot Peak Ridge | -62.554 | -64.635 | 1 |
| CHP | 48.1 | SPRI | Sprightly Islands Vicinity | -61.072 | -64.283 | 4 |
| CHP | 48.1 | SPTR | Spigot Peak Tripod | -62.5622 | -64.6358 | 12 |
| CHP | 48.1 | STIG | Stigant Point | -58.7185 | -62.023 | 2 |
| CHP | 48.1 | STIS | Stoker Island | -59.848 | -62.397 | 1 |
| CHP | 48.1 | STRA | Stranger Point | -58.6161 | -62.26 | 7 |
| CHP | 48.1 | TAIS | Tauton Island | -59.782 | -62.384 | 1 |
| CHP | 48.1 | TART | Tartar Point | -58.423 | -61.937 | 2 |
| CHP | 48.1 | TAYL | Taylor Point | -57.642 | -61.933 | 2 |
| CHP | 48.1 | TETR | Tetrad Islands | -60.734 | -63.918 | 8 |
| CHP | 48.1 | THUN | Thunder Bay | -54.117 | -61.312 | 1 |
| CHP | 48.1 | TIEA | Trinity I East | -60.683 | -63.883 | 1 |
| CHP | 48.1 | TINW | Trinity I North West | -60.749 | -63.711 | 1 |
| CHP | 48.1 | TISW | Trinity I South West | -60.879 | -63.9 | 2 |
| CHP | 48.1 | TIWE | Trinity I West | -60.829 | -63.833 | 1 |
| CHP | 48.1 | TOWE | Tower Island (East) | -59.779 | -63.591 | 1 |
| CHP | 48.1 | TOWW | Tower Island (West) | -59.876 | -63.56 | 1 |
| CHP | 48.1 | TPTN | Two Points North (of Hooker) | -61.951 | -63.319 | 1 |
| CHP | 48.1 | TRGR | Trident Glacier | -55.241 | -61.278 | 1 |
| CHP | 48.1 | TROW | Trowbridge Islands | -57.6304 | -61.996 | 2 |
| CHP | 48.1 | TRUN | Trundle Island | -65.2885 | -65.3938 | 1 |
| CHP | 48.1 | TTOE | The Toe | -59.1669 | -62.3277 | 2 |
| CHP | 48.1 | TUPI | Tupinier Island | -58.2669 | -63.3702 | 1 |
| CHP | 48.1 | TURR | Turret Point (King George Is) | -57.9514 | -62.0875 | 10 |
| CHP | 48.1 | TWGI | Three islands west of Gerlache Island | -64.2471 | -64.5921 | 1 |
| CHP | 48.1 | TWIN | Twintits Stack | -55.402 | -61.18 | 1 |
| CHP | 48.1 | UCHA | Uchatka Point | -58.439 | -62.22 | 10 |
| CHP | 48.1 | UICW | Unnamed Island off Cape Wallace | -62.1783 | -63.2322 | 1 |
| CHP | 48.1 | UIEL | Unnamed Island off Elephant Point | -60.502 | -62.6 | 1 |
| CHP | 48.1 | UNAI | Unnamed Island in Aitcho Islands | -59.785 | -62.383 | 1 |
| CHP | 48.1 | USEF | Useful Island | -62.864 | -64.717 | 6 |
| CHP | 48.1 | VALE | Cape Valentine | -54.651 | -61.102 | 2 |
| CHP | 48.1 | VAPO | Vapour Col (Deception Is) | -60.721 | -62.992 | 2 |
| CHP | 48.1 | VIET | Vietor Rock | -61.0981 | -62.6831 | 1 |
| CHP | 48.1 | VRNW | Vietor Rock (North-West) | -61.1021 | -62.6746 | 1 |
| CHP | 48.1 | WABL | Cape Wallace Bluff (South) | -62.2664 | -63.2816 | 1 |
| CHP | 48.1 | WALK | Walker Point | -54.697 | -61.143 | 1 |
| CHP | 48.1 | WALL | Cape Wallace | -62.209 | -63.233 | 1 |
| CHP | 48.1 | WATE | Waterboat Point | -62.8581 | -64.8236 | 12 |
| CHP | 48.1 | WDEI | Western Deception Island | -60.752 | -62.952 | 1 |
| CHP | 48.1 | WELC | Welcome Point | -55.429 | -61.134 | 1 |
| CHP | 48.1 | WIIS | Wideopen Islands | -55.849 | -63.004 | 1 |
| CHP | 48.1 | WILD | Point Wild | -54.861 | -61.098 | 1 |
| CHP | 48.1 | WINK | Winkle Island (actually 2 islets next to Winkle Island) | -65.686 | -65.52 | 2 |
| CHP | 48.1 | WINW | Window Island | -61.1237 | -62.5654 | 1 |
| CHP | 48.1 | WITH | Withem Island | -59.1381 | -62.2352 | 1 |
| CHP | 48.1 | WOOI | Wood Island | -60.3042 | -62.4841 | 1 |
| CHP | 48.1 | WORL | Worlds End | -57.996 | -61.856 | 1 |
| CHP | 48.1 | WSAD | West of Saddleback Point (Penguin Island) | -54.963 | -61.106 | 1 |
| CHP | 48.1 | ZAWA | Zawadski Stacks | -58.784 | -62.079 | 1 |
| CHP | 48.1 | ZEDI | Zed Island | -60.166 | -62.433 | 1 |
| CHP | 48.1 | ZIGZ | Zig Zag Island | -59.8419 | -63.6123 | 1 |
| CHP | 48.2 | ACUN | Acuna Island | -44.637 | -60.7612 | 1 |
| CHP | 48.2 | AILS | Ailsa Craig | -44.631 | -60.78 | 1 |
| CHP | 48.2 | AITK | Aitken Cove | -44.525 | -60.738 | 1 |
| CHP | 48.2 | AMPH | Amphibolite Point | -45.339 | -60.684 | 1 |
| CHP | 48.2 | ANDE | Cape Anderson | -44.601 | -60.757 | 1 |
| CHP | 48.2 | BENN | Cape Bennett | -45.236 | -60.62 | 1 |
| CHP | 48.2 | BRUC | Bruce Islands | -44.924 | -60.683 | 1 |
| CHP | 48.2 | BUCH | Buchanan Point | -44.465 | -60.691 | 1 |
| CHP | 48.2 | CHEA | Cheal Point | -45.994 | -60.633 | 1 |
| CHP | 48.2 | CHEC | Crown Head (East Coast) | -45.259 | -60.627 | 1 |
| CHP | 48.2 | COFF | Coffer Island | -45.138 | -60.742 | 1 |
| CHP | 48.2 | CONF | Confusion Island | -45.636 | -60.738 | 1 |
| CHP | 48.2 | CROB | Cape Robertson | -44.84 | -60.714 | 1 |
| CHP | 48.2 | CROW | Crown Head | -45.3269 | -60.624 | 1 |
| CHP | 48.2 | CVIK | Cape Vik | -45.663 | -60.655 | 1 |
| CHP | 48.2 | ECAP | East Cape | -45.201 | -60.633 | 1 |
| CHP | 48.2 | ELLI | Ellium Island | -44.871 | -60.694 | 1 |
| CHP | 48.2 | FERG | Ferguslie Peninsula | -44.567 | -60.693 | 1 |
| CHP | 48.2 | FERR | Ferrier Peninsula | -44.425 | -60.715 | 1 |
| CHP | 48.2 | FITC | Fitchie Bay | -44.494 | -60.714 | 1 |
| CHP | 48.2 | FLOR | Florence Rock | -44.622 | -60.768 | 1 |
| CHP | 48.2 | FRED | Fredriksen Island | -44.9901 | -60.7326 | 1 |
| CHP | 48.2 | FYRC | Fyr Channel | -45.673 | -60.729 | 2 |
| CHP | 48.2 | GEDD | Cape Geddes | -44.59 | -60.685 | 1 |
| CHP | 48.2 | GERD | Gerd Island | -45.7437 | -60.6574 | 1 |
| CHP | 48.2 | GIBA | Gibbon Bay | -45.214 | -60.649 | 1 |
| CHP | 48.2 | GOPT | Gourlay Point | -45.5863 | -60.7309 | 1 |
| CHP | 48.2 | GOSL | Gosling Islands | -45.9178 | -60.6406 | 1 |
| CHP | 48.2 | GOWC | Gosling Islands (West Coast) | -45.908 | -60.64 | 1 |
| CHP | 48.2 | GREY | Grey Island | -45.0149 | -60.7487 | 1 |
| CHP | 48.2 | INAC | Inaccessible Island | -46.7333 | -60.5667 | 1 |
| CHP | 48.2 | LARS | Larsen Island | -46.0777 | -60.5955 | 1 |
| CHP | 48.2 | LOPT | Lola Point | -44.742 | -60.724 | 1 |
| CHP | 48.2 | MABE | Mabel Island | -44.701 | -60.675 | 1 |
| CHP | 48.2 | MACO | Mackintosh Cove (East Coast) | -44.4912 | -60.6851 | 1 |
| CHP | 48.2 | MANS | Mansfield Point | -45.7333 | -60.65 | 1 |
| CHP | 48.2 | MARI | Mariholm | -45.693 | -60.746 | 1 |
| CHP | 48.2 | MARR | Marr Bay (East Coast) | -44.527 | -60.678 | 1 |
| CHP | 48.2 | MART | Point Martin | -44.7185 | -60.7709 | 1 |
| CHP | 48.2 | MATH | Matthews Island | -45.155 | -60.745 | 1 |
| CHP | 48.2 | MEPT | Meier Point | -45.896 | -60.636 | 1 |
| CHP | 48.2 | METH | Methuen Cove | -44.576 | -60.751 | 1 |
| CHP | 48.2 | MICH | Michelsen Island | -45.0233 | -60.7324 | 1 |
| CHP | 48.2 | MICV | Mill Cove | -44.614 | -60.753 | 1 |
| CHP | 48.2 | MLGE | McLeod Glacier (east) | -45.625 | -60.721 | 1 |
| CHP | 48.2 | MLGW | McLeod Glacier (west) | -45.6 | -60.7 | 1 |
| CHP | 48.2 | MOEI | Moe Island | -45.691 | -60.734 | 1 |
| CHP | 48.2 | MOSS | West coast of Mossman Peninsula | -44.753 | -60.772 | 1 |
| CHP | 48.2 | MOYE | Moyes | -45.66 | -60.732 | 1 |
| CHP | 48.2 | MURR | Murray Islands | -44.524 | -60.773 | 1 |
| CHP | 48.2 | NOPT | North Point | -45.626 | -60.672 | 2 |
| CHP | 48.2 | NORW | Norway Bight | -45.816 | -60.616 | 1 |
| CHP | 48.2 | OLIC | Oliphant Channel | -45.592 | -60.729 | 1 |
| CHP | 48.2 | OLII | Oliphant Islands | -45.594 | -60.736 | 1 |
| CHP | 48.2 | PAGE | Pageant Point | -45.5843 | -60.7286 | 1 |
| CHP | 48.2 | PAND | Pandemonium Point | -45.648 | -60.736 | 2 |
| CHP | 48.2 | PANT | Pantomime Point | -45.5833 | -60.7266 | 1 |
| CHP | 48.2 | PIRI | Pirie Peninsula | -44.662 | -60.69 | 1 |
| CHP | 48.2 | POWE | Powell Island | -45.029 | -60.725 | 1 |
| CHP | 48.2 | PRAE | Point Rae | -44.633 | -60.757 | 1 |
| CHP | 48.2 | PTCT | Point Cormorant | -44.732 | -60.756 | 1 |
| CHP | 48.2 | PTLA | Point Lola | -44.738 | -60.724 | 1 |
| CHP | 48.2 | PURD | Purdy Point | -45.4333 | -60.5333 | 1 |
| CHP | 48.2 | RAYN | Rayner Point | -45.191 | -60.648 | 1 |
| CHP | 48.2 | ROCA | Cape Roca | -44.8167 | -60.75 | 1 |
| CHP | 48.2 | RUDM | Rudmose Rocks | -44.602 | -60.676 | 1 |
| CHP | 48.2 | SADD | Saddle Island | -44.855 | -60.617 | 1 |
| CHP | 48.2 | SAND | Sandefjord Bay | -46.0367 | -60.605 | 1 |
| CHP | 48.2 | SHAG | Shagnasty Island | -45.618 | -60.732 | 1 |
| CHP | 48.2 | SHCV | Sheila Cove | -44.7883 | -60.7364 | 1 |
| CHP | 48.2 | SKIL | Skilling Island (North Coast) | -45.15 | -60.7833 | 1 |
| CHP | 48.2 | SMAT | Unnamed Islands (South of Matthews Island) | -45.154 | -60.742 | 1 |
| CHP | 48.2 | SPIN | Spine Island (Coronation Is) | -46.0202 | -60.594 | 1 |
| CHP | 48.2 | SPRO | Spindrift Rocks | -45.644 | -60.683 | 2 |
| CHP | 48.2 | SPUI | Spence Harbour & Unnamed Island | -45.169 | -60.699 | 1 |
| CHP | 48.2 | STEE | Steepholm Islands | -45.15 | -60.7833 | 1 |
| CHP | 48.2 | STEN | Stene Point | -45.707 | -60.654 | 1 |
| CHP | 48.2 | TTUR | The Turret | -45.166 | -60.67 | 1 |
| CHP | 48.2 | VAIS | Valette Island | -44.622 | -60.758 | 1 |
| CHP | 48.2 | WHIT | Cape Whitson | -44.544 | -60.748 | 1 |
| CHP | 48.2 | WPEC | Watson Peninsula (East Coast) | -44.5436 | -60.6761 | 1 |
| CHP | 48.2 | WPWC | Watson Peninsula (West Coast) | -44.551 | -60.675 | 1 |
| CHP | 88.1 | CHII | Chinstrap Islet, Balleny Islands | 163.311 | -66.925 | 2 |
| CHP | 88.1 | SABR | Sabrina Island, Balleny Islands | 163.309 | -66.9171 | 4 |
| EMP | 48.1 | SNOW | Snow Hill Island | -57.44 | -64.52 | 1 |
| EMP | 48.5 | DAWS | Dawson | -26.67 | -76.02 | 1 |
| EMP | 48.5 | DOLL | Dolleman | -60.43 | -70.61 | 1 |
| EMP | 48.5 | GOUL | Gould | -47.68 | -77.71 | 1 |
| EMP | 48.5 | HALY | Halley | -27.43 | -75.54 | 1 |
| EMP | 48.5 | LAIS | Larsen Ice Shelf | -60.6737 | -66.0996 | 1 |
| EMP | 48.5 | LUIT | Luitpold | -33.552 | -77.271 | 1 |
| EMP | 48.5 | SMTH | Smith | -60.83 | -74.37 | 1 |
| EMP | 48.5 | STCB | Stancomb | -23.089 | -74.039 | 2 |
| EMP | 48.6 | ASTD | Astrid | 8.31 | -69.95 | 1 |
| EMP | 48.6 | ATKA | Atka | -8.13 | -70.61 | 1 |
| EMP | 48.6 | DRES | Drescher | -19.34 | -72.83 | 1 |
| EMP | 48.6 | LAZA | Lazarev | 15.55 | -69.75 | 1 |
| EMP | 48.6 | RAGN | Ragnhild | 27.15 | -69.9 | 1 |
| EMP | 48.6 | RIIS | Riiser | -15.11 | -72.12 | 1 |
| EMP | 48.6 | SANA | Sanae | -1.42 | -70 | 1 |
| EMP | 88.1 | BEAU | Beaufort Island | 166.8978 | -76.9694 | 13 |
| EMP | 88.1 | COUL | Coulman Island | 169.61 | -73.35 | 8 |
| EMP | 88.1 | CROZ | Cape Crozier | 169.32 | -77.46 | 11 |
| EMP | 88.1 | DBAY | Davis Bay | 158.49 | -69.35 | 1 |
| EMP | 88.1 | FRAN | Franklin Island | 168.43 | -76.18 | 11 |
| EMP | 88.1 | ROGE | Cape Roget | 170.59 | -71.99 | 6 |
| EMP | 88.1 | WASH | Cape Washington | 165.37 | -74.64 | 9 |
| EMP | 88.2 | BEAR | Bear Peninsula | -110.192 | -74.3922 | 1 |
| EMP | 88.2 | CBEK | Cape Colbeck, Edward VII Peninsula | -157.7 | -77.14 | 4 |
| EMP | 88.2 | LEDD | Ledda Bay | -130.784 | -74.228 | 1 |
| EMP | 88.2 | RUPE | Rupert Coast | -143.3 | -75.38 | 1 |
| EMP | 88.2 | THUR | Thurston Glacier, Mount Siple | -125.621 | -73.5 | 1 |
| EMP | 88.3 | BRCO | Bryan Coast | -85.3477 | -73.2491 | 1 |
| EMP | 88.3 | BSON | Brownson Islands | -103.636 | -74.1681 | 1 |
| EMP | 88.3 | NOVI | Noville Peninsula | -98.45 | -71.77 | 1 |
| EMP | 88.3 | ROTI | Rotschild Island | -72.2293 | -69.5209 | 1 |
| EMP | 88.3 | SMYL | Smyley | -78.83 | -72.3 | 1 |
| EMP | 58.4.1 | BARB | Barrier Bay | 81.39 | -66.301 | 3 |
| EMP | 58.4.1 | BOWM | Bowman Island | 103.07 | -65.16 | 2 |
| EMP | 58.4.1 | BUIS | Burton Ice Shelf | 89.69544 | -66.2719 | 1 |
| EMP | 58.4.1 | DIBB | Dibble Glacier | 134.79 | -66.01 | 1 |
| EMP | 58.4.1 | HASW | Haswell Island | 93.01 | -66.52 | 3 |
| EMP | 58.4.1 | MBOF | Mertz Break Off | 145.8335 | -67.3656 | 1 |
| EMP | 58.4.1 | MERT | Mertz Glacier | 146.62 | -66.892 | 1 |
| EMP | 58.4.1 | PGEO | Point Geologie | 140.01 | -66.67 | 3 |
| EMP | 58.4.1 | PSON | Peterson Bank | 110.23 | -65.92 | 1 |
| EMP | 58.4.1 | SACO | Sabrina Coast | 121.136 | -66.161 | 1 |
| EMP | 58.4.1 | SHAC | Shackleton Ice Shelf | 96.02 | -64.86 | 2 |
| EMP | 58.4.1 | WEIS | West Ice Shelf | 81.93087 | -67.225 | 1 |
| EMP | 58.4.2 | AMAN | Amanda Bay | 76.83 | -69.27 | 2 |
| EMP | 58.4.2 | AMUN | Amundsen Bay | 50.55 | -66.78 | 1 |
| EMP | 58.4.2 | AUST | Auster Islands | 63.98 | -67.39 | 3 |
| EMP | 58.4.2 | DARN | Cape Darnley | 69.7 | -67.88 | 2 |
| EMP | 58.4.2 | FOLD | Fold Island | 59.32 | -67.32 | 1 |
| EMP | 58.4.2 | GUNN | Gunnerus | 34.38 | -68.75 | 1 |
| EMP | 58.4.2 | KLOA | Kloa Point | 57.28 | -66.64 | 1 |
| EMP | 58.4.2 | TAYG | Taylor Glacier | 60.88 | -67.45 | 3 |
| EMP | 58.4.2 | UMBE | Umbeashi | 43.01 | -68.05 | 1 |
| GEP | 48.1 | AITC | Barrientos Island (Aitcho Islands) | -59.7517 | -62.4071 | 13 |
| GEP | 48.1 | ALMI | Brown Station | -62.8703 | -64.8956 | 14 |
| GEP | 48.1 | ARDL | Ardley Island | -58.933 | -62.213 | 19 |
| GEP | 48.1 | BARN | Barnard Point (Livingston Island) | -60.338 | -62.758 | 2 |
| GEP | 48.1 | BART | Barton Peninsula | -58.791 | -62.224 | 16 |
| GEP | 48.1 | BENE | Beneden Head | -62.701 | -64.7671 | 6 |
| GEP | 48.1 | BISC | Biscoe Point | -63.7775 | -64.8114 | 18 |
| GEP | 48.1 | BRAS | Brash Island | -54.9142 | -63.3864 | 1 |
| GEP | 48.1 | BRIT | Brittannia's Figleaf | -55.213 | -61.278 | 2 |
| GEP | 48.1 | BROW | Brown Bluff | -56.905 | -63.5222 | 17 |
| GEP | 48.1 | BRYE | Bryde Island East | -62.9272 | -64.8897 | 13 |
| GEP | 48.1 | BRYS | Bryde Island South | -62.9508 | -64.9011 | 11 |
| GEP | 48.1 | CHPT | Charles Point | -61 | -64.236 | 4 |
| GEP | 48.1 | CIER | Cierva Point | -60.96 | -64.157 | 9 |
| GEP | 48.1 | CONW | Cape Conway | -61.4224 | -62.8415 | 1 |
| GEP | 48.1 | CUVE | Cuverville Island | -62.626 | -64.684 | 16 |
| GEP | 48.1 | DAMO | Dorian Bay/Damoy Point | -63.4968 | -64.8149 | 20 |
| GEP | 48.1 | DANC | Danco Island | -62.5938 | -64.734 | 15 |
| GEP | 48.1 | DOBE | Dorian Beacon | -63.5114 | -64.8111 | 12 |
| GEP | 48.1 | DUND | Dundee Island | -55.966 | -63.483 | 1 |
| GEP | 48.1 | DUPT | Duthiers Point | -62.8179 | -64.8049 | 4 |
| GEP | 48.1 | DURV | d'Urville Monument | -56.2944 | -63.4267 | 1 |
| GEP | 48.1 | EARL | Earle Island | -54.7833 | -63.4833 | 1 |
| GEP | 48.1 | ELPT | Elephant Point | -60.8573 | -62.6924 | 1 |
| GEP | 48.1 | FORT | Fort Point (Greenwich Island) | -59.58 | -62.542 | 5 |
| GEP | 48.1 | GALE | Galindez Island East | -64.2399 | -65.2476 | 4 |
| GEP | 48.1 | GALS | Galindez Island South | -64.246 | -65.252 | 2 |
| GEP | 48.1 | GEOR | Georges Point (Ronge Island) | -62.6696 | -64.6694 | 15 |
| GEP | 48.1 | GERL | Gerlache Island | -64.214 | -64.601 | 2 |
| GEP | 48.1 | GLAN | Glandaz Point | -63.9591 | -65.0911 | 6 |
| GEP | 48.1 | GOUR | Gourdin Island | -57.3074 | -63.1969 | 2 |
| GEP | 48.1 | GREE | The Green Glen | -55.266 | -61.271 | 1 |
| GEP | 48.1 | GRIB | Georges Rib | -54.973 | -61.157 | 1 |
| GEP | 48.1 | HANN | Hannah Point | -60.6134 | -62.6545 | 4 |
| GEP | 48.1 | HARM | Harmony Point | -59.2425 | -62.3064 | 2 |
| GEP | 48.1 | HERO | Heroina Island | -54.6083 | -63.3944 | 2 |
| GEP | 48.1 | HOPE | Hope Bay | -56.9978 | -63.3972 | 2 |
| GEP | 48.1 | HOVG | Hovgaard Island | -64.1264 | -65.1311 | 1 |
| GEP | 48.1 | HUMP | Humphries Heights | -63.8637 | -65.0557 | 7 |
| GEP | 48.1 | HURE | Hurd Peninsula (east) | -60.379 | -62.695 | 1 |
| GEP | 48.1 | HURW | Hurd Peninsula (west) | -60.406 | -62.674 | 2 |
| GEP | 48.1 | HUTB | Hut Bluff | -55.14 | -61.219 | 1 |
| GEP | 48.1 | JADE | Jade Point | -57.5935 | -63.6028 | 1 |
| GEP | 48.1 | JOHN | Johnson's Dock | -60.3675 | -62.6604 | 1 |
| GEP | 48.1 | JONA | Jonassen Island | -56.6834 | -63.5425 | 3 |
| GEP | 48.1 | JOUB | Joubin Islands | -64.3992 | -64.7744 | 4 |
| GEP | 48.1 | JOUG | Jougla Point | -63.4932 | -64.827 | 25 |
| GEP | 48.1 | KETL | Ketley Point | -62.7631 | -64.7066 | 1 |
| GEP | 48.1 | KNOB | Knobble Head, Bransfield Island | -56.5694 | -63.1619 | 1 |
| GEP | 48.1 | LAUT | Lautaro Neck | -63.1027 | -64.8285 | 1 |
| GEP | 48.1 | LEGU | Cape Leguillou | -59.843 | -63.5427 | 1 |
| GEP | 48.1 | LION | Lions Rump | -58.1229 | -62.1331 | 8 |
| GEP | 48.1 | LLAN | Llano Point | -58.446 | -62.176 | 28 |
| GEP | 48.1 | LOCK | Port Lockroy | -63.484 | -64.8231 | 19 |
| GEP | 48.1 | LOOK | Cape Lookout | -55.205 | -61.278 | 3 |
| GEP | 48.1 | LOUB | Loubat Point | -63.9265 | -65.0776 | 4 |
| GEP | 48.1 | MADD | Madder Cliff (Joinville Island) | -56.4831 | -63.2989 | 4 |
| GEP | 48.1 | MADI | Madder Cliff Island | -56.499 | -63.306 | 2 |
| GEP | 48.1 | MIKK | Mikkelsen Harbor (Trinity Island) | -60.791 | -63.9022 | 12 |
| GEP | 48.1 | MONA | Cape Monaco | -64.2782 | -64.7171 | 1 |
| GEP | 48.1 | MOOT | Moot Point | -64.078 | -65.2062 | 8 |
| GEP | 48.1 | MUCK | Muckle Bluff | -54.86 | -61.157 | 1 |
| GEP | 48.1 | NEKO | Neko Harbor (Andvord Bay) | -62.5327 | -64.8383 | 19 |
| GEP | 48.1 | NOBL | Noble Rocks | -63.4335 | -64.7849 | 4 |
| GEP | 48.1 | ONEI | O'Neill Point | -63.0901 | -64.8162 | 4 |
| GEP | 48.1 | ORNE | Orne Islands | -62.673 | -64.662 | 11 |
| GEP | 48.1 | PABE | Paradise Harbor Beacon (Paradise Bay) | -62.9311 | -64.9111 | 2 |
| GEP | 48.1 | PATE | Patella Island | -55.5238 | -63.1294 | 1 |
| GEP | 48.1 | PCHA | Port Charcot | -64.026 | -65.067 | 12 |
| GEP | 48.1 | PEIN | Peine Island (Comb Island) | -54.717 | -63.411 | 1 |
| GEP | 48.1 | PETE | Petermann Island | -64.137 | -65.176 | 13 |
| GEP | 48.1 | PLAT | Plato Island (Platter Island) | -54.6742 | -63.433 | 1 |
| GEP | 48.1 | PLEN | Pleneau Island | -64.0556 | -65.104 | 16 |
| GEP | 48.1 | PRIM | Prime Head | -57.305 | -63.2129 | 1 |
| GEP | 48.1 | PRIN | Principal Point | -63.431 | -64.9121 | 2 |
| GEP | 48.1 | PTHO | Point Thomas | -58.4615 | -62.1631 | 11 |
| GEP | 48.1 | PTWD | Point Wordie | -55.328 | -61.245 | 9 |
| GEP | 48.1 | PYPT | Py Point | -63.5974 | -64.8792 | 3 |
| GEP | 48.1 | QPTN | Quinton Point (north) | -63.6367 | -64.3144 | 1 |
| GEP | 48.1 | RIPP | Rip Point | -59.001 | -62.235 | 1 |
| GEP | 48.1 | ROBE | Robert Point (Robert Island) | -59.383 | -62.45 | 4 |
| GEP | 48.1 | RONE | Ronge Island East | -62.6436 | -64.6884 | 11 |
| GEP | 48.1 | SANE | San Eliado Point | -63.1166 | -64.844 | 3 |
| GEP | 48.1 | SAXU | Saxum Nunatak | -56.0533 | -63.1367 | 1 |
| GEP | 48.1 | SELV | Selvick Cove | -62.5691 | -64.6405 | 11 |
| GEP | 48.1 | SHIR | Cape Shirreff | -60.7874 | -62.4575 | 13 |
| GEP | 48.1 | SKOT | Skottsberg Point | -60.8089 | -63.9205 | 8 |
| GEP | 48.1 | SPIP | Spigot Peak Point | -62.558 | -64.625 | 4 |
| GEP | 48.1 | SPTR | Spigot Peak Tripod | -62.5622 | -64.6358 | 5 |
| GEP | 48.1 | STAC | Stackpole Rocks | -60.9574 | -62.678 | 1 |
| GEP | 48.1 | STER | Sterneck Island | -60.9826 | -64.201 | 4 |
| GEP | 48.1 | STRA | Stranger Point | -58.6161 | -62.26 | 5 |
| GEP | 48.1 | TRIA | Triangle Point | -59.839 | -62.522 | 1 |
| GEP | 48.1 | TRUA | Truant Island | -63.407 | -64.923 | 1 |
| GEP | 48.1 | TUXE | Cape Tuxen | -64.1178 | -65.2667 | 4 |
| GEP | 48.1 | TXRX | Tuxen Rocks | -64.1334 | -65.2549 | 1 |
| GEP | 48.1 | USEF | Useful Island | -62.864 | -64.717 | 5 |
| GEP | 48.1 | VERN | Vernadsky Station | -64.2567 | -65.2453 | 5 |
| GEP | 48.1 | WATE | Waterboat Point | -62.8581 | -64.8236 | 10 |
| GEP | 48.1 | WILD | Point Wild | -54.861 | -61.098 | 1 |
| GEP | 48.1 | YALO | Yalour Islands | -64.1564 | -65.2389 | 4 |
| GEP | 48.1 | YANK | Yankee Harbor | -59.7687 | -62.5257 | 10 |
| GEP | 48.2 | CHRI | Christoffersen Island | -45.035 | -60.728 | 1 |
| GEP | 48.2 | GOSL | Gosling Islands | -45.9178 | -60.6406 | 1 |
| GEP | 48.2 | NOPT | North Point | -45.626 | -60.672 | 3 |
| GEP | 48.2 | POWE | Powell Island | -45.029 | -60.725 | 1 |
| GEP | 48.2 | WEDD | Weddell Island | -44.8479 | -60.6359 | 1 |
| GEP | 48.2 | WPEC | Watson Peninsula (east coast) | -44.5436 | -60.6761 | 2 |
